# Supplementary material for: A Comparative Transcriptome Analysis Reveals Physiological Maturation Properties of Mycelia in Pleurotus tuoliensis
Source: Genes (Basel). 2019 Sep 11;10(9):703. doi: 10.3390/genes10090703 (PMC6770963; doi:10.3390/genes10090703)
Supplement: Supplementary file 1 [file genes-10-00703-s001.xlsx]

## Sheet: Table S1
Description	number	category
A:RNA processing and modification	480	A
B:Chromatin structure and dynamics	186	B
C:Energy production and conversion	431	C
D:Cell cycle control, cell division, chromosome partitioning	252	D
E:Amino acid transport and metabolism	403	E
F:Nucleotide transport and metabolism	131	F
G:Carbohydrate transport and metabolism	682	G
H:Coenzyme transport and metabolism	147	H
I:Lipid transport and metabolism	456	I
J:Translation, ribosomal structure and biogenesis	510	J
K:Transcription	493	K
L:Replication, recombination and repair	480	L
M:Cell wall/membrane/envelope biogenesis	100	M
N:Cell motility	4	N
O:Posttranslational modification, protein turnover, chaperones	894	O
P:Inorganic ion transport and metabolism	274	P
Q:Secondary metabolites biosynthesis, transport and catabolism	552	Q
R:General function prediction only	2527	R
S:Function unknown	3614	S
T:Signal transduction mechanisms	747	T
U:Intracellular trafficking, secretion, and vesicular transport	581	U
V:Defense mechanisms	92	V
W:Extracellular structures	8	W
X:Undetermined	0	X
Y:Nuclear structure	51	Y
Z:Cytoskeleton	205	Z

## Sheet: Table S2
query_name	hsp	query_length	subject_length	query_coverage(%)	subject_coverage(%)	annotation	score	bit_score	evalue	identity(%)	query_frame	query_start	query_end	subject_frame	subject_start	subject_end
TRINITY_DN9347_c2_g1	1	11051	561	10.7	67.02	sp|Q91WT9|CBS_MOUSE Cystathionine beta-synthase OS=Mus musculus GN=Cbs PE=1 SV=3	710	278.1	6.6425e-78	49.75	-3	7480	8661	0	21	396
TRINITY_DN8618_c0_g1	1	7132	1462	43.54	66.35	sp|Q9P7R8|YHV3_SCHPO Uncharacterized protein C211.03 OS=Schizosaccharomyces pombe (strain 972 / ATCC 24843) GN=SPBC211.03c PE=1 SV=1	1288	500.745	3.27471e-146	32.27	3	78	3182	0	24	993
TRINITY_DN9231_c1_g2	1	6320	471	14.38	65.18	sp|O13332|AUR1_CANAL Inositol phosphorylceramide synthase OS=Candida albicans (strain SC5314 / ATCC MYA-2876) GN=AUR1 PE=1 SV=2	721	282.337	8.10249e-81	46.1	-1	5202	6110	0	30	336
TRINITY_DN9081_c0_g1	1	5781	1261	28.39	42.11	sp|Q10451|PPR5_SCHPO Pentatricopeptide repeat-containing protein 5, mitochondrial OS=Schizosaccharomyces pombe (strain 972 / ATCC 24843) GN=ppr5 PE=4 SV=2	641	251.521	3.08375e-66	31.44	-2	1713	3353	0	702	1232
TRINITY_DN9222_c0_g1	1	5570	559	21.92	66.55	sp|Q01772|GLOX_PHACH Aldehyde oxidase GLOX OS=Phanerochaete chrysosporium GN=GLX PE=1 SV=1	546	214.927	4.4458e-57	35.84	3	3180	4400	0	188	559
TRINITY_DN9181_c0_g1	1	5329	1052	12.61	21.39	sp|O42656|RIC1_SCHPO Guanine nucleotide exchange factor subunit ric1 OS=Schizosaccharomyces pombe (strain 972 / ATCC 24843) GN=ric1 PE=1 SV=2	263	105.916	2.15843e-21	29.65	2	1499	2170	0	427	651
TRINITY_DN7837_c0_g2	1	5140	434	7.7	29.26	sp|P23262|NHG1_PSEPU Salicylate hydroxylase OS=Pseudomonas putida GN=nahG PE=1 SV=4	205	83.5741	4.72118e-15	35.82	-3	3330	3725	0	285	411
TRINITY_DN9305_c0_g1	1	4764	757	38.48	87.05	sp|Q304B9|NCER2_ARATH Neutral ceramidase 2 OS=Arabidopsis thaliana GN=NCER2 PE=3 SV=1	1285	499.59	1.676e-155	41.16	-2	771	2603	0	82	740
TRINITY_DN8739_c0_g4	1	4380	1367	49.25	52.52	sp|Q01397|DYNA_NEUCR Dynactin, 150 kDa isoform OS=Neurospora crassa (strain ATCC 24698 / 74-OR23-1A / CBS 708.71 / DSM 1257 / FGSC 987) GN=ro-3 PE=3 SV=3	674	264.233	2.61906e-74	30.77	-2	672	2828	0	485	1202
TRINITY_DN7995_c0_g1	1	4265	508	5.91	12.99	sp|P0DPA7|PSIH_PSICU Cytochrome P450 monooxygenase psiH OS=Psilocybe cubensis GN=psiH PE=1 SV=1	127	53.5286	6.87292e-16	29.76	-1	96	347	0	440	505
TRINITY_DN6220_c0_g1	1	4109	280	10.37	48.21	sp|Q63340|DUS7_RAT Dual specificity protein phosphatase 7 (Fragment) OS=Rattus norvegicus GN=Dusp7 PE=2 SV=1	182	74.7146	5.51617e-13	33.57	-1	597	1022	0	109	243
TRINITY_DN6195_c1_g1	1	4034	1606	34.43	28.83	sp|B0D6H2|ARO1_LACBS Pentafunctional AROM polypeptide OS=Laccaria bicolor (strain S238N-H82 / ATCC MYA-4686) GN=LACBIDRAFT_233717 PE=3 SV=1	2076	804.283	0	84.45	3	969	2357	0	1	463
TRINITY_DN8731_c0_g2	1	3953	1830	42.27	31.2	sp|Q4P328|SWR1_USTMA Helicase SWR1 OS=Ustilago maydis (strain 521 / FGSC 9021) GN=SWR1 PE=3 SV=1	1595	619.002	0	56.6	1	2260	3930	0	1045	1615
TRINITY_DN7270_c0_g1	1	3810	655	37.09	71.45	sp|Q5EB92|WDR70_RAT WD repeat-containing protein 70 OS=Rattus norvegicus GN=Wdr70 PE=1 SV=1	989	385.571	8.55201e-117	43.91	-2	201	1613	0	170	637
TRINITY_DN7768_c0_g2	1	3736	683	8.83	16.4	sp|P34243|HCS1_YEAST DNA polymerase alpha-associated DNA helicase A OS=Saccharomyces cerevisiae (strain ATCC 204508 / S288c) GN=HCS1 PE=1 SV=1	287	115.161	1.68715e-45	51.72	-3	2445	2774	0	569	680
TRINITY_DN7510_c0_g1	1	3659	607	38.86	71	sp|Q4R4T0|RPN1_MACFA Dolichyl-diphosphooligosaccharide--protein glycosyltransferase subunit 1 OS=Macaca fascicularis GN=RPN1 PE=2 SV=1	467	184.496	3.5506e-47	27.44	2	2222	3643	0	33	463
TRINITY_DN9321_c0_g1	1	3585	508	4.52	10.83	sp|P0DPA7|PSIH_PSICU Cytochrome P450 monooxygenase psiH OS=Psilocybe cubensis GN=psiH PE=1 SV=1	149	62.003	5.17489e-24	49.09	-3	1253	1414	0	360	414
TRINITY_DN8822_c0_g1	1	3529	393	20.74	58.78	sp|O59797|YCO6_SCHPO Putative nucleosome assembly protein C364.06 OS=Schizosaccharomyces pombe (strain 972 / ATCC 24843) GN=SPCC364.06 PE=1 SV=1	405	160.614	1.06486e-46	48.78	-1	536	1267	0	112	342
TRINITY_DN6778_c0_g2	1	3477	489	38.22	88.14	sp|P53390|MEP3_YEAST Ammonium transporter MEP3 OS=Saccharomyces cerevisiae (strain ATCC 204508 / S288c) GN=MEP3 PE=1 SV=1	1157	450.284	5.04639e-144	52.48	1	613	1941	0	37	467
TRINITY_DN8506_c0_g1	1	3422	580	10.7	21.72	sp|P87035|GPA4_USTMA Guanine nucleotide-binding protein alpha-4 subunit OS=Ustilago maydis (strain 521 / FGSC 9021) GN=GPA4 PE=3 SV=1	186	76.2554	3.32194e-28	32.31	2	2156	2521	0	307	432
TRINITY_DN8927_c0_g1	1	3358	299	8.93	33.11	sp|O95685|PPR3D_HUMAN Protein phosphatase 1 regulatory subunit 3D OS=Homo sapiens GN=PPP1R3D PE=1 SV=1	175	72.0182	4.52177e-12	37.25	3	1371	1670	0	177	275
TRINITY_DN5681_c0_g1	1	3308	172	9.7	55.81	sp|O94279|MGDP1_SCHPO Putative magnesium-dependent phosphatase P8B7.31 OS=Schizosaccharomyces pombe (strain 972 / ATCC 24843) GN=SPBP8B7.31 PE=1 SV=2	248	100.138	5.41625e-22	42.99	1	1	321	0	56	151
TRINITY_DN8586_c0_g2	1	3269	1469	82.04	60.99	sp|B0E2U2|VPS10_LACBS Vacuolar protein sorting/targeting protein 10 OS=Laccaria bicolor (strain S238N-H82 / ATCC MYA-4686) GN=VPS10 PE=3 SV=1	3314	1281.16	0	69.6	-1	492	3173	0	33	928
TRINITY_DN7983_c0_g1	1	3227	575	46.58	86.26	sp|Q10286|ITR1_SCHPO Myo-inositol transporter 1 OS=Schizosaccharomyces pombe (strain 972 / ATCC 24843) GN=itr1 PE=3 SV=1	1181	459.529	3.80148e-147	48.3	1	13	1515	0	79	574
TRINITY_DN9312_c0_g1	1	3033	648	24.04	35.03	sp|A4DA70|AGALD_ASPFU Probable alpha-galactosidase D OS=Neosartorya fumigata (strain ATCC MYA-4609 / Af293 / CBS 101355 / FGSC A1100) GN=aglD PE=3 SV=2	517	203.756	9.97885e-54	43.55	-2	2304	3032	0	179	405
TRINITY_DN8534_c0_g2	1	2926	770	66.54	74.81	sp|D4ATR3|A7629_ARTBC Uncharacterized secreted glycosidase ARB_07629 OS=Arthroderma benhamiae (strain ATCC MYA-4681 / CBS 112371) GN=ARB_07629 PE=1 SV=1	776	303.523	7.98622e-91	33.13	-2	541	2487	0	78	653
TRINITY_DN9261_c0_g2	1	2896	350	15.02	41.43	sp|Q4P7Y8|MCR1_USTMA NADH-cytochrome b5 reductase 2 OS=Ustilago maydis (strain 521 / FGSC 9021) GN=MCR1 PE=3 SV=1	161	66.6254	1.53151e-21	26.53	1	1822	2256	0	82	226
TRINITY_DN8490_c0_g1	1	2861	346	10.28	21.97	sp|P25344|STE50_YEAST Protein STE50 OS=Saccharomyces cerevisiae (strain ATCC 204508 / S288c) GN=STE50 PE=1 SV=1	136	56.9954	4.08893e-07	27.55	-1	1536	1829	0	253	328
TRINITY_DN6719_c0_g3	1	2833	606	36.96	54.62	sp|Q1MTR1|IRC3_SCHPO Putative mitochondrial ATP-dependent helicase irc3 OS=Schizosaccharomyces pombe (strain 972 / ATCC 24843) GN=irc3 PE=3 SV=2	616	241.891	4.48874e-75	40.11	-1	1667	2713	0	22	352
TRINITY_DN7106_c0_g1	1	2800	527	22.93	41.18	sp|O77775|NCF2_BOVIN Neutrophil cytosol factor 2 OS=Bos taurus GN=NCF2 PE=2 SV=1	345	137.502	1.45587e-32	37.79	2	227	868	0	1	217
TRINITY_DN4644_c0_g1	1	2770	546	38.01	72.34	sp|P0CM32|ATG22_CRYNJ Autophagy-related protein 22 OS=Cryptococcus neoformans var. neoformans serotype D (strain JEC21 / ATCC MYA-565) GN=ATG22 PE=3 SV=1	559	219.935	4.16966e-69	36.45	-2	1708	2760	0	86	480
TRINITY_DN5294_c0_g1	1	2737	596	68.07	95.81	sp|C5FBW2|SED2_ARTOC Tripeptidyl-peptidase SED2 OS=Arthroderma otae (strain ATCC MYA-4605 / CBS 113480) GN=SED2 PE=3 SV=1	1059	412.535	1.34847e-130	38.21	-3	150	2012	0	24	594
TRINITY_DN7643_c0_g2	1	2700	500	11.33	20.6	sp|Q59KI0|UGP1_CANAL UTP--glucose-1-phosphate uridylyltransferase OS=Candida albicans (strain SC5314 / ATCC MYA-2876) GN=UGP1 PE=1 SV=2	277	111.309	2.77922e-24	51.46	-3	2	307	0	17	119
TRINITY_DN9107_c0_g1	1	2653	294	18.21	54.42	sp|A8NX72|TVP38_COPC7 Golgi apparatus membrane protein TVP38 OS=Coprinopsis cinerea (strain Okayama-7 / 130 / ATCC MYA-4618 / FGSC 9003) GN=TVP38 PE=3 SV=1	492	194.126	2.4307e-83	57.76	-3	2082	2564	0	1	160
TRINITY_DN9059_c0_g1	1	2628	1029	41.1	29.64	sp|Q9FNI6|SM3L2_ARATH DNA repair protein RAD5A OS=Arabidopsis thaliana GN=RAD5A PE=1 SV=1	364	144.821	4.08134e-40	28.53	3	1434	2513	0	578	882
TRINITY_DN7181_c0_g1	1	2607	382	30.26	67.54	sp|P33300|SUR1_YEAST Mannosyl phosphorylinositol ceramide synthase SUR1 OS=Saccharomyces cerevisiae (strain ATCC 204508 / S288c) GN=SUR1 PE=1 SV=1	574	225.713	3.9245e-64	45.86	2	35	823	0	5	262
TRINITY_DN7303_c0_g1	1	2559	549	36.81	52.64	sp|Q2UPC7|ACLH_ASPOR Flavine halogenase aclH OS=Aspergillus oryzae (strain ATCC 42149 / RIB 40) GN=aclH PE=1 SV=1	544	214.157	5.10071e-86	38.92	-2	408	1349	0	230	518
TRINITY_DN7393_c0_g1	1	2509	625	11.24	15.2	sp|Q9UTI7|TYSY_SCHPO Probable thymidylate synthase OS=Schizosaccharomyces pombe (strain 972 / ATCC 24843) GN=SPAC15E1.04 PE=3 SV=1	292	117.087	7.10536e-34	60	-3	1833	2114	0	101	195
TRINITY_DN6537_c0_g1	1	2489	198	19.77	75.76	sp|P87242|YC0H_SCHPO HD domain-containing protein C4G3.17 OS=Schizosaccharomyces pombe (strain 972 / ATCC 24843) GN=SPCC4G3.17 PE=3 SV=1	342	136.346	1.1923e-34	46.71	-2	1646	2137	0	37	186
TRINITY_DN9071_c0_g1	1	2468	689	22.85	22.5	sp|P87169|MAD1_SCHPO Spindle assembly checkpoint component mad1 OS=Schizosaccharomyces pombe (strain 972 / ATCC 24843) GN=mad1 PE=1 SV=1	210	85.5001	8.25815e-16	32.63	-2	11	574	0	498	652
TRINITY_DN7105_c0_g2	1	2428	199	19.89	77.89	sp|Q9CPW7|ZMAT2_MOUSE Zinc finger matrin-type protein 2 OS=Mus musculus GN=Zmat2 PE=2 SV=1	190	77.7962	1.73689e-14	35.4	-1	14	496	0	43	197
TRINITY_DN7528_c0_g1	1	2391	246	15.18	48.78	sp|Q6FL81|RPE_CANGA Ribulose-phosphate 3-epimerase OS=Candida glabrata (strain ATCC 2001 / CBS 138 / JCM 3761 / NBRC 0622 / NRRL Y-65) GN=RPE1 PE=3 SV=1	207	84.3445	1.00991e-30	42.98	-2	510	872	0	113	232
TRINITY_DN5299_c0_g1	1	2371	182	21.89	92.86	sp|Q6CA53|APT_YARLI Adenine phosphoribosyltransferase OS=Yarrowia lipolytica (strain CLIB 122 / E 150) GN=APT1 PE=3 SV=1	496	195.667	3.80405e-56	54.91	3	78	596	0	10	178
TRINITY_DN4717_c0_g1	1	2347	596	55.99	71.31	sp|W7LC91|FUM15_GIBM7 Cytochrome P450 monooxygenase FUM15 OS=Gibberella moniliformis (strain M3125 / FGSC 7600) GN=FUM15 PE=3 SV=1	330	131.724	1.24954e-30	27.75	-3	876	2189	0	50	474
TRINITY_DN4000_c0_g2	1	2319	919	85.51	74.21	sp|P30598|CHS1_USTMA Chitin synthase 1 OS=Ustilago maydis (strain 521 / FGSC 9021) GN=CHS1 PE=3 SV=3	2199	851.662	0	63.37	-2	9	1991	0	8	689
TRINITY_DN9279_c0_g1	1	2281	340	16.18	35.59	sp|Q09923|YAKC_SCHPO Aldo-keto reductase yakc [NADP(+)] OS=Schizosaccharomyces pombe (strain 972 / ATCC 24843) GN=yakc PE=1 SV=1	328	130.954	1.49784e-31	51.22	2	2	370	0	206	326
TRINITY_DN2767_c0_g1	1	2225	772	51.78	47.28	sp|Q8HY46|CPT1B_PIG Carnitine O-palmitoyltransferase 1, muscle isoform OS=Sus scrofa GN=CPT1B PE=2 SV=1	414	164.081	6.49062e-45	30.83	2	1025	2176	0	402	766
TRINITY_DN5077_c0_g1	1	2203	515	64.82	90.68	sp|D7UQ40|SOL5_ALTSO Bifunctional solanapyrone synthase OS=Alternaria solani GN=sol5 PE=1 SV=1	458	181.03	1.04091e-47	31.25	3	552	1979	0	48	514
TRINITY_DN3594_c0_g1	1	2185	330	6.59	14.55	sp|P50947|PHO23_YEAST Transcriptional regulatory protein PHO23 OS=Saccharomyces cerevisiae (strain ATCC 204508 / S288c) GN=PHO23 PE=1 SV=1	202	82.4185	1.29828e-15	58.33	3	630	773	0	282	329
TRINITY_DN8207_c0_g3	1	2151	592	76.99	90.03	sp|O60008|HSP60_PARBA Heat shock protein 60, mitochondrial OS=Paracoccidioides lutzii (strain ATCC MYA-826 / Pb01) GN=HSP60 PE=1 SV=1	2111	817.765	0	74.46	3	195	1850	0	40	572
TRINITY_DN6995_c1_g1	1	2136	266	43.82	96.99	sp|Q59093|ELH1_ACIAD 3-oxoadipate enol-lactonase 1 OS=Acinetobacter baylyi (strain ATCC 33305 / BD413 / ADP1) GN=pcaD PE=4 SV=2	245	98.9821	2.35166e-21	27.48	1	1018	1953	0	5	262
TRINITY_DN2725_c0_g2	1	2119	856	94.71	80.26	sp|Q01290|VPH1_NEUCR V-type proton ATPase subunit a OS=Neurospora crassa (strain ATCC 24698 / 74-OR23-1A / CBS 708.71 / DSM 1257 / FGSC 987) GN=vph-1 PE=3 SV=1	1847	716.072	0	52.89	-3	96	2102	0	155	841
TRINITY_DN8907_c0_g1	1	2103	166	7.7	32.53	sp|Q9D0W5|PPIL1_MOUSE Peptidyl-prolyl cis-trans isomerase-like 1 OS=Mus musculus GN=Ppil1 PE=1 SV=1	179	73.559	2.65362e-40	59.26	3	1827	1988	0	108	161
TRINITY_DN5885_c0_g1	1	2084	363	47.07	71.9	sp|Q01356|ARG13_NEUCR Amino-acid transporter arg-13 OS=Neurospora crassa (strain ATCC 24698 / 74-OR23-1A / CBS 708.71 / DSM 1257 / FGSC 987) GN=arg-13 PE=2 SV=1	209	85.1149	1.46069e-26	28.18	-3	235	1215	0	100	360
TRINITY_DN6708_c0_g1	1	2049	540	53	67.04	sp|P0CQ76|DBP2_CRYNJ ATP-dependent RNA helicase DBP2-A OS=Cryptococcus neoformans var. neoformans serotype D (strain JEC21 / ATCC MYA-565) GN=DBP2 PE=3 SV=1	1542	598.586	0	78.73	3	48	1133	0	59	420
TRINITY_DN5693_c2_g1	1	2031	611	96.01	91	sp|Q9H6U8|ALG9_HUMAN Alpha-1,2-mannosyltransferase ALG9 OS=Homo sapiens GN=ALG9 PE=1 SV=2	775	303.138	1.67821e-91	33.89	-3	65	2014	0	54	609
TRINITY_DN8607_c0_g5	1	2002	545	21.13	25.87	sp|Q8GTB6|THCAS_CANSA Tetrahydrocannabinolic acid synthase OS=Cannabis sativa PE=1 SV=1	126	53.1434	6.64192e-09	30.56	1	436	858	0	80	220
TRINITY_DN8168_c0_g1	1	1988	512	44.22	57.03	sp|Q59PT0|VATB_CANAL V-type proton ATPase subunit B OS=Candida albicans (strain SC5314 / ATCC MYA-2876) GN=VMA2 PE=3 SV=1	1261	490.345	0	78.5	-2	1004	1882	0	3	294
TRINITY_DN3915_c0_g1	1	1972	665	9.13	7.97	sp|Q557E7|CBLA_DICDI E3 ubiquitin-protein ligase cblA OS=Dictyostelium discoideum GN=cblA-1 PE=1 SV=1	132	55.4546	1.31959e-06	40	-1	80	259	0	613	665
TRINITY_DN6880_c0_g2	1	1897	628	40.48	42.83	sp|P30776|RAD21_SCHPO Cohesin subunit rad21 OS=Schizosaccharomyces pombe (strain 972 / ATCC 24843) GN=rad21 PE=1 SV=1	444	175.637	1.27962e-45	42.09	2	41	808	0	1	269
TRINITY_DN5867_c0_g1	1	1882	534	51.01	66.1	sp|Q9Z1A5|ULA1_RAT NEDD8-activating enzyme E1 regulatory subunit OS=Rattus norvegicus GN=Nae1 PE=1 SV=1	433	171.4	2.0833e-75	32.01	1	679	1638	0	165	517
TRINITY_DN6136_c1_g2	1	1869	643	79.45	67.5	sp|O13282|TAF5_SCHPO Transcription initiation factor TFIID subunit 5 OS=Schizosaccharomyces pombe (strain 972 / ATCC 24843) GN=taf5 PE=1 SV=1	637	249.98	7.70524e-72	34.52	-1	1	1485	0	34	467
TRINITY_DN8557_c1_g1	1	1854	186	21.36	65.59	sp|P0DN32|CUPR1_ARTBC Probable GPI-anchored cupredoxin ARB_05732-1 OS=Arthroderma benhamiae (strain ATCC MYA-4681 / CBS 112371) GN=ARB_05732-1 PE=1 SV=1	171	70.4774	1.99902e-12	31.06	-1	865	1260	0	4	125
TRINITY_DN4270_c0_g1	1	1842	1036	53.58	34.36	sp|Q76LT8|UBP48_RAT Ubiquitin carboxyl-terminal hydrolase 48 OS=Rattus norvegicus GN=Usp48 PE=1 SV=1	214	87.0409	2.26247e-16	23.86	-1	499	1485	0	498	853
TRINITY_DN9287_c0_g1	1	1828	581	49.07	47.68	sp|O94343|YHMA_SCHPO Uncharacterized MFS-type transporter C1271.10c OS=Schizosaccharomyces pombe (strain 972 / ATCC 24843) GN=SPBC1271.10c PE=1 SV=1	247	99.7525	1.13958e-20	24.34	-3	114	1010	0	4	280
TRINITY_DN8395_c0_g1	1	1778	508	76.77	89.76	sp|P0DPA7|PSIH_PSICU Cytochrome P450 monooxygenase psiH OS=Psilocybe cubensis GN=psiH PE=1 SV=1	694	271.937	1.30095e-81	35.13	-1	30	1394	0	51	506
TRINITY_DN9294_c1_g2	1	1769	488	60.03	65.37	sp|P38142|YB91_YEAST Probable metabolite transport protein YBR241C OS=Saccharomyces cerevisiae (strain ATCC 204508 / S288c) GN=YBR241C PE=1 SV=1	341	135.961	4.24762e-39	25.07	-3	580	1641	0	36	354
TRINITY_DN4053_c0_g1	1	1757	527	88.28	98.29	sp|P50999|TCPD_SCHPO T-complex protein 1 subunit delta OS=Schizosaccharomyces pombe (strain 972 / ATCC 24843) GN=cct4 PE=2 SV=2	1698	658.677	0	66.41	1	64	1614	0	10	527
TRINITY_DN8223_c0_g1	1	1744	422	23.91	34.6	sp|Q9UUH0|YKIC_SCHPO Uncharacterized protein C630.12 OS=Schizosaccharomyces pombe (strain 972 / ATCC 24843) GN=SPAC630.12 PE=3 SV=1	272	109.383	2.59323e-24	40.41	2	950	1366	0	199	344
TRINITY_DN8765_c1_g2	1	1733	1356	19.22	7.82	sp|Q00808|HETE1_PODAS Vegetative incompatibility protein HET-E-1 OS=Podospora anserina GN=HET-E1 PE=4 SV=1	127	53.5286	5.25628e-06	33.33	-2	1226	1558	0	1203	1308
TRINITY_DN5958_c0_g1	1	1687	539	13.69	14.47	sp|Q54VT8|GLPK_DICDI Probable glycerol kinase OS=Dictyostelium discoideum GN=gk PE=3 SV=1	163	67.3958	1.56675e-32	41.03	2	1037	1267	0	4	81
TRINITY_DN8902_c1_g1	1	1677	247	34.88	62.35	sp|P66782|Y1385_MYCBO Uncharacterized oxidoreductase Mb1385 OS=Mycobacterium bovis (strain ATCC BAA-935 / AF2122/97) GN=fabG2 PE=3 SV=1	183	75.0998	8.95376e-14	31.63	-3	95	679	0	91	244
TRINITY_DN8293_c0_g3	1	1666	768	57.08	39.97	sp|Q0CT11|CREB_ASPTN Probable ubiquitin carboxyl-terminal hydrolase creB OS=Aspergillus terreus (strain NIH 2624 / FGSC A1156) GN=creB PE=3 SV=2	868	338.961	9.34599e-105	53.77	-2	607	1557	0	174	480
TRINITY_DN8769_c1_g2	1	1654	269	22.85	36.8	sp|C4K014|MEP1_UNCRE Extracellular metalloprotease UREG_07765 OS=Uncinocarpus reesii (strain UAMH 1704) GN=UREG_07765 PE=3 SV=1	182	74.7146	3.28171e-25	39.53	-3	351	728	0	146	244
TRINITY_DN7825_c0_g1	1	1642	1184	51.52	22.3	sp|P17120|BIMC_EMENI Kinesin-like protein bimC OS=Emericella nidulans (strain FGSC A4 / ATCC 38163 / CBS 112.46 / NRRL 194 / M139) GN=bimC PE=2 SV=2	450	177.948	1.1868e-45	43.71	-3	795	1640	0	370	633
TRINITY_DN8284_c0_g1	1	1630	404	41.78	52.23	sp|Q9Y899|KCC1B_EMEND Calcium/calmodulin-dependent protein kinase cmkB OS=Emericella nidulans GN=cmkB PE=1 SV=1	827	323.168	3.62865e-103	64.76	-1	2	682	0	6	216
TRINITY_DN4887_c0_g1	1	1620	247	30.93	53.44	sp|O13767|YE95_SCHPO Uncharacterized protein C17A5.05c OS=Schizosaccharomyces pombe (strain 972 / ATCC 24843) GN=SPAC17A5.05c PE=4 SV=1	193	78.9518	1.63813e-15	34.73	3	180	680	0	74	205
TRINITY_DN3717_c0_g1	1	1612	1347	34.8	11.88	sp|O74881|BTB1_SCHPO BTB/POZ domain-containing protein 1 OS=Schizosaccharomyces pombe (strain 972 / ATCC 24843) GN=btb1 PE=1 SV=1	177	72.7886	5.07594e-12	29.95	1	1030	1590	0	670	829
TRINITY_DN10209_c0_g1	1	1590	587	83.02	78.19	sp|P07921|LACP_KLULA Lactose permease OS=Kluyveromyces lactis (strain ATCC 8585 / CBS 2359 / DSM 70799 / NBRC 1267 / NRRL Y-1140 / WM37) GN=LAC12 PE=3 SV=1	569	223.787	1.70613e-63	30.24	1	1	1320	0	125	583
TRINITY_DN8298_c0_g5	1	1568	390	27.93	35.9	sp|Q2MHE4|HT1_ARATH Serine/threonine-protein kinase HT1 OS=Arabidopsis thaliana GN=HT1 PE=1 SV=1	221	89.7373	5.68298e-18	34.69	1	73	510	0	203	342
TRINITY_DN7873_c0_g2	1	1561	559	70.92	66.01	sp|Q01772|GLOX_PHACH Aldehyde oxidase GLOX OS=Phanerochaete chrysosporium GN=GLX PE=1 SV=1	853	333.183	2.498e-105	45.48	-1	410	1516	0	188	556
TRINITY_DN3203_c0_g1	1	1552	338	34.99	53.85	sp|B2G5Z4|GPDA_LACRJ Glycerol-3-phosphate dehydrogenase [NAD(P)+] OS=Lactobacillus reuteri (strain JCM 1112) GN=gpsA PE=3 SV=1	403	159.844	7.18536e-59	45.05	1	688	1230	0	154	335
TRINITY_DN5820_c0_g5	1	1544	2841	52.27	9.19	sp|Q04690|NF1_MOUSE Neurofibromin OS=Mus musculus GN=Nf1 PE=1 SV=1	218	88.5817	6.28368e-17	24.73	-1	144	950	0	138	398
TRINITY_DN8689_c0_g3	1	1534	427	73.34	85.95	sp|O14370|BCA1_SCHPO Branched-chain-amino-acid aminotransferase, mitochondrial OS=Schizosaccharomyces pombe (strain 972 / ATCC 24843) GN=eca39 PE=1 SV=3	808	315.849	1.84711e-100	43.35	1	238	1362	0	57	423
TRINITY_DN5365_c0_g1	1	1525	523	89.11	92.35	sp|Q9UTQ7|ARP9_SCHPO SWI/SNF and RSC complexes subunit arp9 OS=Schizosaccharomyces pombe (strain 972 / ATCC 24843) GN=arp9 PE=1 SV=1	311	124.405	2.63924e-29	25.94	-2	136	1494	0	37	519
TRINITY_DN4901_c0_g2	1	1506	1469	73.31	20.76	sp|Q9P7V2|ABC4_SCHPO ATP-binding cassette transporter abc4 OS=Schizosaccharomyces pombe (strain 972 / ATCC 24843) GN=abc4 PE=3 SV=1	289	115.931	1.35002e-28	26.68	-1	247	1350	0	176	480
TRINITY_DN6775_c0_g1	1	1496	773	44.92	25.87	sp|O81472|MP3K2_ARATH Mitogen-activated protein kinase kinase kinase 9 OS=Arabidopsis thaliana GN=MEKK2 PE=1 SV=1	148	61.6178	9.6998e-09	26.84	-1	267	938	0	520	719
TRINITY_DN4163_c0_g1	1	1484	337	52.36	84.87	sp|A0A097ZPD4|ANDH_EMEVA Oxidoreductase andH OS=Emericella variicolor GN=andH PE=1 SV=1	233	94.3597	6.59283e-20	27.55	-2	263	1039	0	38	323
TRINITY_DN7704_c1_g1	1	1475	372	66.51	88.17	sp|Q8K0C9|GMDS_MOUSE GDP-mannose 4,6 dehydratase OS=Mus musculus GN=Gmds PE=1 SV=1	1184	460.685	7.76113e-158	66.77	3	381	1361	0	41	368
TRINITY_DN6737_c0_g3	1	1466	396	41.75	54.04	sp|Q99161|SEC62_YARLI Translocation protein SEC62 OS=Yarrowia lipolytica (strain CLIB 122 / E 150) GN=SEC62 PE=3 SV=2	436	172.555	1.12414e-46	43.72	-3	445	1056	0	24	237
TRINITY_DN7146_c0_g1	1	1432	630	94.48	71.11	sp|P0CM60|VAC8_CRYNJ Vacuolar protein 8 OS=Cryptococcus neoformans var. neoformans serotype D (strain JEC21 / ATCC MYA-565) GN=VAC8 PE=3 SV=1	1911	740.725	0	86.95	-1	2	1354	0	1	448
TRINITY_DN7375_c0_g1	1	1424	255	39.4	71.76	sp|P38117|ETFB_HUMAN Electron transfer flavoprotein subunit beta OS=Homo sapiens GN=ETFB PE=1 SV=3	500	197.208	2.11227e-68	56.61	3	36	596	0	4	186
TRINITY_DN6686_c0_g3	1	1413	1542	53.08	15.5	sp|O74208|PDH1_CANGA ATP-binding cassette transporter CGR1 OS=Candida glabrata (strain ATCC 2001 / CBS 138 / JCM 3761 / NBRC 0622 / NRRL Y-65) GN=PDH1 PE=3 SV=3	628	246.514	3.68066e-97	50.79	-2	633	1382	0	921	1159
TRINITY_DN5487_c0_g1	1	1404	334	12.61	17.37	sp|Q566L8|MAT2B_XENTR Methionine adenosyltransferase 2 subunit beta OS=Xenopus tropicalis GN=mat2b PE=2 SV=1	158	65.4698	9.6544e-28	59.32	-2	570	746	0	137	194
TRINITY_DN7268_c0_g1	1	1393	412	30.58	34.22	sp|O60884|DNJA2_HUMAN DnaJ homolog subfamily A member 2 OS=Homo sapiens GN=DNAJA2 PE=1 SV=1	325	129.798	4.96175e-46	44.37	-3	273	698	0	218	358
TRINITY_DN8889_c1_g5	1	1386	831	64.07	35.62	sp|P50998|AMPD_SCHPO AMP deaminase OS=Schizosaccharomyces pombe (strain 972 / ATCC 24843) GN=ada1 PE=1 SV=3	1179	458.759	8.28495e-180	70.95	2	470	1357	0	425	720
TRINITY_DN3546_c0_g1	1	1379	215	46.77	99.53	sp|P21734|UBC1_YEAST Ubiquitin-conjugating enzyme E2 1 OS=Saccharomyces cerevisiae (strain ATCC 204508 / S288c) GN=UBC1 PE=1 SV=1	582	228.794	2.50005e-70	52.04	-3	685	1329	0	2	215
TRINITY_DN5772_c0_g1	1	1361	759	92.36	53.36	sp|O14123|NAH2_SCHPO Probable Na(+)/H(+) antiporter C3A11.09 OS=Schizosaccharomyces pombe (strain 972 / ATCC 24843) GN=sod22 PE=1 SV=1	458	181.03	2.72408e-48	32.86	3	3	1259	0	155	559
TRINITY_DN7906_c0_g1	1	1306	346	43.87	56.65	sp|A2VE14|SAE1_BOVIN SUMO-activating enzyme subunit 1 OS=Bos taurus GN=SAE1 PE=2 SV=1	348	138.658	2.03852e-41	35.68	-2	565	1137	0	11	206
TRINITY_DN6742_c0_g2	1	1290	247	20.7	31.17	sp|Q87S45|CUTC_VIBPA Copper homeostasis protein CutC OS=Vibrio parahaemolyticus serotype O3:K6 (strain RIMD 2210633) GN=cutC PE=3 SV=1	104	44.669	2.49125e-06	37.08	3	267	533	0	136	212
TRINITY_DN0_c0_g1	1	1265	356	74.94	86.8	sp|P54641|VA0D_DICDI V-type proton ATPase subunit d OS=Dictyostelium discoideum GN=vatD-1 PE=1 SV=2	1015	395.586	1.04807e-133	58.36	-3	130	1077	0	48	356
TRINITY_DN2956_c0_g2	1	1243	129	30.65	98.45	sp|P40046|VTC1_YEAST Vacuolar transporter chaperone 1 OS=Saccharomyces cerevisiae (strain ATCC 204508 / S288c) GN=VTC1 PE=1 SV=3	395	156.762	2.0539e-44	70.87	2	35	415	0	1	127
TRINITY_DN6068_c0_g1	1	1235	755	36.68	20.26	sp|P14002|BGLB_CLOTH Thermostable beta-glucosidase B OS=Clostridium thermocellum (strain ATCC 27405 / DSM 1237 / NBRC 103400 / NCIMB 10682 / NRRL B-4536 / VPI 7372) GN=bglB PE=1 SV=2	302	120.939	3.69438e-28	41.4	-3	700	1152	0	529	681
TRINITY_DN9047_c1_g2	1	1227	863	67.73	32.44	sp|O13864|IMB1_SCHPO Importin subunit beta-1 OS=Schizosaccharomyces pombe (strain 972 / ATCC 24843) GN=kap95 PE=3 SV=1	646	253.447	4.40903e-74	45.36	2	53	883	0	580	859
TRINITY_DN9312_c0_g4	1	1214	648	41.02	22.99	sp|A1D9S3|AGALD_NEOFI Probable alpha-galactosidase D OS=Neosartorya fischeri (strain ATCC 1020 / DSM 3700 / CBS 544.65 / FGSC A1164 / JCM 1740 / NRRL 181 / WB 181) GN=aglD PE=3 SV=1	370	147.132	2.42093e-37	45.24	-1	18	515	0	23	171
TRINITY_DN7327_c0_g2	1	1177	2280	98.9	17.63	sp|P78820|ACAC_SCHPO Acetyl-CoA carboxylase OS=Schizosaccharomyces pombe (strain 972 / ATCC 24843) GN=cut6 PE=1 SV=2	806	315.079	6.99664e-94	43.31	1	7	1170	0	1174	1575
TRINITY_DN5099_c1_g2	1	1171	948	85.57	38.19	sp|P0CQ94|DBP7_CRYNJ ATP-dependent RNA helicase DBP7 OS=Cryptococcus neoformans var. neoformans serotype D (strain JEC21 / ATCC MYA-565) GN=DBP7 PE=3 SV=1	806	315.079	1.66485e-96	54.32	2	104	1105	0	165	526
TRINITY_DN5469_c0_g1	1	1163	505	83.58	63.17	sp|Q5ZMA2|PRP19_CHICK Pre-mRNA-processing factor 19 OS=Gallus gallus GN=PRPF19 PE=1 SV=1	401	159.073	6.59882e-42	31.85	-2	80	1051	0	171	489
TRINITY_DN7923_c0_g2	1	1155	394	40.26	34.01	sp|Q09709|YA32_SCHPO Uncharacterized protein C18B11.02c OS=Schizosaccharomyces pombe (strain 972 / ATCC 24843) GN=SPAC18B11.02c PE=3 SV=1	221	89.7373	6.19164e-38	34.78	-3	269	733	0	64	197
TRINITY_DN8918_c1_g7	1	1149	942	47	18.9	sp|Q99127|CHS4_USTMA Chitin synthase 4 OS=Ustilago maydis (strain 521 / FGSC 9021) GN=CHS4 PE=3 SV=2	677	265.388	2.44771e-78	66.67	1	610	1149	0	185	362
TRINITY_DN4045_c0_g1	1	1144	641	99.91	59.44	sp|Q9UTJ7|SDHA_SCHPO Probable succinate dehydrogenase [ubiquinone] flavoprotein subunit, mitochondrial OS=Schizosaccharomyces pombe (strain 972 / ATCC 24843) GN=sdh1 PE=2 SV=1	1823	706.827	0	85.56	1	1	1143	0	114	494
TRINITY_DN5873_c0_g1	1	1131	211	65.52	79.62	sp|P36586|YPT5_SCHPO GTP-binding protein ypt5 OS=Schizosaccharomyces pombe (strain 972 / ATCC 24843) GN=ypt5 PE=1 SV=1	354	140.969	5.66149e-40	42.57	2	239	979	0	44	211
TRINITY_DN6744_c0_g2	1	1122	975	31.02	11.9	sp|P09440|C1TM_YEAST C-1-tetrahydrofolate synthase, mitochondrial OS=Saccharomyces cerevisiae (strain ATCC 204508 / S288c) GN=MIS1 PE=1 SV=1	350	139.428	8.01192e-55	55.17	3	774	1121	0	156	271
TRINITY_DN3804_c0_g3	1	1101	323	17.44	19.81	sp|Q91994|OTX1B_DANRE Homeobox protein OTX1 B OS=Danio rerio GN=otx1b PE=2 SV=1	140	58.5362	2.47399e-08	42.19	3	618	809	0	30	93
TRINITY_DN6087_c0_g1	1	1073	529	54.52	37.24	sp|A1CFL6|PATI_ASPCL Cytochrome P450 monooxygenase patI OS=Aspergillus clavatus (strain ATCC 1007 / CBS 513.65 / DSM 816 / NCTC 3887 / NRRL 1) GN=patI PE=1 SV=2	205	83.5741	2.95485e-16	26.87	-3	37	621	0	129	325
TRINITY_DN573_c0_g2	1	1060	322	76.42	82.92	sp|Q84V25|ENOXE_FRAAN 2-methylene-furan-3-one reductase OS=Fragaria ananassa GN=EO PE=1 SV=1	287	115.161	1.11607e-27	34.52	-2	46	855	0	10	276
TRINITY_DN7993_c0_g3	1	1045	1935	61.72	10.8	sp|P0CM30|ATG2_CRYNJ Autophagy-related protein 2 OS=Cryptococcus neoformans var. neoformans serotype D (strain JEC21 / ATCC MYA-565) GN=ATG2 PE=3 SV=1	231	93.5893	2.31412e-19	30.18	1	400	1044	0	907	1115
TRINITY_DN8333_c0_g3	1	1038	187	32.66	51.34	sp|P0CR88|TIM22_CRYNJ Mitochondrial import inner membrane translocase subunit TIM22 OS=Cryptococcus neoformans var. neoformans serotype D (strain JEC21 / ATCC MYA-565) GN=TIM22 PE=3 SV=1	292	117.087	4.78463e-34	53.98	-1	421	759	0	63	158
TRINITY_DN4542_c0_g3	1	1033	373	56.05	56.84	sp|P04963|PRXC_LEPFU Chloroperoxidase OS=Leptoxyphium fumago GN=CPO PE=1 SV=3	172	70.8626	2.73345e-12	28.64	-1	326	904	0	37	248
TRINITY_DN2009_c0_g1	1	1020	704	100	48.01	sp|P23980|PMA2_SOLLC Plasma membrane ATPase 2 (Fragment) OS=Solanum lycopersicum GN=LHA2 PE=3 SV=1	1035	403.29	2.78457e-133	60.23	1	1	1020	0	135	472
TRINITY_DN8606_c0_g1	1	1015	211	60.89	99.05	sp|A8XGH1|RPAB1_CAEBR DNA-directed RNA polymerases I, II, and III subunit RPABC1 OS=Caenorhabditis briggsae GN=rpb-5 PE=3 SV=1	561	220.705	9.07872e-69	49.28	-2	373	990	0	1	209
TRINITY_DN3509_c0_g2	1	996	734	68.67	31.06	sp|P0CL92|ATM1_CRYNJ Iron-sulfur clusters transporter ATM1, mitochondrial OS=Cryptococcus neoformans var. neoformans serotype D (strain JEC21 / ATCC MYA-565) GN=ATM1 PE=3 SV=1	849	331.643	1.76286e-105	66.23	-2	3	686	0	111	338
TRINITY_DN3102_c0_g1	1	985	317	90.15	85.49	sp|Q9UUG1|RPF2_SCHPO Ribosome production factor 2 homolog OS=Schizosaccharomyces pombe (strain 972 / ATCC 24843) GN=SPAC926.08c PE=1 SV=1	569	223.787	1.02521e-68	41.55	2	98	985	0	6	276
TRINITY_DN4225_c0_g2	1	956	134	24.79	58.21	sp|O94238|RL14_SCHPO 60S ribosomal protein L14 OS=Schizosaccharomyces pombe (strain 972 / ATCC 24843) GN=rpl14 PE=2 SV=1	136	56.9954	4.55758e-11	41.77	3	495	731	0	37	114
TRINITY_DN4878_c0_g1	1	945	499	97.78	61.12	sp|A0A161CLJ6|MRR1_MONRU Citrinin biosynthesis cluster MFS transporter mrr1 OS=Monascus ruber GN=mrr1 PE=3 SV=1	531	209.149	3.0389e-61	40.45	3	9	932	0	95	399
TRINITY_DN9007_c3_g3	1	930	294	92.58	91.5	sp|O74306|RL5B_SCHPO 60S ribosomal protein L5-B OS=Schizosaccharomyces pombe (strain 972 / ATCC 24843) GN=rpl502 PE=2 SV=1	928	362.073	2.95342e-123	63.89	-2	69	929	0	20	288
TRINITY_DN6582_c0_g1	1	925	114	8.11	21.93	sp|Q6C6M5|DPB3_YARLI DNA polymerase epsilon subunit C OS=Yarrowia lipolytica (strain CLIB 122 / E 150) GN=DPB3 PE=3 SV=1	91	39.6614	5.94402e-06	64	-1	563	637	0	15	39
TRINITY_DN6865_c0_g1	1	907	552	81.37	41.3	sp|Q0DV32|4CLL1_ORYSJ 4-coumarate--CoA ligase-like 1 OS=Oryza sativa subsp. japonica GN=4CLL1 PE=2 SV=2	460	181.8	6.63217e-51	38.8	1	10	747	0	274	501
TRINITY_DN3288_c0_g1	1	901	166	29.97	51.2	sp|Q9CRB8|MTFP1_MOUSE Mitochondrial fission process protein 1 OS=Mus musculus GN=Mtfp1 PE=1 SV=1	117	49.6766	4.09676e-06	35.56	2	218	487	0	20	104
TRINITY_DN4820_c0_g1	1	892	412	18.83	13.11	sp|O43029|FAP1_SCHPO L-pipecolate oxidase OS=Schizosaccharomyces pombe (strain 972 / ATCC 24843) GN=fap1 PE=1 SV=1	140	58.5362	2.08936e-08	55.36	2	5	172	0	204	257
TRINITY_DN2477_c0_g1	1	887	509	61.89	35.17	sp|O42916|ALE1_SCHPO Lysophospholipid acyltransferase OS=Schizosaccharomyces pombe (strain 972 / ATCC 24843) GN=ale1 PE=1 SV=1	270	108.612	8.58771e-40	34.97	3	339	887	0	97	275
TRINITY_DN6017_c0_g3	1	871	1091	87.14	23.65	sp|P13587|ATN1_YEAST Sodium transport ATPase 1 OS=Saccharomyces cerevisiae (strain ATCC 204508 / S288c) GN=ENA1 PE=1 SV=1	565	222.246	5.52075e-64	42.64	-2	112	870	0	795	1052
TRINITY_DN6898_c1_g1	1	867	481	51.9	31.19	sp|Q82P90|IABF_STRAW Extracellular exo-alpha-(1-&gt;5)-L-arabinofuranosidase OS=Streptomyces avermitilis (strain ATCC 31267 / DSM 46492 / JCM 5070 / NBRC 14893 / NCIMB 12804 / NRRL 8165 / MA-4680) GN=Araf43A PE=1 SV=1	227	92.0485	1.49914e-19	38.31	2	23	472	0	100	249
TRINITY_DN4893_c0_g3	1	851	210	76.15	96.67	sp|A9I847|PDXH_BORPD Pyridoxine/pyridoxamine 5&apos;-phosphate oxidase OS=Bordetella petrii (strain ATCC BAA-461 / DSM 12804 / CCUG 43448) GN=pdxH PE=3 SV=1	550	216.468	7.9017e-68	49.54	-1	66	713	0	8	210
TRINITY_DN3571_c1_g2	1	828	516	35.14	15.31	sp|Q8R5G2|MUTYH_RAT Adenine DNA glycosylase OS=Rattus norvegicus GN=Mutyh PE=2 SV=1	211	85.8853	2.19639e-31	42.27	3	534	824	0	125	203
TRINITY_DN2651_c0_g1	1	823	1199	33.9	7.76	sp|Q28205|TBCD_BOVIN Tubulin-specific chaperone D OS=Bos taurus GN=TBCD PE=1 SV=1	272	109.383	1.40081e-37	54.84	-1	263	541	0	462	554
TRINITY_DN4506_c0_g1	1	808	240	61.63	69.17	sp|O94584|PSS_SCHPO CDP-diacylglycerol--serine O-phosphatidyltransferase OS=Schizosaccharomyces pombe (strain 972 / ATCC 24843) GN=pps1 PE=1 SV=2	474	187.193	3.11833e-56	55.95	1	232	729	0	41	206
TRINITY_DN4608_c0_g1	1	804	442	92.54	51.36	sp|P31115|PUS3_YEAST tRNA pseudouridine(38/39) synthase OS=Saccharomyces cerevisiae (strain ATCC 204508 / S288c) GN=DEG1 PE=1 SV=1	384	152.525	3.74268e-41	35.82	-3	2	745	0	22	248
TRINITY_DN4446_c0_g2	1	794	475	44.96	24.42	sp|O54161|EABF_STRCO Extracellular exo-alpha-L-arabinofuranosidase OS=Streptomyces coelicolor (strain ATCC BAA-471 / A3(2) / M145) GN=abfB PE=1 SV=1	141	58.9214	1.23589e-08	33.33	-2	230	586	0	49	164
TRINITY_DN6836_c0_g1	1	779	2305	32.73	3.69	sp|Q4PFV5|DPOE_USTMA DNA polymerase epsilon catalytic subunit A OS=Ustilago maydis (strain 521 / FGSC 9021) GN=POL2 PE=3 SV=1	292	117.087	2.04895e-45	52.94	2	164	418	0	52	136
TRINITY_DN5640_c0_g4	1	760	1221	81.32	16.87	sp|Q4PGM6|RSE1_USTMA Pre-mRNA-splicing factor RSE1 OS=Ustilago maydis (strain 521 / FGSC 9021) GN=RSE1 PE=3 SV=1	834	325.865	3.19542e-101	74.76	2	140	757	0	2	207
TRINITY_DN4922_c1_g1	1	750	136	49.2	90.44	sp|P0CU28|RS24_CHATD 40S ribosomal protein S24 OS=Chaetomium thermophilum (strain DSM 1495 / CBS 144.50 / IMI 039719) GN=CTHT_0041970.2 PE=1 SV=1	374	148.673	5.42965e-43	68.29	-3	203	571	0	2	124
TRINITY_DN4810_c0_g2	1	717	628	76.99	26.11	sp|Q08641|AB140_YEAST tRNA(Thr) (cytosine(32)-N(3))-methyltransferase OS=Saccharomyces cerevisiae (strain ATCC 204508 / S288c) GN=ABP140 PE=1 SV=3	442	174.866	5.79446e-49	47.57	-3	41	592	0	429	592
TRINITY_DN5817_c0_g1	1	713	182	52.17	71.98	sp|Q9UT87|IMG1_SCHPO 54S ribosomal protein subunit img1, mitochondrial OS=Schizosaccharomyces pombe (strain 972 / ATCC 24843) GN=img1 PE=3 SV=1	139	58.151	2.48399e-09	33.59	-3	205	576	0	28	158
TRINITY_DN3049_c0_g1	1	705	237	20.85	20.68	sp|Q10153|PIS_SCHPO CDP-diacylglycerol--inositol 3-phosphatidyltransferase OS=Schizosaccharomyces pombe (strain 972 / ATCC 24843) GN=pis1 PE=3 SV=2	190	77.7962	1.07749e-26	67.35	3	3	149	0	70	118
TRINITY_DN5490_c0_g1	1	679	137	67.6	70.8	sp|Q21828|MPC1_CAEEL Probable mitochondrial pyruvate carrier 1 OS=Caenorhabditis elegans GN=R07E5.13 PE=3 SV=2	251	101.293	4.46508e-25	41.18	-3	186	644	0	9	105
TRINITY_DN6699_c0_g1	1	675	749	32.44	9.75	sp|Q9C0V4|YOM2_SCHPO Uncharacterized protein PB7E8.02 OS=Schizosaccharomyces pombe (strain 972 / ATCC 24843) GN=SPBPB7E8.02 PE=4 SV=1	298	119.398	4.04279e-29	67.12	2	2	220	0	659	731
TRINITY_DN2983_c0_g1	1	667	1883	55.77	6.64	sp|Q4PF83|NTE1_USTMA Lysophospholipase NTE1 OS=Ustilago maydis (strain 521 / FGSC 9021) GN=NTE1 PE=3 SV=1	451	178.333	4.83673e-49	62.4	-3	258	629	0	1702	1826
TRINITY_DN4623_c0_g1	1	663	594	85.52	30.3	sp|Q3L1D1|PDH1_AGABI Pyranose dehydrogenase OS=Agaricus bisporus GN=pdh1 PE=1 SV=1	208	84.7297	2.02686e-17	29.15	-1	91	657	0	415	594
TRINITY_DN4742_c0_g1	1	642	570	57.94	16.49	sp|C5FSW4|XKS1_ARTOC Probable D-xylulose kinase A OS=Arthroderma otae (strain ATCC MYA-4605 / CBS 113480) GN=xkiA PE=2 SV=1	116	49.2914	8.55797e-06	24.8	3	270	641	0	4	97
TRINITY_DN8006_c0_g2	1	638	851	50.78	11.87	sp|O14031|PGT1_SCHPO Glutathione transporter 1 OS=Schizosaccharomyces pombe (strain 972 / ATCC 24843) GN=pgt1 PE=1 SV=1	295	118.242	1.14457e-28	49.07	1	46	369	0	747	847
TRINITY_DN697_c0_g1	1	633	1034	65.88	13.44	sp|F4JT76|VPS54_ARATH Vacuolar protein sorting-associated protein 54, chloroplastic OS=Arabidopsis thaliana GN=VPS54 PE=1 SV=1	148	61.6178	9.31076e-10	25.9	-1	4	420	0	564	702
TRINITY_DN5611_c0_g2	1	621	274	28.02	21.17	sp|Q4PEN0|FER4_USTMA Enoyl-CoA isomerase/hydratase fer4 OS=Ustilago maydis (strain 521 / FGSC 9021) GN=fer4 PE=1 SV=1	165	68.1662	1.19129e-12	60.34	-2	447	620	0	217	274
TRINITY_DN3147_c0_g1	1	614	419	90.88	44.39	sp|Q9USW3|YHZ7_SCHPO Probable glycosidase C21B10.07 OS=Schizosaccharomyces pombe (strain 972 / ATCC 24843) GN=SPBC21B10.07 PE=3 SV=1	359	142.895	1.12875e-38	46.32	2	2	559	0	232	417
TRINITY_DN4483_c0_g1	1	595	505	46.39	17.43	sp|Q8H1P9|MB3R3_ARATH Transcription factor MYB3R-3 OS=Arabidopsis thaliana GN=MYB3R3 PE=1 SV=1	162	67.0106	3.34988e-19	40.86	-3	234	509	0	76	163
TRINITY_DN576_c0_g2	1	573	482	70.68	26.14	sp|Q9FVW4|RENT3_ARATH Regulator of nonsense transcripts UPF3 OS=Arabidopsis thaliana GN=UPF3 PE=1 SV=1	218	88.5817	4.23539e-19	35.56	-2	15	419	0	4	129
TRINITY_DN1405_c0_g1	1	568	1721	98.77	10.92	sp|Q15811|ITSN1_HUMAN Intersectin-1 OS=Homo sapiens GN=ITSN1 PE=1 SV=3	142	59.3066	4.23e-09	28.7	3	6	566	0	1392	1579
TRINITY_DN5146_c0_g2	1	561	413	97.86	44.31	sp|Q2UC58|SSN3_ASPOR Serine/threonine-protein kinase SSN3 OS=Aspergillus oryzae (strain ATCC 42149 / RIB 40) GN=ssn3 PE=3 SV=2	719	281.567	4.47249e-92	68.31	3	9	557	0	85	267
TRINITY_DN6002_c0_g1	1	554	174	89.89	93.1	sp|Q9Y7J4|ARPC3_SCHPO Actin-related protein 2/3 complex subunit 3 OS=Schizosaccharomyces pombe (strain 972 / ATCC 24843) GN=arc3 PE=1 SV=1	491	193.741	7.39278e-61	56.63	-2	47	544	0	13	174
TRINITY_DN4821_c0_g1	1	537	958	79.33	14.82	sp|Q99MT2|MSH4_MOUSE MutS protein homolog 4 OS=Mus musculus GN=Msh4 PE=2 SV=1	157	65.0846	4.35721e-11	31.13	2	110	535	0	126	267
TRINITY_DN6441_c0_g2	1	525	980	48.57	8.98	sp|O75005|SYV_SCHPO Valine--tRNA ligase OS=Schizosaccharomyces pombe (strain 972 / ATCC 24843) GN=vas2 PE=3 SV=1	297	119.013	2.40196e-29	63.64	-3	2	256	0	74	161
TRINITY_DN5526_c0_g2	1	516	493	41.86	14.6	sp|P0CR62|SNX4_CRYNJ Sorting nexin-4 OS=Cryptococcus neoformans var. neoformans serotype D (strain JEC21 / ATCC MYA-565) GN=SNX4 PE=3 SV=1	269	108.227	2.22223e-26	65.28	-2	3	218	0	107	178
TRINITY_DN4896_c0_g3	1	495	538	90.91	27.88	sp|Q84XU2|PPP5_ARATH Serine/threonine-protein phosphatase 5 OS=Arabidopsis thaliana GN=PAPP5 PE=1 SV=1	405	160.614	4.22767e-45	49.33	2	38	487	0	226	375
TRINITY_DN3454_c0_g1	1	468	501	95.51	29.54	sp|Q51342|PUR1_PSEAE Amidophosphoribosyltransferase OS=Pseudomonas aeruginosa (strain ATCC 15692 / DSM 22644 / CIP 104116 / JCM 14847 / LMG 12228 / 1C / PRS 101 / PAO1) GN=purF PE=3 SV=3	463	182.956	9.78022e-54	58	-1	22	468	0	226	373
TRINITY_DN2927_c0_g1	1	430	519	73.95	21	sp|Q9P6J7|YHD3_SCHPO Uncharacterized MFS-type transporter C1683.03c OS=Schizosaccharomyces pombe (strain 972 / ATCC 24843) GN=SPBC1683.03c PE=3 SV=1	174	71.633	1.11505e-13	37.61	3	99	416	0	83	191
TRINITY_DN3643_c0_g1	1	427	370	85.01	30.27	sp|Q9Y617|SERC_HUMAN Phosphoserine aminotransferase OS=Homo sapiens GN=PSAT1 PE=1 SV=2	313	125.176	2.82406e-33	52.07	-3	3	365	0	6	117
TRINITY_DN4038_c0_g1	1	407	551	68.55	13.25	sp|Q08977|YP260_YEAST UPF0662 protein YPL260W OS=Saccharomyces cerevisiae (strain ATCC 204508 / S288c) GN=YPL260W PE=1 SV=1	179	73.559	2.03446e-14	43.01	-2	128	406	0	437	509
TRINITY_DN2996_c0_g2	1	401	1515	94.26	8.38	sp|P39109|YCFI_YEAST Metal resistance protein YCF1 OS=Saccharomyces cerevisiae (strain ATCC 204508 / S288c) GN=YCF1 PE=1 SV=2	300	120.168	3.03962e-30	50.39	-2	2	379	0	1227	1353
TRINITY_DN3902_c0_g1	1	396	351	84.85	33.33	sp|P78723|PEX14_PICAN Peroxisomal membrane protein PER10 OS=Pichia angusta GN=PEX14 PE=3 SV=1	190	77.7962	1.83287e-16	41.03	-3	41	376	0	8	124
TRINITY_DN2113_c0_g3	1	388	731	92.78	16.01	sp|Q9HDY1|ASE1_SCHPO Anaphase spindle elongation protein 1 OS=Schizosaccharomyces pombe (strain 972 / ATCC 24843) GN=ase1 PE=1 SV=1	186	76.2554	2.66998e-15	37.5	2	2	361	0	350	466
TRINITY_DN1518_c0_g2	1	376	554	98.94	21.84	sp|Q9C101|YKT8_SCHPO Uncharacterized MFS-type transporter PB1E7.08c OS=Schizosaccharomyces pombe (strain 972 / ATCC 24843) GN=SPAPB1E7.08c PE=1 SV=1	161	66.6254	3.2343e-12	35.48	-1	2	373	0	295	415
TRINITY_DN3525_c0_g2	1	371	595	74.39	14.62	sp|V5NDL4|PDH1_AGACM Pyranose dehydrogenase OS=Agaricus campestris GN=pdh1 PE=1 SV=1	168	69.3218	4.18123e-13	45.74	-2	68	343	0	199	285
TRINITY_DN3299_c0_g2	1	369	178	56.1	38.76	sp|P0C1I3|PPIH_RHIO9 Peptidyl-prolyl cis-trans isomerase H OS=Rhizopus delemar (strain RA 99-880 / ATCC MYA-4621 / FGSC 9543 / NRRL 43880) GN=cyp7 PE=3 SV=1	317	126.716	1.04862e-35	85.51	3	3	209	0	110	178
TRINITY_DN5850_c0_g1	1	332	226	85.84	34.07	sp|Q09893|YAI5_SCHPO Uncharacterized protein C24B11.05 OS=Schizosaccharomyces pombe (strain 972 / ATCC 24843) GN=SPAC24B11.05 PE=3 SV=1	151	62.7734	9.06961e-12	35.42	-2	5	289	0	4	80
TRINITY_DN6962_c0_g1	1	327	565	83.49	16.11	sp|B2VIF2|MAO1_ERWT9 NAD-dependent malic enzyme OS=Erwinia tasmaniensis (strain DSM 17950 / CIP 109463 / Et1/99) GN=maeA PE=3 SV=1	313	125.176	3.64323e-33	61.54	-2	3	275	0	183	273
TRINITY_DN9299_c0_g4	1	325	177	94.15	55.37	sp|O94578|YQ75_SCHPO Uncharacterized protein C1442.05c OS=Schizosaccharomyces pombe (strain 972 / ATCC 24843) GN=SPCC1442.05c PE=4 SV=1	119	50.447	1.45251e-07	27.45	-3	3	308	0	67	164
TRINITY_DN6250_c0_g3	1	320	606	83.44	14.69	sp|B0CQL7|PESC_LACBS Pescadillo homolog OS=Laccaria bicolor (strain S238N-H82 / ATCC MYA-4686) GN=NOP7 PE=3 SV=1	430	170.244	2.72241e-49	80.9	1	52	318	0	122	210
TRINITY_DN6639_c0_g2	1	310	310	56.13	18.71	sp|P50085|PHB2_YEAST Prohibitin-2 OS=Saccharomyces cerevisiae (strain ATCC 204508 / S288c) GN=PHB2 PE=1 SV=2	196	80.1073	8.6357e-18	62.07	2	2	175	0	241	298
TRINITY_DN924_c0_g1	1	308	921	95.45	9.99	sp|Q2H0X9|MCD4_CHAGB GPI ethanolamine phosphate transferase 1 OS=Chaetomium globosum (strain ATCC 6205 / CBS 148.51 / DSM 1962 / NBRC 6347 / NRRL 1970) GN=MCD4 PE=3 SV=1	207	84.3445	2.49364e-18	48	-3	1	294	0	215	306
TRINITY_DN9798_c0_g1	1	299	929	95.32	10.23	sp|Q9UW15|RIR1_NEUCR Ribonucleoside-diphosphate reductase large chain OS=Neurospora crassa (strain ATCC 24698 / 74-OR23-1A / CBS 708.71 / DSM 1257 / FGSC 987) GN=rnr-1 PE=1 SV=2	386	153.295	1.34785e-42	70.53	-1	3	287	0	7	101
TRINITY_DN2568_c0_g1	1	293	451	73.72	15.74	sp|Q9P785|YNY5_SCHPO LisH domain-containing protein C1711.05 OS=Schizosaccharomyces pombe (strain 972 / ATCC 24843) GN=SPBC1711.05 PE=4 SV=1	167	68.9366	2.25837e-13	52	1	67	282	0	381	451
TRINITY_DN1602_c0_g2	1	281	1469	98.22	6.26	sp|Q9P7V2|ABC4_SCHPO ATP-binding cassette transporter abc4 OS=Schizosaccharomyces pombe (strain 972 / ATCC 24843) GN=abc4 PE=3 SV=1	234	94.7449	4.89961e-22	48.91	1	4	279	0	1160	1251
TRINITY_DN3549_c0_g2	1	256	303	98.44	28.05	sp|P33333|PLSC_YEAST Probable 1-acyl-sn-glycerol-3-phosphate acyltransferase OS=Saccharomyces cerevisiae (strain ATCC 204508 / S288c) GN=SLC1 PE=1 SV=1	173	71.2478	6.74966e-15	42.35	-3	3	254	0	49	133
TRINITY_DN4627_c0_g2	1	222	442	93.24	15.61	sp|P0CQ96|SUB2_CRYNJ ATP-dependent RNA helicase SUB2 OS=Cryptococcus neoformans var. neoformans serotype D (strain JEC21 / ATCC MYA-565) GN=SUB2 PE=3 SV=1	257	103.605	1.96523e-26	73.91	2	14	220	0	298	366
TRINITY_DN9711_c0_g1	1	213	575	98.59	12.7	sp|Q12198|METW_YEAST Putative cystathionine gamma-synthase YLL058W OS=Saccharomyces cerevisiae (strain ATCC 204508 / S288c) GN=YLL058W PE=1 SV=1	212	86.2705	8.31425e-20	60.81	-3	2	211	0	327	399
TRINITY_DN269_c0_g1	1	206	463	75.73	10.8	sp|Q39253|CAX1_ARATH Vacuolar cation/proton exchanger 1 OS=Arabidopsis thaliana GN=CAX1 PE=1 SV=3	110	46.9802	4.0139e-06	50	1	16	171	0	230	279
TRINITY_DN651_c0_g1	1	202	1069	74.26	4.68	sp|Q8K370|ACD10_MOUSE Acyl-CoA dehydrogenase family member 10 OS=Mus musculus GN=Acad10 PE=1 SV=1	128	53.9138	2.00447e-08	46	1	52	201	0	172	221
TRINITY_DN7725_c0_g2	1	8425	580	13.82	68.62	sp|O94547|SRK1_SCHPO Serine/threonine-protein kinase srk1 OS=Schizosaccharomyces pombe (strain 972 / ATCC 24843) GN=srk1 PE=1 SV=1	1126	438.343	3.48947e-133	59.85	-1	5813	6976	0	99	496
TRINITY_DN7668_c0_g1	1	6914	559	14.54	59.39	sp|Q01772|GLOX_PHACH Aldehyde oxidase GLOX OS=Phanerochaete chrysosporium GN=GLX PE=1 SV=1	646	253.447	4.04968e-106	41.94	-2	3644	4648	0	26	357
TRINITY_DN9311_c0_g1	1	5732	663	8.01	20.97	sp|Q00922|ALOX_CANBO Alcohol oxidase OS=Candida boidinii GN=AOD1 PE=1 SV=1	142	59.3066	7.67467e-11	31.21	-2	761	1219	0	215	353
TRINITY_DN9013_c1_g1	1	5530	798	10.25	24.44	sp|Q8BHL3|TB10B_MOUSE TBC1 domain family member 10B OS=Mus musculus GN=Tbc1d10b PE=1 SV=2	214	87.0409	9.75804e-16	27.55	2	4964	5530	0	315	509
TRINITY_DN6991_c0_g1	1	5276	728	10.12	24.31	sp|Q05935|MYBA_XENLA Myb-related protein A OS=Xenopus laevis GN=mybl1 PE=2 SV=1	308	123.25	5.31808e-27	34.97	-2	740	1273	0	38	214
TRINITY_DN8751_c1_g1	1	4903	1081	54.4	81.41	sp|Q5A599|NIK1_CANAL Histidine protein kinase NIK1 OS=Candida albicans (strain SC5314 / ATCC MYA-2876) GN=NIK1 PE=1 SV=3	2338	905.205	0	56.44	-2	751	3417	0	44	923
TRINITY_DN9176_c0_g1	1	4714	122	8.15	90.16	sp|P27999|RPB9_YEAST DNA-directed RNA polymerase II subunit RPB9 OS=Saccharomyces cerevisiae (strain ATCC 204508 / S288c) GN=RPB9 PE=1 SV=1	259	104.375	9.48831e-24	40.62	1	4	387	0	1	110
TRINITY_DN8695_c0_g1	1	4437	908	26.17	40.86	sp|Q9NBX4|RTXE_DROME Probable RNA-directed DNA polymerase from transposon X-element OS=Drosophila melanogaster GN=X-element\ORF2 PE=3 SV=1	300	120.168	6.4519e-26	26.41	1	3241	4401	0	440	810
TRINITY_DN9112_c0_g1	1	4345	889	41.29	63.89	sp|Q9P7I1|KHA1_SCHPO K(+)/H(+) antiporter 1 OS=Schizosaccharomyces pombe (strain 972 / ATCC 24843) GN=kha1 PE=3 SV=2	850	332.028	6.65681e-95	39.97	-1	2093	3886	0	5	572
TRINITY_DN7616_c0_g1	1	4237	1258	74.06	81.24	sp|O94296|YOOC_SCHPO Probable phospholipid-transporting ATPase C887.12 OS=Schizosaccharomyces pombe (strain 972 / ATCC 24843) GN=SPBC887.12 PE=3 SV=1	3126	1208.74	0	59.66	-2	1099	4236	0	229	1250
TRINITY_DN8238_c2_g3	1	4161	325	30.57	100	sp|Q552R1|DCAF7_DICDI DDB1- and CUL4-associated factor 7 homolog OS=Dictyostelium discoideum GN=wdr68 PE=3 SV=2	641	251.521	1.42136e-72	37.26	1	166	1437	0	1	325
TRINITY_DN7154_c0_g3	1	4092	744	44.57	80.65	sp|P0CM78|GRC3_CRYNJ Polynucleotide 5&apos;-hydroxyl-kinase GRC3 OS=Cryptococcus neoformans var. neoformans serotype D (strain JEC21 / ATCC MYA-565) GN=GRC3 PE=3 SV=1	647	253.832	3.00824e-69	33.33	-1	1831	3654	0	144	743
TRINITY_DN8788_c0_g1	1	4008	473	26.57	62.79	sp|Q12078|SMF3_YEAST Iron transporter SMF3 OS=Saccharomyces cerevisiae (strain ATCC 204508 / S288c) GN=SMF3 PE=1 SV=1	421	166.777	5.02483e-55	32.68	-1	760	1824	0	6	302
TRINITY_DN8681_c0_g1	1	3642	196	11.04	70.92	sp|Q4V7N4|TMA16_XENLA Translation machinery-associated protein 16 OS=Xenopus laevis GN=tma16 PE=2 SV=1	147	61.2326	5.6722e-09	30.71	-2	1482	1883	0	7	145
TRINITY_DN3850_c0_g1	1	3573	451	14.19	23.06	sp|Q5KQF5|CIPKM_ORYSJ CBL-interacting protein kinase 22 OS=Oryza sativa subsp. japonica GN=CIPK22 PE=2 SV=1	143	59.6918	9.85747e-08	28.57	-2	12	518	0	139	242
TRINITY_DN5204_c0_g1	1	3349	300	25.62	87.33	sp|Q6BDR8|NSE4_SCHPO Non-structural maintenance of chromosome element 4 OS=Schizosaccharomyces pombe (strain 972 / ATCC 24843) GN=nse4 PE=1 SV=1	323	129.028	8.74933e-31	28.77	-2	415	1272	0	5	266
TRINITY_DN7926_c0_g1	1	3260	894	24.39	29.87	sp|Q01373|FOX2_NEUCR Peroxisomal hydratase-dehydrogenase-epimerase OS=Neurospora crassa (strain ATCC 24698 / 74-OR23-1A / CBS 708.71 / DSM 1257 / FGSC 987) GN=fox-2 PE=1 SV=1	751	293.893	1.1957e-82	58.36	-1	2214	3008	0	627	893
TRINITY_DN5968_c0_g1	1	3213	397	19.05	48.11	sp|P0CO57|LCMT1_CRYNB Leucine carboxyl methyltransferase 1 OS=Cryptococcus neoformans var. neoformans serotype D (strain B-3501A) GN=PPM1 PE=3 SV=1	238	96.2857	2.87018e-40	42.11	-1	187	798	0	196	386
TRINITY_DN6404_c0_g1	1	3175	253	6.05	25.3	sp|Q05528|KDUD_DICD3 2-dehydro-3-deoxy-D-gluconate 5-dehydrogenase OS=Dickeya dadantii (strain 3937) GN=kduD PE=1 SV=2	160	66.2402	1.73041e-10	46.88	-1	221	412	0	190	253
TRINITY_DN9327_c1_g1	1	3133	401	25.09	57.36	sp|E3QQU9|LAP1_COLGM Leucine aminopeptidase 1 OS=Colletotrichum graminicola (strain M1.001 / M2 / FGSC 10212) GN=LAP1 PE=3 SV=1	563	221.476	8.29278e-76	46.67	-2	1072	1857	0	154	383
TRINITY_DN9130_c1_g4	1	3101	138	12.58	79.71	sp|P53173|ERV14_YEAST ER-derived vesicles protein ERV14 OS=Saccharomyces cerevisiae (strain ATCC 204508 / S288c) GN=ERV14 PE=1 SV=3	257	103.605	1.45848e-23	50	-3	2431	2820	0	25	134
TRINITY_DN8592_c0_g1	1	3062	218	6.76	31.65	sp|P87170|DGK1_SCHPO CTP-dependent diacylglycerol kinase 1 OS=Schizosaccharomyces pombe (strain 972 / ATCC 24843) GN=ptp4 PE=3 SV=1	147	61.2326	5.34313e-20	47.83	-1	2352	2558	0	15	83
TRINITY_DN6719_c0_g2	1	3022	307	16.68	54.72	sp|A7GCK7|PSUG_CLOBL Pseudouridine-5&apos;-phosphate glycosidase OS=Clostridium botulinum (strain Langeland / NCTC 10281 / Type F) GN=psuG PE=3 SV=1	424	167.933	3.35343e-62	52.98	-1	428	931	0	6	173
TRINITY_DN8898_c0_g1	1	2983	2250	81.66	36.49	sp|P0CN26|DPOE_CRYNJ DNA polymerase epsilon catalytic subunit A OS=Cryptococcus neoformans var. neoformans serotype D (strain JEC21 / ATCC MYA-565) GN=POL2 PE=3 SV=1	1251	486.493	4.66195e-146	35.65	3	3	2438	0	1430	2250
TRINITY_DN7902_c0_g1	1	2922	588	22.69	36.73	sp|B8NM76|USTR_ASPFN ustiloxin B cluster transcription factor ustR OS=Aspergillus flavus (strain ATCC 200026 / FGSC A1120 / NRRL 3357 / JCM 12722 / SRRC 167) GN=ustR PE=3 SV=2	159	65.855	1.21283e-09	21.98	1	1480	2142	0	347	562
TRINITY_DN7577_c0_g1	1	2887	421	35.54	76.01	sp|O74995|TFH47_SCHPO TFIIH basal transcription factor complex p47 subunit OS=Schizosaccharomyces pombe (strain 972 / ATCC 24843) GN=tfh47 PE=1 SV=1	721	282.337	1.1822e-83	42.77	-2	16	1041	0	35	354
TRINITY_DN8470_c0_g1	1	2855	339	20.28	53.39	sp|P0CS50|SEC13_CRYNJ Protein transport protein SEC13 OS=Cryptococcus neoformans var. neoformans serotype D (strain JEC21 / ATCC MYA-565) GN=SEC13 PE=3 SV=1	499	196.823	2.91166e-96	52.85	-2	1850	2428	0	159	339
TRINITY_DN7419_c0_g1	1	2825	926	51.08	47.41	sp|P87000|ACU15_NEUCR Transcriptional activator protein acu-15 OS=Neurospora crassa (strain ATCC 24698 / 74-OR23-1A / CBS 708.71 / DSM 1257 / FGSC 987) GN=acu-15 PE=1 SV=2	202	82.4185	1.18507e-14	22.18	3	591	2033	0	23	461
TRINITY_DN8415_c1_g1	1	2795	580	16.1	26.9	sp|P87035|GPA4_USTMA Guanine nucleotide-binding protein alpha-4 subunit OS=Ustilago maydis (strain 521 / FGSC 9021) GN=GPA4 PE=3 SV=1	303	121.324	1.12852e-34	41.77	-1	312	761	0	424	579
TRINITY_DN8100_c0_g1	1	2729	488	28.36	49.8	sp|O13924|HASP_SCHPO Serine/threonine-protein kinase haspin homolog hrk1 OS=Schizosaccharomyces pombe (strain 972 / ATCC 24843) GN=hrk1 PE=1 SV=1	304	121.709	6.18135e-38	33.7	-1	570	1343	0	144	386
TRINITY_DN6425_c0_g2	1	2690	1297	34.57	25.37	sp|Q9Y817|RAV1_SCHPO Regulator of V-ATPase in vacuolar membrane protein 1 OS=Schizosaccharomyces pombe (strain 972 / ATCC 24843) GN=rav1 PE=1 SV=1	293	117.472	1.95651e-25	30.06	-2	179	1108	0	440	768
TRINITY_DN1704_c0_g1	1	2668	3655	84.9	22.19	sp|Q10064|YAMB_SCHPO Uncharacterized PI3/PI4-kinase family protein C1F5.11c OS=Schizosaccharomyces pombe (strain 972 / ATCC 24843) GN=SPAC1F5.11c PE=3 SV=1	980	382.104	1.38198e-110	29.79	-3	252	2516	0	42	852
TRINITY_DN8417_c0_g1	1	2647	482	6.35	11.83	sp|Q9P6J0|YHDC_SCHPO Uncharacterized transporter C1683.12 OS=Schizosaccharomyces pombe (strain 972 / ATCC 24843) GN=SPBC1683.12 PE=3 SV=1	132	55.4546	3.71536e-08	50.88	1	751	918	0	92	148
TRINITY_DN9147_c2_g10	1	2551	564	60.09	94.86	sp|D4B1N9|LIP3_ARTBC Probable secreted lipase ARB_02369 OS=Arthroderma benhamiae (strain ATCC MYA-4681 / CBS 112371) GN=ARB_02369 PE=1 SV=1	422	167.162	2.72015e-42	29.64	-2	433	1965	0	6	540
TRINITY_DN7930_c0_g1	1	2529	390	29.42	58.97	sp|O80358|FPG_ARATH Formamidopyrimidine-DNA glycosylase OS=Arabidopsis thaliana GN=FPG1 PE=1 SV=1	439	173.711	8.7119e-46	38.43	-1	1516	2259	0	59	288
TRINITY_DN2044_c0_g1	1	2481	389	40.39	80.98	sp|O14206|YDD3_SCHPO Brix domain-containing protein C1B9.03c OS=Schizosaccharomyces pombe (strain 972 / ATCC 24843) GN=SPAC1B9.03c PE=1 SV=2	493	194.512	3.392e-53	38.46	2	263	1264	0	4	318
TRINITY_DN1228_c0_g1	1	2443	924	30.7	25.43	sp|D4AUF1|WSCD1_ARTBC WSC domain-containing protein ARB_07867 OS=Arthroderma benhamiae (strain ATCC MYA-4681 / CBS 112371) GN=ARB_07867 PE=1 SV=1	132	55.4546	2.32358e-06	24.82	-2	1423	2172	0	55	289
TRINITY_DN9197_c1_g1	1	2425	542	21.03	30.63	sp|O60113|YG64_SCHPO Uncharacterized amino-acid permease C15C4.04c OS=Schizosaccharomyces pombe (strain 972 / ATCC 24843) GN=SPBC15C4.04c PE=3 SV=1	203	82.8037	3.52257e-23	37.43	-3	1581	2090	0	362	527
TRINITY_DN8460_c0_g1	1	2409	289	32.5	84.43	sp|Q8N5M1|ATPF2_HUMAN ATP synthase mitochondrial F1 complex assembly factor 2 OS=Homo sapiens GN=ATPAF2 PE=1 SV=1	356	141.739	1.30886e-35	31.44	-1	1498	2280	0	30	273
TRINITY_DN8013_c0_g1	1	2338	523	19.76	28.49	sp|P0DPB2|PSIT2_PSICU Major facilitor-type transporter psiT2 OS=Psilocybe cubensis GN=psiT2 PE=3 SV=1	209	85.1149	1.25518e-33	33.12	2	437	898	0	30	178
TRINITY_DN6150_c0_g1	1	2296	1183	60.89	41.25	sp|P0CQ08|PAN2_CRYNJ PAN2-PAN3 deadenylation complex catalytic subunit PAN2 OS=Cryptococcus neoformans var. neoformans serotype D (strain JEC21 / ATCC MYA-565) GN=PAN2 PE=3 SV=1	853	333.183	1.5567e-100	40.6	2	899	2296	0	367	854
TRINITY_DN4460_c0_g2	1	2277	412	50.59	80.1	sp|Q2KJG8|BCKD_BOVIN [3-methyl-2-oxobutanoate dehydrogenase [lipoamide]] kinase, mitochondrial OS=Bos taurus GN=BCKDK PE=2 SV=1	517	203.756	2.01503e-56	32.64	2	242	1393	0	75	404
TRINITY_DN8406_c0_g1	1	2256	290	20.35	45.17	sp|Q58DM8|ECHM_BOVIN Enoyl-CoA hydratase, mitochondrial OS=Bos taurus GN=ECHS1 PE=2 SV=1	195	79.7221	7.2871e-22	33.97	3	132	590	0	46	176
TRINITY_DN6952_c0_g1	1	2242	666	35.06	36.49	sp|D4B093|A1864_ARTBC Secreted protein ARB_01864 OS=Arthroderma benhamiae (strain ATCC MYA-4681 / CBS 112371) GN=ARB_01864 PE=1 SV=1	388	154.066	1.40684e-51	40.3	2	377	1162	0	78	320
TRINITY_DN8590_c1_g1	1	2217	421	24.49	45.61	sp|P50325|CDA_AMYRO Chitin deacetylase OS=Amylomyces rouxii PE=1 SV=1	323	129.028	1.08523e-31	38.54	-2	1122	1664	0	65	256
TRINITY_DN7679_c1_g1	1	2147	1151	71.82	44.05	sp|P40527|ATC7_YEAST Probable phospholipid-transporting ATPase NEO1 OS=Saccharomyces cerevisiae (strain ATCC 204508 / S288c) GN=NEO1 PE=1 SV=1	1604	622.468	0	60	-1	3	1544	0	506	1012
TRINITY_DN6886_c0_g1	1	2115	413	11.49	19.61	sp|Q04635|ESC1_SCHPO Protein esc1 OS=Schizosaccharomyces pombe (strain 972 / ATCC 24843) GN=esc1 PE=2 SV=1	239	96.6709	4.9703e-20	49.38	2	1352	1594	0	328	408
TRINITY_DN8199_c0_g1	1	2097	504	80.11	96.63	sp|Q2UB20|ALG8_ASPOR Dolichyl pyrophosphate Glc1Man9GlcNAc2 alpha-1,3-glucosyltransferase OS=Aspergillus oryzae (strain ATCC 42149 / RIB 40) GN=alg8 PE=3 SV=1	952	371.318	1.99573e-118	42.36	3	216	1895	0	15	501
TRINITY_DN6284_c0_g1	1	2079	535	23.23	29.91	sp|Q5REK0|FMO2_PONAB Dimethylaniline monooxygenase [N-oxide-forming] 2 OS=Pongo abelii GN=FMO2 PE=2 SV=3	233	94.3597	1.13065e-22	31.18	-1	1438	1920	0	58	217
TRINITY_DN2881_c0_g1	1	2044	325	24.51	51.38	sp|Q09695|YA22_SCHPO Uncharacterized protein C2F7.02c OS=Schizosaccharomyces pombe (strain 972 / ATCC 24843) GN=SPAC2F7.02c PE=1 SV=1	599	235.343	2.94703e-69	66.47	2	1175	1675	0	156	322
TRINITY_DN6370_c0_g1	1	2029	307	27.06	51.79	sp|Q32L63|VTA1_BOVIN Vacuolar protein sorting-associated protein VTA1 homolog OS=Bos taurus GN=VTA1 PE=2 SV=1	279	112.079	1.45052e-25	34.97	-2	1237	1785	0	1	159
TRINITY_DN6514_c1_g1	1	1999	301	30.62	60.13	sp|O74545|YCV6_SCHPO Putative hydrolase C777.06c OS=Schizosaccharomyces pombe (strain 972 / ATCC 24843) GN=SPCC777.06c PE=4 SV=1	435	172.17	1.1247e-46	44.17	1	643	1254	0	8	188
TRINITY_DN8443_c0_g1	1	1969	427	24.07	33.72	sp|J4VWM7|OPS4_BEAB2 FAD-dependent monooxygenase OpS4 OS=Beauveria bassiana (strain ARSEF 2860) GN=OpS4 PE=1 SV=1	220	89.3521	4.48014e-50	35.44	2	1367	1840	0	277	420
TRINITY_DN7585_c0_g2	1	1941	508	59.97	75	sp|P0DPA7|PSIH_PSICU Cytochrome P450 monooxygenase psiH OS=Psilocybe cubensis GN=psiH PE=1 SV=1	653	256.144	3.17535e-75	36.32	-2	432	1595	0	60	440
TRINITY_DN5411_c0_g1	1	1909	699	48.56	41.34	sp|P20533|CHIA1_BACCI Chitinase A1 OS=Bacillus circulans GN=chiA1 PE=1 SV=1	332	132.494	6.43219e-31	30.41	-2	163	1089	0	159	447
TRINITY_DN7701_c0_g1	1	1891	428	41.25	54.91	sp|O34371|YTET_BACSU Putative oxidoreductase YteT OS=Bacillus subtilis (strain 168) GN=yteT PE=2 SV=1	183	75.0998	5.47036e-13	23.13	-1	545	1324	0	73	307
TRINITY_DN8668_c2_g11	1	1866	682	24.12	23.61	sp|P39992|YEC3_YEAST Uncharacterized protein YEL023C OS=Saccharomyces cerevisiae (strain ATCC 204508 / S288c) GN=YEL023C PE=4 SV=1	294	117.857	2.72261e-26	41.61	1	496	945	0	89	249
TRINITY_DN9223_c1_g3	1	1850	426	9.24	11.27	sp|Q9HEV5|ASD4_NEUCR GATA type zinc finger protein asd-4 OS=Neurospora crassa (strain ATCC 24698 / 74-OR23-1A / CBS 708.71 / DSM 1257 / FGSC 987) GN=asd-4 PE=1 SV=1	130	54.6842	1.56183e-06	43.86	-3	943	1113	0	16	63
TRINITY_DN6876_c0_g1	1	1813	716	36.07	30.31	sp|D4AYS6|A1345_ARTBC Probable extracellular serine carboxypeptidase OS=Arthroderma benhamiae (strain ATCC MYA-4681 / CBS 112371) GN=ARB_01345 PE=1 SV=1	400	158.688	6.89146e-40	39.55	2	728	1381	0	74	290
TRINITY_DN9027_c1_g8	1	1803	495	62.4	68.69	sp|A0A089FNE5|PRLL_FUNXX MFS transporter prlL OS=Fungal sp. (strain NRRL 50135) GN=prlL PE=3 SV=1	302	120.939	7.46442e-28	27.11	-1	133	1257	0	16	355
TRINITY_DN5916_c0_g1	1	1776	468	56.59	72.01	sp|Q9P3W6|YLI2_SCHPO Uncharacterized protein C458.02c OS=Schizosaccharomyces pombe (strain 972 / ATCC 24843) GN=SPAC458.02c PE=1 SV=1	398	157.918	1.33511e-40	34.81	-3	554	1558	0	8	344
TRINITY_DN5455_c0_g2	1	1766	1002	67.27	32.73	sp|A3AWA4|HMA5_ORYSJ Copper-transporting ATPase HMA5 OS=Oryza sativa subsp. japonica GN=HMA5 PE=2 SV=1	219	88.9669	4.79002e-17	25.43	-3	46	1233	0	81	408
TRINITY_DN7002_c0_g1	1	1741	274	47.04	99.64	sp|Q29NT9|GNPI_DROPS Glucosamine-6-phosphate isomerase OS=Drosophila pseudoobscura pseudoobscura GN=Gnpda1 PE=3 SV=1	862	336.65	1.0627e-109	64.84	1	676	1494	0	1	273
TRINITY_DN9105_c2_g3	1	1730	292	28.27	54.11	sp|O74628|YQ53_SCHPO Uncharacterized oxidoreductase C162.03 OS=Schizosaccharomyces pombe (strain 972 / ATCC 24843) GN=SPCC162.03 PE=3 SV=1	216	87.8113	4.08241e-32	31.29	-1	726	1214	0	117	274
TRINITY_DN7816_c0_g1	1	1721	551	92.91	96.01	sp|P37211|ATPA_NEUCR ATP synthase subunit alpha, mitochondrial OS=Neurospora crassa (strain ATCC 24698 / 74-OR23-1A / CBS 708.71 / DSM 1257 / FGSC 987) GN=atp-1 PE=3 SV=1	2100	813.527	0	73.41	-1	45	1643	0	21	549
TRINITY_DN7579_c0_g1	1	1695	512	11.15	12.89	sp|A2VCV0|OGRL1_XENTR Opioid growth factor receptor-like protein 1 OS=Xenopus tropicalis GN=ogfrl1 PE=2 SV=1	148	61.6178	2.23146e-22	46.97	-3	1478	1666	0	108	173
TRINITY_DN8892_c0_g1	1	1685	662	65.88	55.44	sp|O74718|ERF3_SCHPO Eukaryotic peptide chain release factor GTP-binding subunit OS=Schizosaccharomyces pombe (strain 972 / ATCC 24843) GN=sup35 PE=1 SV=2	1330	516.924	1.23208e-174	62.8	2	572	1681	0	226	592
TRINITY_DN8918_c1_g10	1	1673	942	73.52	43.21	sp|Q99127|CHS4_USTMA Chitin synthase 4 OS=Ustilago maydis (strain 521 / FGSC 9021) GN=CHS4 PE=3 SV=2	1323	514.227	3.57732e-170	63.44	-1	444	1673	0	481	887
TRINITY_DN7626_c0_g1	1	1663	565	64.76	63.19	sp|P49412|PRIB_LENED Protein priB OS=Lentinula edodes GN=priB PE=2 SV=1	1023	398.667	5.08525e-130	56.23	-3	3	1079	0	64	420
TRINITY_DN6601_c1_g1	1	1638	602	43.59	33.72	sp|Q3L245|PDH1_LEUMG Pyranose dehydrogenase 1 OS=Leucoagaricus meleagris GN=pdh1 PE=1 SV=1	238	96.2857	1.67149e-35	31.4	-2	924	1637	0	295	497
TRINITY_DN7888_c0_g1	1	1627	647	70.99	57.03	sp|Q5RHI5|DTL_DANRE Denticleless protein homolog OS=Danio rerio GN=dtl PE=2 SV=1	377	149.828	2.37408e-37	30.1	-3	54	1208	0	22	390
TRINITY_DN8548_c0_g1	1	1617	878	69.2	39.98	sp|D4B0V1|E13B_ARTBC Probable glucan endo-1,3-beta-glucosidase ARB_02077 OS=Arthroderma benhamiae (strain ATCC MYA-4681 / CBS 112371) GN=ARB_02077 PE=1 SV=1	843	329.331	2.43492e-100	46.68	-1	211	1329	0	22	372
TRINITY_DN6751_c0_g3	1	1607	730	12.51	9.45	sp|P18494|GLN3_YEAST Nitrogen regulatory protein GLN3 OS=Saccharomyces cerevisiae (strain ATCC 204508 / S288c) GN=GLN3 PE=1 SV=2	222	90.1225	1.27407e-17	57.97	-1	1404	1604	0	305	373
TRINITY_DN9198_c0_g3	1	1587	770	65.6	45.32	sp|Q06833|YP091_YEAST Uncharacterized PH domain-containing protein YPR091C OS=Saccharomyces cerevisiae (strain ATCC 204508 / S288c) GN=YPR091C PE=1 SV=1	482	190.274	6.83789e-51	30.35	-3	2	1042	0	127	475
TRINITY_DN2806_c0_g1	1	1576	1022	26.65	12.33	sp|Q6K431|TRX1_ORYSJ Histone-lysine N-methyltransferase TRX1 OS=Oryza sativa subsp. japonica GN=TRX1 PE=1 SV=1	188	77.0258	2.10735e-13	33.1	2	1115	1534	0	581	706
TRINITY_DN6730_c0_g1	1	1559	1150	17.9	8	sp|Q9FT70|RQL4B_ARATH ATP-dependent DNA helicase Q-like 4B OS=Arabidopsis thaliana GN=RECQL4B PE=2 SV=1	139	58.151	1.19154e-11	35.42	2	455	733	0	558	649
TRINITY_DN6406_c0_g3	1	1551	407	50.29	57.74	sp|Q9HDX2|YKN3_SCHPO Uncharacterized lactate 2-monooxygenase PB1A11.03 OS=Schizosaccharomyces pombe (strain 972 / ATCC 24843) GN=SPAPB1A11.03 PE=3 SV=1	492	194.126	1.0108e-74	46.18	1	727	1506	0	167	401
TRINITY_DN7030_c0_g1	1	1533	494	25.64	24.49	sp|Q5A1M4|TRY3_CANAL Transcriptional regulator of yeast form adherence 3 OS=Candida albicans (strain SC5314 / ATCC MYA-2876) GN=TRY3 PE=2 SV=2	247	99.7525	6.68227e-25	45.52	1	1111	1503	0	335	455
TRINITY_DN5624_c0_g1	1	1514	1328	49.74	13.93	sp|Q09811|HUS2_SCHPO ATP-dependent DNA helicase hus2/rqh1 OS=Schizosaccharomyces pombe (strain 972 / ATCC 24843) GN=rqh1 PE=1 SV=1	320	127.872	1.3822e-50	35.29	-3	220	972	0	648	832
TRINITY_DN6547_c1_g2	1	1494	860	96.18	48.84	sp|A3KPK0|AGO3_DANRE Protein argonaute-3 OS=Danio rerio GN=ago3 PE=3 SV=1	755	295.434	2.37622e-88	38.51	-3	56	1492	0	441	860
TRINITY_DN8240_c0_g1	1	1481	830	90.55	54.94	sp|P40377|MCM2_SCHPO DNA replication licensing factor mcm2 OS=Schizosaccharomyces pombe (strain 972 / ATCC 24843) GN=mcm2 PE=1 SV=1	1772	687.182	0	72.81	2	2	1342	0	374	829
TRINITY_DN8529_c0_g1	1	1464	736	49.59	28.12	sp|A2QTU5|XYLA_ASPNC Alpha-xylosidase A OS=Aspergillus niger (strain CBS 513.88 / FGSC A1513) GN=axlA PE=1 SV=1	565	222.246	2.17286e-62	48.76	1	739	1464	0	218	424
TRINITY_DN9040_c0_g3	1	1410	492	97.02	89.02	sp|P78812|6PGD_SCHPO 6-phosphogluconate dehydrogenase, decarboxylating OS=Schizosaccharomyces pombe (strain 972 / ATCC 24843) GN=SPBC660.16 PE=1 SV=2	1537	596.66	0	66.74	2	2	1369	0	55	492
TRINITY_DN6791_c0_g2	1	1384	344	10.84	14.53	sp|Q09801|FIP1X_SCHPO Pre-mRNA polyadenylation factor fip1 OS=Schizosaccharomyces pombe (strain 972 / ATCC 24843) GN=SPAC22G7.10 PE=3 SV=1	194	79.337	7.59811e-15	56	-3	1047	1196	0	112	161
TRINITY_DN7895_c0_g2	1	1377	1227	99.78	36.02	sp|Q92620|PRP16_HUMAN Pre-mRNA-splicing factor ATP-dependent RNA helicase PRP16 OS=Homo sapiens GN=DHX38 PE=1 SV=2	1563	606.675	0	65.07	2	2	1375	0	672	1113
TRINITY_DN6401_c0_g1	1	1369	529	67.71	60.11	sp|B8MYS7|MF127_ASPFN MFS glucose transporter mfs1 OS=Aspergillus flavus (strain ATCC 200026 / FGSC A1120 / NRRL 3357 / JCM 12722 / SRRC 167) GN=mfs1 PE=2 SV=1	915	357.066	8.67102e-116	54.21	-2	427	1353	0	103	420
TRINITY_DN6990_c0_g1	1	1360	326	75.22	98.47	sp|A8N0V8|GET3_COPC7 ATPase GET3 OS=Coprinopsis cinerea (strain Okayama-7 / 130 / ATCC MYA-4618 / FGSC 9003) GN=GET3 PE=3 SV=1	1514	587.8	0	87.39	-1	224	1246	0	6	326
TRINITY_DN7768_c0_g1	1	1349	989	35.8	14.36	sp|Q60560|SMBP2_MESAU DNA-binding protein SMUBP-2 OS=Mesocricetus auratus GN=IGHMBP2 PE=1 SV=1	270	108.612	2.37518e-26	43.21	-3	202	684	0	146	287
TRINITY_DN6089_c0_g2	1	1342	1909	45.83	11.11	sp|Q9SP32|DCL1_ARATH Endoribonuclease Dicer homolog 1 OS=Arabidopsis thaliana GN=DCL1 PE=1 SV=2	431	170.629	8.42381e-44	43.66	-1	674	1288	0	250	461
TRINITY_DN8730_c1_g1	1	1334	690	13.04	8.26	sp|Q54H45|DRKB_DICDI Probable serine/threonine-protein kinase drkB OS=Dictyostelium discoideum GN=drkB PE=3 SV=1	130	54.6842	1.24996e-06	36.21	2	1151	1324	0	397	453
TRINITY_DN6449_c0_g2	1	1305	378	57.47	63.49	sp|Q84L30|RD23D_ARATH Ubiquitin receptor RAD23d OS=Arabidopsis thaliana GN=RAD23D PE=1 SV=2	220	89.3521	3.03956e-18	36.47	-3	71	820	0	139	378
TRINITY_DN7856_c0_g1	1	1296	366	59.95	60.93	sp|Q9UT21|YFY7_SCHPO Uncharacterized GTP-binding protein C9.07c OS=Schizosaccharomyces pombe (strain 972 / ATCC 24843) GN=SPAC9.07c PE=2 SV=1	708	277.33	2.21854e-87	56.37	-1	1	777	0	137	359
TRINITY_DN8170_c0_g2	1	1280	786	48.98	26.72	sp|A7LXU3|BGH3B_BACO1 Beta-glucosidase BoGH3B OS=Bacteroides ovatus (strain ATCC 8483 / DSM 1896 / JCM 5824 / NCTC 11153) GN=BACOVA_02659 PE=1 SV=1	250	100.908	1.59856e-21	29.3	1	646	1272	0	34	243
TRINITY_DN7931_c1_g1	1	1241	556	55.84	46.58	sp|O44400|F37C4_CAEEL Protein F37C4.5 OS=Caenorhabditis elegans GN=F37C4.5 PE=1 SV=3	176	72.4034	2.24975e-12	25.86	2	248	940	0	30	288
TRINITY_DN6017_c0_g4	1	1218	1037	91.38	32.21	sp|P22189|ATC3_SCHPO Calcium-transporting ATPase 3 OS=Schizosaccharomyces pombe (strain 972 / ATCC 24843) GN=cta3 PE=1 SV=1	609	239.195	1.19505e-68	39.32	1	103	1215	0	269	602
TRINITY_DN5743_c0_g2	1	1197	839	93.73	43.15	sp|Q2U8Y5|BGLI_ASPOR Probable beta-glucosidase I OS=Aspergillus oryzae (strain ATCC 42149 / RIB 40) GN=bglI PE=3 SV=1	598	234.958	1.14351e-67	38.73	3	75	1196	0	220	581
TRINITY_DN5692_c0_g1	1	1190	960	65.55	24.79	sp|Q3LSS0|C19L2_DANRE CWF19-like protein 2 OS=Danio rerio GN=cwf19l2 PE=2 SV=1	435	172.17	2.92279e-45	35.38	2	56	835	0	719	956
TRINITY_DN7470_c1_g3	1	1184	505	82.09	66.34	sp|P55059|PDI_HUMIN Protein disulfide-isomerase OS=Humicola insolens PE=1 SV=1	603	236.884	1.2229e-70	40.46	-2	2	973	0	40	374
TRINITY_DN8939_c0_g1	1	1161	400	54.01	52	sp|Q5EA37|CC130_BOVIN Coiled-coil domain-containing protein 130 OS=Bos taurus GN=CCDC130 PE=2 SV=1	500	197.208	8.64152e-57	50	1	208	834	0	6	213
TRINITY_DN8385_c0_g4	1	1129	579	59.52	37.31	sp|O08914|FAAH1_MOUSE Fatty-acid amide hydrolase 1 OS=Mus musculus GN=Faah PE=1 SV=1	215	87.4261	2.06337e-17	29.78	-1	407	1078	0	357	572
TRINITY_DN4941_c0_g1	1	1108	259	59.03	84.56	sp|O13672|RL8_SCHPO 60S ribosomal protein L8 OS=Schizosaccharomyces pombe (strain 972 / ATCC 24843) GN=rpl8 PE=1 SV=3	758	296.59	3.69997e-97	70.32	-2	106	759	0	24	242
TRINITY_DN8759_c0_g4	1	1084	970	93.82	34.95	sp|P37202|DIS3_SCHPO Exosome complex exonuclease dis3 OS=Schizosaccharomyces pombe (strain 972 / ATCC 24843) GN=dis3 PE=1 SV=1	887	346.28	1.34857e-108	56.61	-1	65	1081	0	631	969
TRINITY_DN4300_c0_g1	1	1072	1085	94.59	28.94	sp|P24339|CUT7_SCHPO Kinesin-like protein cut7 OS=Schizosaccharomyces pombe (strain 972 / ATCC 24843) GN=cut7 PE=1 SV=3	841	328.561	3.68972e-101	53.28	-2	1	1014	0	59	372
TRINITY_DN2046_c0_g1	1	1059	356	51.56	51.69	sp|Q01578|GNL_ZYMMO Gluconolactonase OS=Zymomonas mobilis subsp. mobilis (strain ATCC 31821 / ZM4 / CP4) GN=gnl PE=1 SV=2	175	72.0182	1.05562e-12	28.35	1	388	933	0	161	344
TRINITY_DN4691_c0_g1	1	1037	361	51.49	47.92	sp|Q9D5T0|ATAD1_MOUSE ATPase family AAA domain-containing protein 1 OS=Mus musculus GN=Atad1 PE=1 SV=1	305	122.094	6.24846e-30	38.76	-3	133	666	0	68	240
TRINITY_DN3490_c0_g1	1	1025	197	36.59	55.33	sp|Q93W54|ICMTB_ARATH Protein-S-isoprenylcysteine O-methyltransferase B OS=Arabidopsis thaliana GN=ICMTB PE=1 SV=1	129	54.299	2.25951e-07	28.35	3	450	824	0	82	190
TRINITY_DN5191_c0_g1	1	1018	326	73.38	77.3	sp|P0CR50|SLT11_CRYNJ Pre-mRNA-splicing factor SLT11 OS=Cryptococcus neoformans var. neoformans serotype D (strain JEC21 / ATCC MYA-565) GN=SLT11 PE=3 SV=1	786	307.375	8.48657e-101	59.06	-2	271	1017	0	23	274
TRINITY_DN6475_c0_g1	1	1002	276	80.24	64.86	sp|Q5PP70|NTM1_ARATH Alpha N-terminal protein methyltransferase 1 OS=Arabidopsis thaliana GN=At5g44450 PE=2 SV=1	166	68.5514	8.48221e-15	25.56	-3	167	970	0	37	215
TRINITY_DN2983_c0_g4	1	983	1883	68.97	12.21	sp|Q4PF83|NTE1_USTMA Lysophospholipase NTE1 OS=Ustilago maydis (strain 521 / FGSC 9021) GN=NTE1 PE=3 SV=1	515	202.986	4.68156e-56	53.48	-2	170	847	0	52	281
TRINITY_DN3380_c0_g1	1	960	363	76.88	71.07	sp|P0CQ68|RMT2_CRYNJ Protein arginine N-methyltransferase 2 OS=Cryptococcus neoformans var. neoformans serotype D (strain JEC21 / ATCC MYA-565) GN=RMT2 PE=3 SV=1	493	194.512	6.25054e-57	44.27	1	103	840	0	106	363
TRINITY_DN5235_c0_g5	1	949	975	76.19	24	sp|Q9UI26|IPO11_HUMAN Importin-11 OS=Homo sapiens GN=IPO11 PE=1 SV=1	265	106.686	7.67405e-24	28.81	3	3	725	0	489	722
TRINITY_DN7885_c0_g3	1	929	974	21.96	6.98	sp|P53535|PHSL2_SOLTU Alpha-1,4 glucan phosphorylase L-2 isozyme, chloroplastic/amyloplastic OS=Solanum tuberosum GN=STP-1 PE=1 SV=1	264	106.301	1.1954e-23	70.59	-2	608	811	0	776	843
TRINITY_DN5851_c2_g1	1	918	203	55.23	83.25	sp|P33723|YPT1_NEUCR GTP-binding protein ypt1 OS=Neurospora crassa (strain ATCC 24698 / 74-OR23-1A / CBS 708.71 / DSM 1257 / FGSC 987) GN=ypt-1 PE=3 SV=1	828	323.553	1.67202e-109	91.12	-2	321	827	0	4	172
TRINITY_DN411_c0_g1	1	895	458	34.86	19	sp|Q54DY9|BCS1B_DICDI Probable mitochondrial chaperone BCS1-B OS=Dictyostelium discoideum GN=bcsl1b PE=3 SV=1	123	51.9878	1.50702e-09	25.96	-1	416	727	0	372	458
TRINITY_DN5375_c0_g2	1	880	572	69.89	34.09	sp|Q5UNY4|YL728_MIMIV Uncharacterized protein L728 OS=Acanthamoeba polyphaga mimivirus GN=MIMI_L728 PE=4 SV=1	246	99.3673	6.64332e-22	29.33	-2	217	831	0	293	487
TRINITY_DN6006_c0_g3	1	875	491	47.31	27.09	sp|Q9USN4|YJA1_SCHPO Uncharacterized transporter C1529.01 OS=Schizosaccharomyces pombe (strain 972 / ATCC 24843) GN=SPCC1529.01 PE=3 SV=2	328	130.954	3.90178e-37	43.48	-3	457	870	0	297	429
TRINITY_DN5109_c0_g4	1	866	1004	69.98	19.42	sp|P23249|MOV10_MOUSE Putative helicase MOV-10 OS=Mus musculus GN=Mov10 PE=1 SV=2	432	171.014	6.35891e-46	44.19	2	2	607	0	753	947
TRINITY_DN1700_c0_g1	1	861	335	92.33	57.01	sp|P15019|TAL1_YEAST Transaldolase OS=Saccharomyces cerevisiae (strain ATCC 204508 / S288c) GN=TAL1 PE=1 SV=4	562	221.09	6.81362e-68	48.3	-1	1	795	0	4	194
TRINITY_DN4020_c0_g1	1	850	543	74.82	34.62	sp|E5A7I6|CBPYA_LEPMJ Carboxypeptidase Y homolog A OS=Leptosphaeria maculans (strain JN3 / isolate v23.1.3 / race Av1-4-5-6-7-8) GN=CPYA PE=3 SV=1	351	139.813	3.74176e-36	41.47	2	17	652	0	111	298
TRINITY_DN7896_c3_g5	1	839	512	72.23	30.27	sp|O13985|YEG3_SCHPO Uncharacterized WD repeat-containing protein C26H5.03 OS=Schizosaccharomyces pombe (strain 972 / ATCC 24843) GN=SPAC26H5.03 PE=1 SV=2	279	112.079	1.41251e-26	34.3	3	231	836	0	1	155
TRINITY_DN9201_c0_g2	1	821	892	74.54	22.65	sp|P49731|MCM6_SCHPO DNA replication licensing factor mcm6 OS=Schizosaccharomyces pombe (strain 972 / ATCC 24843) GN=mcm6 PE=1 SV=2	415	164.466	4.5614e-44	45.67	2	209	820	0	50	251
TRINITY_DN3440_c0_g2	1	815	437	86.5	55.38	sp|P02992|EFTU_YEAST Elongation factor Tu, mitochondrial OS=Saccharomyces cerevisiae (strain ATCC 204508 / S288c) GN=TUF1 PE=1 SV=1	865	337.806	3.06836e-112	66.94	2	110	814	0	2	243
TRINITY_DN3062_c0_g2	1	803	345	39.98	31.3	sp|Q9H3K2|GHITM_HUMAN Growth hormone-inducible transmembrane protein OS=Homo sapiens GN=GHITM PE=1 SV=2	196	80.1073	1.61263e-19	37.96	1	337	657	0	238	345
TRINITY_DN4434_c0_g2	1	792	553	89.02	44.48	sp|G5EB89|KAPA_EMENI Importin subunit alpha OS=Emericella nidulans (strain FGSC A4 / ATCC 38163 / CBS 112.46 / NRRL 194 / M139) GN=kapA PE=1 SV=1	687	269.24	2.15701e-84	63.82	-2	3	707	0	2	247
TRINITY_DN5289_c1_g1	1	788	743	94.8	33.51	sp|Q9UUH7|GYP7_SCHPO GTPase-activating protein gyp7 OS=Schizosaccharomyces pombe (strain 972 / ATCC 24843) GN=gyp7 PE=3 SV=1	247	99.7525	5.86607e-22	28.62	-2	41	787	0	241	489
TRINITY_DN4563_c0_g1	1	774	401	32.95	21.2	sp|Q8NKE2|AOX_CRYNH Alternative oxidase, mitochondrial OS=Cryptococcus neoformans var. grubii serotype A (strain H99 / ATCC 208821 / CBS 10515 / FGSC 9487) GN=AOX1 PE=3 SV=2	338	134.806	1.83775e-50	71.76	1	55	309	0	219	303
TRINITY_DN4858_c0_g4	1	769	910	55.01	11.43	sp|Q7KZF4|SND1_HUMAN Staphylococcal nuclease domain-containing protein 1 OS=Homo sapiens GN=SND1 PE=1 SV=1	201	82.0333	1.15245e-29	36.17	2	5	427	0	454	557
TRINITY_DN4505_c0_g1	1	764	141	43.98	59.57	sp|Q09196|MLR4_SCHPO Myosin regulatory light chain cdc4 OS=Schizosaccharomyces pombe (strain 972 / ATCC 24843) GN=cdc4 PE=1 SV=1	259	104.375	5.77928e-36	50	-2	158	493	0	55	138
TRINITY_DN551_c0_g1	1	749	334	88.92	66.17	sp|P17505|MDHM_YEAST Malate dehydrogenase, mitochondrial OS=Saccharomyces cerevisiae (strain ATCC 204508 / S288c) GN=MDH1 PE=1 SV=2	696	272.707	1.249e-88	64.41	-2	80	745	0	112	332
TRINITY_DN6190_c0_g2	1	738	335	36.99	25.37	sp|Q9ZWQ9|FLS_CITUN Flavonol synthase/flavanone 3-hydroxylase OS=Citrus unshiu GN=FLS PE=1 SV=1	132	55.4546	1.16291e-07	35.16	-1	301	573	0	219	303
TRINITY_DN3997_c0_g1	1	734	1193	84.6	17.27	sp|Q0CLK1|PYC_ASPTN Pyruvate carboxylase OS=Aspergillus terreus (strain NIH 2624 / FGSC A1156) GN=pyc PE=3 SV=2	653	256.144	1.42726e-76	57.49	1	112	732	0	816	1021
TRINITY_DN2201_c0_g1	1	716	684	88.83	30.85	sp|Q5R6Y0|HBS1L_PONAB HBS1-like protein OS=Pongo abelii GN=HBS1L PE=2 SV=1	550	216.468	8.7577e-64	49.53	-1	81	716	0	322	532
TRINITY_DN5301_c0_g1	1	695	516	22.45	10.08	sp|P49299|CYSZ_CUCMA Citrate synthase, glyoxysomal OS=Cucurbita maxima PE=1 SV=1	187	76.6406	4.26767e-28	61.54	-3	535	690	0	375	426
TRINITY_DN2783_c0_g1	1	691	489	42.55	20.25	sp|P37967|PNBA_BACSU Para-nitrobenzyl esterase OS=Bacillus subtilis (strain 168) GN=pnbA PE=1 SV=2	188	77.0258	4.5624e-19	41.75	1	70	363	0	6	104
TRINITY_DN10260_c0_g1	1	688	1208	24.42	4.64	sp|O94761|RECQ4_HUMAN ATP-dependent DNA helicase Q4 OS=Homo sapiens GN=RECQL4 PE=1 SV=1	125	52.7582	8.97628e-07	48.21	3	27	194	0	762	817
TRINITY_DN5387_c0_g2	1	667	273	71.51	56.04	sp|P46331|YXBG_BACSU Uncharacterized oxidoreductase YxbG OS=Bacillus subtilis (strain 168) GN=yxbG PE=3 SV=2	282	113.235	1.88207e-28	41.21	1	46	522	0	107	259
TRINITY_DN9645_c0_g1	1	654	598	98.62	31.44	sp|Q9UUG8|TUP12_SCHPO Transcriptional repressor tup12 OS=Schizosaccharomyces pombe (strain 972 / ATCC 24843) GN=tup12 PE=1 SV=2	528	207.994	1.69175e-61	50.92	-3	8	652	0	408	595
TRINITY_DN7524_c0_g3	1	649	456	98.46	35.53	sp|Q9D8W5|PSD12_MOUSE 26S proteasome non-ATPase regulatory subunit 12 OS=Mus musculus GN=Psmd12 PE=1 SV=4	300	120.168	2.92719e-30	33.8	-2	10	648	0	138	299
TRINITY_DN1254_c0_g1	1	594	395	32.83	16.2	sp|Q09692|SYWC_SCHPO Tryptophan--tRNA ligase, cytoplasmic OS=Schizosaccharomyces pombe (strain 972 / ATCC 24843) GN=wrs1 PE=1 SV=1	247	99.7525	2.15381e-23	64.62	1	379	573	0	5	68
TRINITY_DN6858_c0_g2	1	584	458	49.32	16.16	sp|Q8GAK7|ALDH_PAENI Aldehyde dehydrogenase OS=Paenarthrobacter nicotinovorans GN=aldh PE=1 SV=1	125	52.7582	4.72934e-07	37.5	2	203	490	0	373	446
TRINITY_DN4672_c0_g1	1	563	350	57.02	28.86	sp|P43067|ADH1_CANAX Alcohol dehydrogenase 1 OS=Candida albicans GN=ADH1 PE=1 SV=1	221	89.7373	3.73828e-20	44.86	-3	136	456	0	1	101
TRINITY_DN113_c0_g2	1	557	1066	36.09	6.29	sp|Q9Y8G7|C505_FUSOX Bifunctional cytochrome P450/NADPH--P450 reductase OS=Fusarium oxysporum GN=CYP505 PE=1 SV=1	173	71.2478	3.83147e-18	54.41	2	116	316	0	927	993
TRINITY_DN9203_c1_g2	1	546	1364	56.59	7.4	sp|Q9YHY6|CND1_XENLA Condensin complex subunit 1 OS=Xenopus laevis GN=ncapd2 PE=1 SV=1	193	78.9518	1.34016e-15	42.86	3	3	311	0	1176	1276
TRINITY_DN6681_c0_g1	1	511	500	89.82	26.8	sp|O74187|ALDH_AGABI Aldehyde dehydrogenase OS=Agaricus bisporus GN=aldA PE=3 SV=1	332	132.494	3.78276e-35	42.48	-1	2	460	0	38	171
TRINITY_DN211_c0_g1	1	491	165	67.21	64.85	sp|Q8TGW7|SKP1_ARTOT E3 ubiquitin ligase complex SCF subunit sconC OS=Arthroderma otae GN=sconC PE=2 SV=1	444	175.637	2.37564e-54	73.64	3	69	398	0	59	165
TRINITY_DN3693_c0_g1	1	483	230	57.76	40	sp|Q6NPL9|PLP3A_ARATH Thioredoxin domain-containing protein PLP3A OS=Arabidopsis thaliana GN=PLP3A PE=1 SV=1	223	90.5077	5.18142e-21	43.01	-1	1	279	0	65	156
TRINITY_DN4062_c0_g1	1	480	361	100	45.71	sp|Q6BM23|HEM3_DEBHA Porphobilinogen deaminase OS=Debaryomyces hansenii (strain ATCC 36239 / CBS 767 / JCM 1990 / NBRC 0083 / IGC 2968) GN=HEM3 PE=3 SV=1	425	168.318	3.0939e-49	55.76	-1	1	480	0	59	223
TRINITY_DN3812_c0_g3	1	467	234	75.8	48.72	sp|Q0CCF8|PLYF_ASPTN Probable pectate lyase F OS=Aspergillus terreus (strain NIH 2624 / FGSC A1156) GN=plyF PE=3 SV=1	300	120.168	3.37365e-32	53.39	-1	51	404	0	117	230
TRINITY_DN3583_c0_g1	1	438	116	25.34	31.9	sp|Q20507|ACBP3_CAEEL Acyl-CoA-binding protein homolog 3 OS=Caenorhabditis elegans GN=acbp-3 PE=3 SV=2	114	48.521	1.79244e-09	54.05	1	211	321	0	6	42
TRINITY_DN3983_c0_g1	1	436	220	28.9	19.09	sp|Q6NRM7|CHMP3_XENLA Charged multivesicular body protein 3 OS=Xenopus laevis GN=chmp3 PE=2 SV=3	123	51.9878	1.21785e-07	57.14	1	1	126	0	96	137
TRINITY_DN3477_c0_g1	1	427	371	80.8	29.11	sp|Q9UUE7|CDC73_SCHPO Cell division control protein 73 OS=Schizosaccharomyces pombe (strain 972 / ATCC 24843) GN=cdc73 PE=3 SV=1	144	60.077	6.02741e-10	32.77	-3	36	380	0	2	109
TRINITY_DN10252_c0_g1	1	406	328	79.8	32.62	sp|Q9I4V0|2NPD_PSEAE Nitronate monooxygenase OS=Pseudomonas aeruginosa (strain ATCC 15692 / DSM 22644 / CIP 104116 / JCM 14847 / LMG 12228 / 1C / PRS 101 / PAO1) GN=PA1024 PE=1 SV=1	279	112.079	1.05301e-28	50.93	3	3	326	0	211	317
TRINITY_DN7632_c0_g5	1	400	704	96	17.9	sp|Q9BYT8|NEUL_HUMAN Neurolysin, mitochondrial OS=Homo sapiens GN=NLN PE=1 SV=1	251	101.293	5.16939e-24	41.09	-3	6	389	0	173	298
TRINITY_DN8430_c0_g4	1	378	1657	88.89	7	sp|Q9JKF1|IQGA1_MOUSE Ras GTPase-activating-like protein IQGAP1 OS=Mus musculus GN=Iqgap1 PE=1 SV=2	207	84.3445	5.57763e-18	32.76	1	19	354	0	1143	1258
TRINITY_DN176_c0_g1	1	373	734	98.93	17.03	sp|O04514|OPT2_ARATH Oligopeptide transporter 2 OS=Arabidopsis thaliana GN=OPT2 PE=2 SV=2	181	74.3294	1.14136e-14	33.33	2	5	373	0	392	516
TRINITY_DN4838_c0_g2	1	366	350	73.77	24	sp|Q9SUR9|SGT1A_ARATH Protein SGT1 homolog A OS=Arabidopsis thaliana GN=SGT1A PE=1 SV=1	232	93.9745	2.29598e-22	51.11	-2	57	326	0	265	348
TRINITY_DN405_c0_g1	1	361	465	93.91	24.09	sp|S0ECK8|FUJ4_GIBF5 Fujikurins efflux protein FFUJ_12242 OS=Gibberella fujikuroi (strain CBS 195.34 / IMI 58289 / NRRL A-6831) GN=FFUJ_12242 PE=2 SV=1	142	59.3066	9.24546e-10	36.21	-3	21	359	0	334	445
TRINITY_DN1477_c0_g2	1	353	361	28.9	9.42	sp|Q9P6L7|YKQ9_SCHPO Uncharacterized mitochondrial carrier C688.09 OS=Schizosaccharomyces pombe (strain 972 / ATCC 24843) GN=SPAC688.09 PE=3 SV=1	128	53.9138	3.84244e-08	64.71	2	143	244	0	51	84
TRINITY_DN4759_c0_g2	1	349	379	61.89	13.72	sp|P48626|FAD3E_TOBAC Omega-3 fatty acid desaturase, endoplasmic reticulum OS=Nicotiana tabacum GN=FAD3 PE=2 SV=1	89	38.891	2.47536e-06	29.17	2	2	217	0	47	98
TRINITY_DN4284_c0_g1	1	344	295	54.94	21.36	sp|P38805|RPF1_YEAST Ribosome production factor 1 OS=Saccharomyces cerevisiae (strain ATCC 204508 / S288c) GN=RPF1 PE=1 SV=1	124	52.373	9.00386e-08	42.86	-3	31	219	0	8	70
TRINITY_DN1186_c0_g1	1	339	454	99.12	23.13	sp|Q5BB37|CARA_EMENI Carbamoyl-phosphate synthase arginine-specific small chain OS=Emericella nidulans (strain FGSC A4 / ATCC 38163 / CBS 112.46 / NRRL 194 / M139) GN=cpa-1 PE=2 SV=2	300	120.168	1.05269e-31	48.21	3	3	338	0	261	365
TRINITY_DN805_c0_g1	1	331	344	96.07	31.69	sp|O14405|GUN4_HYPJE Endoglucanase-4 OS=Hypocrea jecorina GN=cel61a PE=1 SV=1	223	90.5077	2.5513e-21	46.36	1	13	330	0	88	196
TRINITY_DN9895_c0_g1	1	329	296	78.42	27.03	sp|Q5ZID0|NMRL1_CHICK NmrA-like family domain-containing protein 1 OS=Gallus gallus GN=NMRAL1 PE=2 SV=1	144	60.077	1.88303e-10	40.7	1	34	291	0	1	80
TRINITY_DN9560_c0_g1	1	301	326	89.7	27.61	sp|Q9WVA3|BUB3_MOUSE Mitotic checkpoint protein BUB3 OS=Mus musculus GN=Bub3 PE=1 SV=2	239	96.6709	9.33434e-24	50	-3	3	272	0	4	93
TRINITY_DN4044_c0_g1	1	292	542	99.66	17.34	sp|Q09856|PRP3_SCHPO U4/U5/U6 small nuclear ribonucleoprotein prp3 OS=Schizosaccharomyces pombe (strain 972 / ATCC 24843) GN=prp3 PE=1 SV=1	148	61.6178	9.47864e-11	42.27	1	1	291	0	208	301
TRINITY_DN4188_c0_g4	1	288	976	98.96	9.73	sp|Q5APR8|CLA4_CANAL Serine/threonine-protein kinase CLA4 OS=Candida albicans (strain SC5314 / ATCC MYA-2876) GN=CLA4 PE=1 SV=1	411	162.925	5.84504e-46	76.84	-3	2	286	0	846	940
TRINITY_DN1824_c0_g1	1	283	236	75.27	30.08	sp|O74414|YJL1_SCHPO Uncharacterized protein C14G10.01 OS=Schizosaccharomyces pombe (strain 972 / ATCC 24843) GN=SPCC14G10.01 PE=1 SV=1	213	86.6557	1.60605e-20	50.7	1	7	219	0	53	123
TRINITY_DN2007_c0_g1	1	278	517	94.96	16.63	sp|P17549|CP53_ASPNG Benzoate 4-monooxygenase OS=Aspergillus niger GN=bphA PE=1 SV=1	160	66.2402	1.91588e-12	47.19	-1	3	266	0	285	370
TRINITY_DN991_c0_g1	1	254	437	83.86	16.25	sp|P50125|CYSD_EMENI Homocysteine synthase OS=Emericella nidulans (strain FGSC A4 / ATCC 38163 / CBS 112.46 / NRRL 194 / M139) GN=cysD PE=1 SV=2	172	70.8626	3.03366e-14	63.38	-2	41	253	0	39	109
TRINITY_DN9968_c0_g1	1	231	525	98.7	14.48	sp|P15828|GUX1_HUMGT Exoglucanase 1 OS=Humicola grisea var. thermoidea GN=CBH-1 PE=1 SV=2	321	128.257	4.61865e-35	76.32	-2	3	230	0	170	245
TRINITY_DN2558_c0_g1	1	228	515	96.05	14.17	sp|I6LDA6|GPMI_ONCVO 2,3-bisphosphoglycerate-independent phosphoglycerate mutase OS=Onchocerca volvulus GN=ipgm-1 PE=1 SV=1	308	123.25	2.6447e-33	76.71	3	9	227	0	331	403
TRINITY_DN8209_c0_g1	1	8341	340	12.62	96.18	sp|Q75A82|ANT1_ASHGO Peroxisomal adenine nucleotide transporter 1 OS=Ashbya gossypii (strain ATCC 10895 / CBS 109.51 / FGSC 9923 / NRRL Y-1056) GN=ANT1 PE=3 SV=1	347	138.272	6.73191e-33	30.35	3	108	1160	0	3	329
TRINITY_DN8849_c0_g1	1	6913	508	16.45	75.59	sp|P0DPA7|PSIH_PSICU Cytochrome P450 monooxygenase psiH OS=Psilocybe cubensis GN=psiH PE=1 SV=1	682	267.314	7.5536e-81	36.08	-3	192	1328	0	117	500
TRINITY_DN9303_c0_g6	1	6185	780	16.98	42.31	sp|O55106|STRN_MOUSE Striatin OS=Mus musculus GN=Strn PE=1 SV=2	655	256.914	2.10386e-69	38	-1	3708	4757	0	451	780
TRINITY_DN1769_c0_g1	1	5728	908	15.66	31.17	sp|Q9NBX4|RTXE_DROME Probable RNA-directed DNA polymerase from transposon X-element OS=Drosophila melanogaster GN=X-element\ORF2 PE=3 SV=1	266	107.071	8.27089e-22	26.33	-3	1476	2372	0	478	760
TRINITY_DN9139_c0_g2	1	4712	1012	25.47	39.82	sp|O94609|UBA1_SCHPO Ubiquitin-activating enzyme E1 1 OS=Schizosaccharomyces pombe (strain 972 / ATCC 24843) GN=ptr3 PE=1 SV=1	1214	472.241	1.20314e-142	55.94	-3	3511	4710	0	610	1012
TRINITY_DN8784_c0_g1	1	4431	436	26.13	88.99	sp|P42894|ENO_NEOFR Enolase OS=Neocallimastix frontalis PE=3 SV=1	1480	574.704	0	73.97	-1	1	1158	0	29	416
TRINITY_DN8857_c0_g2	1	4335	177	8.17	66.1	sp|Q9UTI3|ARD1_SCHPO N-terminal acetyltransferase A complex catalytic subunit ard1 OS=Schizosaccharomyces pombe (strain 972 / ATCC 24843) GN=ard1 PE=1 SV=1	436	172.555	6.69899e-51	69.49	-3	3674	4027	0	32	148
TRINITY_DN9070_c1_g1	1	4236	1296	42.78	43.44	sp|Q4P5R8|STU1_USTMA Protein STU1 OS=Ustilago maydis (strain 521 / FGSC 9021) GN=STU1 PE=3 SV=2	791	309.301	2.81127e-85	35.3	-2	2355	4166	0	1	563
TRINITY_DN8785_c0_g1	1	4159	807	38.09	63.32	sp|A6QLH6|SCYL1_BOVIN N-terminal kinase-like protein OS=Bos taurus GN=SCYL1 PE=2 SV=1	829	323.939	6.67162e-93	37.62	2	206	1789	0	29	539
TRINITY_DN8672_c0_g1	1	4006	675	44.86	92	sp|P0CN62|EXO84_CRYNJ Exocyst complex component EXO84 OS=Cryptococcus neoformans var. neoformans serotype D (strain JEC21 / ATCC MYA-565) GN=EXO84 PE=3 SV=1	766	299.671	7.55586e-86	35.76	3	1503	3299	0	32	652
TRINITY_DN7040_c0_g1	1	3916	657	14.71	27.7	sp|P39839|YUXL_BACSU Uncharacterized peptidase YuxL OS=Bacillus subtilis (strain 168) GN=yuxL PE=3 SV=3	211	85.8853	1.28783e-21	32.99	-3	1710	2285	0	472	653
TRINITY_DN6250_c0_g1	1	3865	606	9.62	20.46	sp|B0CQL7|PESC_LACBS Pescadillo homolog OS=Laccaria bicolor (strain S238N-H82 / ATCC MYA-4686) GN=NOP7 PE=3 SV=1	619	243.047	7.97338e-67	92.74	-2	1	372	0	1	124
TRINITY_DN9326_c0_g1	1	3792	516	40.43	98.64	sp|P13860|GUX1_PHACH Exoglucanase 1 OS=Phanerochaete chrysosporium GN=CBH1 PE=2 SV=1	1544	599.356	0	59.62	-1	1	1533	0	1	509
TRINITY_DN8109_c0_g2	1	3717	2371	69.98	33.66	sp|A2RRP1|NBAS_HUMAN Neuroblastoma-amplified sequence OS=Homo sapiens GN=NBAS PE=1 SV=2	283	113.62	8.11795e-24	20.5	-2	423	3023	0	571	1368
TRINITY_DN8114_c1_g1	1	3641	764	15.16	22.38	sp|O64642|URT1_ARATH UTP:RNA uridylyltransferase 1 OS=Arabidopsis thaliana GN=URT1 PE=1 SV=2	251	101.293	2.49359e-20	36.56	-1	1620	2171	0	516	686
TRINITY_DN8297_c1_g1	1	3572	721	15.87	25.38	sp|Q9Y7V2|BYE1_SCHPO Transcription factor bye1 OS=Schizosaccharomyces pombe (strain 972 / ATCC 24843) GN=bye1 PE=3 SV=3	199	81.2629	3.2218e-14	31.31	-2	587	1153	0	483	665
TRINITY_DN9260_c0_g2	1	3468	385	8.13	19.48	sp|Q01752|AAD_PHACH Aryl-alcohol dehydrogenase [NADP(+)] OS=Phanerochaete chrysosporium PE=1 SV=1	187	76.6406	3.20106e-13	45.74	1	1831	2112	0	264	338
TRINITY_DN2738_c0_g1	1	3406	1154	76.54	88.82	sp|Q4P3W3|DBP10_USTMA ATP-dependent RNA helicase DBP10 OS=Ustilago maydis (strain 521 / FGSC 9021) GN=DBP10 PE=3 SV=1	1961	759.985	0	44.67	-2	613	3219	0	104	1128
TRINITY_DN8189_c4_g1	1	3349	514	29.2	61.09	sp|Q8RWT8|SYSM_ARATH Serine--tRNA ligase, chloroplastic/mitochondrial OS=Arabidopsis thaliana GN=OVA7 PE=2 SV=1	517	203.756	4.76796e-82	36.81	-1	2186	3163	0	79	392
TRINITY_DN8238_c1_g1	1	3212	493	42.4	92.49	sp|Q8GXR2|PLT6_ARATH Probable polyol transporter 6 OS=Arabidopsis thaliana GN=PLT6 PE=2 SV=2	503	198.364	7.61761e-53	30.44	-2	428	1789	0	22	477
TRINITY_DN8448_c0_g2	1	3175	507	17.67	30.37	sp|Q9US37|YFZ4_SCHPO Uncharacterized transporter C1039.04 OS=Schizosaccharomyces pombe (strain 972 / ATCC 24843) GN=SPAC1039.04 PE=3 SV=1	328	130.954	1.09391e-54	37.43	2	545	1105	0	201	354
TRINITY_DN7335_c0_g1	1	3133	324	9.48	34.26	sp|Q6AZW2|A1A1A_DANRE Alcohol dehydrogenase [NADP(+)] A OS=Danio rerio GN=akr1a1a PE=2 SV=2	197	80.4925	7.29127e-27	36.94	-3	2295	2591	0	187	297
TRINITY_DN4322_c0_g1	1	2982	433	12.27	28.18	sp|P32561|RPD3_YEAST Histone deacetylase RPD3 OS=Saccharomyces cerevisiae (strain ATCC 204508 / S288c) GN=RPD3 PE=1 SV=1	519	204.527	1.13988e-134	77.87	-2	2223	2588	0	169	290
TRINITY_DN9064_c0_g1	1	2825	249	15.29	57.03	sp|Q0MQI9|NDUV2_PANTR NADH dehydrogenase [ubiquinone] flavoprotein 2, mitochondrial OS=Pan troglodytes GN=NDUFV2 PE=2 SV=1	481	189.889	6.45757e-56	60.42	1	472	903	0	52	193
TRINITY_DN8769_c0_g2	1	2794	737	32.43	37.58	sp|P87024|SKN1_CANAX Beta-glucan synthesis-associated protein SKN1 OS=Candida albicans GN=SKN1 PE=2 SV=1	595	233.802	1.31451e-63	42.43	2	1556	2461	0	458	734
TRINITY_DN7507_c0_g1	1	2764	742	28.33	34.37	sp|P49695|PKWA_THECU Probable serine/threonine-protein kinase PkwA OS=Thermomonospora curvata GN=pkwA PE=3 SV=1	316	126.331	1.95041e-28	32.46	-3	513	1295	0	487	741
TRINITY_DN7889_c0_g1	1	2668	711	49.14	60.34	sp|Q08225|DPP3_YEAST Probable dipeptidyl peptidase 3 OS=Saccharomyces cerevisiae (strain ATCC 204508 / S288c) GN=YOL057W PE=1 SV=1	624	244.973	2.79348e-86	37.53	2	83	1393	0	3	431
TRINITY_DN8666_c0_g3	1	2646	692	27.89	26.73	sp|O74252|STE12_EMENI Transcription factor steA OS=Emericella nidulans (strain FGSC A4 / ATCC 38163 / CBS 112.46 / NRRL 194 / M139) GN=steA PE=2 SV=1	626	245.743	3.87895e-68	51.22	3	516	1253	0	20	204
TRINITY_DN9105_c1_g1	1	2624	785	92.61	98.22	sp|P40900|ISP4_SCHPO Sexual differentiation process protein isp4 OS=Schizosaccharomyces pombe (strain 972 / ATCC 24843) GN=isp4 PE=2 SV=2	1672	648.662	0	41.81	-1	93	2522	0	11	781
TRINITY_DN2629_c0_g2	1	2576	878	12.34	11.85	sp|Q10337|BRC1_SCHPO BRCT-containing protein 1 OS=Schizosaccharomyces pombe (strain 972 / ATCC 24843) GN=brc1 PE=1 SV=1	202	82.4185	1.11357e-14	39.62	2	242	559	0	283	386
TRINITY_DN6933_c0_g1	1	2549	780	33.9	37.44	sp|C8V8H5|IES1_EMENI Ino eighty subunit 1 OS=Emericella nidulans (strain FGSC A4 / ATCC 38163 / CBS 112.46 / NRRL 194 / M139) GN=AN10560 PE=3 SV=1	483	190.66	2.39687e-49	38.08	-1	825	1688	0	35	326
TRINITY_DN5980_c0_g1	1	2528	382	43.91	90.31	sp|Q10058|YAM3_SCHPO Putative oxidoreductase C1F5.03c OS=Schizosaccharomyces pombe (strain 972 / ATCC 24843) GN=SPAC1F5.03c PE=3 SV=1	361	143.665	2.33209e-35	26.49	2	101	1210	0	2	346
TRINITY_DN8816_c0_g1	1	2481	587	21.52	24.87	sp|P07921|LACP_KLULA Lactose permease OS=Kluyveromyces lactis (strain ATCC 8585 / CBS 2359 / DSM 70799 / NBRC 1267 / NRRL Y-1140 / WM37) GN=LAC12 PE=3 SV=1	215	87.4261	2.01145e-16	30.56	2	1304	1837	0	155	300
TRINITY_DN7182_c0_g1	1	2463	857	65.41	61.61	sp|O31530|YETA_BACSU Uncharacterized protein YetA OS=Bacillus subtilis (strain 168) GN=yetA PE=4 SV=2	868	338.961	5.18716e-101	37.48	-2	75	1685	0	159	686
TRINITY_DN5688_c0_g1	1	2442	152	13.02	65.13	sp|Q9CWQ2|ZSWM7_MOUSE Zinc finger SWIM domain-containing protein 7 OS=Mus musculus GN=Zswim7 PE=2 SV=1	173	71.2478	1.44735e-12	37.38	-1	1798	2115	0	20	118
TRINITY_DN6691_c0_g1	1	2408	565	41.24	50.97	sp|O94556|APC8_SCHPO Anaphase-promoting complex subunit 8 OS=Schizosaccharomyces pombe (strain 972 / ATCC 24843) GN=cut23 PE=1 SV=2	690	270.396	1.05042e-78	45.35	1	670	1662	0	168	455
TRINITY_DN4876_c0_g1	1	2363	282	31.23	67.38	sp|O94480|BMT5_SCHPO 25S rRNA (uridine-N(3))-methyltransferase OS=Schizosaccharomyces pombe (strain 972 / ATCC 24843) GN=bmt5 PE=3 SV=1	320	127.872	8.20512e-31	33.6	-1	1458	2195	0	40	229
TRINITY_DN6803_c0_g1	1	2338	536	53.12	74.81	sp|P40996|SCD2_SCHPO Protein scd2/ral3 OS=Schizosaccharomyces pombe (strain 972 / ATCC 24843) GN=scd2 PE=4 SV=1	620	243.432	3.0319e-69	34.8	-1	1001	2242	0	15	415
TRINITY_DN7872_c0_g1	1	2295	179	20.92	87.71	sp|P56616|UBE2C_XENLA Ubiquitin-conjugating enzyme E2 C OS=Xenopus laevis GN=ube2c PE=1 SV=1	512	201.83	1.80271e-58	60.62	2	119	598	0	15	171
TRINITY_DN8833_c0_g1	1	2276	497	39.67	56.14	sp|P42041|ALDH_ALTAL Aldehyde dehydrogenase OS=Alternaria alternata GN=ALTA10 PE=1 SV=2	740	289.656	7.77754e-87	51.66	-3	1318	2220	0	3	281
TRINITY_DN7965_c0_g1	1	2256	337	19.68	43.92	sp|P37837|TALDO_HUMAN Transaldolase OS=Homo sapiens GN=TALDO1 PE=1 SV=2	227	92.0485	9.61212e-19	35.14	1	85	528	0	88	235
TRINITY_DN8294_c0_g2	1	2241	419	23.16	32.22	sp|Q9USW3|YHZ7_SCHPO Probable glycosidase C21B10.07 OS=Schizosaccharomyces pombe (strain 972 / ATCC 24843) GN=SPBC21B10.07 PE=3 SV=1	215	87.4261	2.17907e-25	32.95	2	971	1489	0	126	260
TRINITY_DN6084_c0_g1	1	2215	868	50.38	36.64	sp|Q8JHZ8|PALD_CHICK Paladin OS=Gallus gallus GN=PALD1 PE=2 SV=2	240	97.0561	2.22662e-19	26.96	2	608	1723	0	372	689
TRINITY_DN8590_c1_g2	1	2180	421	27.8	52.26	sp|P50325|CDA_AMYRO Chitin deacetylase OS=Amylomyces rouxii PE=1 SV=1	429	169.859	1.40078e-44	39.91	2	548	1153	0	131	350
TRINITY_DN7651_c0_g1	1	2146	547	40.26	44.97	sp|O74738|SET10_SCHPO Ribosomal lysine N-methyltransferase set10 OS=Schizosaccharomyces pombe (strain 972 / ATCC 24843) GN=set10 PE=3 SV=1	284	114.005	4.04848e-25	27.78	-1	974	1837	0	18	263
TRINITY_DN7355_c0_g1	1	2131	563	52.51	64.83	sp|P79066|LIP1_GEOFE Lipase 1 OS=Geotrichum fermentans GN=LIP1 PE=1 SV=1	343	136.732	1.41611e-32	30.47	1	1	1119	0	188	552
TRINITY_DN7736_c1_g1	1	2113	516	23.71	31.01	sp|O14360|NAF1_SCHPO H/ACA ribonucleoprotein complex non-core subunit NAF1 OS=Schizosaccharomyces pombe (strain 972 / ATCC 24843) GN=naf1 PE=1 SV=1	205	83.5741	1.79926e-15	31.14	2	389	889	0	206	365
TRINITY_DN3359_c0_g1	1	2097	757	46.78	43.06	sp|P54861|DNM1_YEAST Dynamin-related protein DNM1 OS=Saccharomyces cerevisiae (strain ATCC 204508 / S288c) GN=DNM1 PE=1 SV=1	1183	460.299	1.79263e-149	66.06	1	1	981	0	209	534
TRINITY_DN7170_c0_g1	1	2077	547	48.68	51.37	sp|C4QX80|PSD1_KOMPG Phosphatidylserine decarboxylase proenzyme 1, mitochondrial OS=Komagataella phaffii (strain GS115 / ATCC 20864) GN=PSD1 PE=3 SV=1	475	187.578	1.08445e-86	33.92	-1	650	1660	0	108	388
TRINITY_DN7141_c0_g3	1	2044	764	87.18	77.23	sp|Q9UT19|METE_SCHPO Probable 5-methyltetrahydropteroyltriglutamate--homocysteine methyltransferase OS=Schizosaccharomyces pombe (strain 972 / ATCC 24843) GN=met26 PE=1 SV=1	1820	705.671	0	58.49	-3	255	2036	0	175	764
TRINITY_DN6806_c1_g2	1	2029	2643	17.59	4.12	sp|E9Q4F7|ANR11_MOUSE Ankyrin repeat domain-containing protein 11 OS=Mus musculus GN=Ankrd11 PE=1 SV=1	195	79.7221	6.82198e-14	39.67	1	649	1005	0	168	276
TRINITY_DN22_c0_g1	1	2014	370	17.28	28.38	sp|D4AIC4|Y4018_ARTBC Probable aspartic-type endopeptidase ARB_04018 OS=Arthroderma benhamiae (strain ATCC MYA-4681 / CBS 112371) GN=ARB_04018 PE=3 SV=1	152	63.1586	3.33957e-09	30.65	-1	740	1087	0	255	359
TRINITY_DN8650_c0_g2	1	1998	350	15.47	31.43	sp|J5J924|OPS2_BEAB2 MFS transporter OpS2 OS=Beauveria bassiana (strain ARSEF 2860) GN=OpS2 PE=2 SV=1	151	62.7734	8.74972e-10	35.45	1	688	996	0	41	150
TRINITY_DN6928_c1_g1	1	1984	429	34.48	51.28	sp|A1CQZ0|MCA1A_ASPCL Metacaspase-1A OS=Aspergillus clavatus (strain ATCC 1007 / CBS 513.65 / DSM 816 / NCTC 3887 / NRRL 1) GN=casA PE=3 SV=2	345	137.502	1.33329e-33	39.13	-2	91	774	0	135	354
TRINITY_DN9224_c1_g1	1	1940	456	40.36	49.78	sp|O14229|SFC1_SCHPO Transcription factor tau subunit sfc1 OS=Schizosaccharomyces pombe (strain 972 / ATCC 24843) GN=sfc1 PE=1 SV=2	304	121.709	3.86819e-28	30.04	-2	275	1057	0	147	373
TRINITY_DN8546_c0_g1	1	1923	317	22.78	38.49	sp|Q5GFD9|IMPCT_RAT Protein IMPACT OS=Rattus norvegicus GN=Impact PE=1 SV=1	227	92.0485	6.29375e-19	34.93	3	189	626	0	177	298
TRINITY_DN7261_c0_g1	1	1891	1723	99.95	41.44	sp|Q4PI89|SPT6_USTMA Transcription elongation factor SPT6 OS=Ustilago maydis (strain 521 / FGSC 9021) GN=SPT6 PE=3 SV=1	945	368.622	5.32775e-110	33.29	-2	1	1890	0	294	1007
TRINITY_DN5909_c0_g1	1	1879	438	70.09	93.61	sp|P49075|GUX3_AGABI Exoglucanase 3 OS=Agaricus bisporus GN=cel3 PE=1 SV=1	1453	564.303	0	68.11	1	493	1809	0	1	410
TRINITY_DN6363_c0_g1	1	1865	347	55.34	99.14	sp|P36408|GBB_DICDI Guanine nucleotide-binding protein subunit beta OS=Dictyostelium discoideum GN=gpbA PE=1 SV=1	1336	519.235	2.59141e-179	72.54	-2	374	1405	0	4	347
TRINITY_DN7240_c0_g1	1	1850	1254	50.43	25.28	sp|Q8L5R3|TBCD_ARATH Tubulin-folding cofactor D OS=Arabidopsis thaliana GN=TFCD PE=2 SV=1	225	91.2781	1.04045e-17	25.15	-1	588	1520	0	771	1087
TRINITY_DN2511_c0_g1	1	1812	537	53.48	47.3	sp|C7YQJ2|CBPYA_NECH7 Carboxypeptidase Y homolog A OS=Nectria haematococca (strain 77-13-4 / ATCC MYA-4622 / FGSC 9596 / MPVI) GN=CPYA PE=3 SV=1	312	124.79	1.14796e-46	28.17	2	842	1810	0	268	521
TRINITY_DN6269_c0_g1	1	1803	239	35.44	74.48	sp|P81296|RNL2_LENED Ribonuclease Le2 OS=Lentinula edodes PE=1 SV=1	494	194.897	6.40945e-56	50.7	-1	4	642	0	35	212
TRINITY_DN7022_c0_g1	1	1788	992	16.61	10.48	sp|P87152|SPT7_SCHPO Transcriptional activator spt7 OS=Schizosaccharomyces pombe (strain 972 / ATCC 24843) GN=spt7 PE=1 SV=2	221	89.7373	2.5175e-17	45.19	2	242	538	0	336	439
TRINITY_DN7559_c0_g2	1	1776	433	36.66	47.11	sp|Q12463|TRM11_YEAST tRNA (guanine(10)-N2)-methyltransferase OS=Saccharomyces cerevisiae (strain ATCC 204508 / S288c) GN=TRM11 PE=1 SV=1	293	117.472	1.31098e-37	37.39	-1	820	1470	0	229	432
TRINITY_DN7685_c1_g1	1	1766	529	65.4	73.53	sp|A1CFL6|PATI_ASPCL Cytochrome P450 monooxygenase patI OS=Aspergillus clavatus (strain ATCC 1007 / CBS 513.65 / DSM 816 / NCTC 3887 / NRRL 1) GN=patI PE=1 SV=2	584	229.565	1.08245e-65	34.35	1	610	1764	0	6	394
TRINITY_DN6500_c0_g1	1	1755	116	12.31	62.93	sp|O43034|YGU5_SCHPO Uncharacterized protein C3B9.05 OS=Schizosaccharomyces pombe (strain 972 / ATCC 24843) GN=SPBC3B9.05 PE=4 SV=2	240	97.0561	4.01535e-22	58.9	-3	1283	1498	0	3	75
TRINITY_DN3344_c0_g1	1	1721	140	18.83	73.57	sp|Q58922|Y1527_METJA UPF0132 membrane protein MJ1527 OS=Methanocaldococcus jannaschii (strain ATCC 43067 / DSM 2661 / JAL-1 / JCM 10045 / NBRC 100440) GN=MJ1527 PE=3 SV=1	129	54.299	2.61337e-07	33.94	1	391	714	0	35	137
TRINITY_DN3226_c0_g1	1	1707	1230	40.42	16.1	sp|O00411|RPOM_HUMAN DNA-directed RNA polymerase, mitochondrial OS=Homo sapiens GN=POLRMT PE=1 SV=2	482	190.274	5.9116e-85	42.49	2	401	1090	0	994	1191
TRINITY_DN6711_c0_g1	1	1673	576	36.04	34.72	sp|D8Q9M3|AMYG_SCHCM Glucoamylase ARB_02327-1 OS=Schizophyllum commune (strain H4-8 / FGSC 9210) GN=SCHCODRAFT_57589 PE=1 SV=1	587	230.72	1.5415e-125	56.22	-1	3	605	0	247	446
TRINITY_DN8298_c0_g2	1	1597	523	14.09	17.59	sp|P52719|PEPS_ASPPH Carboxypeptidase cpdS OS=Aspergillus phoenicis GN=cpdS PE=1 SV=1	131	55.0694	9.85139e-07	40	3	291	515	0	427	518
TRINITY_DN5326_c0_g2	1	1575	483	81.71	89.44	sp|O59816|ODP2_SCHPO Dihydrolipoyllysine-residue acetyltransferase component of pyruvate dehydrogenase complex, mitochondrial OS=Schizosaccharomyces pombe (strain 972 / ATCC 24843) GN=lat1 PE=3 SV=1	1000	389.808	4.33689e-128	47.84	-3	119	1405	0	52	483
TRINITY_DN5059_c0_g1	1	1550	692	42	31.21	sp|P12807|AMO_PICAN Peroxisomal primary amine oxidase OS=Pichia angusta GN=AMO PE=1 SV=1	382	151.754	7.07796e-43	41.63	-2	899	1549	0	406	621
TRINITY_DN2640_c0_g2	1	1532	519	81.85	75.14	sp|P43083|CP52V_CANAP Cytochrome P450 52E1 OS=Candida apicola GN=CYP52E1 PE=3 SV=1	696	272.707	8.50891e-83	38.06	1	259	1512	0	94	483
TRINITY_DN4661_c0_g1	1	1513	219	11.3	27.85	sp|Q07326|PIGF_HUMAN Phosphatidylinositol-glycan biosynthesis class F protein OS=Homo sapiens GN=PIGF PE=1 SV=1	134	56.225	1.10391e-07	40.98	1	976	1146	0	143	203
TRINITY_DN8928_c0_g1	1	1493	1502	36.17	10.65	sp|Q9UKJ3|GPTC8_HUMAN G patch domain-containing protein 8 OS=Homo sapiens GN=GPATCH8 PE=1 SV=2	263	105.916	1.27509e-22	33.15	-3	703	1242	0	11	170
TRINITY_DN7176_c0_g1	1	1481	794	72.32	40.3	sp|Q9UBV2|SE1L1_HUMAN Protein sel-1 homolog 1 OS=Homo sapiens GN=SEL1L PE=1 SV=3	261	105.145	1.37346e-22	28.5	3	405	1475	0	210	529
TRINITY_DN865_c0_g1	1	1441	825	17.07	10.3	sp|P10563|QUTA_EMENI Quinic acid utilization activator OS=Emericella nidulans (strain FGSC A4 / ATCC 38163 / CBS 112.46 / NRRL 194 / M139) GN=qutA PE=4 SV=2	139	58.151	1.18616e-07	39.77	-1	1169	1414	0	18	102
TRINITY_DN4570_c0_g1	1	1430	385	35.87	46.49	sp|P0CM34|ATG3_CRYNJ Autophagy-related protein 3 OS=Cryptococcus neoformans var. neoformans serotype D (strain JEC21 / ATCC MYA-565) GN=ATG3 PE=3 SV=1	470	185.652	1.07637e-51	56.67	2	836	1348	0	204	382
TRINITY_DN4083_c0_g2	1	1422	858	34.39	17.13	sp|P43553|ALR2_YEAST Magnesium transporter ALR2 OS=Saccharomyces cerevisiae (strain ATCC 204508 / S288c) GN=ALR2 PE=1 SV=1	285	114.39	1.35576e-25	34.36	2	932	1420	0	453	599
TRINITY_DN4934_c0_g1	1	1391	313	66.86	99.04	sp|O94524|GTO2_SCHPO Glutathione S-transferase omega-like 2 OS=Schizosaccharomyces pombe (strain 972 / ATCC 24843) GN=gto2 PE=3 SV=1	912	355.91	3.59549e-118	57.64	3	321	1250	0	2	311
TRINITY_DN7734_c1_g1	1	1384	240	30.35	62.92	sp|O13903|RRP40_SCHPO Exosome complex component rrp40 OS=Schizosaccharomyces pombe (strain 972 / ATCC 24843) GN=rrp40 PE=3 SV=1	314	125.561	1.70629e-31	46.15	2	425	844	0	68	218
TRINITY_DN5425_c0_g1	1	1349	366	79.17	97.27	sp|P32473|ODPB_YEAST Pyruvate dehydrogenase E1 component subunit beta, mitochondrial OS=Saccharomyces cerevisiae (strain ATCC 204508 / S288c) GN=PDB1 PE=1 SV=2	1257	488.804	1.06019e-169	65.55	1	151	1218	0	8	363
TRINITY_DN2755_c0_g2	1	1341	556	45.19	33.99	sp|Q9LF97|Y3295_ARATH CBS domain-containing protein CBSCBSPB3 OS=Arabidopsis thaliana GN=CBSCBSPB3 PE=1 SV=1	327	130.568	1.01595e-31	36.63	-3	734	1339	0	168	356
TRINITY_DN9164_c1_g2	1	1333	256	35.11	59.77	sp|Q9RPT1|RHLG_PSEAE Rhamnolipids biosynthesis 3-oxoacyl-[acyl-carrier-protein] reductase OS=Pseudomonas aeruginosa (strain ATCC 15692 / DSM 22644 / CIP 104116 / JCM 14847 / LMG 12228 / 1C / PRS 101 / PAO1) GN=rhlG PE=1 SV=1	287	115.161	7.36293e-28	41.03	2	113	580	0	5	157
TRINITY_DN7264_c0_g2	1	1311	328	38.9	50.91	sp|A3MX05|ILVC_PYRCJ Ketol-acid reductoisomerase (NADP(+)) OS=Pyrobaculum calidifontis (strain JCM 11548 / VA1) GN=ilvC PE=3 SV=1	364	144.821	1.1382e-37	46.47	-2	765	1274	0	2	168
TRINITY_DN9015_c0_g5	1	1305	350	60.46	74.29	sp|Q3UNZ8|QORL2_MOUSE Quinone oxidoreductase-like protein 2 OS=Mus musculus PE=1 SV=1	371	147.517	1.69096e-38	40.45	1	145	933	0	28	287
TRINITY_DN6564_c0_g1	1	1295	273	72.97	100	sp|Q07505|DLHH_YEAST Putative carboxymethylenebutenolidase OS=Saccharomyces cerevisiae (strain ATCC 204508 / S288c) GN=YDL086W PE=1 SV=1	690	270.396	5.65097e-86	49.84	-2	224	1168	0	1	273
TRINITY_DN4350_c0_g2	1	1288	1953	96.43	20.43	sp|O43065|MOT1_SCHPO Probable helicase mot1 OS=Schizosaccharomyces pombe (strain 972 / ATCC 24843) GN=mot1 PE=1 SV=4	1210	470.7	1.33938e-148	53.12	-2	1	1242	0	1169	1567
TRINITY_DN9340_c0_g1	1	1280	967	17.81	7.86	sp|O14111|PSD3_SCHPO Phosphatidylserine decarboxylase proenzyme 3 OS=Schizosaccharomyces pombe (strain 972 / ATCC 24843) GN=psd3 PE=3 SV=2	245	98.9821	8.06648e-21	56.58	1	1	228	0	855	930
TRINITY_DN8654_c0_g2	1	1247	524	55.81	46.18	sp|Q5FVQ9|TBCE_RAT Tubulin-specific chaperone E OS=Rattus norvegicus GN=Tbce PE=2 SV=1	190	77.7962	3.84278e-14	28.97	2	254	949	0	110	351
TRINITY_DN8805_c0_g2	1	1233	521	90.51	71.59	sp|I1RNL0|C9MT2_GIBZE Sphingolipid C9-methyltransferase 2 OS=Gibberella zeae (strain PH-1 / ATCC MYA-4620 / FGSC 9075 / NRRL 31084) GN=MT2 PE=3 SV=1	1024	399.053	6.94652e-133	49.87	-1	97	1212	0	18	390
TRINITY_DN9154_c1_g3	1	1218	329	21.43	27.96	sp|Q09704|RRP4_SCHPO Exosome complex component rrp4 OS=Schizosaccharomyces pombe (strain 972 / ATCC 24843) GN=rrp4 PE=3 SV=1	352	140.198	2.23748e-57	69.57	-1	328	588	0	106	197
TRINITY_DN5959_c0_g2	1	1212	342	88.86	94.15	sp|P0CR14|CWC2_CRYNJ Pre-mRNA-splicing factor CWC2 OS=Cryptococcus neoformans var. neoformans serotype D (strain JEC21 / ATCC MYA-565) GN=CWC2 PE=3 SV=1	830	324.324	2.36191e-106	47.37	-3	8	1084	0	10	331
TRINITY_DN9162_c0_g1	1	1197	110	19.3	71.82	sp|P53305|RT27_YEAST Mitochondrial 37S ribosomal protein S27 OS=Saccharomyces cerevisiae (strain ATCC 204508 / S288c) GN=RSM27 PE=1 SV=1	154	63.929	5.36059e-11	39.24	-2	909	1139	0	3	81
TRINITY_DN5501_c0_g1	1	1190	279	61.26	83.87	sp|P0CN06|DCN1_CRYNJ Defective in cullin neddylation protein 1 OS=Cryptococcus neoformans var. neoformans serotype D (strain JEC21 / ATCC MYA-565) GN=DCN1 PE=3 SV=1	376	149.443	4.48246e-40	36.11	1	259	987	0	26	259
TRINITY_DN6460_c0_g1	1	1161	274	24.29	34.31	sp|O60082|YQK8_SCHPO Uncharacterized protein C1494.08c OS=Schizosaccharomyces pombe (strain 972 / ATCC 24843) GN=SPCC1494.08c PE=4 SV=1	128	53.9138	6.95158e-07	35.42	-3	524	805	0	101	194
TRINITY_DN5657_c0_g2	1	1148	743	21.17	9.96	sp|P36148|GPT2_YEAST Glycerol-3-phosphate O-acyltransferase 2 OS=Saccharomyces cerevisiae (strain ATCC 204508 / S288c) GN=GPT2 PE=1 SV=1	104	44.669	4.05263e-09	33.33	-3	355	597	0	237	310
TRINITY_DN5874_c0_g2	1	1143	900	24.15	8.11	sp|Q9UUD1|SREBP_SCHPO Sterol regulatory element-binding protein 1 OS=Schizosaccharomyces pombe (strain 972 / ATCC 24843) GN=sre1 PE=1 SV=1	141	58.9214	4.45757e-08	38.71	-1	1	276	0	258	330
TRINITY_DN3251_c0_g1	1	1137	258	15.83	23.26	sp|Q01200|PRIA_LENED Protein priA OS=Lentinula edodes GN=priA PE=2 SV=1	211	85.8853	6.91866e-18	65	-1	1	180	0	180	239
TRINITY_DN9203_c0_g1	1	1129	1158	44.64	14.42	sp|O94679|CND1_SCHPO Condensin complex subunit 1 OS=Schizosaccharomyces pombe (strain 972 / ATCC 24843) GN=cnd1 PE=1 SV=1	327	130.568	4.04404e-31	38.69	-2	40	543	0	153	319
TRINITY_DN1430_c0_g1	1	1120	665	34.29	16.39	sp|Q10951|BYR4_SCHPO Protein byr4 OS=Schizosaccharomyces pombe (strain 972 / ATCC 24843) GN=byr4 PE=1 SV=1	217	88.1965	1.3144e-17	36.72	-1	698	1081	0	471	579
TRINITY_DN6008_c0_g3	1	1093	763	29.37	11.4	sp|Q9R101|LIPS_ICTTR Hormone-sensitive lipase OS=Ictidomys tridecemlineatus GN=LIPE PE=2 SV=1	172	70.8626	5.49602e-12	37.38	3	768	1088	0	332	418
TRINITY_DN8930_c0_g2	1	1065	238	19.15	28.15	sp|Q86YN1|DOPP1_HUMAN Dolichyldiphosphatase 1 OS=Homo sapiens GN=DOLPP1 PE=2 SV=1	103	44.2838	1.97397e-08	36.76	2	452	655	0	88	154
TRINITY_DN6937_c0_g1	1	1053	286	49.86	51.75	sp|Q9W2N0|CAPZA_DROME F-actin-capping protein subunit alpha OS=Drosophila melanogaster GN=cpa PE=2 SV=1	243	98.2117	1.03843e-26	34.25	-3	2	526	0	119	266
TRINITY_DN7469_c0_g2	1	1049	599	56.63	30.88	sp|Q10110|RRN3_SCHPO RNA polymerase I-specific transcription initiation factor rrn3 OS=Schizosaccharomyces pombe (strain 972 / ATCC 24843) GN=rrn3 PE=3 SV=1	244	98.5969	2.76961e-21	34.65	-3	130	723	0	65	249
TRINITY_DN7922_c0_g1	1	1031	357	15.42	14.29	sp|Q5BCX8|EGLD_EMENI Endo-beta-1,4-glucanase D OS=Emericella nidulans (strain FGSC A4 / ATCC 38163 / CBS 112.46 / NRRL 194 / M139) GN=eglD PE=1 SV=1	154	63.929	1.25431e-26	58.49	-2	398	556	0	118	168
TRINITY_DN9232_c0_g4	1	1013	286	12.44	13.99	sp|Q99390|YPT2_ECOLX Uncharacterized 31.7 kDa protein in traX-finO intergenic region OS=Escherichia coli PE=3 SV=1	94	40.817	3.03049e-07	45.24	-3	718	843	0	79	118
TRINITY_DN5106_c0_g1	1	1002	740	18.26	8.24	sp|P87023|KRE6_CANAX Beta-glucan synthesis-associated protein KRE6 OS=Candida albicans GN=KRE6 PE=2 SV=1	187	76.6406	8.07342e-26	52.46	2	383	565	0	657	717
TRINITY_DN2009_c0_g3	1	995	952	35.28	11.55	sp|Q03194|PMA4_NICPL Plasma membrane ATPase 4 OS=Nicotiana plumbaginifolia GN=PMA4 PE=2 SV=1	234	94.7449	6.28796e-20	48.31	-2	626	976	0	736	845
TRINITY_DN2795_c0_g1	1	976	193	29.82	49.74	sp|P61589|RHOA_RAT Transforming protein RhoA OS=Rattus norvegicus GN=Rhoa PE=1 SV=1	261	105.145	1.28629e-53	54.08	-2	178	468	0	98	193
TRINITY_DN5698_c0_g1	1	949	487	95.79	56.88	sp|Q5ATG7|APDF_EMENI Aspyridones efflux protein apdF OS=Emericella nidulans (strain FGSC A4 / ATCC 38163 / CBS 112.46 / NRRL 194 / M139) GN=apdF PE=2 SV=1	340	135.576	1.81665e-34	39.14	-3	15	923	0	1	277
TRINITY_DN7632_c0_g4	1	939	712	93.93	41.99	sp|P25375|PRTD_YEAST Saccharolysin OS=Saccharomyces cerevisiae (strain ATCC 204508 / S288c) GN=PRD1 PE=1 SV=1	684	268.085	8.15657e-82	47.49	3	15	896	0	410	708
TRINITY_DN980_c0_g1	1	918	419	59.15	43.2	sp|Q9USW3|YHZ7_SCHPO Probable glycosidase C21B10.07 OS=Schizosaccharomyces pombe (strain 972 / ATCC 24843) GN=SPBC21B10.07 PE=3 SV=1	321	128.257	3.50195e-32	39.13	-3	248	790	0	237	417
TRINITY_DN8486_c3_g3	1	906	473	69.21	40.8	sp|A7UX13|EGT2_NEUCR Hercynylcysteine sulfoxide lyase OS=Neurospora crassa (strain ATCC 24698 / 74-OR23-1A / CBS 708.71 / DSM 1257 / FGSC 987) GN=egt-2 PE=1 SV=1	238	96.2857	8.96942e-22	29.86	-1	1	627	0	46	238
TRINITY_DN2796_c0_g1	1	880	176	36.82	64.2	sp|P0CT69|RL20B_SCHPO 60S ribosomal protein L20-B OS=Schizosaccharomyces pombe (strain 972 / ATCC 24843) GN=rpl2002 PE=1 SV=1	404	160.229	1.4165e-57	68.14	1	433	756	0	63	175
TRINITY_DN4901_c0_g5	1	874	1469	89.24	14.91	sp|Q9P7V2|ABC4_SCHPO ATP-binding cassette transporter abc4 OS=Schizosaccharomyces pombe (strain 972 / ATCC 24843) GN=abc4 PE=3 SV=1	212	86.2705	2.9988e-17	26.34	1	94	873	0	939	1157
TRINITY_DN4639_c0_g2	1	870	796	13.79	5.03	sp|P39956|RPH1_YEAST DNA damage-responsive transcriptional repressor RPH1 OS=Saccharomyces cerevisiae (strain ATCC 204508 / S288c) GN=RPH1 PE=1 SV=1	147	61.2326	6.77745e-19	57.5	-3	713	832	0	13	52
TRINITY_DN9056_c0_g5	1	850	549	45.18	23.13	sp|P32948|LIP4_DIURU Lipase 4 OS=Diutina rugosa GN=LIP4 PE=3 SV=1	373	148.288	8.78004e-42	57.03	1	1	384	0	317	443
TRINITY_DN86_c0_g1	1	844	230	57.94	72.61	sp|P35200|UPS2_YEAST Protein UPS2, mitochondrial OS=Saccharomyces cerevisiae (strain ATCC 204508 / S288c) GN=UPS2 PE=1 SV=1	283	113.62	3.01057e-28	35.12	-3	129	617	0	13	179
TRINITY_DN4053_c0_g2	1	839	258	52.56	53.88	sp|P97376|FRG1_MOUSE Protein FRG1 OS=Mus musculus GN=Frg1 PE=1 SV=2	138	57.7658	1.61165e-08	29.53	3	399	839	0	111	249
TRINITY_DN2470_c0_g2	1	821	284	55.54	53.17	sp|O94628|YGE9_SCHPO Uncharacterized methyltransferase C1347.09 OS=Schizosaccharomyces pombe (strain 972 / ATCC 24843) GN=SPBC1347.09 PE=3 SV=1	224	90.8929	5.53563e-20	35.48	-3	151	606	0	89	239
TRINITY_DN9322_c0_g3	1	803	342	34.74	26.32	sp|Q12068|GRE2_YEAST NADPH-dependent methylglyoxal reductase GRE2 OS=Saccharomyces cerevisiae (strain ATCC 204508 / S288c) GN=GRE2 PE=1 SV=1	137	57.3806	3.2442e-08	34.04	2	455	733	0	239	328
TRINITY_DN8865_c0_g1	1	792	436	60.61	37.84	sp|A1C8U0|MANF_ASPCL Mannan endo-1,4-beta-mannosidase F OS=Aspergillus clavatus (strain ATCC 1007 / CBS 513.65 / DSM 816 / NCTC 3887 / NRRL 1) GN=manF PE=3 SV=1	186	76.2554	1.82726e-14	36.14	2	215	694	0	23	187
TRINITY_DN4051_c0_g1	1	783	503	92.72	44.93	sp|P58781|ADA2_DANRE Adenosine deaminase 2-A OS=Danio rerio GN=ada2a PE=2 SV=2	392	155.606	3.92939e-42	37.04	-2	57	782	0	196	421
TRINITY_DN4968_c0_g2	1	778	536	99.1	45.34	sp|Q4WAZ6|FMAG_ASPFU Multifunctional cytochrome P450 monooxygenase af510 OS=Neosartorya fumigata (strain ATCC MYA-4609 / Af293 / CBS 101355 / FGSC A1100) GN=af510 PE=1 SV=1	164	67.781	1.25684e-11	21.72	2	2	772	0	79	321
TRINITY_DN6084_c0_g8	1	764	1123	95.42	21.99	sp|Q6A548|TERT_CANLF Telomerase reverse transcriptase OS=Canis lupus familiaris GN=TERT PE=2 SV=1	442	174.866	1.11881e-47	37.75	3	3	731	0	761	1007
TRINITY_DN4910_c0_g2	1	758	173	59.37	86.71	sp|Q7SI16|ATP7_NEUCR ATP synthase subunit d, mitochondrial OS=Neurospora crassa (strain ATCC 24698 / 74-OR23-1A / CBS 708.71 / DSM 1257 / FGSC 987) GN=atp7 PE=3 SV=1	416	164.851	1.22111e-48	56	3	3	452	0	24	173
TRINITY_DN2039_c0_g1	1	754	357	94.69	67.79	sp|P17423|KHSE_YEAST Homoserine kinase OS=Saccharomyces cerevisiae (strain ATCC 204508 / S288c) GN=THR1 PE=1 SV=4	574	225.713	5.92788e-70	52.87	-1	2	715	0	3	244
TRINITY_DN8012_c0_g1	1	745	138	18.12	30.43	sp|Q54MV7|NDUAC_DICDI NADH dehydrogenase [ubiquinone] 1 alpha subcomplex subunit 12 OS=Dictyostelium discoideum GN=ndufa12 PE=2 SV=2	103	44.2838	1.34406e-07	42.22	-2	151	285	0	71	112
TRINITY_DN3875_c0_g1	1	725	73	31.45	83.56	sp|P38636|ATX1_YEAST Metal homeostasis factor ATX1 OS=Saccharomyces cerevisiae (strain ATCC 204508 / S288c) GN=ATX1 PE=1 SV=1	169	69.707	2.87338e-14	53.95	2	323	550	0	10	70
TRINITY_DN7160_c0_g2	1	716	888	59.5	15.65	sp|Q29RT6|KI20A_BOVIN Kinesin-like protein KIF20A OS=Bos taurus GN=KIF20A PE=2 SV=1	246	99.3673	5.33835e-22	40.26	-3	22	447	0	54	192
TRINITY_DN6355_c0_g1	1	700	439	77.57	41	sp|P48601|PRS4_DROME 26S proteasome regulatory subunit 4 OS=Drosophila melanogaster GN=Rpt2 PE=1 SV=2	686	268.855	4.72585e-86	70.49	-2	25	567	0	24	203
TRINITY_DN4058_c0_g2	1	695	235	68.2	68.09	sp|A7HLB6|RL1_FERNB 50S ribosomal protein L1 OS=Fervidobacterium nodosum (strain ATCC 35602 / DSM 5306 / Rt17-B1) GN=rplA PE=3 SV=1	236	95.5153	4.59707e-22	36.69	-3	13	486	0	14	173
TRINITY_DN4983_c0_g2	1	674	1661	56.97	7.95	sp|P32386|YBT1_YEAST ATP-dependent bile acid permease OS=Saccharomyces cerevisiae (strain ATCC 204508 / S288c) GN=YBT1 PE=1 SV=2	329	131.339	9.90075e-33	46.21	3	291	674	0	707	838
TRINITY_DN1670_c0_g1	1	666	409	46.4	25.43	sp|Q8N4J0|CARME_HUMAN Carnosine N-methyltransferase OS=Homo sapiens GN=CARNMT1 PE=1 SV=1	214	87.0409	1.59061e-18	39.62	-3	2	310	0	150	253
TRINITY_DN1255_c0_g1	1	653	547	33.54	13.53	sp|P46950|SNG1_YEAST Nitrosoguanidine resistance protein SNG1 OS=Saccharomyces cerevisiae (strain ATCC 204508 / S288c) GN=SNG1 PE=1 SV=1	119	50.447	3.80933e-10	32.43	-1	171	389	0	437	510
TRINITY_DN7121_c0_g3	1	624	773	93.75	26.78	sp|Q4PE39|SEC23_USTMA Protein transport protein SEC23 OS=Ustilago maydis (strain 521 / FGSC 9021) GN=SEC23 PE=3 SV=1	753	294.664	5.05323e-93	69.86	-2	3	587	0	130	336
TRINITY_DN5426_c0_g8	1	612	1066	97.55	18.76	sp|Q01317|NUC2_NEUCR Ankyrin repeat protein nuc-2 OS=Neurospora crassa (strain ATCC 24698 / 74-OR23-1A / CBS 708.71 / DSM 1257 / FGSC 987) GN=nuc-2 PE=4 SV=2	348	138.658	9.53889e-36	39.22	3	9	605	0	324	523
TRINITY_DN154_c0_g1	1	601	363	58.4	32.78	sp|O13704|YEU5_SCHPO Thioredoxin domain-containing protein C13F5.05, mitochondrial OS=Schizosaccharomyces pombe (strain 972 / ATCC 24843) GN=SPAC13F5.05 PE=4 SV=2	167	68.9366	1.30388e-12	31.93	3	3	353	0	72	190
TRINITY_DN5123_c0_g1	1	594	278	85.35	63.67	sp|P14964|PYRF_SCHCO Orotidine 5&apos;-phosphate decarboxylase OS=Schizophyllum commune GN=URA1 PE=3 SV=1	567	223.016	8.14566e-71	70.62	3	3	509	0	100	276
TRINITY_DN3093_c0_g1	1	587	387	85.35	41.34	sp|P42698|DR111_ARATH DNA-damage-repair/toleration protein DRT111, chloroplastic OS=Arabidopsis thaliana GN=DRT111 PE=1 SV=2	242	97.8265	9.33068e-23	40.23	-1	54	554	0	218	377
TRINITY_DN2269_c0_g1	1	571	583	81.44	26.24	sp|P0CT24|GLU2B_USTMA Glucosidase 2 subunit beta OS=Ustilago maydis (strain 521 / FGSC 9021) GN=UMAG_12045 PE=3 SV=1	344	137.117	2.96156e-36	41.94	-3	102	566	0	410	562
TRINITY_DN8647_c0_g1	1	563	517	69.8	23.02	sp|A0A1D3PCM3|SST_EMEND Serine O-succinyltransferase OS=Emericella nidulans GN=CysA PE=1 SV=1	409	162.155	2.30446e-45	58.02	1	169	561	0	66	184
TRINITY_DN2853_c0_g3	1	561	703	59.89	15.65	sp|Q9Y804|FAN1_SCHPO Fanconi-associated nuclease 1 homolog OS=Schizosaccharomyces pombe (strain 972 / ATCC 24843) GN=SPBC146.06c PE=1 SV=1	119	50.447	2.12973e-06	31.97	-1	223	558	0	361	470
TRINITY_DN4650_c0_g3	1	542	289	73.62	46.02	sp|P78603|SEC17_COPC7 Vesicular-fusion protein SEC17 OS=Coprinopsis cinerea (strain Okayama-7 / 130 / ATCC MYA-4618 / FGSC 9003) GN=SEC17 PE=3 SV=2	474	187.193	4.85679e-57	66.92	-2	143	541	0	154	286
TRINITY_DN5172_c0_g3	1	539	597	51.21	15.41	sp|Q4WCV3|MRS2_ASPFU Mitochondrial inner membrane magnesium transporter mrs2 OS=Neosartorya fumigata (strain ATCC MYA-4609 / Af293 / CBS 101355 / FGSC A1100) GN=mrs2 PE=3 SV=1	165	68.1662	4.57835e-20	46.74	-2	149	424	0	304	395
TRINITY_DN6487_c0_g2	1	530	699	87.17	23.03	sp|P11837|NIMA_EMENI G2-specific protein kinase nimA OS=Emericella nidulans (strain FGSC A4 / ATCC 38163 / CBS 112.46 / NRRL 194 / M139) GN=nimA PE=1 SV=1	367	145.976	2.89034e-39	47.2	-3	1	462	0	11	171
TRINITY_DN7088_c0_g2	1	518	423	84.56	33.57	sp|P53759|DUS1_YEAST tRNA-dihydrouridine(16/17) synthase [NAD(P)(+)] OS=Saccharomyces cerevisiae (strain ATCC 204508 / S288c) GN=DUS1 PE=1 SV=1	434	171.785	6.93949e-50	58.11	3	81	518	0	4	145
TRINITY_DN289_c0_g1	1	507	118	31.36	44.92	sp|Q92363|YEJL_SCHPO Uncharacterized protein C31G5.21 OS=Schizosaccharomyces pombe (strain 972 / ATCC 24843) GN=N118 PE=4 SV=1	149	62.003	2.15916e-11	54.72	1	310	468	0	66	118
TRINITY_DN3381_c0_g5	1	501	904	68.26	12.72	sp|Q54UC2|COG2_DICDI Conserved oligomeric Golgi complex subunit 2 OS=Dictyostelium discoideum GN=cog2 PE=3 SV=1	134	56.225	2.52097e-08	26.09	1	160	501	0	50	164
TRINITY_DN8471_c1_g10	1	494	475	39.47	13.68	sp|O54161|EABF_STRCO Extracellular exo-alpha-L-arabinofuranosidase OS=Streptomyces coelicolor (strain ATCC BAA-471 / A3(2) / M145) GN=abfB PE=1 SV=1	126	53.1434	2.22936e-07	40.91	-2	11	205	0	91	155
TRINITY_DN2528_c0_g1	1	491	190	89.21	76.84	sp|Q09711|NCS1_SCHPO Calcium-binding protein NCS-1 OS=Schizosaccharomyces pombe (strain 972 / ATCC 24843) GN=ncs1 PE=1 SV=2	609	239.195	7.18331e-79	77.4	3	54	491	0	1	146
TRINITY_DN2398_c0_g1	1	476	291	23.32	12.37	sp|Q5U3U0|PHYD1_DANRE Phytanoyl-CoA dioxygenase domain-containing protein 1 OS=Danio rerio GN=phyhd1 PE=2 SV=1	94	40.817	3.32845e-12	48.65	-1	363	473	0	95	130
TRINITY_DN3300_c0_g2	1	473	2699	76.11	4.48	sp|Q6LA55|YF49_SCHPO UPF0648 protein C3H5.09c OS=Schizosaccharomyces pombe (strain 972 / ATCC 24843) GN=SPAC3H5.09c PE=3 SV=2	184	75.485	1.73132e-14	31.15	1	52	411	0	2265	2385
TRINITY_DN6437_c0_g5	1	467	483	66.81	21.53	sp|Q9I6M5|DAVD_PSEAE Glutarate-semialdehyde dehydrogenase DavD OS=Pseudomonas aeruginosa (strain ATCC 15692 / DSM 22644 / CIP 104116 / JCM 14847 / LMG 12228 / 1C / PRS 101 / PAO1) GN=davD PE=1 SV=1	282	113.235	1.92492e-28	51.92	2	128	439	0	3	106
TRINITY_DN6316_c0_g3	1	452	370	52.43	21.08	sp|Q55FN7|ODBB_DICDI 2-oxoisovalerate dehydrogenase subunit beta, mitochondrial OS=Dictyostelium discoideum GN=bkdB PE=3 SV=1	168	69.3218	4.33493e-13	47.62	1	208	444	0	11	88
TRINITY_DN4167_c0_g1	1	447	453	82.55	27.81	sp|Q4P4N1|ATG18_USTMA Autophagy-related protein 18 OS=Ustilago maydis (strain 521 / FGSC 9021) GN=ATG18 PE=3 SV=1	493	194.512	1.27936e-58	73.02	-2	3	371	0	14	139
TRINITY_DN4364_c0_g1	1	442	479	45.48	13.99	sp|P53318|COQ6_YEAST Ubiquinone biosynthesis monooxygenase COQ6, mitochondrial OS=Saccharomyces cerevisiae (strain ATCC 204508 / S288c) GN=COQ6 PE=1 SV=1	140	58.5362	2.54535e-09	41.79	1	1	201	0	411	477
TRINITY_DN8753_c0_g1	1	438	223	40.41	26.01	sp|Q9GP33|RAB4A_ECHMU Probable Ras-related protein Rab-4A OS=Echinococcus multilocularis PE=2 SV=1	172	70.8626	2.47537e-14	57.63	-2	3	179	0	17	74
TRINITY_DN2174_c0_g1	1	424	565	97.64	21.06	sp|Q8J0Q0|MNS1_CANAX Mannosyl-oligosaccharide 1,2-alpha-mannosidase OS=Candida albicans GN=MNS1 PE=3 SV=2	267	107.457	3.39924e-26	40.58	-3	9	422	0	123	241
TRINITY_DN5903_c0_g1	1	421	3144	95.49	4.42	sp|Q07878|VPS13_YEAST Vacuolar protein sorting-associated protein 13 OS=Saccharomyces cerevisiae (strain ATCC 204508 / S288c) GN=VPS13 PE=1 SV=1	218	88.5817	3.81642e-19	38.85	1	1	402	0	33	171
TRINITY_DN8598_c0_g5	1	418	282	80.38	38.65	sp|Q9UTQ5|YL39_SCHPO Uncharacterized J domain-containing protein C1071.09c OS=Schizosaccharomyces pombe (strain 972 / ATCC 24843) GN=SPAC1071.09c PE=3 SV=1	192	78.5666	7.78349e-17	40.52	2	80	415	0	29	137
TRINITY_DN3152_c0_g2	1	388	953	99.74	13.75	sp|Q9JIF7|COPB_MOUSE Coatomer subunit beta OS=Mus musculus GN=Copb1 PE=1 SV=1	453	179.104	2.75595e-51	60.31	1	1	387	0	729	859
TRINITY_DN10496_c0_g1	1	361	378	47.37	16.14	sp|Q42656|AGAL_COFAR Alpha-galactosidase OS=Coffea arabica PE=1 SV=1	137	57.3806	3.34975e-09	44.26	2	191	361	0	18	78
TRINITY_DN8007_c0_g2	1	351	378	59.83	17.72	sp|Q9P7E3|DCAM_SCHPO S-adenosylmethionine decarboxylase proenzyme OS=Schizosaccharomyces pombe (strain 972 / ATCC 24843) GN=spe2 PE=2 SV=1	159	65.855	3.53726e-12	46.48	2	140	349	0	17	83
TRINITY_DN4439_c0_g1	1	346	552	49.42	9.96	sp|Q6BU46|SYNC_DEBHA Asparagine--tRNA ligase, cytoplasmic OS=Debaryomyces hansenii (strain ATCC 36239 / CBS 767 / JCM 1990 / NBRC 0083 / IGC 2968) GN=DED81 PE=3 SV=1	142	59.3066	4.3937e-20	47.37	-3	30	200	0	361	415
TRINITY_DN7028_c0_g1	1	329	729	98.48	14.81	sp|Q9FME8|OPT4_ARATH Oligopeptide transporter 4 OS=Arabidopsis thaliana GN=OPT4 PE=1 SV=1	184	75.485	2.56054e-15	35.19	3	3	326	0	425	532
TRINITY_DN1432_c0_g1	1	324	106	30.56	31.13	sp|Q9UW02|THIO_COPCM Thioredoxin OS=Coprinus comatus PE=1 SV=1	110	46.9802	1.12343e-11	57.58	-1	43	141	0	74	106
TRINITY_DN6987_c0_g2	1	292	532	60.62	11.09	sp|O94122|KPYK_AGABI Pyruvate kinase OS=Agaricus bisporus GN=pkiA PE=2 SV=1	272	109.383	8.73701e-28	86.44	-3	114	290	0	473	531
TRINITY_DN10194_c0_g1	1	283	1133	45.58	3.8	sp|P36607|RAD5_SCHPO DNA repair protein rad8 OS=Schizosaccharomyces pombe (strain 972 / ATCC 24843) GN=rad8 PE=1 SV=1	145	60.4622	3.27337e-10	58.14	3	114	242	0	1055	1097
TRINITY_DN10155_c0_g1	1	280	1057	38.57	3.41	sp|Q55EJ3|NAT10_DICDI RNA cytidine acetyltransferase OS=Dictyostelium discoideum GN=nat10 PE=3 SV=1	117	49.6766	1.21911e-06	61.11	-3	81	188	0	2	37
TRINITY_DN678_c0_g1	1	273	498	97.8	16.87	sp|O94447|SLM1_SCHPO Cytoskeletal signaling protein slm1 OS=Schizosaccharomyces pombe (strain 972 / ATCC 24843) GN=slm1 PE=1 SV=1	148	61.6178	6.91002e-11	37.08	2	2	268	0	284	367
TRINITY_DN10274_c0_g1	1	265	736	93.96	10.73	sp|A2QTU5|XYLA_ASPNC Alpha-xylosidase A OS=Aspergillus niger (strain CBS 513.88 / FGSC A1513) GN=axlA PE=1 SV=1	148	61.6178	7.82596e-11	38.55	-2	1	249	0	651	729
TRINITY_DN10326_c0_g1	1	263	2062	90.11	3.83	sp|Q54YZ9|DHKJ_DICDI Hybrid signal transduction histidine kinase J OS=Dictyostelium discoideum GN=dhkJ PE=3 SV=2	237	95.9005	1.68573e-22	58.23	3	27	263	0	930	1008
TRINITY_DN9953_c0_g1	1	250	700	99.6	8.57	sp|P13677|KPC2_DROME Protein kinase C, eye isozyme OS=Drosophila melanogaster GN=inaC PE=1 SV=1	141	58.9214	6.16974e-10	38.55	-1	2	250	0	496	555
TRINITY_DN7845_c0_g4	1	246	853	51.22	4.69	sp|Q94464|DYNA_DICDI Dynamin-A OS=Dictyostelium discoideum GN=dymA PE=1 SV=2	136	56.9954	2.96261e-09	66.67	3	120	245	0	3	42
TRINITY_DN2769_c0_g1	1	241	583	95.85	12.35	sp|P0CT24|GLU2B_USTMA Glucosidase 2 subunit beta OS=Ustilago maydis (strain 521 / FGSC 9021) GN=UMAG_12045 PE=3 SV=1	143	59.6918	2.56075e-10	45.57	-3	6	236	0	112	183
TRINITY_DN431_c0_g1	1	201	444	97.01	14.41	sp|Q6GQE1|T184C_XENLA Transmembrane protein 184C OS=Xenopus laevis GN=tmem184c PE=2 SV=1	120	50.8322	1.70647e-07	40	-2	6	200	0	175	238
TRINITY_DN8638_c1_g3	1	8338	1403	10.87	20.38	sp|Q10475|IF4G_SCHPO Eukaryotic translation initiation factor 4 gamma OS=Schizosaccharomyces pombe (strain 972 / ATCC 24843) GN=tif471 PE=1 SV=1	803	313.923	3.25215e-85	50.96	-1	5663	6568	0	966	1251
TRINITY_DN8382_c0_g1	1	6899	295	14.13	91.86	sp|Q6FTN2|DIC1_CANGA Mitochondrial dicarboxylate transporter OS=Candida glabrata (strain ATCC 2001 / CBS 138 / JCM 3761 / NBRC 0622 / NRRL Y-65) GN=DIC1 PE=3 SV=1	362	144.05	2.73171e-35	34.76	-1	1707	2681	0	14	284
TRINITY_DN8502_c1_g3	1	6180	2084	27.72	24.42	sp|Q9HEC9|SEC16_NEUCR COPII coat assembly protein sec16 OS=Neurospora crassa (strain ATCC 24698 / 74-OR23-1A / CBS 708.71 / DSM 1257 / FGSC 987) GN=sec16 PE=3 SV=1	560	220.32	5.90765e-56	28.92	-3	2393	4105	0	1047	1555
TRINITY_DN8971_c0_g1	1	5701	924	33.99	68.61	sp|D4AUF1|WSCD1_ARTBC WSC domain-containing protein ARB_07867 OS=Arthroderma benhamiae (strain ATCC MYA-4681 / CBS 112371) GN=ARB_07867 PE=1 SV=1	1826	707.983	0	54.91	-1	962	2899	0	164	797
TRINITY_DN7986_c1_g1	1	5517	872	7.94	15.71	sp|P40995|SCD1_SCHPO Rho guanine nucleotide exchange factor scd1 OS=Schizosaccharomyces pombe (strain 972 / ATCC 24843) GN=scd1 PE=1 SV=2	156	64.6994	9.07351e-09	30.92	2	2672	3109	0	410	546
TRINITY_DN9319_c0_g2	1	5269	544	30.01	96.51	sp|A7HU16|BVMO_PARL1 Baeyer-Villiger monooxygenase OS=Parvibaculum lavamentivorans (strain DS-1 / DSM 13023 / NCIMB 13966) GN=Plav_1781 PE=1 SV=1	1380	536.184	5.4976e-171	49.53	-3	2325	3905	0	19	543
TRINITY_DN5460_c0_g1	1	5097	130	5.06	66.15	sp|P46792|RS22_AGABI 40S ribosomal protein S22 OS=Agaricus bisporus GN=rps22 PE=2 SV=1	387	153.68	9.16398e-41	82.56	1	577	834	0	45	130
TRINITY_DN8880_c0_g2	1	4893	424	25.32	93.63	sp|O74369|CSS1_SCHPO Inositol phosphosphingolipids phospholipase C OS=Schizosaccharomyces pombe (strain 972 / ATCC 24843) GN=css1 PE=1 SV=2	597	234.572	2.94463e-65	35.7	1	19	1257	0	8	404
TRINITY_DN7850_c1_g1	1	4533	254	13.37	52.36	sp|A8N1Z1|TVP23_COPC7 Golgi apparatus membrane protein TVP23 OS=Coprinopsis cinerea (strain Okayama-7 / 130 / ATCC MYA-4618 / FGSC 9003) GN=TVP23 PE=3 SV=2	364	144.821	1.19626e-51	46.08	-3	3386	3991	0	122	254
TRINITY_DN8773_c0_g1	1	4429	388	23.91	79.12	sp|Q28389|PAG_HORSE Pregnancy-associated glycoprotein OS=Equus caballus GN=PAG PE=2 SV=1	225	91.2781	7.93881e-18	27.73	3	546	1604	0	73	379
TRINITY_DN8838_c0_g1	1	4233	314	8.58	40.13	sp|O70593|SGTA_RAT Small glutamine-rich tetratricopeptide repeat-containing protein alpha OS=Rattus norvegicus GN=Sgta PE=1 SV=1	211	85.8853	1.79473e-16	38.89	3	2499	2861	0	84	209
TRINITY_DN8147_c0_g1	1	4159	889	18.9	31.83	sp|P28584|TRK2_YEAST Low-affinity potassium transport protein OS=Saccharomyces cerevisiae (strain ATCC 204508 / S288c) GN=TRK2 PE=1 SV=1	595	233.802	6.77958e-62	44.52	-3	1884	2669	0	559	841
TRINITY_DN7777_c0_g1	1	4005	109	6.07	78.9	sp|P04158|SC1_SCHCO Fruiting body protein SC1 OS=Schizophyllum commune GN=SC1 PE=2 SV=2	147	61.2326	2.97058e-09	47.67	-3	428	670	0	24	109
TRINITY_DN4829_c0_g1	1	3861	657	23.08	42.62	sp|P41412|RES2_SCHPO Cell division cycle-related protein res2/pct1 OS=Schizosaccharomyces pombe (strain 972 / ATCC 24843) GN=res2 PE=1 SV=1	408	161.77	1.24517e-39	33.44	-2	2055	2945	0	241	520
TRINITY_DN9096_c0_g1	1	3786	542	23.69	49.45	sp|O60113|YG64_SCHPO Uncharacterized amino-acid permease C15C4.04c OS=Schizosaccharomyces pombe (strain 972 / ATCC 24843) GN=SPBC15C4.04c PE=3 SV=1	391	155.221	9.50465e-62	37.95	-1	1750	2646	0	274	541
TRINITY_DN9091_c0_g1	1	3713	678	31.75	49.56	sp|P70403|CASP_MOUSE Protein CASP OS=Mus musculus GN=Cux1 PE=1 SV=2	402	159.458	6.45193e-39	30.45	2	68	1246	0	307	642
TRINITY_DN9136_c1_g1	1	3637	500	13.03	31.6	sp|Q9UTQ0|CCA1_SCHPO Putative CCA tRNA nucleotidyltransferase 1 OS=Schizosaccharomyces pombe (strain 972 / ATCC 24843) GN=SPAC1093.04c PE=3 SV=2	368	146.362	1.146e-65	49.06	2	128	601	0	10	167
TRINITY_DN5081_c0_g1	1	3570	759	10	15.02	sp|P17065|SEC2_YEAST Rab guanine nucleotide exchange factor SEC2 OS=Saccharomyces cerevisiae (strain ATCC 204508 / S288c) GN=SEC2 PE=1 SV=1	135	56.6102	1.35951e-06	36.13	-3	2963	3319	0	10	123
TRINITY_DN7454_c0_g1	1	3513	554	40.56	79.24	sp|Q6ETN3|4CL3_ORYSJ Probable 4-coumarate--CoA ligase 3 OS=Oryza sativa subsp. japonica GN=4CL3 PE=2 SV=1	543	213.772	2.98842e-62	34.44	-3	584	2008	0	11	449
TRINITY_DN7949_c0_g1	1	3468	801	50.26	71.79	sp|P50520|VPS34_SCHPO Phosphatidylinositol 3-kinase vps34 OS=Schizosaccharomyces pombe (strain 972 / ATCC 24843) GN=vps34 PE=2 SV=2	1452	563.918	0	54.42	-2	915	2657	0	227	801
TRINITY_DN7440_c0_g2	1	3405	206	11.63	63.59	sp|Q9BY08|EBPL_HUMAN Emopamil-binding protein-like OS=Homo sapiens GN=EBPL PE=1 SV=1	351	139.813	2.21933e-35	51.52	-2	255	650	0	40	170
TRINITY_DN7508_c0_g1	1	3297	559	23.2	44.19	sp|Q4WAW5|FTMC_ASPFU Tryprostatin B 6-hydroxylase OS=Neosartorya fumigata (strain ATCC MYA-4609 / Af293 / CBS 101355 / FGSC A1100) GN=ftmP450-1 PE=3 SV=2	283	113.62	1.25708e-24	30.53	3	2466	3230	0	313	559
TRINITY_DN8923_c0_g3	1	3259	1356	7.09	6.56	sp|Q00808|HETE1_PODAS Vegetative incompatibility protein HET-E-1 OS=Podospora anserina GN=HET-E1 PE=4 SV=1	188	77.0258	8.23161e-13	42.7	-1	992	1222	0	73	161
TRINITY_DN4367_c0_g1	1	3212	419	19.71	37.71	sp|Q7ZTL7|BCS1_XENLA Mitochondrial chaperone BCS1 OS=Xenopus laevis GN=bcs1l PE=2 SV=1	349	139.043	1.76418e-43	39.81	1	859	1491	0	213	370
TRINITY_DN7697_c0_g2	1	3132	700	26.92	44.57	sp|Q9EPL9|ACOX3_MOUSE Peroxisomal acyl-coenzyme A oxidase 3 OS=Mus musculus GN=Acox3 PE=1 SV=2	168	69.3218	1.23038e-10	23.03	-1	880	1722	0	142	453
TRINITY_DN10465_c0_g1	1	3097	1035	36.23	36.04	sp|P39692|MET10_YEAST Sulfite reductase [NADPH] flavoprotein component OS=Saccharomyces cerevisiae (strain ATCC 204508 / S288c) GN=MET10 PE=1 SV=2	918	358.221	8.29488e-105	47.06	-1	59	1180	0	634	1006
TRINITY_DN9262_c0_g1	1	2948	681	32.36	45.52	sp|Q92359|YDHE_SCHPO Pumilio domain-containing protein C6G9.14 OS=Schizosaccharomyces pombe (strain 972 / ATCC 24843) GN=SPAC6G9.14 PE=4 SV=1	905	353.214	1.56807e-106	53.77	-3	1291	2244	0	348	657
TRINITY_DN3350_c0_g1	1	2885	1088	64.78	54.41	sp|O49552|DDB1B_ARATH DNA damage-binding protein 1b OS=Arabidopsis thaliana GN=DDB1B PE=2 SV=2	561	220.705	2.59899e-69	28.64	-3	70	1938	0	497	1088
TRINITY_DN7880_c0_g1	1	2854	225	19.24	79.56	sp|Q9P6P8|YIP4_SCHPO Protein YIP4 OS=Schizosaccharomyces pombe (strain 972 / ATCC 24843) GN=SPAC644.13c PE=1 SV=1	406	160.999	1.00779e-42	44.26	-1	2033	2581	0	43	221
TRINITY_DN6941_c0_g1	1	2794	580	47.78	73.62	sp|O13902|DAK1_SCHPO Dihydroxyacetone kinase 1 OS=Schizosaccharomyces pombe (strain 972 / ATCC 24843) GN=dak1 PE=3 SV=1	523	206.068	5.64085e-76	37.47	-2	1252	2586	0	3	429
TRINITY_DN8247_c0_g3	1	2763	1304	80.67	57.67	sp|Q99NB9|SF3B1_MOUSE Splicing factor 3B subunit 1 OS=Mus musculus GN=Sf3b1 PE=1 SV=1	2507	970.304	0	65.58	-1	1	2229	0	286	1037
TRINITY_DN1095_c0_g1	1	2728	222	13.97	60.36	sp|Q9SHD3|CCU21_ARATH Cyclin-U2-1 OS=Arabidopsis thaliana GN=CYCU2-1 PE=1 SV=1	157	65.0846	3.21452e-10	28.36	-3	1644	2024	0	70	203
TRINITY_DN8161_c0_g1	1	2690	336	16.28	41.07	sp|P0CU27|EFM3_CHATD Protein-lysine N-methyltransferase EFM3 OS=Chaetomium thermophilum (strain DSM 1495 / CBS 144.50 / IMI 039719) GN=CTHT_0041970.1 PE=3 SV=1	171	70.4774	1.87521e-16	35.62	2	683	1120	0	157	294
TRINITY_DN8150_c0_g1	1	2668	988	18.67	17.11	sp|P0CP71|ATG1_CRYNB Serine/threonine-protein kinase ATG1 OS=Cryptococcus neoformans var. neoformans serotype D (strain B-3501A) GN=ATG1 PE=3 SV=1	610	239.58	1.12277e-100	66.27	-1	1475	1972	0	167	335
TRINITY_DN7827_c0_g3	1	2646	307	14.17	36.16	sp|Q8YSU5|Y2987_NOSS1 UPF0187 protein alr2987 OS=Nostoc sp. (strain PCC 7120 / SAG 25.82 / UTEX 2576) GN=alr2987 PE=3 SV=1	150	62.3882	4.63267e-09	31.82	-1	583	957	0	180	290
TRINITY_DN8897_c1_g3	1	2624	523	39.33	63.86	sp|P16496|CP52C_CANMA Cytochrome P450 52A3-A OS=Candida maltosa GN=CYP52A3-A PE=1 SV=3	394	156.377	1.01855e-52	33.24	-1	393	1424	0	48	381
TRINITY_DN2050_c0_g1	1	2597	1536	9.13	5.14	sp|P22579|SIN3_YEAST Transcriptional regulatory protein SIN3 OS=Saccharomyces cerevisiae (strain ATCC 204508 / S288c) GN=SIN3 PE=1 SV=2	321	128.257	1.07593e-28	72.15	1	904	1140	0	217	295
TRINITY_DN3330_c0_g1	1	2575	719	65.13	64.12	sp|P38093|FLBA_EMENI Developmental regulator flbA OS=Emericella nidulans (strain FGSC A4 / ATCC 38163 / CBS 112.46 / NRRL 194 / M139) GN=flbA PE=2 SV=1	697	273.092	8.86835e-78	33.63	-3	705	2381	0	215	675
TRINITY_DN5703_c0_g1	1	2549	355	31.07	74.08	sp|O59790|ARK1_SCHPO Serine/threonine-protein kinase ark1 OS=Schizosaccharomyces pombe (strain 972 / ATCC 24843) GN=ark1 PE=1 SV=2	1031	401.749	1.67813e-130	68.56	3	411	1202	0	82	344
TRINITY_DN6282_c0_g2	1	2528	576	15.19	22.22	sp|D8Q9M3|AMYG_SCHCM Glucoamylase ARB_02327-1 OS=Schizophyllum commune (strain H4-8 / FGSC 9210) GN=SCHCODRAFT_57589 PE=1 SV=1	421	166.777	3.89824e-42	63.57	3	2145	2528	0	15	142
TRINITY_DN7286_c0_g1	1	2507	732	80.06	83.61	sp|Q9ZVH4|CUL3A_ARATH Cullin-3A OS=Arabidopsis thaliana GN=CUL3A PE=1 SV=1	1252	486.878	2.71512e-158	39.23	-1	93	2099	0	121	732
TRINITY_DN1320_c0_g1	1	2480	590	24.92	38.81	sp|Q6BJY4|SMI2_DEBHA KNR4/SMI1 homolog 2 OS=Debaryomyces hansenii (strain ATCC 36239 / CBS 767 / JCM 1990 / NBRC 0083 / IGC 2968) GN=DEHA2F26422g PE=3 SV=2	339	135.191	8.66058e-32	34.45	2	371	988	0	108	336
TRINITY_DN7266_c0_g1	1	2442	424	42.14	79.95	sp|Q8RX88|FACE1_ARATH CAAX prenyl protease 1 homolog OS=Arabidopsis thaliana GN=FACE1 PE=1 SV=1	611	239.965	5.49904e-76	40.99	3	123	1151	0	2	340
TRINITY_DN9141_c0_g2	1	2423	710	40.61	40	sp|O70196|PPCE_RAT Prolyl endopeptidase OS=Rattus norvegicus GN=Prep PE=1 SV=1	425	168.318	2.20657e-80	35.01	-3	790	1773	0	8	291
TRINITY_DN9272_c0_g2	1	2363	101	17.01	98.02	sp|Q12306|SMT3_YEAST Ubiquitin-like protein SMT3 OS=Saccharomyces cerevisiae (strain ATCC 204508 / S288c) GN=SMT3 PE=1 SV=1	186	76.2554	9.83983e-15	37.04	-3	1909	2310	0	1	99
TRINITY_DN8846_c1_g1	1	2337	340	20.92	48.53	sp|O17606|YK4P_CAEEL UPF0160 protein C27H6.8 OS=Caenorhabditis elegans GN=C27H6.8 PE=3 SV=2	448	177.178	6.64514e-80	49.7	1	895	1383	0	1	165
TRINITY_DN7247_c0_g1	1	2295	899	81.57	69.3	sp|Q9C270|PWP2_NEUCR Periodic tryptophan protein 2 homolog OS=Neurospora crassa (strain ATCC 24698 / 74-OR23-1A / CBS 708.71 / DSM 1257 / FGSC 987) GN=B18D24.40 PE=3 SV=1	1842	714.146	0	55.96	2	332	2203	0	210	832
TRINITY_DN7927_c1_g1	1	2276	611	8.7	10.8	sp|P25351|YCR3_YEAST Uncharacterized membrane protein YCR023C OS=Saccharomyces cerevisiae (strain ATCC 204508 / S288c) GN=YCR023C PE=1 SV=2	128	53.9138	5.07903e-15	33.33	-3	1615	1812	0	66	131
TRINITY_DN8953_c1_g2	1	2241	231	12.32	39.83	sp|P17871|TBP_SCHPO TATA-box-binding protein OS=Schizosaccharomyces pombe (strain 972 / ATCC 24843) GN=tbp1 PE=3 SV=1	442	174.866	1.50252e-74	88.04	-2	561	836	0	89	180
TRINITY_DN6796_c0_g1	1	2215	429	40.23	84.38	sp|P0CS10|TRM10_CRYNJ tRNA (guanine(9)-N1)-methyltransferase OS=Cryptococcus neoformans var. neoformans serotype D (strain JEC21 / ATCC MYA-565) GN=TRM10 PE=3 SV=1	410	162.54	5.16181e-42	33.42	3	771	1661	0	16	377
TRINITY_DN7411_c0_g1	1	2199	283	31.65	93.64	sp|Q4P4X6|EIF3K_USTMA Eukaryotic translation initiation factor 3 subunit K OS=Ustilago maydis (strain 521 / FGSC 9021) GN=UMAG_12282 PE=3 SV=2	489	192.971	4.50896e-54	41.79	3	96	791	0	5	269
TRINITY_DN8660_c1_g3	1	2146	500	18.87	19.8	sp|P10634|CP2DQ_RAT Cytochrome P450 2D26 OS=Rattus norvegicus GN=Cyp2d26 PE=1 SV=2	144	60.077	4.43165e-08	28.15	-1	617	1021	0	305	403
TRINITY_DN3426_c0_g2	1	2131	3744	99.67	20.19	sp|P38811|TRA1_YEAST Transcription-associated protein 1 OS=Saccharomyces cerevisiae (strain ATCC 204508 / S288c) GN=TRA1 PE=1 SV=1	589	231.491	9.82748e-62	25.66	3	3	2126	0	1440	2195
TRINITY_DN7943_c0_g1	1	2113	1011	5.25	3.66	sp|Q4WG05|BGALE_ASPFU Probable beta-galactosidase E OS=Neosartorya fumigata (strain ATCC MYA-4609 / Af293 / CBS 101355 / FGSC A1100) GN=lacE PE=3 SV=1	149	62.003	1.78752e-08	67.57	-1	2	112	0	42	78
TRINITY_DN6055_c0_g2	1	2096	720	93.18	87.22	sp|P41389|MCM5_SCHPO DNA replication licensing factor mcm5 OS=Schizosaccharomyces pombe (strain 972 / ATCC 24843) GN=mcm5 PE=1 SV=2	2061	798.505	0	61.44	-2	143	2095	0	93	720
TRINITY_DN2991_c0_g1	1	2077	683	29.03	28.7	sp|P50528|PLO1_SCHPO Serine/threonine-protein kinase plo1 OS=Schizosaccharomyces pombe (strain 972 / ATCC 24843) GN=plo1 PE=1 SV=1	296	118.627	2.67087e-26	32.2	2	1016	1618	0	470	665
TRINITY_DN5494_c0_g4	1	2062	1082	16.59	13.4	sp|O13817|SEC7C_SCHPO Protein transport protein sec73 OS=Schizosaccharomyces pombe (strain 972 / ATCC 24843) GN=sec73 PE=3 SV=2	126	53.1434	8.94904e-06	28.77	1	364	705	0	642	786
TRINITY_DN4972_c0_g1	1	2044	420	37.57	58.1	sp|O74327|AVT5_SCHPO Vacuolar amino acid transporter 5 OS=Schizosaccharomyces pombe (strain 972 / ATCC 24843) GN=avt5 PE=3 SV=1	305	122.094	9.3883e-58	38.43	-1	323	1090	0	175	418
TRINITY_DN2852_c0_g1	1	2014	797	36.49	30.36	sp|O74740|CFT2_SCHPO Cleavage factor two protein 2 OS=Schizosaccharomyces pombe (strain 972 / ATCC 24843) GN=cft2 PE=1 SV=1	340	135.576	1.09867e-31	30.35	-2	43	777	0	556	797
TRINITY_DN5566_c0_g1	1	1998	582	62.61	74.57	sp|Q8BXQ2|PIGT_MOUSE GPI transamidase component PIG-T OS=Mus musculus GN=Pigt PE=1 SV=2	548	215.698	1.82893e-68	32.97	2	482	1732	0	122	555
TRINITY_DN2830_c0_g3	1	1909	615	53.27	51.22	sp|Q9FYG4|GLOX1_ARATH Aldehyde oxidase GLOX1 OS=Arabidopsis thaliana GN=GLOX1 PE=2 SV=1	419	166.007	1.64833e-42	34.47	-3	831	1847	0	298	612
TRINITY_DN5636_c0_g1	1	1891	431	13.8	19.49	sp|Q874C0|PEX3_YARLI Peroxisomal biogenesis factor 3 OS=Yarrowia lipolytica (strain CLIB 122 / E 150) GN=PEX3 PE=3 SV=1	137	57.3806	2.32064e-07	32.18	3	1161	1421	0	213	296
TRINITY_DN3508_c0_g2	1	1879	751	98.51	81.76	sp|A8NWR2|ERB1_COPC7 Ribosome biogenesis protein ERB1 OS=Coprinopsis cinerea (strain Okayama-7 / 130 / ATCC MYA-4618 / FGSC 9003) GN=ERB1 PE=3 SV=2	1760	682.559	0	62.99	3	3	1853	0	138	751
TRINITY_DN1581_c0_g1	1	1839	594	79.45	81.99	sp|Q92253|RCO3_NEUCR Probable glucose transporter rco-3 OS=Neurospora crassa (strain ATCC 24698 / 74-OR23-1A / CBS 708.71 / DSM 1257 / FGSC 987) GN=rco-3 PE=3 SV=2	1084	422.165	4.72397e-138	46.87	-2	318	1778	0	16	502
TRINITY_DN6027_c0_g1	1	1823	508	74.05	90.55	sp|P0DPA7|PSIH_PSICU Cytochrome P450 monooxygenase psiH OS=Psilocybe cubensis GN=psiH PE=1 SV=1	858	335.109	1.69124e-105	38.96	-1	138	1487	0	41	500
TRINITY_DN8036_c0_g1	1	1812	412	58.77	84.47	sp|P0CP32|HUT1_CRYNJ UDP-galactose transporter homolog 1 OS=Cryptococcus neoformans var. neoformans serotype D (strain JEC21 / ATCC MYA-565) GN=HUT1-A PE=3 SV=1	556	218.779	2.69055e-71	39.16	-1	592	1656	0	5	352
TRINITY_DN7033_c0_g1	1	1776	870	20.1	11.03	sp|P50570|DYN2_HUMAN Dynamin-2 OS=Homo sapiens GN=DNM2 PE=1 SV=2	116	49.2914	1.91475e-09	32	-1	1057	1413	0	45	140
TRINITY_DN5945_c0_g1	1	1707	1180	7.21	3.22	sp|Q9BXT4|TDRD1_HUMAN Tudor domain-containing protein 1 OS=Homo sapiens GN=TDRD1 PE=1 SV=2	132	55.4546	1.45397e-06	51.22	-3	56	178	0	170	207
TRINITY_DN7066_c0_g2	1	1684	447	26.01	32.89	sp|P0CT90|OMT2_PHACR 3-O-methyltransferase 2 OS=Phanerochaete chrysosporium (strain RP-78 / ATCC MYA-4764 / FGSC 9002) GN=e_gw1.4.1014.1 PE=1 SV=1	225	91.2781	1.36574e-23	33.56	-3	378	815	0	1	147
TRINITY_DN10006_c0_g1	1	1662	503	72.74	80.12	sp|A1CJ18|DHH1_ASPCL ATP-dependent RNA helicase dhh1 OS=Aspergillus clavatus (strain ATCC 1007 / CBS 513.65 / DSM 816 / NCTC 3887 / NRRL 1) GN=dhh1 PE=3 SV=1	1785	692.189	0	82.88	-2	237	1445	0	18	420
TRINITY_DN8598_c0_g4	1	1637	307	32.8	57.33	sp|B4JYN1|PTC71_DROGR Protein phosphatase PTC7 homolog fig OS=Drosophila grimshawi GN=fig PE=3 SV=1	312	124.79	1.99977e-30	41.99	2	881	1417	0	125	300
TRINITY_DN8989_c1_g2	1	1627	1683	39.64	12.54	sp|Q149N8|SHPRH_HUMAN E3 ubiquitin-protein ligase SHPRH OS=Homo sapiens GN=SHPRH PE=1 SV=2	210	85.5001	5.66314e-16	27.35	1	850	1494	0	1432	1642
TRINITY_DN5832_c0_g1	1	1617	578	53.06	42.73	sp|O14158|YE76_SCHPO AB hydrolase superfamily protein C4A8.06c OS=Schizosaccharomyces pombe (strain 972 / ATCC 24843) GN=SPAC4A8.06c PE=3 SV=1	408	161.77	1.39682e-41	34.62	-1	661	1518	0	170	416
TRINITY_DN7721_c0_g1	1	1587	515	36.86	33.01	sp|Q61466|SMRD1_MOUSE SWI/SNF-related matrix-associated actin-dependent regulator of chromatin subfamily D member 1 OS=Mus musculus GN=Smarcd1 PE=1 SV=3	278	111.694	3.02585e-45	36.04	3	453	1037	0	177	346
TRINITY_DN8718_c0_g1	1	1567	387	27.38	36.69	sp|O13918|ZHF1_SCHPO Zinc homeostasis factor 1 OS=Schizosaccharomyces pombe (strain 972 / ATCC 24843) GN=zhf1 PE=2 SV=3	439	173.711	5.08633e-47	60.14	-3	1077	1505	0	4	145
TRINITY_DN4485_c0_g1	1	1558	340	27.34	41.47	sp|Q09923|YAKC_SCHPO Aldo-keto reductase yakc [NADP(+)] OS=Schizosaccharomyces pombe (strain 972 / ATCC 24843) GN=yakc PE=1 SV=1	449	177.563	5.30587e-49	56.34	1	697	1122	0	148	288
TRINITY_DN4768_c0_g1	1	1550	953	75.68	39.45	sp|P23514|COPB_RAT Coatomer subunit beta OS=Rattus norvegicus GN=Copb1 PE=1 SV=1	1040	405.216	8.35956e-129	51.52	-2	5	1177	0	56	431
TRINITY_DN7697_c0_g1	1	1541	487	19.66	20.33	sp|Q5ATG7|APDF_EMENI Aspyridones efflux protein apdF OS=Emericella nidulans (strain FGSC A4 / ATCC 38163 / CBS 112.46 / NRRL 194 / M139) GN=apdF PE=2 SV=1	231	93.5893	4.11817e-37	48.51	-1	585	887	0	21	119
TRINITY_DN7209_c0_g2	1	1513	551	63.85	58.26	sp|P49374|HGT1_KLULA High-affinity glucose transporter OS=Kluyveromyces lactis (strain ATCC 8585 / CBS 2359 / DSM 70799 / NBRC 1267 / NRRL Y-1140 / WM37) GN=HGT1 PE=3 SV=1	401	159.073	6.66376e-41	30.96	-1	521	1486	0	49	369
TRINITY_DN8080_c1_g2	1	1502	328	32.56	43.6	sp|Q9P869|AAKG_KLULA 5&apos;-AMP-activated protein kinase subunit gamma OS=Kluyveromyces lactis (strain ATCC 8585 / CBS 2359 / DSM 70799 / NBRC 1267 / NRRL Y-1140 / WM37) GN=SNF4 PE=3 SV=2	254	102.449	1.45107e-57	36.59	3	882	1370	0	184	326
TRINITY_DN6437_c0_g1	1	1493	187	33.56	93.05	sp|P48737|PEBP1_MACFA Phosphatidylethanolamine-binding protein 1 OS=Macaca fascicularis GN=PEBP1 PE=2 SV=2	140	58.5362	1.39564e-08	25.99	-1	3	503	0	1	174
TRINITY_DN5217_c0_g1	1	1480	426	55.54	55.4	sp|Q09906|TM184_SCHPO Transmembrane protein 184 homolog C30D11.06c OS=Schizosaccharomyces pombe (strain 972 / ATCC 24843) GN=SPAC30D11.06c PE=1 SV=1	380	150.984	8.97569e-39	34.55	1	217	1038	0	186	421
TRINITY_DN7117_c0_g1	1	1463	624	36.09	35.9	sp|Q08912|YO389_YEAST Uncharacterized protein YOR389W OS=Saccharomyces cerevisiae (strain ATCC 204508 / S288c) GN=YOR389W PE=1 SV=1	205	83.5741	9.2818e-16	29.52	-1	861	1388	0	72	295
TRINITY_DN5060_c0_g1	1	1450	752	85.03	52.53	sp|O94335|STT3_SCHPO Dolichyl-diphosphooligosaccharide--protein glycosyltransferase subunit stt3 OS=Schizosaccharomyces pombe (strain 972 / ATCC 24843) GN=stt3 PE=3 SV=1	1249	485.723	1.6619e-162	59.81	-2	217	1449	0	348	742
TRINITY_DN7845_c0_g2	1	1410	377	28.3	29.97	sp|Q9RC92|UGL_BACGL Unsaturated glucuronyl hydrolase OS=Bacillus sp. (strain GL1) GN=ugl PE=1 SV=1	180	73.9442	1.85017e-13	32.33	-2	546	944	0	183	295
TRINITY_DN8973_c0_g1	1	1400	344	41.57	64.53	sp|P40013|BIM1_YEAST Protein BIM1 OS=Saccharomyces cerevisiae (strain ATCC 204508 / S288c) GN=BIM1 PE=1 SV=1	459	181.415	1.256e-50	43.3	1	391	972	0	8	229
TRINITY_DN9569_c0_g1	1	1377	665	68.19	43.16	sp|P15245|PHHY_TRICU Phenol hydroxylase OS=Trichosporon cutaneum PE=1 SV=3	184	75.485	3.78769e-13	24.32	-1	439	1377	0	360	646
TRINITY_DN8189_c2_g1	1	1369	442	51.94	55.88	sp|D4AUX6|A8043_ARTBC Uncharacterized secreted protein ARB_08043 OS=Arthroderma benhamiae (strain ATCC MYA-4681 / CBS 112371) GN=ARB_08043 PE=1 SV=1	413	163.696	1.82677e-43	41.53	-2	508	1218	0	155	401
TRINITY_DN7017_c0_g1	1	1359	375	20.75	25.07	sp|O80642|PGT1_ARATH Geranylgeranyl transferase type-1 subunit beta OS=Arabidopsis thaliana GN=GGB PE=1 SV=1	172	70.8626	7.19999e-20	36.17	-3	365	646	0	124	217
TRINITY_DN8920_c0_g5	1	1349	336	70.5	95.24	sp|Q9P782|YNY8_SCHPO Uncharacterized protein C1711.08 OS=Schizosaccharomyces pombe (strain 972 / ATCC 24843) GN=SPBC1711.08 PE=2 SV=1	411	162.925	4.26733e-44	30.4	-1	348	1298	0	10	329
TRINITY_DN5317_c0_g1	1	1341	2278	63.76	12.29	sp|P34756|FAB1_YEAST 1-phosphatidylinositol 3-phosphate 5-kinase FAB1 OS=Saccharomyces cerevisiae (strain ATCC 204508 / S288c) GN=FAB1 PE=1 SV=3	801	313.153	2.21127e-92	53.85	-2	267	1121	0	1997	2276
TRINITY_DN7351_c0_g2	1	1325	285	58.19	81.75	sp|Q6DJC8|TM53B_XENLA Transmembrane protein 53-B OS=Xenopus laevis GN=tmem53-b PE=2 SV=1	138	57.7658	4.83641e-08	25.27	1	241	1011	0	25	257
TRINITY_DN7366_c0_g2	1	1311	244	13.5	24.18	sp|Q3SZV6|TIM21_BOVIN Mitochondrial import inner membrane translocase subunit Tim21 OS=Bos taurus GN=TIMM21 PE=2 SV=1	98	42.3578	2.05469e-06	35.59	-3	821	997	0	97	155
TRINITY_DN3588_c0_g1	1	1305	276	49.66	81.52	sp|B8NM79|USTS_ASPFN Glutathione S-transferase-like protein ustS OS=Aspergillus flavus (strain ATCC 200026 / FGSC A1120 / NRRL 3357 / JCM 12722 / SRRC 167) GN=ustS PE=1 SV=2	207	84.3445	6.03625e-17	29.24	-2	198	845	0	33	257
TRINITY_DN6955_c0_g1	1	1295	296	67.64	76.01	sp|Q9KPQ9|PANE_VIBCH 2-dehydropantoate 2-reductase OS=Vibrio cholerae serotype O1 (strain ATCC 39315 / El Tor Inaba N16961) GN=panE PE=3 SV=1	275	110.538	5.43545e-26	29.83	-3	13	888	0	63	287
TRINITY_DN3719_c0_g1	1	1279	352	76	88.07	sp|P08524|FPPS_YEAST Farnesyl pyrophosphate synthase OS=Saccharomyces cerevisiae (strain ATCC 204508 / S288c) GN=ERG20 PE=1 SV=2	994	387.497	1.69164e-130	60.24	-1	23	994	0	43	352
TRINITY_DN8826_c1_g9	1	1262	2337	89.86	14.89	sp|Q9Y7K2|TOR2_SCHPO Serine/threonine-protein kinase tor2 OS=Schizosaccharomyces pombe (strain 972 / ATCC 24843) GN=tor2 PE=1 SV=2	1234	479.945	2.15264e-151	63.25	-3	127	1260	0	1990	2337
TRINITY_DN4028_c0_g1	1	1254	109	20.57	79.82	sp|P04158|SC1_SCHCO Fruiting body protein SC1 OS=Schizophyllum commune GN=SC1 PE=2 SV=2	176	72.4034	5.3941e-14	41.57	3	681	938	0	23	109
TRINITY_DN4191_c0_g1	1	1247	576	34.4	25.35	sp|Q5SP67|WDR26_DANRE WD repeat-containing protein 26 OS=Danio rerio GN=wdr26 PE=1 SV=1	289	115.931	1.0617e-26	42.47	-1	6	434	0	53	198
TRINITY_DN6993_c0_g1	1	1233	383	38.69	40.21	sp|Q8BIZ6|SNIP1_MOUSE Smad nuclear-interacting protein 1 OS=Mus musculus GN=Snip1 PE=1 SV=1	434	171.785	3.61962e-47	53.46	3	366	842	0	208	361
TRINITY_DN6611_c0_g1	1	1218	281	24.88	32.03	sp|Q0CBM7|FAEA_ASPTN Probable feruloyl esterase A OS=Aspergillus terreus (strain NIH 2624 / FGSC A1156) GN=faeA PE=3 SV=1	136	56.9954	9.23445e-08	33.66	-3	173	475	0	132	221
TRINITY_DN3354_c0_g1	1	1197	239	23.81	35.98	sp|D5VGV1|RUTB_CAUST Peroxyureidoacrylate/ureidoacrylate amidohydrolase RutB OS=Caulobacter segnis (strain ATCC 21756 / DSM 7131 / JCM 7823 / NBRC 15250 / LMG 17158 / TK0059) GN=rutB PE=3 SV=1	124	52.373	1.77394e-06	35.79	3	909	1193	0	119	204
TRINITY_DN7774_c0_g1	1	1190	334	75.63	88.62	sp|O14075|YEAA_SCHPO Putative 2-hydroxyacid dehydrogenase UNK4.10 OS=Schizosaccharomyces pombe (strain 972 / ATCC 24843) GN=SPAC2E11.10 PE=2 SV=1	497	196.052	5.76038e-57	42	-2	80	979	0	35	330
TRINITY_DN6145_c0_g2	1	1176	958	46.68	18.68	sp|Q5ZIC8|IPO13_CHICK Importin-13 OS=Gallus gallus GN=IPO13 PE=2 SV=1	192	78.5666	2.60788e-14	27.57	-1	337	885	0	776	954
TRINITY_DN7562_c1_g1	1	1169	642	91.1	52.96	sp|B0DZL3|AMPP1_LACBS Probable Xaa-Pro aminopeptidase P OS=Laccaria bicolor (strain S238N-H82 / ATCC MYA-4686) GN=AMPP PE=3 SV=1	1126	438.343	6.90411e-147	64.17	-2	101	1165	0	153	492
TRINITY_DN6329_c0_g1	1	1148	335	85.98	97.61	sp|P07703|RPAC1_YEAST DNA-directed RNA polymerases I and III subunit RPAC1 OS=Saccharomyces cerevisiae (strain ATCC 204508 / S288c) GN=RPC40 PE=1 SV=1	830	324.324	1.05969e-106	49.1	-1	132	1118	0	5	331
TRINITY_DN9583_c0_g1	1	1143	3432	25.2	2.74	sp|Q54Q69|DHKG_DICDI Hybrid signal transduction histidine kinase G OS=Dictyostelium discoideum GN=dhkG PE=3 SV=1	223	90.5077	3.45032e-18	48.45	-3	95	382	0	696	789
TRINITY_DN9117_c1_g4	1	1137	580	25.33	16.38	sp|G3Y424|YANF_ASPNA FAD-dependent monooxygenase yanF OS=Aspergillus niger (strain ATCC 1015 / CBS 113.46 / FGSC A1144 / LSHB Ac4 / NCTC 3858a / NRRL 328 / USDA 3528.7) GN=yanF PE=1 SV=1	179	73.559	8.4224e-13	40.62	1	448	735	0	151	245
TRINITY_DN1835_c0_g1	1	1129	349	88.75	96.28	sp|P24391|TOM40_NEUCR Mitochondrial import receptor subunit tom40 OS=Neurospora crassa (strain ATCC 24698 / 74-OR23-1A / CBS 708.71 / DSM 1257 / FGSC 987) GN=tom40 PE=1 SV=1	662	259.61	1.97712e-81	40.17	2	62	1063	0	2	337
TRINITY_DN5526_c0_g1	1	1114	493	72.98	49.7	sp|P0CR62|SNX4_CRYNJ Sorting nexin-4 OS=Cryptococcus neoformans var. neoformans serotype D (strain JEC21 / ATCC MYA-565) GN=SNX4 PE=3 SV=1	629	246.899	8.82289e-84	50.92	2	2	814	0	181	425
TRINITY_DN4311_c0_g1	1	1107	312	21.95	25.96	sp|P14065|GCY1_YEAST Glycerol 2-dehydrogenase (NADP(+)) OS=Saccharomyces cerevisiae (strain ATCC 204508 / S288c) GN=GCY1 PE=1 SV=1	149	62.003	2.9775e-39	48.15	-2	12	254	0	194	274
TRINITY_DN3589_c0_g1	1	1071	5376	58.54	4.02	sp|O88799|ZAN_MOUSE Zonadhesin OS=Mus musculus GN=Zan PE=1 SV=1	153	63.5438	1.4807e-09	29.09	2	257	883	0	793	1008
TRINITY_DN6726_c0_g1	1	1059	1058	76.49	25.43	sp|W7N2C1|FUB8_GIBM7 Non-canonical non-ribosomal peptide synthetase FUB8 OS=Gibberella moniliformis (strain M3125 / FGSC 7600) GN=FUB8 PE=1 SV=1	201	82.0333	1.03468e-15	29.93	-1	1	810	0	192	460
TRINITY_DN6171_c0_g2	1	1053	276	67.24	85.87	sp|B8NM79|USTS_ASPFN Glutathione S-transferase-like protein ustS OS=Aspergillus flavus (strain ATCC 200026 / FGSC A1120 / NRRL 3357 / JCM 12722 / SRRC 167) GN=ustS PE=1 SV=2	164	67.781	1.5314e-11	24.3	-2	27	734	0	23	259
TRINITY_DN6700_c0_g1	1	1044	371	27.87	25.34	sp|Q9UUE7|CDC73_SCHPO Cell division control protein 73 OS=Schizosaccharomyces pombe (strain 972 / ATCC 24843) GN=cdc73 PE=3 SV=1	286	114.775	1.95709e-27	51.55	-2	186	476	0	266	359
TRINITY_DN8384_c2_g2	1	1031	572	24.73	11.54	sp|A2BGL3|WSCD2_DANRE WSC domain-containing protein 2 OS=Danio rerio GN=wscd2 PE=3 SV=1	129	54.299	9.17611e-07	34.88	-3	574	828	0	165	230
TRINITY_DN2988_c0_g1	1	1025	373	68.49	56.3	sp|P0C8Q0|UBX1_EMENI UBX domain-containing protein 1 OS=Emericella nidulans (strain FGSC A4 / ATCC 38163 / CBS 112.46 / NRRL 194 / M139) GN=ubx1 PE=3 SV=1	344	137.117	3.47602e-35	38.4	1	319	1020	0	113	322
TRINITY_DN4627_c0_g1	1	1013	442	88.55	66.74	sp|P0CQ96|SUB2_CRYNJ ATP-dependent RNA helicase SUB2 OS=Cryptococcus neoformans var. neoformans serotype D (strain JEC21 / ATCC MYA-565) GN=SUB2 PE=3 SV=1	1096	426.787	5.2088e-146	72.58	-1	9	905	0	12	306
TRINITY_DN5167_c0_g1	1	1008	186	60.42	78.49	sp|Q66HA6|ARL8B_RAT ADP-ribosylation factor-like protein 8B OS=Rattus norvegicus GN=Arl8b PE=2 SV=1	349	139.043	1.06361e-37	39.41	-1	244	852	0	27	172
TRINITY_DN6570_c0_g1	1	995	315	52.76	53.02	sp|Q8BJU0|SGTA_MOUSE Small glutamine-rich tetratricopeptide repeat-containing protein alpha OS=Mus musculus GN=Sgta PE=1 SV=2	326	130.183	2.86657e-33	40.57	-3	454	978	0	1	167
TRINITY_DN5011_c0_g1	1	983	220	41.81	59.55	sp|P61518|CAN_SHIFL Carbonic anhydrase 2 OS=Shigella flexneri GN=can PE=3 SV=1	263	105.916	2.66914e-25	38.69	3	201	611	0	4	134
TRINITY_DN3172_c0_g1	1	972	910	95.68	32.75	sp|O14089|IMB2_SCHPO Importin subunit beta-2 OS=Schizosaccharomyces pombe (strain 972 / ATCC 24843) GN=kap104 PE=3 SV=1	637	249.98	9.02301e-74	44.69	-3	2	931	0	128	425
TRINITY_DN4899_c0_g2	1	960	385	91.56	72.21	sp|Q01752|AAD_PHACH Aryl-alcohol dehydrogenase [NADP(+)] OS=Phanerochaete chrysosporium PE=1 SV=1	884	345.125	4.43253e-115	59.12	-3	80	958	0	108	385
TRINITY_DN5479_c0_g4	1	955	644	49.32	24.53	sp|Q70DX9|SED1_ASPFU Tripeptidyl-peptidase sed1 OS=Neosartorya fumigata (strain ATCC MYA-4609 / Af293 / CBS 101355 / FGSC A1100) GN=sed1 PE=1 SV=1	359	142.895	1.16787e-36	41.77	-3	108	578	0	22	179
TRINITY_DN3972_c0_g1	1	943	1191	32.45	8.56	sp|P0CO92|MSH3_CRYNJ DNA mismatch repair protein MSH3 OS=Cryptococcus neoformans var. neoformans serotype D (strain JEC21 / ATCC MYA-565) GN=MSH3 PE=3 SV=1	330	131.724	5.38588e-32	58.82	-2	1	306	0	247	348
TRINITY_DN1787_c0_g1	1	933	377	74.28	62.6	sp|P0CP54|CCPR_CRYNJ Cytochrome c peroxidase, mitochondrial OS=Cryptococcus neoformans var. neoformans serotype D (strain JEC21 / ATCC MYA-565) GN=CCP1 PE=3 SV=1	630	247.284	2.60761e-77	55.79	2	239	931	0	12	247
TRINITY_DN2672_c0_g1	1	923	688	33.8	14.53	sp|Q5XI05|SE1L2_RAT Protein sel-1 homolog 2 OS=Rattus norvegicus GN=Sel1l2 PE=2 SV=1	253	102.064	1.75438e-22	49.04	-1	543	854	0	537	636
TRINITY_DN3423_c0_g3	1	895	445	47.93	28.31	sp|Q6GP52|BECN1_XENLA Beclin-1 OS=Xenopus laevis GN=becn1 PE=2 SV=1	155	64.3142	2.54552e-10	29.37	-2	58	486	0	76	201
TRINITY_DN8671_c0_g3	1	891	598	35.35	16.89	sp|Q9P7T9|YI7H_SCHPO Uncharacterized membrane protein C977.17 OS=Schizosaccharomyces pombe (strain 972 / ATCC 24843) GN=SPAC977.17 PE=3 SV=1	148	61.6178	2.8995e-09	35.24	2	209	523	0	308	408
TRINITY_DN7123_c0_g1	1	866	930	66.86	16.77	sp|Q5AXD1|MCD4_EMENI GPI ethanolamine phosphate transferase 1 OS=Emericella nidulans (strain FGSC A4 / ATCC 38163 / CBS 112.46 / NRRL 194 / M139) GN=mcd4 PE=3 SV=1	356	141.739	1.40057e-37	40.41	2	287	865	0	89	244
TRINITY_DN3453_c0_g1	1	856	388	43.46	29.9	sp|A1CFL1|PATD_ASPCL Alcohol dehydrogenase patD OS=Aspergillus clavatus (strain ATCC 1007 / CBS 513.65 / DSM 816 / NCTC 3887 / NRRL 1) GN=patD PE=1 SV=1	241	97.4413	7.79352e-22	43.55	-1	5	376	0	16	131
TRINITY_DN3997_c0_g2	1	839	1192	44.7	9.06	sp|Q9HES8|PYC_ASPNG Pyruvate carboxylase OS=Aspergillus niger GN=pyc PE=3 SV=1	323	129.028	1.94007e-31	51.59	-2	347	721	0	1042	1149
TRINITY_DN2308_c0_g2	1	827	288	71.1	61.11	sp|Q5R7E3|HMOX1_PONAB Heme oxygenase 1 OS=Pongo abelii GN=HMOX1 PE=2 SV=1	246	99.3673	7.3583e-23	34.18	2	170	757	0	13	188
TRINITY_DN3067_c0_g1	1	821	630	16.81	7.3	sp|P0CM60|VAC8_CRYNJ Vacuolar protein 8 OS=Cryptococcus neoformans var. neoformans serotype D (strain JEC21 / ATCC MYA-565) GN=VAC8 PE=3 SV=1	207	84.3445	5.55133e-17	73.91	-1	663	800	0	451	496
TRINITY_DN7758_c0_g3	1	811	375	41.06	29.07	sp|Q03QJ0|MNMA_LACBA tRNA-specific 2-thiouridylase MnmA OS=Lactobacillus brevis (strain ATCC 367 / JCM 1170) GN=mnmA PE=3 SV=1	293	117.472	4.98536e-51	52.21	-1	2	334	0	104	212
TRINITY_DN3549_c0_g1	1	803	279	26.53	26.16	sp|Q9US20|YLD2_SCHPO Uncharacterized acyltransferase C1851.02 OS=Schizosaccharomyces pombe (strain 972 / ATCC 24843) GN=SPAC1851.02 PE=3 SV=1	186	76.2554	4.39548e-15	49.32	-3	589	801	0	165	237
TRINITY_DN6962_c0_g3	1	798	669	29.32	11.66	sp|P36013|MAOM_YEAST NAD-dependent malic enzyme, mitochondrial OS=Saccharomyces cerevisiae (strain ATCC 204508 / S288c) GN=MAE1 PE=1 SV=1	206	83.9593	7.30499e-32	48.72	-1	127	360	0	166	243
TRINITY_DN7772_c0_g1	1	792	937	81.06	20.49	sp|O13396|MSH2_NEUCR DNA mismatch repair protein msh-2 OS=Neurospora crassa (strain ATCC 24698 / 74-OR23-1A / CBS 708.71 / DSM 1257 / FGSC 987) GN=msh-2 PE=3 SV=1	388	154.066	2.05661e-40	42.06	-2	150	791	0	179	370
TRINITY_DN7845_c0_g5	1	787	678	40.03	15.49	sp|Q9URZ5|VPS1_SCHPO Vacuolar protein sorting-associated protein 1 OS=Schizosaccharomyces pombe (strain 972 / ATCC 24843) GN=vps1 PE=3 SV=2	297	119.013	1.29294e-28	55.24	-1	179	493	0	574	678
TRINITY_DN5150_c0_g1	1	783	593	22.61	9.95	sp|Q8T6B7|ABCF2_DICDI ABC transporter F family member 2 OS=Dictyostelium discoideum GN=abcF2 PE=3 SV=1	181	74.3294	7.96732e-14	52.54	-3	605	781	0	515	573
TRINITY_DN5387_c1_g1	1	773	174	71.02	95.98	sp|P25338|YGB0_YEAST Uncharacterized endoplasmic reticulum membrane protein YGL010W OS=Saccharomyces cerevisiae (strain ATCC 204508 / S288c) GN=YGL010W PE=1 SV=2	212	86.2705	4.41645e-19	29.63	3	72	620	0	4	170
TRINITY_DN2738_c0_g2	1	768	403	43.36	26.3	sp|Q4QR99|TGT_RAT Queuine tRNA-ribosyltransferase catalytic subunit 1 OS=Rattus norvegicus GN=Qtrt1 PE=2 SV=1	362	144.05	1.62175e-64	64.86	2	350	682	0	137	242
TRINITY_DN3467_c0_g1	1	764	533	99.74	47.47	sp|Q12739|LAC2_PLEOS Laccase-2 OS=Pleurotus ostreatus GN=POX2 PE=1 SV=1	849	331.643	5.30715e-109	68.5	-2	2	763	0	178	430
TRINITY_DN2676_c0_g1	1	738	476	87.8	45.38	sp|Q4P6N7|RUVB2_USTMA RuvB-like helicase 2 OS=Ustilago maydis (strain 521 / FGSC 9021) GN=RVB2 PE=3 SV=1	804	314.309	3.92044e-103	74.54	3	3	650	0	226	441
TRINITY_DN8208_c0_g3	1	733	1515	99.45	16.04	sp|P39109|YCFI_YEAST Metal resistance protein YCF1 OS=Saccharomyces cerevisiae (strain ATCC 204508 / S288c) GN=YCF1 PE=1 SV=2	557	219.164	6.16511e-63	49.18	2	5	733	0	1031	1273
TRINITY_DN9258_c1_g5	1	720	580	50.83	20.17	sp|O13902|DAK1_SCHPO Dihydroxyacetone kinase 1 OS=Schizosaccharomyces pombe (strain 972 / ATCC 24843) GN=dak1 PE=3 SV=1	212	86.2705	9.45206e-18	39.02	1	1	366	0	464	580
TRINITY_DN4209_c0_g1	1	716	146	52.37	69.86	sp|P34121|COAA_DICDI Coactosin OS=Dictyostelium discoideum GN=coaA PE=1 SV=1	159	65.855	2.55633e-14	34.92	1	268	642	0	34	135
TRINITY_DN4020_c0_g2	1	712	542	70.37	30.26	sp|P30574|CBPY_CANAX Carboxypeptidase Y OS=Candida albicans GN=CPY1 PE=2 SV=2	326	130.183	2.2789e-33	37.72	-2	4	504	0	374	537
TRINITY_DN9077_c2_g3	1	704	516	80.54	32.17	sp|Q9ZU50|BAT1_ARATH Amino-acid permease BAT1 OS=Arabidopsis thaliana GN=BAT1 PE=2 SV=2	259	104.375	3.66142e-24	35.45	-1	111	677	0	349	514
TRINITY_DN6256_c0_g4	1	691	1676	75.11	10.98	sp|Q00083|APSA_EMENI Anucleate primary sterigmata protein A OS=Emericella nidulans (strain FGSC A4 / ATCC 38163 / CBS 112.46 / NRRL 194 / M139) GN=apsA PE=1 SV=2	144	60.077	3.80089e-09	26.63	-2	7	525	0	57	240
TRINITY_DN1588_c0_g2	1	670	207	78.36	87.92	sp|P43557|FMP32_YEAST Protein FMP32, mitochondrial OS=Saccharomyces cerevisiae (strain ATCC 204508 / S288c) GN=FMP32 PE=1 SV=1	270	108.612	3.12666e-27	34.62	2	146	670	0	9	190
TRINITY_DN2572_c0_g1	1	666	505	54.5	23.96	sp|P0AG17|PUR1_SHIFL Amidophosphoribosyltransferase OS=Shigella flexneri GN=purF PE=3 SV=2	371	147.517	9.63578e-40	59.5	2	2	364	0	369	489
TRINITY_DN319_c0_g2	1	632	368	55.54	31.79	sp|Q9LNK7|NIPA3_ARATH Probable magnesium transporter NIPA3 OS=Arabidopsis thaliana GN=At1g34470 PE=2 SV=1	312	124.79	3.90497e-32	52.14	-3	277	627	0	192	308
TRINITY_DN1820_c0_g1	1	627	344	83.25	49.13	sp|P38768|PIH1_YEAST Protein interacting with Hsp90 1 OS=Saccharomyces cerevisiae (strain ATCC 204508 / S288c) GN=PIH1 PE=1 SV=1	127	53.5286	2.96481e-07	27.08	-2	84	605	0	28	196
TRINITY_DN6851_c0_g6	1	624	156	72.6	96.79	sp|P79781|RS27A_CHICK Ubiquitin-40S ribosomal protein S27a OS=Gallus gallus GN=RPS27A PE=2 SV=3	579	227.639	5.09897e-74	86.75	-2	105	557	0	1	151
TRINITY_DN8372_c0_g2	1	616	1086	56.49	10.68	sp|P30316|DPOD_SCHPO DNA polymerase delta catalytic subunit OS=Schizosaccharomyces pombe (strain 972 / ATCC 24843) GN=pol3 PE=1 SV=2	451	178.333	2.82949e-67	73.28	3	6	353	0	729	844
TRINITY_DN1750_c0_g2	1	612	1066	99.51	16.51	sp|Q9Y8G7|C505_FUSOX Bifunctional cytochrome P450/NADPH--P450 reductase OS=Fusarium oxysporum GN=CYP505 PE=1 SV=1	216	87.8113	2.76252e-18	32.58	3	3	611	0	340	515
TRINITY_DN936_c0_g1	1	605	138	60.99	89.86	sp|Q54CL4|GOT1_DICDI Protein transport protein got1 homolog OS=Dictyostelium discoideum GN=golt1 PE=3 SV=1	240	97.0561	9.39659e-24	49.19	2	116	484	0	6	129
TRINITY_DN6635_c0_g2	1	594	637	22.22	6.91	sp|Q4PGT8|CMR1_USTMA DNA damage-binding protein CMR1 OS=Ustilago maydis (strain 521 / FGSC 9021) GN=UMAG_00675 PE=3 SV=1	112	47.7506	2.89578e-06	50	2	122	253	0	592	635
TRINITY_DN2641_c0_g1	1	590	1666	69.66	7.98	sp|Q10161|CLH_SCHPO Probable clathrin heavy chain OS=Schizosaccharomyces pombe (strain 972 / ATCC 24843) GN=chc1 PE=1 SV=1	288	115.546	1.05998e-27	49.64	1	1	411	0	1510	1642
TRINITY_DN10537_c0_g1	1	587	927	96.08	20.17	sp|Q6P286|DHTK1_XENLA Probable 2-oxoglutarate dehydrogenase E1 component DHKTD1, mitochondrial OS=Xenopus laevis GN=dhtkd1 PE=2 SV=1	475	187.578	2.40874e-53	46.03	3	3	566	0	443	629
TRINITY_DN4434_c0_g1	1	579	91	59.07	87.91	sp|Q5R628|LSM5_PONAB U6 snRNA-associated Sm-like protein LSm5 OS=Pongo abelii GN=LSM5 PE=3 SV=3	246	99.3673	2.93047e-25	48.25	3	84	425	0	11	90
TRINITY_DN7637_c0_g1	1	573	551	32.46	11.25	sp|P49374|HGT1_KLULA High-affinity glucose transporter OS=Kluyveromyces lactis (strain ATCC 8585 / CBS 2359 / DSM 70799 / NBRC 1267 / NRRL Y-1140 / WM37) GN=HGT1 PE=3 SV=1	113	48.1358	2.32544e-13	37.1	1	241	426	0	58	119
TRINITY_DN762_c0_g1	1	571	146	56.74	73.97	sp|Q9FJX2|RL262_ARATH 60S ribosomal protein L26-2 OS=Arabidopsis thaliana GN=RPL26B PE=2 SV=1	403	159.844	6.46633e-48	66.67	3	204	527	0	7	114
TRINITY_DN3025_c0_g1	1	563	298	98.58	50	sp|Q9NWX6|THG1_HUMAN Probable tRNA(His) guanylyltransferase OS=Homo sapiens GN=THG1L PE=1 SV=2	257	103.605	4.32814e-25	34.04	2	8	562	0	22	170
TRINITY_DN5697_c0_g3	1	560	449	65.89	28.73	sp|Q7TT45|RRAGD_MOUSE Ras-related GTP-binding protein D OS=Mus musculus GN=Rragd PE=1 SV=2	245	98.9821	4.89729e-23	40.77	2	191	559	0	111	239
TRINITY_DN4285_c0_g1	1	539	147	41.19	50.34	sp|Q9CZY3|UB2V1_MOUSE Ubiquitin-conjugating enzyme E2 variant 1 OS=Mus musculus GN=Ube2v1 PE=1 SV=1	215	87.4261	1.50324e-27	48.65	1	235	456	0	57	130
TRINITY_DN1744_c0_g1	1	507	109	56.8	64.22	sp|P52808|RL30A_SCHPO 60S ribosomal protein L30-1 OS=Schizosaccharomyces pombe (strain 972 / ATCC 24843) GN=rpl3001 PE=3 SV=2	253	102.064	2.28711e-26	55.21	-1	1	288	0	19	88
TRINITY_DN5212_c0_g2	1	505	126	74.85	100	sp|P19984|PROF2_ACACA Profilin-2 OS=Acanthamoeba castellanii PE=1 SV=3	355	141.354	2.35142e-41	53.17	3	60	437	0	1	126
TRINITY_DN2264_c0_g1	1	487	1272	96.71	12.74	sp|Q9HAU5|RENT2_HUMAN Regulator of nonsense transcripts 2 OS=Homo sapiens GN=UPF2 PE=1 SV=1	439	173.711	1.96064e-48	49.7	-1	5	475	0	817	978
TRINITY_DN3133_c0_g1	1	464	854	91.81	15.46	sp|P12945|NAT1_YEAST N-terminal acetyltransferase A complex subunit NAT1 OS=Saccharomyces cerevisiae (strain ATCC 204508 / S288c) GN=NAT1 PE=1 SV=2	254	102.449	6.59248e-24	37.76	-3	13	438	0	379	510
TRINITY_DN3254_c0_g3	1	449	2310	98.89	6.88	sp|O14002|MAK2_SCHPO Peroxide stress-activated histidine kinase mak2 OS=Schizosaccharomyces pombe (strain 972 / ATCC 24843) GN=mak2 PE=3 SV=1	137	57.3806	9.38301e-09	27.04	-3	4	447	0	391	549
TRINITY_DN2184_c0_g1	1	447	2493	78.52	4.69	sp|O60055|UTP20_SCHPO U3 small nucleolar RNA-associated protein 20 OS=Schizosaccharomyces pombe (strain 972 / ATCC 24843) GN=utp20 PE=3 SV=1	151	62.7734	2.19464e-10	33.33	-3	68	418	0	2364	2480
TRINITY_DN9803_c0_g1	1	435	632	91.03	20.09	sp|Q9CL21|RECQ_PASMU ATP-dependent DNA helicase RecQ OS=Pasteurella multocida (strain Pm70) GN=recQ PE=3 SV=1	190	77.7962	9.35632e-16	36.76	1	7	402	0	102	228
TRINITY_DN990_c0_g1	1	383	1324	99.48	9.52	sp|P41004|SMC4_SCHPO Structural maintenance of chromosomes protein 4 OS=Schizosaccharomyces pombe (strain 972 / ATCC 24843) GN=cut3 PE=1 SV=2	123	51.9878	4.2846e-07	29.92	3	3	383	0	779	904
TRINITY_DN735_c0_g1	1	378	344	21.43	7.85	sp|Q10078|PPK13_SCHPO Serine/threonine-protein kinase ppk13 OS=Schizosaccharomyces pombe (strain 972 / ATCC 24843) GN=ppk13 PE=3 SV=2	86	37.7354	1.99518e-07	59.26	-2	156	236	0	25	51
TRINITY_DN1599_c0_g2	1	364	1080	59.34	5.83	sp|Q54EW2|Y9130_DICDI Putative bifunctional amine oxidase DDB_G0291301 OS=Dictyostelium discoideum GN=DDB_G0291301 PE=1 SV=1	114	48.521	4.73489e-06	45.33	-2	7	222	0	525	587
TRINITY_DN1062_c0_g1	1	361	557	70.64	15.62	sp|P04802|SYDC_YEAST Aspartate--tRNA ligase, cytoplasmic OS=Saccharomyces cerevisiae (strain ATCC 204508 / S288c) GN=DPS1 PE=1 SV=3	291	116.701	6.33167e-30	68.97	-3	105	359	0	471	557
TRINITY_DN113_c0_g1	1	351	1066	94.02	10.41	sp|Q9Y8G7|C505_FUSOX Bifunctional cytochrome P450/NADPH--P450 reductase OS=Fusarium oxysporum GN=CYP505 PE=1 SV=1	211	85.8853	1.1102e-18	42.34	-3	17	346	0	743	853
TRINITY_DN3482_c0_g2	1	342	290	37.72	14.14	sp|Q6GLV4|UBX1B_XENLA UBX domain-containing protein 1-B OS=Xenopus laevis GN=ubxn1-b PE=2 SV=1	118	50.0618	7.22881e-07	51.16	-1	130	258	0	8	48
TRINITY_DN43_c0_g1	1	333	325	27.03	9.23	sp|Q86BS6|METL_DROME Methyltransferase-like protein OS=Drosophila melanogaster GN=metl PE=1 SV=2	111	47.3654	5.50311e-06	80	-3	101	190	0	294	323
TRINITY_DN3054_c0_g1	1	310	766	98.71	11.1	sp|P33277|GAP1_SCHPO GTPase-activating protein OS=Schizosaccharomyces pombe (strain 972 / ATCC 24843) GN=gap1 PE=4 SV=1	162	67.0106	2.13151e-12	34.31	-3	3	308	0	370	454
TRINITY_DN2005_c0_g1	1	292	493	40.07	7.91	sp|Q17770|PDI2_CAEEL Protein disulfide-isomerase 2 OS=Caenorhabditis elegans GN=pdi-2 PE=1 SV=1	114	48.521	2.38577e-06	48.72	1	43	159	0	432	470
TRINITY_DN10137_c0_g1	1	283	607	99.65	15.49	sp|Q05506|SYRC_YEAST Arginine--tRNA ligase, cytoplasmic OS=Saccharomyces cerevisiae (strain ATCC 204508 / S288c) GN=YDR341C PE=1 SV=1	346	137.887	6.6298e-38	67.02	-1	2	283	0	397	490
TRINITY_DN2066_c0_g2	1	246	441	98.78	20.63	sp|Q84M92|ARP4_ARATH Actin-related protein 4 OS=Arabidopsis thaliana GN=ARP4 PE=1 SV=1	144	60.077	1.68113e-10	37.36	-2	3	245	0	5	95
TRINITY_DN2735_c0_g1	1	225	541	88	12.2	sp|Q4PHN4|EIF3E_USTMA Eukaryotic translation initiation factor 3 subunit E OS=Ustilago maydis (strain 521 / FGSC 9021) GN=INT6 PE=3 SV=1	190	77.7962	9.51912e-17	48.48	-2	3	200	0	4	69
TRINITY_DN3972_c0_g2	1	219	1133	100	6.97	sp|A6RPB6|MSH3_BOTFB DNA mismatch repair protein msh3 OS=Botryotinia fuckeliana (strain B05.10) GN=msh3 PE=3 SV=2	149	62.003	4.58868e-11	43.9	1	1	219	0	334	412
TRINITY_DN8458_c0_g1	1	8332	331	3.42	28.7	sp|P40896|YJV3_YEAST Uncharacterized protein YJL213W OS=Saccharomyces cerevisiae (strain ATCC 204508 / S288c) GN=YJL213W PE=3 SV=1	135	56.6102	1.58416e-06	38	-2	1012	1296	0	20	114
TRINITY_DN5342_c0_g4	1	6865	2027	40.6	40.31	sp|Q8CIQ7|DOCK3_MOUSE Dedicator of cytokinesis protein 3 OS=Mus musculus GN=Dock3 PE=1 SV=1	822	321.242	8.07733e-87	27.13	-2	3184	5970	0	76	892
TRINITY_DN7796_c0_g1	1	6180	926	38.4	78.94	sp|A2VCW9|AASS_RAT Alpha-aminoadipic semialdehyde synthase, mitochondrial OS=Rattus norvegicus GN=Aass PE=2 SV=1	952	371.318	1.64771e-113	31.23	-1	130	2502	0	186	916
TRINITY_DN8242_c1_g4	1	5700	867	15.53	30.45	sp|O59712|YBH4_SCHPO Uncharacterized transporter C3B8.04c OS=Schizosaccharomyces pombe (strain 972 / ATCC 24843) GN=SPBC3B8.04c PE=3 SV=1	481	189.889	8.08563e-81	45.76	3	1785	2669	0	443	706
TRINITY_DN8055_c0_g2	1	5502	1541	56.92	67.75	sp|Q63120|MRP2_RAT Canalicular multispecific organic anion transporter 1 OS=Rattus norvegicus GN=Abcc2 PE=1 SV=1	1517	588.956	2.97272e-178	36.03	-2	2364	5495	0	489	1532
TRINITY_DN7130_c0_g3	1	5269	1190	34.85	48.49	sp|O14114|YEJJ_SCHPO Uncharacterized AAA domain-containing protein C31G5.19 OS=Schizosaccharomyces pombe (strain 972 / ATCC 24843) GN=SPAC31G5.19 PE=3 SV=1	1436	557.755	8.07628e-171	48.86	1	1780	3615	0	234	810
TRINITY_DN9239_c0_g1	1	5091	570	11.2	27.02	sp|O13899|YF38_SCHPO Uncharacterized CDP-alcohol phosphatidyltransferase class-I family protein C22A12.08c OS=Schizosaccharomyces pombe (strain 972 / ATCC 24843) GN=SPAC22A12.08c PE=3 SV=1	201	82.0333	2.89914e-32	28.65	-2	3906	4475	0	137	290
TRINITY_DN8713_c0_g1	1	4893	1909	26.06	20.06	sp|Q8R151|ZNFX1_MOUSE NFX1-type zinc finger-containing protein 1 OS=Mus musculus GN=Znfx1 PE=1 SV=3	609	239.195	5.05292e-62	33.88	-3	827	2101	0	915	1297
TRINITY_DN8122_c0_g3	1	4708	534	16.89	50	sp|Q54MJ7|ALAM_DICDI Probable alanine aminotransferase, mitochondrial OS=Dictyostelium discoideum GN=gpt PE=3 SV=1	633	248.44	5.0603e-105	47.39	1	2155	2949	0	183	449
TRINITY_DN8728_c1_g1	1	4531	565	6.16	15.93	sp|A0A0E0RTV6|ZEB1_GIBZE FAD-linked oxidoreductase ZEB1 OS=Gibberella zeae (strain PH-1 / ATCC MYA-4620 / FGSC 9075 / NRRL 31084) GN=ZEB1 PE=2 SV=2	245	98.9821	5.62302e-48	49.46	3	2208	2486	0	116	205
TRINITY_DN7114_c0_g1	1	4428	248	15.65	91.13	sp|Q9HDW9|GPI12_SCHPO Probable N-acetylglucosaminyl-phosphatidylinositol de-N-acetylase OS=Schizosaccharomyces pombe (strain 972 / ATCC 24843) GN=gpi12 PE=3 SV=1	362	144.05	4.22165e-36	36.13	-3	3578	4270	0	21	246
TRINITY_DN8751_c1_g2	1	4232	2062	77.06	52.76	sp|Q54YZ9|DHKJ_DICDI Hybrid signal transduction histidine kinase J OS=Dictyostelium discoideum GN=dhkJ PE=3 SV=2	2610	1009.98	0	53.74	-2	11	3271	0	727	1814
TRINITY_DN8340_c0_g3	1	4080	1369	40.44	40.98	sp|Q09706|PLD1_SCHPO Phospholipase D1 OS=Schizosaccharomyces pombe (strain 972 / ATCC 24843) GN=pld1 PE=1 SV=1	1619	628.246	0	53.2	3	1989	3638	0	463	1023
TRINITY_DN5621_c0_g1	1	4005	639	37.45	68.39	sp|O74534|SLY1_SCHPO Protein sly1 OS=Schizosaccharomyces pombe (strain 972 / ATCC 24843) GN=sly1 PE=3 SV=1	794	310.457	5.45034e-90	38.58	-1	1573	3072	0	203	639
TRINITY_DN7328_c0_g1	1	3914	508	11.65	26.57	sp|P0DPA7|PSIH_PSICU Cytochrome P450 monooxygenase psiH OS=Psilocybe cubensis GN=psiH PE=1 SV=1	160	66.2402	7.06814e-18	34.39	2	3311	3766	0	172	306
TRINITY_DN7811_c0_g2	1	3861	761	12.35	20.37	sp|Q93075|TATD2_HUMAN Putative deoxyribonuclease TATDN2 OS=Homo sapiens GN=TATDN2 PE=1 SV=2	335	133.65	2.06271e-30	45	2	2300	2776	0	566	720
TRINITY_DN6354_c0_g1	1	3705	599	34.82	70.62	sp|Q64285|CEL_MOUSE Bile salt-activated lipase OS=Mus musculus GN=Cel PE=1 SV=1	353	140.584	3.37377e-36	30.69	-2	1359	2648	0	124	546
TRINITY_DN8658_c0_g1	1	3636	957	64.36	80.25	sp|P0CM44|BRO1_CRYNJ Vacuolar protein-sorting protein BRO1 OS=Cryptococcus neoformans var. neoformans serotype D (strain JEC21 / ATCC MYA-565) GN=BRO1 PE=3 SV=1	1904	738.028	0	50.56	-1	1216	3555	0	1	768
TRINITY_DN8809_c0_g2	1	3569	382	28.92	90.31	sp|O60198|METK_SCHPO S-adenosylmethionine synthase OS=Schizosaccharomyces pombe (strain 972 / ATCC 24843) GN=sam1 PE=1 SV=1	1383	537.339	1.13651e-178	81.16	1	2536	3567	0	5	349
TRINITY_DN5823_c0_g1	1	3511	432	24.69	66.44	sp|P38866|FMO1_YEAST Thiol-specific monooxygenase OS=Saccharomyces cerevisiae (strain ATCC 204508 / S288c) GN=FMO1 PE=1 SV=2	305	122.094	1.12998e-27	31.58	2	407	1273	0	70	356
TRINITY_DN8544_c0_g1	1	3468	1194	27.51	27.05	sp|O42649|SMC3_SCHPO Structural maintenance of chromosomes protein 3 OS=Schizosaccharomyces pombe (strain 972 / ATCC 24843) GN=psm3 PE=1 SV=1	927	361.688	4.31898e-104	56.79	2	5	958	0	871	1193
TRINITY_DN8749_c0_g1	1	3404	717	61.69	100	sp|P14742|GFA1_YEAST Glutamine--fructose-6-phosphate aminotransferase [isomerizing] OS=Saccharomyces cerevisiae (strain ATCC 204508 / S288c) GN=GFA1 PE=1 SV=4	2251	871.692	0	61.19	3	1167	3266	0	1	717
TRINITY_DN7599_c0_g1	1	3296	779	18.11	27.34	sp|O43264|ZW10_HUMAN Centromere/kinetochore protein zw10 homolog OS=Homo sapiens GN=ZW10 PE=1 SV=3	166	68.5514	1.46765e-11	25.69	2	2243	2839	0	518	730
TRINITY_DN7879_c3_g8	1	3259	562	15.56	29.54	sp|P29094|O16G_GEOTM Oligo-1,6-glucosidase OS=Geobacillus thermoglucosidasius GN=malL PE=1 SV=1	309	123.635	7.35333e-28	36.47	2	2	508	0	392	557
TRINITY_DN7737_c1_g1	1	3131	165	7.86	49.7	sp|P30050|RL12_HUMAN 60S ribosomal protein L12 OS=Homo sapiens GN=RPL12 PE=1 SV=1	311	124.405	6.19878e-51	70.73	3	462	707	0	83	164
TRINITY_DN7411_c0_g2	1	3096	885	9.59	10.28	sp|Q54ST3|Y2237_DICDI DDT domain-containing protein DDB_G0282237 OS=Dictyostelium discoideum GN=DDB_G0282237 PE=3 SV=1	136	56.9954	1.05206e-06	35.35	2	188	484	0	411	501
TRINITY_DN4990_c0_g1	1	2982	825	10.06	11.52	sp|P10563|QUTA_EMENI Quinic acid utilization activator OS=Emericella nidulans (strain FGSC A4 / ATCC 38163 / CBS 112.46 / NRRL 194 / M139) GN=qutA PE=4 SV=2	130	54.6842	3.8898e-06	37.14	1	466	765	0	8	102
TRINITY_DN8215_c1_g2	1	2948	754	50.68	63.93	sp|Q09860|SYC_SCHPO Probable cysteine--tRNA ligase OS=Schizosaccharomyces pombe (strain 972 / ATCC 24843) GN=SPAC29E6.06c PE=3 SV=1	1211	471.085	3.6382e-153	49.9	3	3	1496	0	93	574
TRINITY_DN7728_c0_g4	1	2921	2968	74.67	24.8	sp|P0CP61|ATM_CRYNB Serine/threonine-protein kinase TEL1 OS=Cryptococcus neoformans var. neoformans serotype D (strain B-3501A) GN=TEL1 PE=3 SV=1	476	187.963	5.59019e-47	26.3	1	736	2916	0	1441	2176
TRINITY_DN7789_c0_g1	1	2854	560	33.85	55.71	sp|B2SH83|ILVD_FRATM Dihydroxy-acid dehydratase OS=Francisella tularensis subsp. mediasiatica (strain FSC147) GN=ilvD PE=3 SV=1	1046	407.527	1.14013e-169	58.7	-2	1756	2721	0	24	335
TRINITY_DN9227_c1_g2	1	2822	519	62.19	86.51	sp|Q9P6J7|YHD3_SCHPO Uncharacterized MFS-type transporter C1683.03c OS=Schizosaccharomyces pombe (strain 972 / ATCC 24843) GN=SPBC1683.03c PE=3 SV=1	317	126.716	4.29583e-29	22.67	3	66	1820	0	46	494
TRINITY_DN5632_c0_g1	1	2792	157	8.92	57.32	sp|B0DX25|YPI1_LACBS Type 1 phosphatases regulator YPI1 OS=Laccaria bicolor (strain S238N-H82 / ATCC MYA-4686) GN=YPI1 PE=3 SV=1	126	53.1434	1.43742e-06	38.89	3	27	275	0	4	93
TRINITY_DN6894_c0_g1	1	2728	671	40.14	54.25	sp|P41889|CUT9_SCHPO Anaphase-promoting complex subunit cut9 OS=Schizosaccharomyces pombe (strain 972 / ATCC 24843) GN=cut9 PE=1 SV=2	649	254.603	2.80074e-71	38.65	1	1294	2388	0	236	599
TRINITY_DN8475_c1_g1	1	2689	623	37.6	52.17	sp|O42626|NRC2_NEUCR Serine/threonine-protein kinase nrc-2 OS=Neurospora crassa (strain ATCC 24698 / 74-OR23-1A / CBS 708.71 / DSM 1257 / FGSC 987) GN=nrc-2 PE=3 SV=1	1054	410.609	1.04307e-129	63.58	-2	907	1917	0	142	466
TRINITY_DN3408_c0_g2	1	2668	1026	92.32	76.02	sp|B0D0P0|PRM1_LACBS Plasma membrane fusion protein PRM1 OS=Laccaria bicolor (strain S238N-H82 / ATCC MYA-4686) GN=PRM1 PE=3 SV=2	1425	553.518	1.35304e-179	42.57	-2	205	2667	0	244	1023
TRINITY_DN5580_c0_g1	1	2645	492	9.41	16.87	sp|Q1HGE8|HSF4_CANLF Heat shock factor protein 4 OS=Canis lupus familiaris GN=HSF4 PE=2 SV=1	146	60.8474	3.27378e-08	34.94	-2	1973	2221	0	26	108
TRINITY_DN9047_c0_g2	1	2623	630	41.86	56.83	sp|P0C1J0|CYP15_RHIO9 Peptidyl-prolyl cis-trans isomerase cyp15 OS=Rhizopus delemar (strain RA 99-880 / ATCC MYA-4621 / FGSC 9543 / NRRL 43880) GN=cyp15 PE=3 SV=1	1098	427.557	9.74785e-146	59.78	-2	1132	2229	0	261	618
TRINITY_DN4880_c0_g1	1	2597	1255	28.42	18.57	sp|B5X0E4|ABCB5_MOUSE ATP-binding cassette sub-family B member 5 OS=Mus musculus GN=Abcb5 PE=2 SV=1	405	160.614	6.7082e-39	42.97	-3	1849	2586	0	1009	1241
TRINITY_DN4065_c0_g1	1	2575	701	34.83	32.24	sp|Q9SRL4|ENAS2_ARATH Cytosolic endo-beta-N-acetylglucosaminidase 2 OS=Arabidopsis thaliana GN=ENGASE2 PE=1 SV=1	222	90.1225	3.15072e-17	31.46	-1	1550	2446	0	109	334
TRINITY_DN5983_c0_g1	1	2549	1165	16.71	11.93	sp|P33289|PEX6_PICPA Peroxisomal biogenesis factor 6 OS=Komagataella pastoris GN=PEX6 PE=3 SV=1	433	171.4	1.97602e-42	58.45	1	1	426	0	980	1118
TRINITY_DN5989_c0_g1	1	2528	444	47.47	78.38	sp|O14189|PP2C5_SCHPO Protein phosphatase 2C homolog C10F6.17c OS=Schizosaccharomyces pombe (strain 972 / ATCC 24843) GN=SPAC10F6.17c PE=3 SV=4	608	238.81	3.73538e-68	38.77	-2	137	1336	0	92	439
TRINITY_DN8291_c0_g1	1	2480	452	52.38	80.09	sp|P20049|TYR1_YEAST Prephenate dehydrogenase [NADP(+)] OS=Saccharomyces cerevisiae (strain ATCC 204508 / S288c) GN=TYR1 PE=1 SV=2	772	301.982	1.97429e-91	41.15	1	1	1299	0	77	438
TRINITY_DN8021_c0_g1	1	2384	603	35.74	48.26	sp|Q54UQ2|PGM2_DICDI Probable phosphoglucomutase-2 OS=Dictyostelium discoideum GN=pgmB PE=3 SV=1	647	253.832	7.44269e-104	46.15	-3	1279	2130	0	1	291
TRINITY_DN5976_c0_g1	1	2363	742	78.21	80.05	sp|P0CM81|COG6_CRYNB Conserved oligomeric Golgi complex subunit 6 OS=Cryptococcus neoformans var. neoformans serotype D (strain B-3501A) GN=COG6 PE=3 SV=1	1211	471.085	9.77e-153	41.35	-3	469	2316	0	10	603
TRINITY_DN9255_c0_g2	1	2336	439	11.04	18.91	sp|P0DPA6|PSID_PSICU L-tryptophan decarboxylase psiD OS=Psilocybe cubensis GN=psiD PE=1 SV=1	203	82.8037	3.18392e-15	44.83	-1	456	713	0	247	329
TRINITY_DN5564_c0_g2	1	2256	1053	87.63	58.69	sp|Q8QHA5|DNA2_XENLA DNA replication ATP-dependent helicase/nuclease DNA2 OS=Xenopus laevis GN=dna2 PE=1 SV=1	715	280.026	3.43567e-79	30.65	3	276	2252	0	84	701
TRINITY_DN4844_c0_g1	1	2214	777	40.38	34.88	sp|Q5ZHT1|ACD11_CHICK Acyl-CoA dehydrogenase family member 11 OS=Gallus gallus GN=ACAD11 PE=2 SV=1	519	204.527	2.00753e-54	39.87	-3	1319	2212	0	51	321
TRINITY_DN7600_c0_g1	1	2199	470	37.93	58.94	sp|P38680|MTR_NEUCR N amino acid transport system protein OS=Neurospora crassa (strain ATCC 24698 / 74-OR23-1A / CBS 708.71 / DSM 1257 / FGSC 987) GN=mtr PE=3 SV=2	320	127.872	6.0759e-30	32.14	3	9	842	0	61	337
TRINITY_DN4696_c0_g1	1	2160	934	97.64	73.34	sp|Q7QG73|AP2A_ANOGA AP-2 complex subunit alpha OS=Anopheles gambiae GN=alpha-Adaptin PE=3 SV=4	1408	546.969	1.58357e-180	44.19	3	30	2138	0	246	930
TRINITY_DN8478_c0_g3	1	2130	1188	76.48	41.41	sp|Q9USG8|MU190_SCHPO Meiotically up-regulated gene 190 protein OS=Schizosaccharomyces pombe (strain 972 / ATCC 24843) GN=mug190 PE=1 SV=1	540	212.616	2.95765e-56	30.14	-2	357	1985	0	490	981
TRINITY_DN8818_c0_g1	1	2112	238	7.81	21.85	sp|K4BND8|MADS4_SOLLC MADS-box protein 04g005320 OS=Solanum lycopersicum GN=Solyc04g005320 PE=3 SV=1	136	56.9954	1.16292e-07	50	-3	1592	1756	0	23	74
TRINITY_DN7317_c0_g1	1	2043	1079	30.54	19.93	sp|B0Y6R2|PPOA_ASPFC Psi-producing oxygenase A OS=Neosartorya fumigata (strain CEA10 / CBS 144.89 / FGSC A1163) GN=ppoA PE=3 SV=1	267	107.457	3.66301e-27	31.51	1	88	711	0	551	765
TRINITY_DN7134_c0_g1	1	1998	380	33.63	57.89	sp|P06245|KAPB_YEAST cAMP-dependent protein kinase type 2 OS=Saccharomyces cerevisiae (strain ATCC 204508 / S288c) GN=TPK2 PE=1 SV=2	630	247.284	4.35891e-99	54.22	1	319	990	0	161	380
TRINITY_DN6141_c0_g1	1	1952	299	23.21	45.15	sp|P36618|CDC16_SCHPO Cell division control protein 16 OS=Schizosaccharomyces pombe (strain 972 / ATCC 24843) GN=cdc16 PE=1 SV=1	309	123.635	1.44084e-29	44.74	-1	1491	1943	0	154	288
TRINITY_DN9238_c1_g1	1	1939	509	52.6	64.44	sp|D4D8U6|CTSD_TRIVH Probable aspartic-type endopeptidase CTSD OS=Trichophyton verrucosum (strain HKI 0517) GN=CTSD PE=3 SV=1	514	202.601	1.33893e-55	37.54	-3	165	1184	0	82	409
TRINITY_DN5241_c0_g1	1	1907	2144	41.69	12.83	sp|Q9H583|HEAT1_HUMAN HEAT repeat-containing protein 1 OS=Homo sapiens GN=HEATR1 PE=1 SV=3	371	147.517	1.89912e-35	33.21	-3	1036	1830	0	23	297
TRINITY_DN4748_c0_g1	1	1891	536	44.42	53.54	sp|Q4WAZ6|FMAG_ASPFU Multifunctional cytochrome P450 monooxygenase af510 OS=Neosartorya fumigata (strain ATCC MYA-4609 / Af293 / CBS 101355 / FGSC A1100) GN=af510 PE=1 SV=1	451	178.333	6.02494e-47	34.95	-3	1050	1889	0	114	400
TRINITY_DN6781_c0_g3	1	1879	2100	98.03	28.24	sp|P87112|NOT1_SCHPO General negative regulator of transcription subunit 1 OS=Schizosaccharomyces pombe (strain 972 / ATCC 24843) GN=not1 PE=1 SV=1	1122	436.802	1.71687e-133	39.75	-3	30	1871	0	620	1212
TRINITY_DN7922_c0_g3	1	1849	367	35.69	52.04	sp|Q2US83|EGLD_ASPOR Probable endo-beta-1,4-glucanase D OS=Aspergillus oryzae (strain ATCC 42149 / RIB 40) GN=eglD PE=3 SV=1	341	135.961	1.14422e-33	37.05	-3	417	1076	0	20	210
TRINITY_DN6332_c0_g1	1	1838	710	51.74	44.93	sp|P39744|NOC2_YEAST Nucleolar complex protein 2 OS=Saccharomyces cerevisiae (strain ATCC 204508 / S288c) GN=NOC2 PE=1 SV=2	628	246.514	4.17781e-70	38.65	3	3	953	0	364	682
TRINITY_DN6337_c0_g1	1	1812	379	40.56	58.05	sp|D4AZ23|LAP4_ARTBC Probable leucine aminopeptidase ARB_01443 OS=Arthroderma benhamiae (strain ATCC MYA-4681 / CBS 112371) GN=ARB_01443 PE=3 SV=1	347	138.272	4.72787e-43	35.86	-2	555	1289	0	92	311
TRINITY_DN7756_c0_g2	1	1787	268	25.85	56.72	sp|P44121|DNLI_HAEIN DNA ligase OS=Haemophilus influenzae (strain ATCC 51907 / DSM 11121 / KW20 / Rd) GN=ligA PE=1 SV=2	207	84.3445	2.7242e-17	37.82	-2	1076	1537	0	77	228
TRINITY_DN7708_c0_g3	1	1765	387	63.91	97.42	sp|Q10452|GSK3_SCHPO Protein kinase gsk3 OS=Schizosaccharomyces pombe (strain 972 / ATCC 24843) GN=gsk3 PE=1 SV=3	1299	504.982	1.57151e-173	65.54	1	271	1398	0	10	386
TRINITY_DN7222_c0_g3	1	1729	354	7.63	12.43	sp|Q5RC28|T3HPD_PONAB Trans-L-3-hydroxyproline dehydratase OS=Pongo abelii GN=L3HYPDH PE=2 SV=1	135	56.6102	2.92269e-07	63.64	2	1505	1636	0	20	63
TRINITY_DN8063_c0_g1	1	1707	332	11.25	19.28	sp|Q53FA7|QORX_HUMAN Quinone oxidoreductase PIG3 OS=Homo sapiens GN=TP53I3 PE=1 SV=2	163	67.3958	1.82786e-21	51.56	3	498	689	0	32	95
TRINITY_DN8826_c1_g6	1	1673	2337	81.77	18.74	sp|Q9Y7K2|TOR2_SCHPO Serine/threonine-protein kinase tor2 OS=Schizosaccharomyces pombe (strain 972 / ATCC 24843) GN=tor2 PE=1 SV=2	1485	576.63	0	62.28	-3	304	1671	0	1866	2303
TRINITY_DN4738_c0_g1	1	1661	567	31.79	32.28	sp|Q60803|TRAF3_MOUSE TNF receptor-associated factor 3 OS=Mus musculus GN=Traf3 PE=1 SV=2	193	78.9518	3.36019e-14	27.32	-3	790	1317	0	112	294
TRINITY_DN3106_c0_g1	1	1650	73	15.82	93.15	sp|Q791B0|UBL5_PSAOB Ubiquitin-like protein 5 OS=Psammomys obesus GN=UBL5 PE=3 SV=1	266	107.071	2.55288e-26	60.92	-2	1311	1571	0	4	71
TRINITY_DN6768_c0_g1	1	1637	476	35.55	40.97	sp|Q12618|ACO1_AJECA Acyl-CoA desaturase OS=Ajellomyces capsulatus GN=OLE1 PE=1 SV=1	585	229.95	2.7069e-112	52.82	-2	59	640	0	236	430
TRINITY_DN3250_c0_g1	1	1626	588	71.22	65.65	sp|P0DPA1|D9043_DICDI WD repeat-containing protein DDB_G0349043 OS=Dictyostelium discoideum GN=DDB_G0349043 PE=4 SV=1	680	266.544	2.09542e-79	37.08	-1	460	1617	0	187	572
TRINITY_DN4270_c0_g2	1	1617	393	14.47	20.36	sp|O13701|TAF7_SCHPO Transcription initiation factor TFIID subunit 7 OS=Schizosaccharomyces pombe (strain 972 / ATCC 24843) GN=taf7 PE=1 SV=1	267	107.457	1.12657e-27	56.25	-3	992	1225	0	75	154
TRINITY_DN5070_c0_g1	1	1606	538	35.12	40.33	sp|Q02527|MGAT3_RAT Beta-1,4-mannosyl-glycoprotein 4-beta-N-acetylglucosaminyltransferase OS=Rattus norvegicus GN=Mgat3 PE=1 SV=2	206	83.9593	9.36972e-16	26.03	1	487	1050	0	211	427
TRINITY_DN4240_c0_g1	1	1550	576	22.06	19.97	sp|Q9C0U7|VPS5_SCHPO Vacuolar protein sorting-associated protein vps5 OS=Schizosaccharomyces pombe (strain 972 / ATCC 24843) GN=vps5 PE=1 SV=1	282	113.235	2.71151e-25	45.3	2	1025	1366	0	202	316
TRINITY_DN6812_c0_g2	1	1532	323	27.81	43.96	sp|P36873|PP1G_HUMAN Serine/threonine-protein phosphatase PP1-gamma catalytic subunit OS=Homo sapiens GN=PPP1CC PE=1 SV=1	560	220.32	1.03792e-103	70.42	1	1033	1458	0	133	274
TRINITY_DN6292_c0_g1	1	1513	909	68.8	36.19	sp|B0D4E6|CHO2_LACBS Phosphatidylethanolamine N-methyltransferase OS=Laccaria bicolor (strain S238N-H82 / ATCC MYA-4686) GN=CHO2 PE=3 SV=1	1161	451.825	3.33359e-147	63.46	-1	2	1042	0	311	639
TRINITY_DN7026_c0_g1	1	1492	321	29.36	47.66	sp|Q10494|YDG7_SCHPO Uncharacterized oxidoreductase C26F1.07 OS=Schizosaccharomyces pombe (strain 972 / ATCC 24843) GN=SPAC26F1.07 PE=3 SV=1	397	157.532	6.64518e-42	50.33	-1	815	1252	0	15	167
TRINITY_DN2673_c0_g1	1	1480	879	35.88	27.99	sp|P0CO41|JHD1_CRYNB JmjC domain-containing histone demethylation protein 1 OS=Cryptococcus neoformans var. neoformans serotype D (strain B-3501A) GN=JHD1 PE=3 SV=1	475	187.578	2.3801e-64	45.75	3	783	1313	0	330	575
TRINITY_DN7554_c0_g1	1	1463	1254	42.45	16.27	sp|Q9FJR0|RENT1_ARATH Regulator of nonsense transcripts 1 homolog OS=Arabidopsis thaliana GN=UPF1 PE=1 SV=2	294	117.857	1.31163e-26	35.16	2	728	1348	0	717	920
TRINITY_DN6640_c0_g1	1	1421	628	31.46	23.73	sp|B0CS18|GUF1_LACBS Translation factor GUF1, mitochondrial OS=Laccaria bicolor (strain S238N-H82 / ATCC MYA-4686) GN=GUF1 PE=3 SV=1	697	273.092	1.17552e-104	84.56	2	230	676	0	440	588
TRINITY_DN6492_c0_g2	1	1409	363	56.42	71.63	sp|Q8BLX4|FUCT1_MOUSE GDP-fucose transporter 1 OS=Mus musculus GN=Slc35c1 PE=2 SV=1	290	116.316	1.72249e-27	29.96	-1	180	974	0	101	360
TRINITY_DN5810_c0_g3	1	1383	1101	98.92	40.96	sp|Q8IY18|SMC5_HUMAN Structural maintenance of chromosomes protein 5 OS=Homo sapiens GN=SMC5 PE=1 SV=2	550	216.468	9.19697e-60	32.68	2	2	1369	0	52	502
TRINITY_DN4119_c0_g1	1	1341	303	55.7	74.26	sp|Q9SCU0|SDR2A_ARATH Short-chain dehydrogenase reductase 2a OS=Arabidopsis thaliana GN=SDR2a PE=3 SV=1	228	92.4337	5.87021e-27	31.76	-3	395	1141	0	3	227
TRINITY_DN4245_c0_g1	1	1325	395	89.43	92.41	sp|Q09689|IF5_SCHPO Probable eukaryotic translation initiation factor 5 OS=Schizosaccharomyces pombe (strain 972 / ATCC 24843) GN=tif5 PE=3 SV=1	789	308.531	7.0092e-99	46.02	2	2	1186	0	10	374
TRINITY_DN7256_c1_g3	1	1287	759	95.34	54.41	sp|P31382|PMT2_YEAST Dolichyl-phosphate-mannose--protein mannosyltransferase 2 OS=Saccharomyces cerevisiae (strain ATCC 204508 / S288c) GN=PMT2 PE=1 SV=2	995	387.882	2.51461e-125	45.91	-1	58	1284	0	341	753
TRINITY_DN2070_c0_g1	1	1224	2376	19.85	3.45	sp|P40468|TAO3_YEAST Cell morphogenesis protein PAG1 OS=Saccharomyces cerevisiae (strain ATCC 204508 / S288c) GN=TAO3 PE=1 SV=1	185	75.8702	2.62525e-13	40.24	1	682	924	0	157	238
TRINITY_DN6571_c1_g1	1	1204	189	33.89	67.2	sp|O74903|YCS3_SCHPO Uncharacterized calcium-binding protein C613.03 OS=Schizosaccharomyces pombe (strain 972 / ATCC 24843) GN=SPCC613.03 PE=3 SV=1	206	83.9593	1.51688e-17	36.76	1	385	792	0	34	160
TRINITY_DN5695_c0_g2	1	1183	785	67.2	33.76	sp|B0D0N9|SEY1_LACBS Protein SEY1 OS=Laccaria bicolor (strain S238N-H82 / ATCC MYA-4686) GN=SEY1 PE=3 SV=1	1182	459.914	9.18911e-158	82.26	-1	245	1039	0	34	298
TRINITY_DN5287_c0_g2	1	1169	926	98.8	41.25	sp|Q9C827|COB22_ARATH Coatomer subunit beta&apos;-2 OS=Arabidopsis thaliana GN=At1g52360 PE=1 SV=1	1198	466.077	2.33059e-154	54.52	1	1	1155	0	137	518
TRINITY_DN6411_c0_g1	1	1161	340	78.55	78.53	sp|Q7KWM9|IUNH_DICDI Inosine-uridine-preferring nucleoside hydrolase homolog OS=Dictyostelium discoideum GN=iunH PE=3 SV=1	326	130.183	1.1395e-32	33.33	1	214	1125	0	32	298
TRINITY_DN6811_c0_g2	1	1148	108	28.22	100	sp|O94746|FKBP_CRYNH FK506-binding protein 1 OS=Cryptococcus neoformans var. grubii serotype A (strain H99 / ATCC 208821 / CBS 10515 / FGSC 9487) GN=FRR1 PE=3 SV=1	428	169.474	7.27396e-50	74.07	2	380	703	0	1	108
TRINITY_DN6504_c0_g1	1	1137	126	21.11	63.49	sp|P62323|SMD3_XENLA Small nuclear ribonucleoprotein Sm D3 OS=Xenopus laevis GN=snrpd3 PE=2 SV=1	318	127.102	1.17825e-33	67.5	2	56	295	0	3	82
TRINITY_DN4218_c0_g1	1	1128	359	21.54	20.61	sp|Q86JB0|Y8324_DICDI Putative uncharacterized protein DDB_G0277003 OS=Dictyostelium discoideum GN=DDB_G0277003 PE=4 SV=2	148	61.6178	3.95217e-09	37.04	-2	42	284	0	141	214
TRINITY_DN9530_c0_g1	1	1107	553	94.31	62.21	sp|Q4R4D5|GLPK2_MACFA Glycerol kinase 2 OS=Macaca fascicularis GN=GK2 PE=2 SV=1	804	314.309	2.90975e-100	47.41	2	2	1045	0	189	532
TRINITY_DN2155_c0_g1	1	1099	229	16.38	27.51	sp|Q9USP6|CLC1_SCHPO Clathrin light chain OS=Schizosaccharomyces pombe (strain 972 / ATCC 24843) GN=clc1 PE=1 SV=1	122	51.6026	2.73519e-10	41.27	3	588	767	0	99	161
TRINITY_DN1704_c0_g2	1	1092	3655	92.86	9.22	sp|Q10064|YAMB_SCHPO Uncharacterized PI3/PI4-kinase family protein C1F5.11c OS=Schizosaccharomyces pombe (strain 972 / ATCC 24843) GN=SPAC1F5.11c PE=3 SV=1	330	131.724	2.36864e-31	26.63	-3	26	1039	0	1001	1337
TRINITY_DN5536_c0_g1	1	1084	220	60.89	100	sp|P0CR54|SNF7_CRYNJ Vacuolar-sorting protein SNF7 OS=Cryptococcus neoformans var. neoformans serotype D (strain JEC21 / ATCC MYA-565) GN=SNF7 PE=3 SV=1	465	183.726	4.60351e-54	62.16	1	241	900	0	1	220
TRINITY_DN8247_c0_g1	1	1071	1304	73.95	20.09	sp|Q99NB9|SF3B1_MOUSE Splicing factor 3B subunit 1 OS=Mus musculus GN=Sf3b1 PE=1 SV=1	967	377.096	5.87208e-118	65.15	-2	279	1070	0	1043	1304
TRINITY_DN7316_c0_g1	1	1058	1469	54.73	11.57	sp|Q9P7V2|ABC4_SCHPO ATP-binding cassette transporter abc4 OS=Schizosaccharomyces pombe (strain 972 / ATCC 24843) GN=abc4 PE=3 SV=1	261	105.145	5.66743e-23	30.93	-1	66	644	0	369	538
TRINITY_DN6455_c0_g2	1	1048	1480	67.27	15.61	sp|Q4WD47|FMPE_ASPFU Nonribosomal peptide synthetase fmpE OS=Neosartorya fumigata (strain ATCC MYA-4609 / Af293 / CBS 101355 / FGSC A1100) GN=fmpE PE=2 SV=1	210	85.5001	9.49529e-17	31.17	-1	344	1048	0	1192	1422
TRINITY_DN2303_c0_g1	1	1031	213	15.71	24.41	sp|Q9UV33|H1_ASCIM Histone H1 OS=Ascobolus immersus PE=3 SV=1	132	55.4546	9.10167e-08	53.7	-3	586	747	0	44	95
TRINITY_DN2853_c0_g1	1	1013	703	50.94	24.32	sp|Q9Y804|FAN1_SCHPO Fanconi-associated nuclease 1 homolog OS=Schizosaccharomyces pombe (strain 972 / ATCC 24843) GN=SPBC146.06c PE=1 SV=1	413	163.696	1.36436e-43	45.35	-2	287	802	0	527	697
TRINITY_DN5486_c0_g1	1	1002	464	51.5	29.31	sp|Q9P3U1|YKX5_SCHPO Uncharacterized RNA-binding protein C328.05 OS=Schizosaccharomyces pombe (strain 972 / ATCC 24843) GN=SPAC328.05 PE=4 SV=3	300	120.168	4.361e-29	39.53	-1	1	516	0	101	236
TRINITY_DN8491_c0_g3	1	995	556	47.64	28.24	sp|O44400|F37C4_CAEEL Protein F37C4.5 OS=Caenorhabditis elegans GN=F37C4.5 PE=1 SV=3	174	71.633	2.01211e-12	29.19	-2	293	766	0	339	495
TRINITY_DN4983_c0_g4	1	976	1553	90.37	18.35	sp|A0A0U1LQE1|CCTS_TALIS ABC transporter cctS OS=Talaromyces islandicus GN=cctS PE=3 SV=1	288	115.546	1.86933e-26	29.74	-1	65	946	0	781	1065
TRINITY_DN6865_c0_g2	1	960	565	87.5	45.66	sp|Q5BA81|EASD_EMENI Acyl-CoA ligase easD OS=Emericella nidulans (strain FGSC A4 / ATCC 38163 / CBS 112.46 / NRRL 194 / M139) GN=easD PE=3 SV=1	194	79.337	4.74916e-15	26.32	-1	7	846	0	15	272
TRINITY_DN2272_c0_g1	1	955	495	64.71	41.62	sp|Q6UEF1|AFLY_ASPPU Oxidoreductase AflY OS=Aspergillus parasiticus (strain ATCC 56775 / NRRL 5862 / SRRC 143 / SU-1) GN=aflY PE=3 SV=1	232	93.9745	4.57769e-20	31.34	-3	201	818	0	45	250
TRINITY_DN5384_c0_g1	1	949	137	22.13	51.09	sp|O74533|QCR7_SCHPO Cytochrome b-c1 complex subunit 7 OS=Schizosaccharomyces pombe (strain 972 / ATCC 24843) GN=qcr7 PE=3 SV=1	190	77.7962	4.08028e-16	51.43	-1	341	550	0	53	122
TRINITY_DN5114_c0_g2	1	929	561	85.58	40.46	sp|P40970|LCB2_YEAST Serine palmitoyltransferase 2 OS=Saccharomyces cerevisiae (strain ATCC 204508 / S288c) GN=LCB2 PE=1 SV=1	585	229.95	1.20823e-68	47.6	3	3	797	0	328	554
TRINITY_DN3783_c0_g2	1	923	480	47.45	30.42	sp|Q1KKV8|MFSD5_TAKRU Molybdate-anion transporter OS=Takifugu rubripes GN=mfsd5 PE=3 SV=1	280	112.464	1.48066e-26	40.82	-3	184	621	0	48	193
TRINITY_DN8889_c1_g4	1	911	320	28.65	24.06	sp|Q9UTN1|OAC1_SCHPO Mitochondrial oxaloacetate transport protein OS=Schizosaccharomyces pombe (strain 972 / ATCC 24843) GN=oac1 PE=3 SV=1	159	65.855	5.60608e-11	42.53	-3	625	885	0	240	316
TRINITY_DN6355_c0_g2	1	891	439	87.54	55.35	sp|P48601|PRS4_DROME 26S proteasome regulatory subunit 4 OS=Drosophila melanogaster GN=Rpt2 PE=1 SV=2	1107	431.024	2.35389e-148	81.92	-3	110	889	0	197	439
TRINITY_DN3563_c0_g1	1	885	473	62.71	43.13	sp|A7UX13|EGT2_NEUCR Hercynylcysteine sulfoxide lyase OS=Neurospora crassa (strain ATCC 24698 / 74-OR23-1A / CBS 708.71 / DSM 1257 / FGSC 987) GN=egt-2 PE=1 SV=1	291	116.701	3.20323e-28	35.56	3	3	557	0	244	447
TRINITY_DN4477_c0_g1	1	874	494	32.61	17.41	sp|Q0IIF7|UBP14_BOVIN Ubiquitin carboxyl-terminal hydrolase 14 OS=Bos taurus GN=USP14 PE=2 SV=3	143	59.6918	1.00144e-08	36.84	1	550	834	0	108	193
TRINITY_DN4118_c0_g1	1	870	430	34.14	19.07	sp|Q9URW6|YIE2_SCHPO SH3 domain-containing protein PJ696.02 OS=Schizosaccharomyces pombe (strain 972 / ATCC 24843) GN=SPAPJ696.02 PE=1 SV=1	163	67.3958	2.26507e-13	48	1	574	870	0	24	105
TRINITY_DN6197_c0_g1	1	850	588	63.53	28.91	sp|Q28DB0|TT39B_XENTR Tetratricopeptide repeat protein 39B OS=Xenopus tropicalis GN=ttc39b PE=2 SV=1	234	94.7449	2.39294e-20	30.98	-2	148	687	0	193	362
TRINITY_DN5309_c0_g1	1	843	298	64.77	62.75	sp|Q4ADK4|CFDP1_MUNRE Craniofacial development protein 1 OS=Muntiacus reevesi GN=CFDP1 PE=2 SV=1	132	55.4546	1.48026e-07	28.99	-1	85	630	0	101	287
TRINITY_DN9836_c0_g1	1	838	1328	76.25	16.19	sp|P10978|POLX_TOBAC Retrovirus-related Pol polyprotein from transposon TNT 1-94 OS=Nicotiana tabacum PE=2 SV=1	427	169.088	4.19049e-45	41.67	-2	184	822	0	1111	1325
TRINITY_DN5326_c0_g1	1	831	181	44.04	65.75	sp|O59821|CSL4_SCHPO Exosome complex component csl4 OS=Schizosaccharomyces pombe (strain 972 / ATCC 24843) GN=csl4 PE=3 SV=2	193	78.9518	1.69341e-16	43.2	3	60	425	0	5	123
TRINITY_DN2559_c0_g1	1	792	163	46.21	71.17	sp|P64798|Y1315_MYCBO Uncharacterized protein Mb1315 OS=Mycobacterium bovis (strain ATCC BAA-935 / AF2122/97) GN=BQ2027_MB1315 PE=4 SV=1	229	92.8189	3.48574e-27	40	-3	110	475	0	46	161
TRINITY_DN3707_c0_g1	1	773	719	89.65	29.07	sp|Q96WJ0|ERG7_PNECA Lanosterol synthase OS=Pneumocystis carinii GN=ERG7 PE=2 SV=1	554	218.009	7.158e-64	47.62	-2	8	700	0	9	217
TRINITY_DN4280_c0_g1	1	768	164	58.59	71.34	sp|P0CM00|SDHF3_CRYNJ Succinate dehydrogenase assembly factor 3, mitochondrial OS=Cryptococcus neoformans var. neoformans serotype D (strain JEC21 / ATCC MYA-565) GN=CNB04080 PE=3 SV=1	153	63.5438	2.69003e-16	36.48	-1	199	648	0	1	117
TRINITY_DN1729_c0_g1	1	764	340	29.84	23.53	sp|Q12524|PCD1_YEAST Peroxisomal coenzyme A diphosphatase 1, peroxisomal OS=Saccharomyces cerevisiae (strain ATCC 204508 / S288c) GN=PCD1 PE=1 SV=1	185	75.8702	9.71765e-15	46.25	-2	287	514	0	11	90
TRINITY_DN8980_c0_g2	1	733	817	13.1	3.92	sp|Q4P3X7|BRE1_USTMA E3 ubiquitin-protein ligase BRE1 OS=Ustilago maydis (strain 521 / FGSC 9021) GN=BRE1 PE=3 SV=1	126	53.1434	1.92869e-10	59.38	2	638	733	0	783	814
TRINITY_DN6850_c0_g2	1	716	55	17.6	76.36	sp|O74394|RM39_SCHPO 54S ribosomal protein L39, mitochondrial OS=Schizosaccharomyces pombe (strain 972 / ATCC 24843) GN=mrpl39 PE=3 SV=1	115	48.9062	1.15266e-06	52.38	-3	586	711	0	10	51
TRINITY_DN8864_c0_g1	1	704	400	47.73	27.75	sp|Q9Y8H5|FAD12_MORAP Delta(12) fatty acid desaturase OS=Mortierella alpina PE=1 SV=2	327	130.568	7.00558e-34	54.46	1	283	618	0	290	400
TRINITY_DN7668_c0_g2	1	695	559	75.11	30.05	sp|Q01772|GLOX_PHACH Aldehyde oxidase GLOX OS=Phanerochaete chrysosporium GN=GLX PE=1 SV=1	387	153.68	1.20169e-41	45.4	-3	4	525	0	188	355
TRINITY_DN7879_c3_g12	1	683	579	71.16	27.12	sp|Q9P6J3|MALT_SCHPO Alpha-glucosidase OS=Schizosaccharomyces pombe (strain 972 / ATCC 24843) GN=mal1 PE=2 SV=1	359	142.895	3.39471e-42	43.21	1	190	675	0	255	411
TRINITY_DN7061_c0_g3	1	666	434	79.28	39.86	sp|A8NEG8|LIS1_COPC7 Nuclear distribution protein PAC1 OS=Coprinopsis cinerea (strain Okayama-7 / 130 / ATCC MYA-4618 / FGSC 9003) GN=PAC1 PE=3 SV=3	478	188.734	1.82206e-55	54.75	1	124	651	0	4	176
TRINITY_DN10575_c0_g1	1	658	739	42.86	12.86	sp|A2QBQ3|EGLX_ASPNC Probable endo-1,3(4)-beta-glucanase An02g00850 OS=Aspergillus niger (strain CBS 513.88 / FGSC A1513) GN=An02g00850 PE=3 SV=1	165	68.1662	5.95666e-12	42.11	1	367	648	0	11	105
TRINITY_DN3682_c0_g1	1	640	327	47.81	30.89	sp|O35459|ECH1_MOUSE Delta(3,5)-Delta(2,4)-dienoyl-CoA isomerase, mitochondrial OS=Mus musculus GN=Ech1 PE=1 SV=1	238	96.2857	3.70156e-22	50.98	1	64	369	0	185	285
TRINITY_DN2277_c0_g1	1	636	811	65.09	17.26	sp|O13705|SEC10_SCHPO Exocyst complex component sec10 OS=Schizosaccharomyces pombe (strain 972 / ATCC 24843) GN=sec10 PE=1 SV=2	254	102.449	2.42144e-23	36.43	1	1	414	0	196	335
TRINITY_DN6699_c0_g2	1	627	94	26.32	50	sp|Q9UT86|APC11_SCHPO Anaphase-promoting complex subunit 11 OS=Schizosaccharomyces pombe (strain 972 / ATCC 24843) GN=apc11 PE=1 SV=1	162	67.0106	2.7477e-21	56.36	3	168	332	0	1	47
TRINITY_DN5505_c0_g4	1	612	514	56.37	22.37	sp|P38776|YHK8_YEAST Probable drug/proton antiporter YHK8 OS=Saccharomyces cerevisiae (strain ATCC 204508 / S288c) GN=YHK8 PE=1 SV=1	260	104.76	1.10916e-24	52.17	1	1	345	0	397	511
TRINITY_DN7346_c0_g2	1	608	367	58.72	31.61	sp|O43120|UAP2_SCHPO Splicing factor U2AF-associated protein 2 OS=Schizosaccharomyces pombe (strain 972 / ATCC 24843) GN=uap2 PE=1 SV=1	230	93.2041	3.85326e-21	50.42	1	211	567	0	248	363
TRINITY_DN3305_c0_g1	1	605	107	52.56	99.07	sp|P00049|CYC_USTSP Cytochrome c OS=Ustilago sphaerogena PE=1 SV=1	430	170.244	2.2436e-52	75.47	-3	193	510	0	2	107
TRINITY_DN4382_c0_g3	1	597	951	54.27	11.36	sp|Q8R3B7|BRD8_MOUSE Bromodomain-containing protein 8 OS=Mus musculus GN=Brd8 PE=1 SV=2	226	91.6633	1.22029e-19	42.59	1	211	534	0	781	888
TRINITY_DN4006_c0_g2	1	594	1285	92.93	14.01	sp|Q9UTJ8|RAD50_SCHPO DNA repair protein rad50 OS=Schizosaccharomyces pombe (strain 972 / ATCC 24843) GN=rad50 PE=1 SV=3	578	227.254	1.11044e-66	58.38	2	38	589	0	1	180
TRINITY_DN10057_c0_g1	1	583	1356	61.23	9.73	sp|Q00808|HETE1_PODAS Vegetative incompatibility protein HET-E-1 OS=Podospora anserina GN=HET-E1 PE=4 SV=1	184	75.485	2.91467e-14	35.29	2	197	553	0	26	157
TRINITY_DN310_c0_g1	1	571	328	95.62	55.49	sp|Q9I4V0|2NPD_PSEAE Nitronate monooxygenase OS=Pseudomonas aeruginosa (strain ATCC 15692 / DSM 22644 / CIP 104116 / JCM 14847 / LMG 12228 / 1C / PRS 101 / PAO1) GN=PA1024 PE=1 SV=1	520	204.912	2.69942e-63	58.79	-3	6	551	0	6	187
TRINITY_DN3440_c0_g1	1	533	439	66.42	26.42	sp|Q9Y700|EFTU_SCHPO Elongation factor Tu, mitochondrial OS=Schizosaccharomyces pombe (strain 972 / ATCC 24843) GN=tuf1 PE=3 SV=1	379	150.599	2.79786e-45	56.78	-2	11	364	0	313	428
TRINITY_DN5287_c0_g1	1	530	909	99.62	19.03	sp|Q8L828|COB23_ARATH Coatomer subunit beta&apos;-3 OS=Arabidopsis thaliana GN=At3g15980 PE=2 SV=1	388	154.066	1.14081e-41	51.7	-3	1	528	0	548	720
TRINITY_DN5776_c0_g1	1	527	877	97.34	19.61	sp|O74377|SULH1_SCHPO Probable sulfate permease C3H7.02 OS=Schizosaccharomyces pombe (strain 972 / ATCC 24843) GN=SPBC3H7.02 PE=3 SV=1	355	141.354	2.72134e-37	49.14	-2	14	526	0	485	656
TRINITY_DN7293_c0_g4	1	521	337	69.1	35.31	sp|P67963|KC1A_XENLA Casein kinase I isoform alpha OS=Xenopus laevis GN=csnk1a1 PE=2 SV=1	234	94.7449	1.66133e-24	41.67	-2	146	505	0	5	123
TRINITY_DN7559_c0_g1	1	518	433	84.56	33.95	sp|Q12463|TRM11_YEAST tRNA (guanine(10)-N2)-methyltransferase OS=Saccharomyces cerevisiae (strain ATCC 204508 / S288c) GN=TRM11 PE=1 SV=1	242	97.8265	7.23905e-23	36	-1	51	488	0	3	149
TRINITY_DN3953_c0_g2	1	515	881	78.64	14.76	sp|P0CS38|HIR1_CRYNJ Protein HIR1 OS=Cryptococcus neoformans var. neoformans serotype D (strain JEC21 / ATCC MYA-565) GN=HIR1 PE=3 SV=1	409	162.155	1.13277e-44	57.04	3	108	512	0	1	130
TRINITY_DN2765_c0_g1	1	510	623	85.29	23.43	sp|A6RCT2|LKHA4_AJECN Leukotriene A-4 hydrolase homolog OS=Ajellomyces capsulatus (strain NAm1 / WU24) GN=HCAG_07440 PE=3 SV=2	319	127.487	6.95415e-33	41.78	-1	4	438	0	16	161
TRINITY_DN9477_c0_g1	1	504	448	41.07	15.4	sp|A1C5D3|AGALB_ASPCL Probable alpha-galactosidase B OS=Aspergillus clavatus (strain ATCC 1007 / CBS 513.65 / DSM 816 / NCTC 3887 / NRRL 1) GN=aglB PE=3 SV=1	199	81.2629	1.09375e-26	50.72	1	1	207	0	240	308
TRINITY_DN1951_c0_g1	1	501	1527	56.29	4.65	sp|Q7Y1I7|DNM1A_ORYSJ DNA (cytosine-5)-methyltransferase 1A OS=Oryza sativa subsp. japonica GN=MET1A PE=2 SV=1	144	60.077	1.75379e-09	36.17	-1	196	477	0	1433	1503
TRINITY_DN2659_c0_g1	1	491	716	95.93	24.16	sp|Q6BLJ9|CBK1_DEBHA Serine/threonine-protein kinase CBK1 OS=Debaryomyces hansenii (strain ATCC 36239 / CBS 767 / JCM 1990 / NBRC 0083 / IGC 2968) GN=CBK1 PE=3 SV=2	609	239.195	2.8019e-73	61.49	3	3	473	0	535	707
TRINITY_DN2245_c0_g1	1	480	212	56.25	42.45	sp|Q8K3J1|NDUS8_MOUSE NADH dehydrogenase [ubiquinone] iron-sulfur protein 8, mitochondrial OS=Mus musculus GN=Ndufs8 PE=1 SV=1	394	156.377	3.09274e-46	81.11	2	2	271	0	123	212
TRINITY_DN1102_c0_g1	1	461	1142	67.68	9.02	sp|P38990|SAK1_YEAST SNF1-activating kinase 1 OS=Saccharomyces cerevisiae (strain ATCC 204508 / S288c) GN=SAK1 PE=1 SV=1	121	51.2174	8.67215e-07	32.11	2	134	445	0	111	213
TRINITY_DN1173_c0_g1	1	438	366	50	18.85	sp|Q1PSI9|IDND_VITVI L-idonate 5-dehydrogenase OS=Vitis vinifera GN=VIT_16s0100g00290 PE=1 SV=2	172	70.8626	1.02464e-13	46.58	2	107	325	0	112	180
TRINITY_DN5398_c0_g1	1	409	815	41.81	7.24	sp|Q2U325|BGLG_ASPOR Probable beta-glucosidase G OS=Aspergillus oryzae (strain ATCC 42149 / RIB 40) GN=bglG PE=3 SV=1	162	67.0106	5.11674e-12	52.54	-3	234	404	0	731	789
TRINITY_DN5343_c0_g4	1	398	536	47.49	11.94	sp|Q4WAZ6|FMAG_ASPFU Multifunctional cytochrome P450 monooxygenase af510 OS=Neosartorya fumigata (strain ATCC MYA-4609 / Af293 / CBS 101355 / FGSC A1100) GN=af510 PE=1 SV=1	154	63.929	3.16934e-11	48.44	2	89	277	0	317	380
TRINITY_DN9344_c1_g3	1	395	967	72.15	9.82	sp|O14111|PSD3_SCHPO Phosphatidylserine decarboxylase proenzyme 3 OS=Schizosaccharomyces pombe (strain 972 / ATCC 24843) GN=psd3 PE=3 SV=2	300	120.168	2.37202e-30	57.89	-1	102	386	0	854	948
TRINITY_DN3964_c0_g1	1	390	663	99.23	19.61	sp|Q3TX08|TRM1_MOUSE tRNA (guanine(26)-N(2))-dimethyltransferase OS=Mus musculus GN=Trmt1 PE=1 SV=2	296	118.627	3.65972e-30	46.15	-3	2	388	0	396	525
TRINITY_DN1477_c0_g3	1	368	361	52.17	18.01	sp|Q9P6L7|YKQ9_SCHPO Uncharacterized mitochondrial carrier C688.09 OS=Schizosaccharomyces pombe (strain 972 / ATCC 24843) GN=SPAC688.09 PE=3 SV=1	194	79.337	5.34685e-17	56.92	-3	175	366	0	295	359
TRINITY_DN6282_c0_g3	1	349	576	86.82	17.19	sp|D8Q9M3|AMYG_SCHCM Glucoamylase ARB_02327-1 OS=Schizophyllum commune (strain H4-8 / FGSC 9210) GN=SCHCODRAFT_57589 PE=1 SV=1	336	134.035	2.5595e-36	61.39	3	45	347	0	147	245
TRINITY_DN8444_c0_g3	1	341	422	43.11	11.61	sp|Q29RZ0|THIL_BOVIN Acetyl-CoA acetyltransferase, mitochondrial OS=Bos taurus GN=ACAT1 PE=2 SV=1	114	48.521	2.50816e-06	73.47	3	3	149	0	374	422
TRINITY_DN5727_c0_g1	1	336	298	40.18	15.1	sp|Q9P3T7|ODC_SCHPO Probable mitochondrial 2-oxodicarboxylate carrier OS=Schizosaccharomyces pombe (strain 972 / ATCC 24843) GN=SPAC328.09 PE=3 SV=1	172	70.8626	2.2896e-14	73.33	1	1	135	0	222	266
TRINITY_DN3525_c0_g1	1	288	663	94.79	13.88	sp|Q00922|ALOX_CANBO Alcohol oxidase OS=Candida boidinii GN=AOD1 PE=1 SV=1	180	73.9442	6.57317e-15	41.94	-2	15	287	0	264	355
TRINITY_DN3677_c0_g2	1	283	1719	99.65	5.47	sp|P97789|XRN1_MOUSE 5&apos;-3&apos; exoribonuclease 1 OS=Mus musculus GN=Xrn1 PE=1 SV=1	322	128.642	1.18216e-33	70.21	-2	1	282	0	43	136
TRINITY_DN3127_c0_g1	1	265	927	92.83	9.17	sp|Q6P286|DHTK1_XENLA Probable 2-oxoglutarate dehydrogenase E1 component DHKTD1, mitochondrial OS=Xenopus laevis GN=dhtkd1 PE=2 SV=1	245	98.9821	1.06314e-23	52.94	-2	1	246	0	282	366
TRINITY_DN7000_c0_g2	1	257	697	99.22	12.05	sp|O13773|UCP7_SCHPO UBA domain-containing protein 7 OS=Schizosaccharomyces pombe (strain 972 / ATCC 24843) GN=ucp7 PE=4 SV=1	213	86.6557	1.40008e-19	47.06	3	3	257	0	589	672
TRINITY_DN2103_c0_g1	1	250	808	70.8	7.55	sp|O14255|GCS1_SCHPO Probable mannosyl-oligosaccharide glucosidase OS=Schizosaccharomyces pombe (strain 972 / ATCC 24843) GN=SPAC6G10.09 PE=3 SV=1	158	65.4698	4.2181e-12	47.54	-2	49	225	0	21	81
TRINITY_DN264_c0_g1	1	234	1025	51.28	3.9	sp|A8N936|DNLI4_COPC7 DNA ligase 4 OS=Coprinopsis cinerea (strain Okayama-7 / 130 / ATCC MYA-4618 / FGSC 9003) GN=LIG4 PE=3 SV=2	148	61.6178	7.49278e-11	67.5	-1	4	123	0	29	68
TRINITY_DN10266_c0_g1	1	226	686	73.01	8.02	sp|P40485|SLM1_YEAST Phosphatidylinositol 4,5-bisphosphate-binding protein SLM1 OS=Saccharomyces cerevisiae (strain ATCC 204508 / S288c) GN=SLM1 PE=1 SV=1	113	48.1358	2.00274e-06	34.55	1	58	222	0	181	235
TRINITY_DN5635_c0_g4	1	203	902	57.64	4.32	sp|P06738|PHSG_YEAST Glycogen phosphorylase OS=Saccharomyces cerevisiae (strain ATCC 204508 / S288c) GN=GPH1 PE=1 SV=4	167	68.9366	1.41541e-13	74.36	1	82	198	0	509	547
TRINITY_DN9046_c0_g1	1	8215	656	11.54	51.68	sp|Q01408|UVE1_NEUCR UV-damage endonuclease OS=Neurospora crassa (strain ATCC 24698 / 74-OR23-1A / CBS 708.71 / DSM 1257 / FGSC 987) GN=mus-18 PE=2 SV=2	718	281.182	3.00046e-78	46.96	-3	5670	6617	0	204	542
TRINITY_DN9302_c1_g1	1	5698	1102	19.85	33.85	sp|O60184|CYC8_SCHPO General transcriptional corepressor ssn6 OS=Schizosaccharomyces pombe (strain 972 / ATCC 24843) GN=ssn6 PE=1 SV=1	1443	560.451	6.84885e-172	70.03	1	310	1440	0	325	697
TRINITY_DN8018_c1_g1	1	5262	1654	6.33	6.65	sp|Q4P209|EAF11_USTMA Chromatin modification-related protein EAF1 OS=Ustilago maydis (strain 521 / FGSC 9021) GN=EAF1 PE=3 SV=1	334	133.265	1.14032e-29	51.35	1	2278	2610	0	478	587
TRINITY_DN9353_c1_g1	1	5083	529	3.78	13.61	sp|B8MYS7|MF127_ASPFN MFS glucose transporter mfs1 OS=Aspergillus flavus (strain ATCC 200026 / FGSC A1120 / NRRL 3357 / JCM 12722 / SRRC 167) GN=mfs1 PE=2 SV=1	172	70.8626	1.01495e-42	48.61	-3	3138	3329	0	145	216
TRINITY_DN9119_c0_g1	1	4891	499	12.27	38.48	sp|D4AY62|A1131_ARTBC Cytochrome P450 ARB_01131 OS=Arthroderma benhamiae (strain ATCC MYA-4681 / CBS 112371) GN=ARB_01131 PE=3 SV=1	276	110.923	1.11115e-23	35.27	-3	219	818	0	276	467
TRINITY_DN9195_c0_g1	1	4705	414	10.84	43.48	sp|Q00771|KCC1A_EMENI Calcium/calmodulin-dependent protein kinase cmkA OS=Emericella nidulans (strain FGSC A4 / ATCC 38163 / CBS 112.46 / NRRL 194 / M139) GN=cmkA PE=1 SV=2	561	220.705	1.55661e-79	59.44	1	2878	3387	0	35	214
TRINITY_DN8167_c0_g1	1	4427	1176	30.83	37.5	sp|Q12649|HMDH_PHYB8 3-hydroxy-3-methylglutaryl-coenzyme A reductase OS=Phycomyces blakesleeanus (strain ATCC 8743b / DSM 1359 / FGSC 10004 / NBRC 33097 / NRRL 1555) GN=hmgA PE=3 SV=2	1431	555.829	2.03804e-172	64.62	2	2723	4087	0	726	1166
TRINITY_DN9226_c1_g1	1	4324	526	33.58	87.64	sp|P51870|CP4F5_RAT Cytochrome P450 4F5 OS=Rattus norvegicus GN=Cyp4f5 PE=2 SV=1	391	155.221	7.61911e-38	27.09	-2	2494	3945	0	48	508
TRINITY_DN8759_c0_g1	1	4231	970	17.37	23.09	sp|P37202|DIS3_SCHPO Exosome complex exonuclease dis3 OS=Schizosaccharomyces pombe (strain 972 / ATCC 24843) GN=dis3 PE=1 SV=1	326	130.183	4.24214e-54	34.14	-2	3289	4023	0	33	256
TRINITY_DN8752_c0_g1	1	4159	924	61.38	93.29	sp|D4AUF1|WSCD1_ARTBC WSC domain-containing protein ARB_07867 OS=Arthroderma benhamiae (strain ATCC MYA-4681 / CBS 112371) GN=ARB_07867 PE=1 SV=1	2222	860.522	0	52.3	-2	1	2553	0	63	924
TRINITY_DN6702_c0_g2	1	4080	712	13.6	27.25	sp|Q8BKR5|PPR37_MOUSE Protein phosphatase 1 regulatory subunit 37 OS=Mus musculus GN=Ppp1r37 PE=1 SV=1	256	103.219	5.56969e-21	36.55	3	2067	2621	0	283	476
TRINITY_DN8753_c0_g2	1	4002	310	16.12	60	sp|Q8JZZ6|AMERL_MOUSE AMMECR1-like protein OS=Mus musculus GN=Ammecr1l PE=1 SV=1	428	169.474	3.24848e-44	43.98	-1	1930	2574	0	107	292
TRINITY_DN3989_c0_g1	1	3854	468	32.93	89.1	sp|G3XMC9|AZAK_ASPNA Efflux pump azaK OS=Aspergillus niger (strain ATCC 1015 / CBS 113.46 / FGSC A1144 / LSHB Ac4 / NCTC 3858a / NRRL 328 / USDA 3528.7) GN=azaK PE=2 SV=1	449	177.563	1.249e-45	29.82	-2	2318	3586	0	9	425
TRINITY_DN8467_c0_g1	1	3634	343	25.18	70.55	sp|Q82V20|OBG_NITEU GTPase Obg OS=Nitrosomonas europaea (strain ATCC 19718 / CIP 103999 / KCTC 2705 / NBRC 14298) GN=obg PE=3 SV=1	314	125.561	3.74053e-29	30.77	-3	1872	2786	0	84	325
TRINITY_DN8949_c0_g2	1	3568	1328	49.44	43.15	sp|P40383|XRN1_SCHPO 5&apos;-3&apos; exoribonuclease 1 OS=Schizosaccharomyces pombe (strain 972 / ATCC 24843) GN=exo2 PE=1 SV=1	1271	494.197	8.81058e-165	43.46	1	538	2301	0	467	1039
TRINITY_DN534_c0_g1	1	3509	791	31.38	44.12	sp|Q76C99|RF1_ORYSI Protein Rf1, mitochondrial OS=Oryza sativa subsp. indica GN=Rf1 PE=2 SV=1	299	119.783	3.89765e-26	24.93	-3	1369	2469	0	197	545
TRINITY_DN7532_c0_g1	1	3468	442	19.64	45.48	sp|Q9Y7I8|ZUO1_SCHPO Zuotin OS=Schizosaccharomyces pombe (strain 972 / ATCC 24843) GN=zuo1 PE=1 SV=2	592	232.646	4.2775e-65	53.3	-2	2475	3155	0	85	285
TRINITY_DN8075_c0_g1	1	3339	1117	88.59	87.74	sp|O14232|MTR4_SCHPO ATP-dependent RNA helicase mtr4 OS=Schizosaccharomyces pombe (strain 972 / ATCC 24843) GN=mtr4 PE=1 SV=1	3046	1177.93	0	63.1	-1	130	3087	0	128	1107
TRINITY_DN4166_c0_g1	1	3295	466	24.13	59.66	sp|Q6U1Z4|CMT1_CRYNJ Alpha-1,3-mannosyltransferase CMT1 OS=Cryptococcus neoformans var. neoformans serotype D (strain JEC21 / ATCC MYA-565) GN=CMT1 PE=1 SV=1	401	159.073	1.09225e-39	36.17	2	758	1552	0	128	405
TRINITY_DN8923_c0_g6	1	3171	424	15.52	38.92	sp|O13716|AGN1_SCHPO Glucan endo-1,3-alpha-glucosidase agn1 OS=Schizosaccharomyces pombe (strain 972 / ATCC 24843) GN=agn1 PE=1 SV=2	274	110.153	5.52138e-24	39.41	-3	2	493	0	19	183
TRINITY_DN8512_c0_g1	1	3131	488	17.06	36.07	sp|P0CM48|PALC_CRYNJ pH-response regulator protein palC OS=Cryptococcus neoformans var. neoformans serotype D (strain JEC21 / ATCC MYA-565) GN=CNE03350 PE=3 SV=1	218	88.5817	7.71486e-17	36.32	-2	1607	2140	0	313	488
TRINITY_DN6321_c0_g1	1	3094	957	58.27	60.29	sp|Q1MTN7|RPM1_SCHPO Exoribonuclease II, mitochondrial OS=Schizosaccharomyces pombe (strain 972 / ATCC 24843) GN=rpm1 PE=2 SV=2	415	164.466	5.84268e-40	25.45	-2	319	2121	0	310	886
TRINITY_DN8916_c0_g1	1	3019	456	16.89	37.06	sp|D4ANW6|PHYA_ARTBC 3-phytase A OS=Arthroderma benhamiae (strain ATCC MYA-4681 / CBS 112371) GN=ARB_05933 PE=1 SV=1	149	62.003	1.38986e-20	24	3	540	1049	0	145	313
TRINITY_DN8075_c1_g1	1	2948	198	20.05	99.49	sp|P87027|SPG1_SCHPO Septum-promoting GTP-binding protein 1 OS=Schizosaccharomyces pombe (strain 972 / ATCC 24843) GN=spg1 PE=1 SV=1	872	340.502	3.41753e-108	80.2	-1	2007	2597	0	1	197
TRINITY_DN7082_c0_g1	1	2885	718	40.24	53.62	sp|Q5KPJ5|ILVB_CRYNJ Acetolactate synthase, mitochondrial OS=Cryptococcus neoformans var. neoformans serotype D (strain JEC21 / ATCC MYA-565) GN=ILV2 PE=3 SV=1	713	279.256	1.98602e-94	41.31	3	1431	2591	0	122	506
TRINITY_DN4336_c0_g1	1	2727	851	51.6	56.05	sp|Q10327|YD72_SCHPO Uncharacterized protein C32A11.02c OS=Schizosaccharomyces pombe (strain 972 / ATCC 24843) GN=SPAC32A11.02c PE=4 SV=1	488	192.586	1.48716e-49	27.96	-1	136	1542	0	234	710
TRINITY_DN7024_c1_g1	1	2667	327	34.31	76.15	sp|O74777|KRR1_SCHPO KRR1 small subunit processome component homolog OS=Schizosaccharomyces pombe (strain 972 / ATCC 24843) GN=mis3 PE=3 SV=1	909	354.755	1.78944e-112	60.52	-3	1499	2413	0	34	282
TRINITY_DN4004_c0_g1	1	2644	1124	87.25	69.75	sp|Q9EPU0|RENT1_MOUSE Regulator of nonsense transcripts 1 OS=Mus musculus GN=Upf1 PE=1 SV=2	3119	1206.05	0	71.68	-3	3	2309	0	104	887
TRINITY_DN1933_c0_g2	1	2549	974	19.89	15.2	sp|Q9FIT7|PP442_ARATH Pentatricopeptide repeat-containing protein At5g61990, mitochondrial OS=Arabidopsis thaliana GN=At5g61990 PE=2 SV=1	151	62.7734	1.39595e-08	30.18	1	706	1212	0	576	723
TRINITY_DN8451_c0_g1	1	2480	346	43.31	99.71	sp|O34788|BDHA_BACSU (R,R)-butanediol dehydrogenase OS=Bacillus subtilis (strain 168) GN=bdhA PE=3 SV=1	552	217.238	1.32053e-61	40.5	1	1378	2451	0	1	345
TRINITY_DN9134_c1_g3	1	2462	589	23.88	32.09	sp|Q3BTC8|MSBA_XANC5 Lipid A export ATP-binding/permease protein MsbA OS=Xanthomonas campestris pv. vesicatoria (strain 85-10) GN=msbA PE=3 SV=1	286	114.775	3.58778e-25	35.71	-3	697	1284	0	290	478
TRINITY_DN7306_c0_g1	1	2404	715	55.41	53.71	sp|Q5I0C3|MCCA_RAT Methylcrotonoyl-CoA carboxylase subunit alpha, mitochondrial OS=Rattus norvegicus GN=Mccc1 PE=1 SV=1	567	223.016	1.56106e-60	35.78	2	2	1333	0	332	715
TRINITY_DN8617_c0_g1	1	2384	260	5.41	16.54	sp|Q2KI19|GPT11_BOVIN G patch domain-containing protein 11 OS=Bos taurus GN=GPATCH11 PE=2 SV=2	128	53.9138	2.01538e-06	46.51	-1	1911	2039	0	218	260
TRINITY_DN7790_c0_g1	1	2361	394	40.53	73.6	sp|P36421|SYYC_YEAST Tyrosine--tRNA ligase, cytoplasmic OS=Saccharomyces cerevisiae (strain ATCC 204508 / S288c) GN=TYS1 PE=1 SV=3	786	307.375	1.70147e-94	54.06	2	11	967	0	67	356
TRINITY_DN7543_c1_g1	1	2334	622	57.46	70.9	sp|Q502K2|SAMH1_DANRE Deoxynucleoside triphosphate triphosphohydrolase SAMHD1 OS=Danio rerio GN=samhd1 PE=2 SV=2	882	344.354	9.22367e-106	42.64	-1	826	2166	0	94	534
TRINITY_DN2098_c0_g1	1	2312	813	8.43	8	sp|Q7Y0V9|ROC4_ORYSJ Homeobox-leucine zipper protein ROC4 OS=Oryza sativa subsp. japonica GN=ROC4 PE=2 SV=2	144	60.077	6.92703e-08	43.08	2	188	382	0	101	165
TRINITY_DN8132_c0_g1	1	2276	404	13.31	25.74	sp|Q9HB21|PKHA1_HUMAN Pleckstrin homology domain-containing family A member 1 OS=Homo sapiens GN=PLEKHA1 PE=1 SV=2	200	81.6481	5.69327e-15	38.46	-1	1482	1784	0	184	287
TRINITY_DN9031_c1_g1	1	2239	187	21.17	77.54	sp|P90994|DJ11_CAEEL Glutathione-independent glyoxalase DJR-1.1 OS=Caenorhabditis elegans GN=djr-1.1 PE=1 SV=1	268	107.842	1.34443e-27	38.99	-1	1721	2194	0	8	152
TRINITY_DN8034_c3_g1	1	2214	465	71.54	91.83	sp|A4RAE9|AMPP3_MAGO7 Probable Xaa-Pro aminopeptidase PEPP OS=Magnaporthe oryzae (strain 70-15 / ATCC MYA-4617 / FGSC 8958) GN=PEPP PE=3 SV=1	708	277.33	8.15045e-83	36.26	3	543	2126	0	37	463
TRINITY_DN7951_c0_g3	1	2199	281	19.1	35.94	sp|P87219|SOU1_CANAL Sorbose reductase SOU1 OS=Candida albicans (strain SC5314 / ATCC MYA-2876) GN=SOU1 PE=1 SV=1	223	90.5077	8.60015e-31	39.01	1	1669	2088	0	178	278
TRINITY_DN8143_c0_g3	1	2178	1162	84.16	52.58	sp|Q9UTH0|NU132_SCHPO Nucleoporin nup132 OS=Schizosaccharomyces pombe (strain 972 / ATCC 24843) GN=nup132 PE=1 SV=1	289	115.931	3.91033e-25	24.81	-3	335	2167	0	456	1066
TRINITY_DN7809_c0_g1	1	2159	675	9.03	9.63	sp|Q5B778|CCR4_EMENI Glucose-repressible alcohol dehydrogenase transcriptional effector OS=Emericella nidulans (strain FGSC A4 / ATCC 38163 / CBS 112.46 / NRRL 194 / M139) GN=ccr4 PE=3 SV=1	146	60.8474	3.09206e-08	47.69	1	973	1167	0	183	247
TRINITY_DN8118_c0_g1	1	2094	437	29.51	40.5	sp|Q3SWX2|ACOT9_BOVIN Acyl-coenzyme A thioesterase 9, mitochondrial OS=Bos taurus GN=ACOT9 PE=2 SV=1	215	87.4261	9.53072e-37	29.61	-1	430	1047	0	249	425
TRINITY_DN7836_c0_g1	1	2076	596	30.06	35.4	sp|W7LC91|FUM15_GIBM7 Cytochrome P450 monooxygenase FUM15 OS=Gibberella moniliformis (strain M3125 / FGSC 7600) GN=FUM15 PE=3 SV=1	165	68.1662	1.29284e-10	29.36	-3	629	1252	0	65	275
TRINITY_DN7710_c0_g2	1	2060	371	13.69	26.15	sp|Q9NQ29|LUC7L_HUMAN Putative RNA-binding protein Luc7-like 1 OS=Homo sapiens GN=LUC7L PE=1 SV=1	211	85.8853	1.39209e-16	46.94	-2	1742	2023	0	143	239
TRINITY_DN7279_c0_g2	1	2043	612	42	44.12	sp|O88487|DC1I2_MOUSE Cytoplasmic dynein 1 intermediate chain 2 OS=Mus musculus GN=Dync1i2 PE=1 SV=1	847	330.872	8.14981e-102	56.94	1	532	1389	0	265	534
TRINITY_DN3645_c0_g1	1	2027	463	74.44	98.92	sp|Q12702|2ABA_SCHPO Protein phosphatase PP2A regulatory subunit B OS=Schizosaccharomyces pombe (strain 972 / ATCC 24843) GN=pab1 PE=1 SV=2	1371	532.717	0	61.43	-2	476	1984	0	4	461
TRINITY_DN9231_c1_g1	1	1982	740	33.3	27.3	sp|P34422|DPF6_CAEEL Dipeptidyl peptidase family member 6 OS=Caenorhabditis elegans GN=dpf-6 PE=3 SV=2	183	75.0998	4.75097e-15	26.87	-1	186	845	0	397	598
TRINITY_DN6074_c1_g1	1	1952	241	26.74	72.61	sp|P23724|PSB6_YEAST Proteasome subunit beta type-6 OS=Saccharomyces cerevisiae (strain ATCC 204508 / S288c) GN=PRE7 PE=1 SV=1	534	210.305	2.78157e-61	54.86	-1	1287	1808	0	16	190
TRINITY_DN5010_c0_g1	1	1939	358	18.41	35.47	sp|Q32KQ2|WDR53_BOVIN WD repeat-containing protein 53 OS=Bos taurus GN=WDR53 PE=2 SV=1	153	63.5438	2.03974e-09	27.56	3	354	710	0	95	221
TRINITY_DN10002_c0_g1	1	1906	583	46.12	50.09	sp|P16912|KDC2_DROME Protein kinase DC2 OS=Drosophila melanogaster GN=Pka-C3 PE=2 SV=2	914	356.681	1.50784e-112	55.63	1	463	1341	0	271	562
TRINITY_DN9044_c0_g1	1	1890	346	34.6	56.36	sp|Q9HDZ9|QSPP_SCHPO Queuosine salvage protein OS=Schizosaccharomyces pombe (strain 972 / ATCC 24843) GN=SPAC589.05c PE=3 SV=1	285	114.39	3.17515e-26	35.62	2	1235	1888	0	4	198
TRINITY_DN7982_c0_g1	1	1849	2271	56.3	15.81	sp|O60287|NPA1P_HUMAN Nucleolar pre-ribosomal-associated protein 1 OS=Homo sapiens GN=URB1 PE=1 SV=4	265	106.686	1.96521e-22	24.59	2	191	1231	0	1500	1858
TRINITY_DN8589_c0_g2	1	1787	451	44.66	51	sp|Q26609|HXK_SCHMA Hexokinase OS=Schistosoma mansoni PE=1 SV=2	366	145.591	2.64849e-49	35.77	1	142	939	0	6	235
TRINITY_DN4816_c0_g1	1	1775	556	93.3	99.28	sp|O94501|TCPA_SCHPO T-complex protein 1 subunit alpha OS=Schizosaccharomyces pombe (strain 972 / ATCC 24843) GN=cct1 PE=3 SV=1	2169	840.106	0	73.78	2	41	1696	0	1	552
TRINITY_DN3923_c0_g1	1	1765	836	99.26	60.17	sp|O74552|VPS35_SCHPO Vacuolar protein sorting-associated protein 35 OS=Schizosaccharomyces pombe (strain 972 / ATCC 24843) GN=vps35 PE=1 SV=2	784	306.605	1.08429e-91	33.84	-3	6	1757	0	70	572
TRINITY_DN6105_c0_g2	1	1729	2142	60.56	16.25	sp|Q9VUV9|U520_DROME Putative U5 small nuclear ribonucleoprotein 200 kDa helicase OS=Drosophila melanogaster GN=l(3)72Ab PE=2 SV=4	1028	400.593	0	52.15	1	1	1047	0	1403	1750
TRINITY_DN8346_c0_g3	1	1720	1196	69.59	32.61	sp|Q08972|NEW1_YEAST [NU+] prion formation protein 1 OS=Saccharomyces cerevisiae (strain ATCC 204508 / S288c) GN=NEW1 PE=1 SV=1	481	189.889	1.19496e-90	37.59	2	2	1198	0	324	713
TRINITY_DN6091_c0_g1	1	1707	377	12.13	16.18	sp|Q00012|MANA_ASPAC Mannan endo-1,4-beta-mannosidase A OS=Aspergillus aculeatus GN=manA PE=1 SV=1	148	61.6178	6.86207e-20	44.29	-2	1500	1706	0	88	148
TRINITY_DN7833_c0_g2	1	1616	386	54.21	73.06	sp|Q4QRK0|MAP11_DANRE Methionine aminopeptidase 1 OS=Danio rerio GN=metap1 PE=2 SV=2	770	301.212	7.25117e-95	51.66	2	29	904	0	47	328
TRINITY_DN7708_c0_g2	1	1587	516	43.67	43.99	sp|O74829|YN2F_SCHPO Uncharacterized MFS-type transporter C530.15c OS=Schizosaccharomyces pombe (strain 972 / ATCC 24843) GN=SPBC530.15c PE=1 SV=2	357	142.124	1.24631e-48	40.52	3	564	1256	0	275	501
TRINITY_DN8541_c2_g2	1	1575	186	22.48	55.91	sp|P0DN32|CUPR1_ARTBC Probable GPI-anchored cupredoxin ARB_05732-1 OS=Arthroderma benhamiae (strain ATCC MYA-4681 / CBS 112371) GN=ARB_05732-1 PE=1 SV=1	134	56.225	7.35104e-08	28.81	-2	294	647	0	22	125
TRINITY_DN9303_c0_g8	1	1566	483	29.89	32.92	sp|Q10367|GLO3_SCHPO ADP-ribosylation factor GTPase-activating protein glo3 OS=Schizosaccharomyces pombe (strain 972 / ATCC 24843) GN=glo3 PE=3 SV=2	458	181.03	6.65458e-49	50.94	3	111	578	0	4	162
TRINITY_DN4788_c0_g1	1	1532	328	27.61	36.89	sp|O94255|CAN_SCHPO Carbonic anhydrase OS=Schizosaccharomyces pombe (strain 972 / ATCC 24843) GN=SPBP8B7.05c PE=1 SV=2	163	67.3958	4.6159e-23	33.33	-2	86	508	0	200	320
TRINITY_DN2808_c0_g1	1	1512	1088	74.21	34.65	sp|Q04336|YM54_YEAST Uncharacterized protein YMR196W OS=Saccharomyces cerevisiae (strain ATCC 204508 / S288c) GN=YMR196W PE=1 SV=1	1197	465.692	9.42921e-151	59.33	-3	389	1510	0	572	948
TRINITY_DN8442_c0_g3	1	1502	357	47.14	63.03	sp|Q09732|DCC1_SCHPO Sister chromatid cohesion protein dcc1 OS=Schizosaccharomyces pombe (strain 972 / ATCC 24843) GN=dcc1 PE=3 SV=2	181	74.3294	4.85823e-13	23.75	1	763	1470	0	133	357
TRINITY_DN8665_c1_g4	1	1492	578	28.35	18.17	sp|O14158|YE76_SCHPO AB hydrolase superfamily protein C4A8.06c OS=Schizosaccharomyces pombe (strain 972 / ATCC 24843) GN=SPAC4A8.06c PE=3 SV=1	174	71.633	5.80783e-12	30.5	-2	1	423	0	90	194
TRINITY_DN4840_c0_g1	1	1480	434	29.19	33.18	sp|Q9HFU4|MPI_CRYNJ Mannose-6-phosphate isomerase OS=Cryptococcus neoformans var. neoformans serotype D (strain JEC21 / ATCC MYA-565) GN=MAN1 PE=3 SV=2	371	147.517	1.17481e-102	49.31	3	957	1388	0	290	433
TRINITY_DN9322_c0_g4	1	1472	330	41.17	59.09	sp|G3Y422|YAND_ASPNA Short chain dehydrogenase yanD OS=Aspergillus niger (strain ATCC 1015 / CBS 113.46 / FGSC A1144 / LSHB Ac4 / NCTC 3858a / NRRL 328 / USDA 3528.7) GN=yanD PE=1 SV=2	128	53.9138	6.59595e-17	28.71	3	633	1238	0	128	322
TRINITY_DN4511_c0_g1	1	1440	384	33.96	49.74	sp|Q03529|SCS7_YEAST Ceramide very long chain fatty acid hydroxylase SCS7 OS=Saccharomyces cerevisiae (strain ATCC 204508 / S288c) GN=SCS7 PE=1 SV=1	337	134.42	4.62174e-55	38.74	-1	913	1401	0	7	197
TRINITY_DN3773_c0_g1	1	1429	495	20.78	18.79	sp|Q9ZUX1|C94C1_ARATH Cytochrome P450 94C1 OS=Arabidopsis thaliana GN=CYP94C1 PE=1 SV=1	156	64.6994	7.99022e-10	36.36	-1	1073	1369	0	382	474
TRINITY_DN7539_c0_g1	1	1421	344	55.52	72.67	sp|O31521|URHG1_BACSU Unsaturated rhamnogalacturonyl hydrolase YesR OS=Bacillus subtilis (strain 168) GN=yesR PE=1 SV=1	150	62.3882	2.88108e-09	24.91	-1	198	986	0	45	294
TRINITY_DN2268_c0_g1	1	1409	313	56.42	84.98	sp|P02723|ADT_NEUCR ADP,ATP carrier protein OS=Neurospora crassa (strain ATCC 24698 / 74-OR23-1A / CBS 708.71 / DSM 1257 / FGSC 987) GN=aac PE=3 SV=1	1021	397.897	1.41373e-134	77.07	-3	133	927	0	48	313
TRINITY_DN4160_c0_g1	1	1400	295	17.57	26.44	sp|Q9Y7K4|YGI2_SCHPO Uncharacterized protein C2A9.02 OS=Schizosaccharomyces pombe (strain 972 / ATCC 24843) GN=SPBC2A9.02 PE=3 SV=1	124	52.373	3.71811e-06	36.59	-3	1036	1281	0	1	78
TRINITY_DN5319_c0_g1	1	1390	616	47.05	37.01	sp|P36035|JEN1_YEAST Carboxylic acid transporter protein homolog OS=Saccharomyces cerevisiae (strain ATCC 204508 / S288c) GN=JEN1 PE=1 SV=1	179	73.559	2.22641e-14	28.38	3	210	863	0	295	522
TRINITY_DN4555_c0_g3	1	1383	478	77.01	74.27	sp|P22142|NDUS2_NEUCR NADH-ubiquinone oxidoreductase 49 kDa subunit, mitochondrial OS=Neurospora crassa (strain ATCC 24698 / 74-OR23-1A / CBS 708.71 / DSM 1257 / FGSC 987) GN=nuo-49 PE=1 SV=2	1540	597.816	0	75.49	1	79	1143	0	101	455
TRINITY_DN8225_c1_g1	1	1349	1140	73.17	29.3	sp|P53692|SMC6_SCHPO Structural maintenance of chromosomes protein 6 OS=Schizosaccharomyces pombe (strain 972 / ATCC 24843) GN=smc6 PE=1 SV=1	483	190.66	6.89572e-51	34.91	2	167	1153	0	794	1127
TRINITY_DN8491_c0_g2	1	1341	556	23.49	18.71	sp|O44400|F37C4_CAEEL Protein F37C4.5 OS=Caenorhabditis elegans GN=F37C4.5 PE=1 SV=3	182	74.7146	4.70856e-13	36.19	-3	1013	1327	0	392	495
TRINITY_DN3389_c0_g1	1	1325	295	64.98	84.41	sp|Q9P7D3|YOFG_SCHPO WHI2-like protein P4H10.16c OS=Schizosaccharomyces pombe (strain 972 / ATCC 24843) GN=SPBP4H10.16c PE=3 SV=1	363	144.436	7.64918e-38	33.45	-3	199	1059	0	37	285
TRINITY_DN8287_c0_g2	1	1318	536	21.4	17.72	sp|Q4WAZ6|FMAG_ASPFU Multifunctional cytochrome P450 monooxygenase af510 OS=Neosartorya fumigata (strain ATCC MYA-4609 / Af293 / CBS 101355 / FGSC A1100) GN=af510 PE=1 SV=1	176	72.4034	1.10393e-23	38.95	3	525	806	0	415	509
TRINITY_DN6068_c0_g2	1	1304	838	75.23	37.83	sp|A1CA51|BGLI_ASPCL Probable beta-glucosidase I OS=Aspergillus clavatus (strain ATCC 1007 / CBS 513.65 / DSM 816 / NCTC 3887 / NRRL 1) GN=bglI PE=3 SV=1	498	196.438	5.10104e-68	38.74	3	33	1013	0	294	610
TRINITY_DN8868_c2_g3	1	1294	529	34.31	24.95	sp|A1CFL6|PATI_ASPCL Cytochrome P450 monooxygenase patI OS=Aspergillus clavatus (strain ATCC 1007 / CBS 513.65 / DSM 816 / NCTC 3887 / NRRL 1) GN=patI PE=1 SV=2	194	79.337	4.61027e-17	31.21	-1	446	889	0	343	474
TRINITY_DN8650_c0_g1	1	1279	539	34.01	28.01	sp|B3FWT8|RDC3_METCM Efflux pump rdc3 OS=Metacordyceps chlamydosporia GN=rdc3 PE=3 SV=1	183	75.0998	3.13549e-20	33.11	2	293	727	0	78	228
TRINITY_DN7879_c3_g4	1	1269	579	56.74	36.27	sp|Q9P6J3|MALT_SCHPO Alpha-glucosidase OS=Schizosaccharomyces pombe (strain 972 / ATCC 24843) GN=mal1 PE=2 SV=1	653	256.144	7.24581e-77	56.56	-3	2	721	0	2	211
TRINITY_DN8589_c0_g1	1	1261	268	34.73	55.97	sp|O42919|RT26A_SCHPO Putative 37S ribosomal protein S26A, mitochondrial OS=Schizosaccharomyces pombe (strain 972 / ATCC 24843) GN=SPBC16A3.14 PE=3 SV=3	167	68.9366	7.75511e-12	28.67	-2	640	1077	0	48	197
TRINITY_DN3547_c0_g1	1	1247	405	32.96	31.85	sp|O60020|ASPR1_PHARH Aspartic protease OS=Phaffia rhodozyma GN=pr1 PE=1 SV=1	142	59.3066	2.97687e-08	30.71	2	281	691	0	264	392
TRINITY_DN4910_c0_g1	1	1240	418	75.24	66.27	sp|Q5ZMP7|AP3M1_CHICK AP-3 complex subunit mu-1 OS=Gallus gallus GN=AP3M1 PE=2 SV=1	467	184.496	1.30784e-51	35.35	-1	20	952	0	70	346
TRINITY_DN6392_c0_g1	1	1224	257	28.68	44.75	sp|Q3ZCI8|REEP4_BOVIN Receptor expression-enhancing protein 4 OS=Bos taurus GN=REEP4 PE=2 SV=1	231	93.5893	2.19076e-20	39.32	-1	784	1134	0	1	115
TRINITY_DN8072_c1_g1	1	1217	285	42.89	57.54	sp|Q54FE6|MCFS_DICDI Mitochondrial substrate carrier family protein S OS=Dictyostelium discoideum GN=mcfS PE=3 SV=1	225	91.2781	2.75869e-23	32.58	-3	13	534	0	122	285
TRINITY_DN4177_c0_g2	1	1204	418	76.99	65.31	sp|Q9CZP5|BCS1_MOUSE Mitochondrial chaperone BCS1 OS=Mus musculus GN=Bcs1l PE=1 SV=1	470	185.652	4.38661e-52	39.62	2	14	940	0	143	415
TRINITY_DN2145_c0_g2	1	1190	723	88.99	47.3	sp|A6RT94|UTP25_BOTFB U3 small nucleolar RNA-associated protein 25 OS=Botryotinia fuckeliana (strain B05.10) GN=UTP25 PE=3 SV=1	467	184.496	3.93721e-50	35.62	1	130	1188	0	114	455
TRINITY_DN3219_c0_g1	1	1176	1029	45.15	16.23	sp|O59809|IMA3_SCHPO Probable importin c550.11 OS=Schizosaccharomyces pombe (strain 972 / ATCC 24843) GN=SPCC550.11 PE=3 SV=1	251	101.293	1.26356e-37	32.2	2	641	1171	0	158	324
TRINITY_DN7801_c0_g1	1	1153	363	39.03	37.19	sp|Q01356|ARG13_NEUCR Amino-acid transporter arg-13 OS=Neurospora crassa (strain ATCC 24698 / 74-OR23-1A / CBS 708.71 / DSM 1257 / FGSC 987) GN=arg-13 PE=2 SV=1	249	100.523	1.18262e-33	42	-3	24	473	0	158	292
TRINITY_DN5230_c0_g2	1	1147	549	45.25	35.7	sp|P32949|LIP5_DIURU Lipase 5 OS=Diutina rugosa GN=LIP5 PE=3 SV=1	411	162.925	3.64912e-43	43.94	1	595	1113	0	40	235
TRINITY_DN3048_c0_g2	1	1128	637	27.66	13.97	sp|P38352|SAF1_YEAST SCF-associated factor 1 OS=Saccharomyces cerevisiae (strain ATCC 204508 / S288c) GN=SAF1 PE=1 SV=2	131	55.0694	7.17609e-07	38.68	-3	599	910	0	546	634
TRINITY_DN5842_c0_g1	1	1083	520	20.22	14.62	sp|Q9LT31|VPS9A_ARATH Vacuolar protein sorting-associated protein 9A OS=Arabidopsis thaliana GN=VPS9A PE=1 SV=1	145	60.4622	1.10352e-08	36.84	-1	448	666	0	184	259
TRINITY_DN2336_c0_g1	1	1078	186	30.33	59.14	sp|C4ZBV8|PTH_AGARV Peptidyl-tRNA hydrolase OS=Agathobacter rectalis (strain ATCC 33656 / DSM 3377 / JCM 17463 / KCTC 5835 / VPI 0990) GN=pth PE=3 SV=1	182	74.7146	1.71228e-14	39.82	-2	133	459	0	62	171
TRINITY_DN3942_c0_g1	1	1048	442	92.18	71.27	sp|Q54QG9|UBA3_DICDI NEDD8-activating enzyme E1 catalytic subunit OS=Dictyostelium discoideum GN=uba3 PE=1 SV=1	824	322.013	6.85678e-105	50.3	2	5	970	0	127	441
TRINITY_DN7932_c0_g5	1	1043	339	85.71	72.86	sp|Q9FUM9|HMT2_MAIZE Homocysteine S-methyltransferase 2 OS=Zea mays GN=HMT-2 PE=2 SV=1	226	91.6633	1.05138e-19	29.37	3	42	935	0	73	319
TRINITY_DN5410_c0_g1	1	1036	148	17.66	41.22	sp|Q9FKT3|UBC30_ARATH Ubiquitin-conjugating enzyme E2 30 OS=Arabidopsis thaliana GN=UBC30 PE=1 SV=1	271	108.997	4.3134e-51	77.05	-3	402	584	0	41	101
TRINITY_DN1685_c0_g1	1	1025	174	49.76	88.51	sp|Q4PBU8|ASF1_USTMA Histone chaperone ASF1 OS=Ustilago maydis (strain 521 / FGSC 9021) GN=ASF1 PE=3 SV=1	479	189.119	5.53355e-57	53.22	-3	478	987	0	1	154
TRINITY_DN3191_c0_g1	1	1018	247	63.95	87.45	sp|Q9R0Q9|MPU1_MOUSE Mannose-P-dolichol utilization defect 1 protein OS=Mus musculus GN=Mpdu1 PE=1 SV=1	267	107.457	1.3741e-25	40.09	-3	252	902	0	20	235
TRINITY_DN3439_c0_g1	1	1013	878	70.48	26.42	sp|Q9Y7U7|SND1_SCHPO Staphylococcal nuclease domain-containing protein 1 OS=Schizosaccharomyces pombe (strain 972 / ATCC 24843) GN=snd1 PE=1 SV=1	288	115.546	1.13725e-26	33.47	3	78	791	0	647	878
TRINITY_DN257_c0_g1	1	1007	229	22.05	34.06	sp|Q07801|DYR_CRYNJ Dihydrofolate reductase OS=Cryptococcus neoformans var. neoformans serotype D (strain JEC21 / ATCC MYA-565) GN=DFR1 PE=1 SV=1	226	91.6633	1.48412e-35	60.26	3	3	224	0	12	89
TRINITY_DN2343_c0_g3	1	995	1419	99.5	21.56	sp|P40976|LYS2_SCHPO L-2-aminoadipate reductase OS=Schizosaccharomyces pombe (strain 972 / ATCC 24843) GN=lys1 PE=1 SV=3	672	263.462	2.64574e-77	43.71	-3	1	990	0	767	1072
TRINITY_DN6177_c0_g1	1	972	347	94.14	86.46	sp|O42909|YBI2_SCHPO Zinc-type alcohol dehydrogenase-like protein C16A3.02c OS=Schizosaccharomyces pombe (strain 972 / ATCC 24843) GN=SPBC16A3.02c PE=3 SV=1	280	112.464	7.10922e-27	30.77	2	53	967	0	11	310
TRINITY_DN6672_c0_g2	1	960	387	22.81	18.86	sp|P37303|GLY1_YEAST Low specificity L-threonine aldolase OS=Saccharomyces cerevisiae (strain ATCC 204508 / S288c) GN=GLY1 PE=1 SV=2	213	86.6557	1.7911e-27	49.32	-1	730	948	0	144	216
TRINITY_DN8769_c1_g4	1	955	300	22.62	24.33	sp|A0A0U2IR85|MTT1_USTMD Mitochondrial tricarboxylate transporter 1 OS=Ustilago maydis GN=MTT1 PE=3 SV=1	246	99.3673	2.35387e-60	65.75	2	386	601	0	105	177
TRINITY_DN10005_c0_g1	1	949	300	69.86	73	sp|P19516|COX11_YEAST Cytochrome c oxidase assembly protein COX11, mitochondrial OS=Saccharomyces cerevisiae (strain ATCC 204508 / S288c) GN=COX11 PE=3 SV=2	556	218.779	4.77144e-67	50.23	-3	156	818	0	37	255
TRINITY_DN9258_c0_g3	1	943	384	14	11.46	sp|P06873|PRTK_PARAQ Proteinase K OS=Parengyodontium album GN=PROK PE=1 SV=2	126	53.1434	1.26078e-06	52.27	-3	99	230	0	78	121
TRINITY_DN3530_c0_g1	1	933	567	31.83	16.93	sp|Q94AX4|DLD_ARATH D-lactate dehydrogenase [cytochrome], mitochondrial OS=Arabidopsis thaliana GN=DLD PE=1 SV=1	231	93.5893	7.78805e-20	46.46	2	584	880	0	147	242
TRINITY_DN8208_c0_g2	1	929	187	27.13	44.92	sp|P15454|KGUA_YEAST Guanylate kinase OS=Saccharomyces cerevisiae (strain ATCC 204508 / S288c) GN=GUK1 PE=1 SV=2	219	88.9669	9.76408e-47	50.59	3	489	740	0	103	186
TRINITY_DN3373_c0_g1	1	923	559	25.68	14.31	sp|Q01772|GLOX_PHACH Aldehyde oxidase GLOX OS=Phanerochaete chrysosporium GN=GLX PE=1 SV=1	259	104.375	1.60402e-23	63.75	2	686	922	0	24	103
TRINITY_DN10519_c0_g1	1	895	807	73.41	27.76	sp|P38148|PPS1_YEAST Dual specificity protein phosphatase PPS1 OS=Saccharomyces cerevisiae (strain ATCC 204508 / S288c) GN=PPS1 PE=3 SV=1	330	131.724	1.58082e-32	35.32	1	94	750	0	583	806
TRINITY_DN3320_c0_g2	1	891	311	90.91	85.21	sp|Q95KC8|TIP_MACFA T-cell immunomodulatory protein (Fragment) OS=Macaca fascicularis GN=ITFG1 PE=2 SV=2	403	159.844	1.4106e-44	36.1	1	82	891	0	28	292
TRINITY_DN7415_c0_g2	1	827	454	57.68	30.84	sp|Q9R064|GORS2_RAT Golgi reassembly-stacking protein 2 OS=Rattus norvegicus GN=Gorasp2 PE=1 SV=3	240	97.0561	1.0726e-30	35.85	2	182	658	0	15	154
TRINITY_DN7988_c0_g2	1	821	438	77.83	48.4	sp|Q9P7L5|OAT_SCHPO Ornithine aminotransferase car2 OS=Schizosaccharomyces pombe (strain 972 / ATCC 24843) GN=car2 PE=2 SV=1	732	286.574	3.15985e-92	62.91	1	1	639	0	220	431
TRINITY_DN5350_c0_g1	1	815	388	45.28	31.19	sp|P29138|CUDP_METAN Cuticle-degrading protease OS=Metarhizium anisopliae GN=PR1 PE=1 SV=1	357	142.124	3.84428e-41	59.35	3	261	629	0	267	387
TRINITY_DN9313_c1_g2	1	811	136	23.3	46.32	sp|O14388|RL27A_SCHPO 60S ribosomal protein L27-A OS=Schizosaccharomyces pombe (strain 972 / ATCC 24843) GN=rpl2701 PE=2 SV=2	245	98.9821	7.82916e-41	68.25	-1	161	349	0	74	136
TRINITY_DN9011_c0_g3	1	806	315	43.92	40.95	sp|Q8LEM6|HA22H_ARATH HVA22-like protein h OS=Arabidopsis thaliana GN=HVA22H PE=2 SV=2	228	92.4337	2.02257e-20	30.23	1	184	537	0	14	142
TRINITY_DN10100_c0_g1	1	803	836	41.84	11.24	sp|Q9Y7J8|YGL1_SCHPO Uncharacterized protein C216.01c OS=Schizosaccharomyces pombe (strain 972 / ATCC 24843) GN=SPBC216.01c PE=2 SV=3	186	76.2554	2.59138e-14	36.61	-2	44	379	0	49	142
TRINITY_DN3197_c0_g2	1	797	155	33.5	59.35	sp|Q9UT70|BET5_SCHPO Transport protein particle subunit bet5 OS=Schizosaccharomyces pombe (strain 972 / ATCC 24843) GN=bet5 PE=3 SV=2	170	70.0922	3.31816e-16	35.87	-1	30	296	0	64	155
TRINITY_DN9002_c0_g4	1	787	282	20.2	17.02	sp|Q9P544|VDAC_SCHPO Probable mitochondrial outer membrane protein porin OS=Schizosaccharomyces pombe (strain 972 / ATCC 24843) GN=SPAC1635.01 PE=3 SV=1	137	57.3806	2.29979e-08	54.72	-3	624	782	0	226	273
TRINITY_DN5032_c0_g3	1	783	725	49.43	19.31	sp|P53134|YGL4_YEAST Putative oligopeptide transporter YGL114W OS=Saccharomyces cerevisiae (strain ATCC 204508 / S288c) GN=YGL114W PE=1 SV=1	289	115.931	1.88377e-27	48.57	-2	219	605	0	42	181
TRINITY_DN963_c0_g1	1	773	144	52.39	93.75	sp|P58234|RS19A_SCHPO 40S ribosomal protein S19-A OS=Schizosaccharomyces pombe (strain 972 / ATCC 24843) GN=rps1901 PE=2 SV=1	533	209.92	1.43018e-66	71.11	-1	276	680	0	6	140
TRINITY_DN8561_c0_g1	1	764	2359	82.46	8.9	sp|Q9SSD2|PRP8A_ARATH Pre-mRNA-processing-splicing factor 8A OS=Arabidopsis thaliana GN=PRP8A PE=1 SV=1	1065	414.846	6.00052e-131	90.48	2	134	763	0	1374	1583
TRINITY_DN8478_c0_g2	1	738	1188	86.59	18.77	sp|Q9USG8|MU190_SCHPO Meiotically up-regulated gene 190 protein OS=Schizosaccharomyces pombe (strain 972 / ATCC 24843) GN=mug190 PE=1 SV=1	294	117.857	4.7784e-28	29.33	-3	8	646	0	230	452
TRINITY_DN5437_c0_g1	1	725	480	48.41	24.79	sp|Q7M4T0|NEG1_NEUCR Endo-1,6-beta-D-glucanase OS=Neurospora crassa (strain ATCC 24698 / 74-OR23-1A / CBS 708.71 / DSM 1257 / FGSC 987) GN=neg-1 PE=1 SV=2	196	80.1073	6.37748e-16	36.13	1	4	354	0	204	322
TRINITY_DN548_c0_g1	1	720	360	65.83	36.39	sp|Q0CEU4|EGLD_ASPTN Probable endo-beta-1,4-glucanase D OS=Aspergillus terreus (strain NIH 2624 / FGSC A1156) GN=eglD PE=3 SV=1	260	104.76	1.07225e-36	37.74	2	242	715	0	83	213
TRINITY_DN8477_c0_g1	1	704	304	43.89	34.87	sp|Q12477|PCL9_YEAST PHO85 cyclin-9 OS=Saccharomyces cerevisiae (strain ATCC 204508 / S288c) GN=PCL9 PE=1 SV=1	160	66.2402	1.26273e-11	28.3	1	316	624	0	49	154
TRINITY_DN4398_c1_g2	1	687	551	48.91	20.51	sp|P49374|HGT1_KLULA High-affinity glucose transporter OS=Kluyveromyces lactis (strain ATCC 8585 / CBS 2359 / DSM 70799 / NBRC 1267 / NRRL Y-1140 / WM37) GN=HGT1 PE=3 SV=1	165	68.1662	2.42093e-20	36.28	-2	12	347	0	143	255
TRINITY_DN3758_c0_g1	1	683	139	79.5	100	sp|P0CT61|RL23B_SCHPO 60S ribosomal protein L23-B OS=Schizosaccharomyces pombe (strain 972 / ATCC 24843) GN=rpl2302 PE=3 SV=1	416	164.851	1.91452e-49	51.93	2	41	583	0	1	139
TRINITY_DN2424_c0_g1	1	678	246	65.04	56.1	sp|Q9FSG7|TP1A_MALDO Thaumatin-like protein 1a OS=Malus domestica GN=TL1 PE=1 SV=1	270	108.612	6.38505e-27	44	-3	5	445	0	109	246
TRINITY_DN930_c0_g1	1	674	556	33.83	13.85	sp|Q8P5D7|BETA_XANCP Oxygen-dependent choline dehydrogenase OS=Xanthomonas campestris pv. campestris (strain ATCC 33913 / DSM 3586 / NCPPB 528 / LMG 568 / P 25) GN=betA PE=3 SV=1	169	69.707	1.92329e-12	44.16	-1	15	242	0	1	77
TRINITY_DN3075_c0_g2	1	670	167	58.66	77.25	sp|Q9M8K7|DUS1B_ARATH Dual specificity protein phosphatase 1B OS=Arabidopsis thaliana GN=DSPTP1B PE=1 SV=1	226	91.6633	2.36598e-21	36.84	-3	147	539	0	32	160
TRINITY_DN4779_c0_g1	1	645	299	75.35	46.82	sp|P0CP44|EFM7_CRYNJ Protein N-terminal and lysine N-methyltransferase EFM7 OS=Cryptococcus neoformans var. neoformans serotype D (strain JEC21 / ATCC MYA-565) GN=EFM7 PE=3 SV=1	324	129.413	2.3748e-34	41.36	-3	2	487	0	47	186
TRINITY_DN3628_c0_g1	1	636	874	99.53	24.14	sp|Q99128|AP1G1_USTMA AP-1 complex subunit gamma-1 OS=Ustilago maydis (strain 521 / FGSC 9021) GN=APL4 PE=3 SV=3	996	388.267	8.94798e-128	89.57	-2	3	635	0	238	448
TRINITY_DN2882_c0_g1	1	632	389	57.44	31.36	sp|P56099|HIS8_CANMA Histidinol-phosphate aminotransferase OS=Candida maltosa GN=HIS5 PE=3 SV=1	290	116.316	4.3334e-29	48.46	-3	1	363	0	2	123
TRINITY_DN3228_c0_g1	1	616	701	59.42	17.69	sp|P53326|YG5L_YEAST Uncharacterized protein YGR266W OS=Saccharomyces cerevisiae (strain ATCC 204508 / S288c) GN=YGR266W PE=1 SV=1	229	92.8189	3.7345e-20	41.6	1	76	441	0	345	468
TRINITY_DN7597_c0_g5	1	612	4345	63.24	2.97	sp|P45444|DYHC_EMENI Dynein heavy chain, cytoplasmic OS=Emericella nidulans (strain FGSC A4 / ATCC 38163 / CBS 112.46 / NRRL 194 / M139) GN=nudA PE=3 SV=2	399	158.303	3.5941e-42	57.36	-3	176	562	0	1069	1197
TRINITY_DN2989_c0_g2	1	594	109	48.99	89.91	sp|P04158|SC1_SCHCO Fruiting body protein SC1 OS=Schizophyllum commune GN=SC1 PE=2 SV=2	179	73.559	1.80312e-15	42.45	-2	168	458	0	12	109
TRINITY_DN3018_c0_g1	1	590	516	25.42	9.69	sp|Q9ZU50|BAT1_ARATH Amino-acid permease BAT1 OS=Arabidopsis thaliana GN=BAT1 PE=2 SV=2	116	49.2914	6.59158e-06	44	2	50	199	0	465	514
TRINITY_DN2946_c0_g1	1	586	471	50.17	22.08	sp|A8NAN2|ARGJ_COPC7 Arginine biosynthesis bifunctional protein ArgJ, mitochondrial OS=Coprinopsis cinerea (strain Okayama-7 / 130 / ATCC MYA-4618 / FGSC 9003) GN=CC1G_08401 PE=3 SV=1	377	149.828	3.81045e-44	67.31	2	140	433	0	368	471
TRINITY_DN146_c0_g1	1	579	388	72.54	42.27	sp|A1CFL1|PATD_ASPCL Alcohol dehydrogenase patD OS=Aspergillus clavatus (strain ATCC 1007 / CBS 513.65 / DSM 816 / NCTC 3887 / NRRL 1) GN=patD PE=1 SV=1	168	69.3218	9.08075e-13	30.72	-1	160	579	0	196	359
TRINITY_DN7833_c0_g4	1	575	533	39.13	14.07	sp|O59805|YJV7_SCHPO Putative amidase C550.07 OS=Schizosaccharomyces pombe (strain 972 / ATCC 24843) GN=SPCC550.07 PE=3 SV=1	182	74.7146	2.64058e-14	46.67	2	347	571	0	60	134
TRINITY_DN7331_c0_g3	1	572	453	84.97	35.76	sp|P36209|STS1_SCHPO Delta(24(24(1)))-sterol reductase OS=Schizosaccharomyces pombe (strain 972 / ATCC 24843) GN=sts1 PE=1 SV=2	432	171.014	4.16422e-49	48.77	1	4	489	0	292	453
TRINITY_DN6072_c1_g1	1	567	765	76.72	19.35	sp|Q56078|BGLX_SALTY Periplasmic beta-glucosidase OS=Salmonella typhimurium (strain LT2 / SGSC1412 / ATCC 700720) GN=bglX PE=3 SV=2	230	93.2041	2.23725e-20	40	1	127	561	0	274	421
TRINITY_DN6183_c0_g2	1	563	277	95.91	67.15	sp|Q9JHW0|PSB7_RAT Proteasome subunit beta type-7 OS=Rattus norvegicus GN=Psmb7 PE=1 SV=1	694	271.937	3.79951e-90	73.12	-3	10	549	0	5	190
TRINITY_DN2358_c0_g2	1	560	379	63.75	30.34	sp|Q09912|PSI1_SCHPO Protein psi1 OS=Schizosaccharomyces pombe (strain 972 / ATCC 24843) GN=psi1 PE=2 SV=2	148	61.6178	3.11863e-10	33.33	1	1	357	0	252	366
TRINITY_DN2641_c0_g2	1	553	1678	99.82	9.95	sp|P29742|CLH_DROME Clathrin heavy chain OS=Drosophila melanogaster GN=Chc PE=1 SV=1	481	189.889	1.45191e-53	53.26	2	2	553	0	1349	1515
TRINITY_DN3125_c0_g1	1	546	398	68.13	26.88	sp|O59668|YB83_SCHPO LisH domain-containing protein C29A3.03c OS=Schizosaccharomyces pombe (strain 972 / ATCC 24843) GN=SPBC29A3.03c PE=4 SV=1	271	108.997	7.68925e-27	44.35	3	174	545	0	269	375
TRINITY_DN1237_c0_g1	1	536	161	62.13	62.11	sp|Q9SX26|PCR12_ARATH Protein PLANT CADMIUM RESISTANCE 12 OS=Arabidopsis thaliana GN=PCR12 PE=2 SV=2	160	66.2402	1.18294e-12	37.72	-1	144	476	0	29	128
TRINITY_DN4150_c0_g1	1	514	709	92.8	23.41	sp|Q9NUQ8|ABCF3_HUMAN ATP-binding cassette sub-family F member 3 OS=Homo sapiens GN=ABCF3 PE=1 SV=2	302	120.939	2.26256e-30	40.34	-3	36	512	0	242	407
TRINITY_DN7164_c0_g1	1	483	694	68.94	15.99	sp|Q5K8R6|CXT1_CRYNJ Beta-1,2-xylosyltransferase 1 OS=Cryptococcus neoformans var. neoformans serotype D (strain JEC21 / ATCC MYA-565) GN=CXT1 PE=1 SV=1	307	122.865	3.52439e-31	54.95	-1	109	441	0	551	661
TRINITY_DN1667_c0_g2	1	473	1095	83.72	13.24	sp|Q9C7S5|PSYR1_ARATH Tyrosine-sulfated glycopeptide receptor 1 OS=Arabidopsis thaliana GN=PSY1R PE=1 SV=1	115	48.9062	4.63865e-06	29.53	-2	77	472	0	935	1079
TRINITY_DN835_c0_g2	1	461	1012	66.38	10.08	sp|Q8LPL6|AP2A1_ARATH AP-2 complex subunit alpha-1 OS=Arabidopsis thaliana GN=ALPHA-ADR PE=1 SV=1	268	107.842	4.60556e-32	47.06	3	156	461	0	88	189
TRINITY_DN2684_c0_g1	1	449	902	71.49	11.97	sp|O14053|UTP21_SCHPO U3 small nucleolar RNA-associated protein 21 homolog OS=Schizosaccharomyces pombe (strain 972 / ATCC 24843) GN=SPCC1672.07 PE=3 SV=1	208	84.7297	6.25742e-18	43.52	-3	127	447	0	641	748
TRINITY_DN205_c0_g2	1	447	419	67.79	23.87	sp|Q9USW3|YHZ7_SCHPO Probable glycosidase C21B10.07 OS=Schizosaccharomyces pombe (strain 972 / ATCC 24843) GN=SPBC21B10.07 PE=3 SV=1	164	67.781	1.77011e-12	35.64	-1	73	375	0	129	228
TRINITY_DN1279_c0_g1	1	445	469	71.46	23.45	sp|Q7SH17|ACKA_NEUCR Probable acetate kinase OS=Neurospora crassa (strain ATCC 24698 / 74-OR23-1A / CBS 708.71 / DSM 1257 / FGSC 987) GN=B12J7.040 PE=3 SV=3	222	90.1225	3.40658e-20	45.22	-3	126	443	0	359	468
TRINITY_DN8084_c0_g6	1	414	209	43.48	28.71	sp|O74746|SPF31_SCHPO J domain-containing protein spf31 OS=Schizosaccharomyces pombe (strain 972 / ATCC 24843) GN=spf31 PE=4 SV=1	128	53.9138	2.18523e-08	43.33	-1	157	336	0	130	189
TRINITY_DN2554_c0_g2	1	412	231	88.83	52.81	sp|P40232|CSK2B_SCHPO Casein kinase II subunit beta OS=Schizosaccharomyces pombe (strain 972 / ATCC 24843) GN=ckb1 PE=2 SV=2	443	175.252	1.06247e-53	65.57	1	46	411	0	24	145
TRINITY_DN171_c0_g1	1	400	100	53.25	71	sp|Q9SK39|SBP3_ARATH Probable steroid-binding protein 3 OS=Arabidopsis thaliana GN=MP3 PE=1 SV=1	150	62.3882	6.46653e-12	43.66	3	63	275	0	22	92
TRINITY_DN9147_c0_g1	1	397	796	34.76	5.78	sp|Q38CE9|PIF6_TRYB2 ATP-dependent DNA helicase PIF6 OS=Trypanosoma brucei brucei (strain 927/4 GUTat10.1) GN=PIF6 PE=3 SV=1	117	49.6766	2.00726e-06	50	-2	109	246	0	608	653
TRINITY_DN6470_c0_g1	1	363	352	67.77	23.58	sp|Q8WZY4|RPN8_NEUCR 26S proteasome regulatory subunit rpn-8 OS=Neurospora crassa (strain ATCC 24698 / 74-OR23-1A / CBS 708.71 / DSM 1257 / FGSC 987) GN=rpn-8 PE=3 SV=1	273	109.768	4.58909e-28	60.24	3	117	362	0	10	92
TRINITY_DN5037_c0_g2	1	336	772	83.04	13.47	sp|Q04411|URC2_YEAST Uracil catabolism protein 2 OS=Saccharomyces cerevisiae (strain ATCC 204508 / S288c) GN=URC2 PE=1 SV=1	120	50.8322	7.14978e-07	28.95	3	45	323	0	45	148
TRINITY_DN6425_c0_g6	1	331	440	98.79	24.77	sp|Q10305|GDI1_SCHPO Probable secretory pathway GDP dissociation inhibitor 1 OS=Schizosaccharomyces pombe (strain 972 / ATCC 24843) GN=gdi1 PE=3 SV=1	349	139.043	1.70107e-38	66.06	-1	5	331	0	50	158
TRINITY_DN1743_c0_g2	1	319	299	98.75	35.12	sp|P0CU37|DPH52_CANAL Diphthine methyl ester synthase 2 OS=Candida albicans (strain SC5314 / ATCC MYA-2876) GN=CAALFM_C503700CA PE=3 SV=1	444	175.637	1.29845e-53	77.14	3	3	317	0	89	193
TRINITY_DN3217_c0_g1	1	312	330	94.23	30.61	sp|D4B4X4|CHI33_ARTBC Class III chitinase ARB_03514 OS=Arthroderma benhamiae (strain ATCC MYA-4681 / CBS 112371) GN=ARB_03514 PE=1 SV=2	219	88.9669	6.22236e-21	52.94	-1	19	312	0	216	316
TRINITY_DN10639_c0_g1	1	301	202	44.85	21.29	sp|Q59WG5|Y2336_CANAL Probable pathogenesis-related protein CaO19.2336 OS=Candida albicans (strain SC5314 / ATCC MYA-2876) GN=CAALFM_C110810WA PE=2 SV=1	108	46.2098	5.69543e-06	46.67	-2	166	300	0	151	193
TRINITY_DN2574_c0_g1	1	280	1081	64.29	5.92	sp|Q5A599|NIK1_CANAL Histidine protein kinase NIK1 OS=Candida albicans (strain SC5314 / ATCC MYA-2876) GN=NIK1 PE=1 SV=3	144	60.077	4.16091e-10	51.56	-1	29	208	0	427	490
TRINITY_DN9376_c0_g1	1	260	544	99.23	15.62	sp|A7HU16|BVMO_PARL1 Baeyer-Villiger monooxygenase OS=Parvibaculum lavamentivorans (strain DS-1 / DSM 13023 / NCIMB 13966) GN=Plav_1781 PE=1 SV=1	237	95.9005	4.98489e-23	51.16	-2	2	259	0	359	443
TRINITY_DN1362_c0_g1	1	256	914	67.97	6.35	sp|O62621|COPB2_DROME Coatomer subunit beta&apos; OS=Drosophila melanogaster GN=beta&apos;COP PE=2 SV=2	242	97.8265	2.86059e-23	68.97	1	4	177	0	75	132
TRINITY_DN10293_c0_g1	1	254	736	96.85	10.73	sp|A2QTU5|XYLA_ASPNC Alpha-xylosidase A OS=Aspergillus niger (strain CBS 513.88 / FGSC A1513) GN=axlA PE=1 SV=1	202	82.4185	4.69619e-18	50	2	2	247	0	456	534
TRINITY_DN1743_c0_g1	1	250	285	93.6	27.37	sp|Q6MY91|DPH5_ASPFU Diphthine methyl ester synthase OS=Neosartorya fumigata (strain ATCC MYA-4609 / Af293 / CBS 101355 / FGSC A1100) GN=dph5 PE=3 SV=1	267	107.457	4.78178e-28	66.67	-1	2	235	0	1	78
TRINITY_DN1832_c0_g1	1	239	604	95.4	12.58	sp|P78706|RCO1_NEUCR Transcriptional repressor rco-1 OS=Neurospora crassa (strain ATCC 24698 / 74-OR23-1A / CBS 708.71 / DSM 1257 / FGSC 987) GN=rco-1 PE=4 SV=2	318	127.102	2.63755e-34	73.68	-3	10	237	0	303	378
TRINITY_DN1509_c0_g1	1	221	511	97.74	13.89	sp|O00087|DLDH_SCHPO Dihydrolipoyl dehydrogenase, mitochondrial OS=Schizosaccharomyces pombe (strain 972 / ATCC 24843) GN=dld1 PE=2 SV=2	220	89.3521	6.71822e-21	63.01	-2	2	217	0	140	210
TRINITY_DN1663_c0_g1	1	219	372	80.82	15.86	sp|C5G0A8|LAP3_ARTOC Probable leucine aminopeptidase MCYG_08380 OS=Arthroderma otae (strain ATCC MYA-4605 / CBS 113480) GN=MCYG_08380 PE=3 SV=1	181	74.3294	6.39487e-16	57.63	3	42	218	0	222	280
TRINITY_DN3516_c0_g4	1	216	1077	98.61	6.31	sp|Q9UT61|MAN1_SCHPO Alpha-mannosidase OS=Schizosaccharomyces pombe (strain 972 / ATCC 24843) GN=ams1 PE=3 SV=1	175	72.0182	1.37611e-14	49.3	3	3	215	0	549	616
TRINITY_DN6599_c0_g1	1	205	507	87.8	11.64	sp|Q9US37|YFZ4_SCHPO Uncharacterized transporter C1039.04 OS=Schizosaccharomyces pombe (strain 972 / ATCC 24843) GN=SPAC1039.04 PE=3 SV=1	125	52.7582	4.2602e-08	51.67	-2	25	204	0	164	222
TRINITY_DN8911_c0_g1	1	7967	310	11.3	95.16	sp|C3K630|LAAA_PSEFS L-amino acid amidase OS=Pseudomonas fluorescens (strain SBW25) GN=laaA PE=3 SV=1	544	214.157	5.01002e-59	42.95	1	4939	5838	0	2	296
TRINITY_DN9023_c0_g3	1	6798	361	7.81	49.03	sp|Q9UR19|VPL1_PLEER Versatile peroxidase VPL1 OS=Pleurotus eryngii GN=vpl1 PE=1 SV=1	732	286.574	1.23412e-83	77.97	2	5435	5965	0	26	202
TRINITY_DN9354_c0_g1	1	5695	1001	37.35	69.33	sp|Q8VHK9|DHX36_MOUSE ATP-dependent RNA helicase DHX36 OS=Mus musculus GN=Dhx36 PE=1 SV=2	1068	416.001	6.42129e-122	36.08	2	2774	4900	0	175	868
TRINITY_DN9166_c0_g1	1	5501	564	7.42	23.23	sp|Q54DA8|STIP1_DICDI Protein STIP1 homolog OS=Dictyostelium discoideum GN=sti1 PE=3 SV=1	132	55.4546	4.38668e-06	28.06	2	41	448	0	381	511
TRINITY_DN9350_c1_g1	1	5258	421	11.58	41.09	sp|D4B388|FLA_ARTBC Fasciclin-like arabinogalactan protein ARB_02922 OS=Arthroderma benhamiae (strain ATCC MYA-4681 / CBS 112371) GN=ARB_02922 PE=3 SV=1	132	55.4546	3.40715e-06	25.98	3	4203	4811	0	124	296
TRINITY_DN9095_c0_g2	1	5080	230	14.23	98.7	sp|Q9C0W1|NRK1_SCHPO Nicotinamide riboside kinase OS=Schizosaccharomyces pombe (strain 972 / ATCC 24843) GN=nrk1 PE=3 SV=1	258	103.99	1.48159e-22	30.58	1	1402	2124	0	4	230
TRINITY_DN9236_c0_g1	1	4884	917	4.73	6.76	sp|E9CUF4|DAPB_COCPS Probable dipeptidyl-aminopeptidase B OS=Coccidioides posadasii (strain RMSCC 757 / Silveira) GN=DAPB PE=3 SV=1	135	56.6102	7.29902e-21	37.66	-1	3889	4119	0	544	605
TRINITY_DN8448_c0_g1	1	4702	415	16.08	58.8	sp|Q9US35|DSD1_SCHPO D-serine dehydratase OS=Schizosaccharomyces pombe (strain 972 / ATCC 24843) GN=SPAC1039.06 PE=3 SV=1	504	198.749	4.23644e-53	43.19	2	2549	3304	0	172	415
TRINITY_DN6521_c0_g2	1	4529	283	13.18	68.9	sp|Q70KF8|SDHB_UROFA Succinate dehydrogenase [ubiquinone] iron-sulfur subunit, mitochondrial OS=Uromyces fabae GN=SDH2 PE=3 SV=1	793	310.071	9.02997e-94	73.5	2	2	598	0	84	278
TRINITY_DN9282_c1_g1	1	4422	994	25.64	35.61	sp|A2QL84|BGALC_ASPNC Probable beta-galactosidase C OS=Aspergillus niger (strain CBS 513.88 / FGSC A1513) GN=lacC PE=3 SV=1	461	182.185	4.16497e-106	34.56	3	3288	4421	0	344	697
TRINITY_DN7844_c1_g2	1	4323	2202	18.46	11.99	sp|Q4WYG2|NRPS5_ASPFU Nonribosomal peptide synthetase 5 OS=Neosartorya fumigata (strain ATCC MYA-4609 / Af293 / CBS 101355 / FGSC A1100) GN=NRPS5 PE=3 SV=2	490	193.356	1.54732e-69	37.41	-1	1882	2679	0	1281	1544
TRINITY_DN9356_c4_g1	1	4231	605	4.04	7.27	sp|Q2U685|MUB1_ASPOR MYND-type zinc finger protein samB OS=Aspergillus oryzae (strain ATCC 42149 / RIB 40) GN=samB PE=3 SV=1	129	54.299	1.07371e-14	45.61	-3	1713	1883	0	516	559
TRINITY_DN9079_c2_g1	1	4157	1029	40.85	52.28	sp|Q1K9C4|YFK7_SCHPO Probable E3 ubiquitin protein ligase C167.07c OS=Schizosaccharomyces pombe (strain 972 / ATCC 24843) GN=SPAC167.07c PE=2 SV=1	1198	466.077	1.92758e-141	44.82	-1	1227	2924	0	492	1029
TRINITY_DN9158_c1_g1	1	4080	371	27.06	99.19	sp|Q5U8Z7|PPID_AMAMU Peptidyl-prolyl cis-trans isomerase D OS=Amanita muscaria GN=Cyp40 PE=2 SV=1	1061	413.305	3.04014e-130	68.48	-1	2821	3924	0	4	371
TRINITY_DN9255_c0_g1	1	3996	506	39.41	100	sp|Q92400|GUX2_AGABI Exoglucanase OS=Agaricus bisporus GN=cel2 PE=2 SV=1	1343	521.931	1.6294e-169	55.24	-1	94	1668	0	1	506
TRINITY_DN6213_c0_g2	1	3911	714	3.14	6.02	sp|Q54TE3|GTAJ_DICDI GATA zinc finger domain-containing protein 10 OS=Dictyostelium discoideum GN=gtaJ PE=4 SV=1	178	73.1738	1.12251e-11	72.09	-2	668	790	0	630	672
TRINITY_DN8027_c0_g1	1	3854	1060	28.88	31.79	sp|P53836|CA120_YEAST CCR4-NOT transcriptional complex subunit CAF120 OS=Saccharomyces cerevisiae (strain ATCC 204508 / S288c) GN=CAF120 PE=1 SV=1	359	142.895	5.56454e-33	28.42	3	723	1835	0	60	396
TRINITY_DN5073_c0_g2	1	3782	797	58.46	92.35	sp|Q2TYT2|BXLB_ASPOR Probable exo-1,4-beta-xylosidase bxlB OS=Aspergillus oryzae (strain ATCC 42149 / RIB 40) GN=bxlB PE=3 SV=1	2153	833.943	0	56.89	-3	1507	3717	0	48	783
TRINITY_DN7517_c0_g1	1	3704	680	9.48	17.21	sp|Q921G6|LRCH4_MOUSE Leucine-rich repeat and calponin homology domain-containing protein 4 OS=Mus musculus GN=Lrch4 PE=1 SV=1	173	71.2478	3.7296e-11	39.83	-1	2421	2771	0	126	242
TRINITY_DN8302_c0_g1	1	3632	1003	18.42	22.83	sp|Q8I7P9|POL5_DROME Retrovirus-related Pol polyprotein from transposon opus OS=Drosophila melanogaster GN=pol PE=3 SV=1	244	98.5969	8.31673e-27	29.36	3	2724	3392	0	315	543
TRINITY_DN3840_c0_g2	1	3564	1112	22.22	22.3	sp|P28706|RAD13_SCHPO DNA repair protein rad13 OS=Schizosaccharomyces pombe (strain 972 / ATCC 24843) GN=rad13 PE=2 SV=2	604	237.269	6.77938e-69	45.11	-1	970	1761	0	701	948
TRINITY_DN7609_c0_g1	1	3508	935	59.52	73.8	sp|P11586|C1TC_HUMAN C-1-tetrahydrofolate synthase, cytoplasmic OS=Homo sapiens GN=MTHFD1 PE=1 SV=3	2101	813.913	0	64.18	3	9	2096	0	246	935
TRINITY_DN7049_c0_g1	1	3468	557	6.31	12.39	sp|E9EPV1|MBZ11_METRA BZIP-type transcription factor MBZ1 OS=Metarhizium robertsii (strain ARSEF 23 / ATCC MYA-3075) GN=MBZ1 PE=2 SV=2	161	66.6254	8.41527e-10	50	-3	1733	1951	0	262	330
TRINITY_DN8638_c1_g5	1	3293	1403	23.05	20.88	sp|Q10475|IF4G_SCHPO Eukaryotic translation initiation factor 4 gamma OS=Schizosaccharomyces pombe (strain 972 / ATCC 24843) GN=tif471 PE=1 SV=1	365	145.206	9.83466e-34	33.33	-3	1894	2652	0	972	1264
TRINITY_DN7580_c0_g1	1	3210	288	18.97	61.81	sp|Q0WP96|PGR_ARATH Protein PGR OS=Arabidopsis thaliana GN=PGR PE=2 SV=1	218	88.5817	8.601e-19	34.31	1	1351	1959	0	69	246
TRINITY_DN8088_c0_g1	1	3169	2335	61.34	27.67	sp|Q99PV0|PRP8_MOUSE Pre-mRNA-processing-splicing factor 8 OS=Mus musculus GN=Prpf8 PE=1 SV=2	2455	950.273	0	72.2	1	1	1944	0	1690	2335
TRINITY_DN8455_c0_g1	1	3094	571	25.31	47.29	sp|P81898|PNAA_PRUDU Peptide-N4-(N-acetyl-beta-glucosaminyl)asparagine amidase A OS=Prunus dulcis PE=1 SV=2	352	140.198	2.98718e-33	35.38	-2	1660	2442	0	89	358
TRINITY_DN6763_c0_g2	1	3055	1405	73.26	52.74	sp|O94666|RPC1_SCHPO DNA-directed RNA polymerase III subunit rpc1 OS=Schizosaccharomyces pombe (strain 972 / ATCC 24843) GN=rpc1 PE=2 SV=1	2445	946.421	0	59.87	-1	671	2908	0	14	754
TRINITY_DN8609_c0_g3	1	2918	509	20.05	29.86	sp|Q5AAG6|MKC1_CANAL Mitogen-activated protein kinase MKC1 OS=Candida albicans (strain SC5314 / ATCC MYA-2876) GN=MKC1 PE=1 SV=1	448	177.178	3.93649e-89	52.31	1	520	1104	0	134	285
TRINITY_DN7611_c0_g1	1	2885	1309	22.46	15.13	sp|Q09743|RICTR_SCHPO Target of rapamycin complex 2 subunit ste20 OS=Schizosaccharomyces pombe (strain 972 / ATCC 24843) GN=ste20 PE=1 SV=1	473	186.808	3.32615e-67	41.2	-1	3	650	0	706	903
TRINITY_DN3428_c0_g6	1	2854	2958	82.83	27.76	sp|Q12150|CSF1_YEAST Protein CSF1 OS=Saccharomyces cerevisiae (strain ATCC 204508 / S288c) GN=CSF1 PE=3 SV=1	649	254.603	1.07074e-74	25.09	-3	3	2366	0	129	949
TRINITY_DN8688_c0_g1	1	2819	622	11.71	17.68	sp|P38889|SKN7_YEAST Transcription factor SKN7 OS=Saccharomyces cerevisiae (strain ATCC 204508 / S288c) GN=SKN7 PE=1 SV=1	344	137.117	3.95387e-32	57.27	1	1837	2166	0	379	488
TRINITY_DN8314_c1_g1	1	2791	676	5.91	7.69	sp|P53983|ASI3_YEAST Protein ASI3 OS=Saccharomyces cerevisiae (strain ATCC 204508 / S288c) GN=ASI3 PE=1 SV=2	162	67.0106	6.29852e-10	49.09	2	2537	2701	0	624	675
TRINITY_DN7862_c0_g1	1	2762	529	16.84	33.27	sp|Q00613|HSF1_HUMAN Heat shock factor protein 1 OS=Homo sapiens GN=HSF1 PE=1 SV=1	264	106.301	1.56892e-22	34.09	-1	1122	1586	0	18	193
TRINITY_DN7922_c0_g4	1	2667	357	14.85	33.05	sp|Q5BCX8|EGLD_EMENI Endo-beta-1,4-glucanase D OS=Emericella nidulans (strain FGSC A4 / ATCC 38163 / CBS 112.46 / NRRL 194 / M139) GN=eglD PE=1 SV=1	229	92.8189	8.43188e-19	42.86	-1	145	540	0	50	167
TRINITY_DN6205_c0_g1	1	2644	450	15.54	31.11	sp|Q08448|YO059_YEAST Putative lipase YOR059C OS=Saccharomyces cerevisiae (strain ATCC 204508 / S288c) GN=YOR059C PE=1 SV=1	204	83.1889	2.90225e-15	34.93	1	76	486	0	80	219
TRINITY_DN1391_c0_g1	1	2622	790	41.99	43.92	sp|Q8BLY2|SYTC2_MOUSE Probable threonine--tRNA ligase 2, cytoplasmic OS=Mus musculus GN=Tarsl2 PE=1 SV=1	1068	416.001	0	54.35	-3	239	1339	0	439	785
TRINITY_DN9343_c0_g1	1	2596	438	49.58	86.3	sp|P29717|EXG1_CANAL Glucan 1,3-beta-glucosidase OS=Candida albicans (strain SC5314 / ATCC MYA-2876) GN=XOG1 PE=1 SV=5	683	267.7	1.46399e-78	38.64	2	2	1288	0	58	435
TRINITY_DN5640_c0_g2	1	2548	1216	33.67	23.44	sp|Q52E49|RSE1_MAGO7 Pre-mRNA-splicing factor RSE1 OS=Magnaporthe oryzae (strain 70-15 / ATCC MYA-4617 / FGSC 8958) GN=RSE1 PE=3 SV=2	882	344.354	0	58.33	-2	1690	2547	0	487	771
TRINITY_DN9346_c0_g1	1	2506	292	26.82	77.74	sp|P32573|SPS19_YEAST Peroxisomal 2,4-dienoyl-CoA reductase SPS19 OS=Saccharomyces cerevisiae (strain ATCC 204508 / S288c) GN=SPS19 PE=1 SV=4	482	190.274	1.19171e-53	49.34	-1	161	832	0	59	285
TRINITY_DN7121_c0_g1	1	2462	773	53.61	56.66	sp|Q4PE39|SEC23_USTMA Protein transport protein SEC23 OS=Ustilago maydis (strain 521 / FGSC 9021) GN=SEC23 PE=3 SV=1	1928	747.273	0	83.41	-3	1141	2460	0	336	773
TRINITY_DN4281_c0_g1	1	2441	801	44.12	45.69	sp|Q1MTR3|VID27_SCHPO Vacuolar import and degradation protein 27 OS=Schizosaccharomyces pombe (strain 972 / ATCC 24843) GN=vid27 PE=1 SV=1	1036	403.675	6.20332e-126	51.64	1	1204	2280	0	436	801
TRINITY_DN8165_c0_g1	1	2404	286	30.95	82.17	sp|O60178|NTA1_SCHPO Protein N-terminal amidase OS=Schizosaccharomyces pombe (strain 972 / ATCC 24843) GN=nta1 PE=3 SV=1	270	108.612	3.03108e-24	29.77	-3	1221	1964	0	47	281
TRINITY_DN8630_c0_g1	1	2383	489	12.97	21.06	sp|Q4WMV5|FKBP4_ASPFU FK506-binding protein 4 OS=Neosartorya fumigata (strain ATCC MYA-4609 / Af293 / CBS 101355 / FGSC A1100) GN=fpr4 PE=3 SV=2	364	144.821	2.23359e-35	66.02	1	955	1263	0	386	488
TRINITY_DN9053_c1_g1	1	2360	745	46.02	44.56	sp|Q5AXT5|PIF1_EMENI ATP-dependent DNA helicase PIF1 OS=Emericella nidulans (strain FGSC A4 / ATCC 38163 / CBS 112.46 / NRRL 194 / M139) GN=pif1 PE=3 SV=2	653	256.144	4.67426e-72	41.53	-3	1273	2358	0	379	710
TRINITY_DN8342_c0_g1	1	2334	132	8.23	36.36	sp|Q9KD53|CDD_BACHD Cytidine deaminase OS=Bacillus halodurans (strain ATCC BAA-125 / DSM 18197 / FERM 7344 / JCM 9153 / C-125) GN=cdd PE=3 SV=1	141	58.9214	8.55141e-09	50	1	1705	1896	0	2	49
TRINITY_DN8533_c0_g4	1	2311	340	45.82	92.06	sp|Q09843|RFC2_SCHPO Replication factor C subunit 2 OS=Schizosaccharomyces pombe (strain 972 / ATCC 24843) GN=rfc2 PE=1 SV=1	937	365.54	9.83857e-118	53.26	-3	1209	2267	0	20	332
TRINITY_DN7425_c0_g2	1	2294	245	26.81	71.43	sp|O60573|IF4E2_HUMAN Eukaryotic translation initiation factor 4E type 2 OS=Homo sapiens GN=EIF4E2 PE=1 SV=1	274	110.153	4.25582e-25	33.17	1	697	1311	0	53	227
TRINITY_DN8152_c0_g1	1	2255	507	16.9	23.47	sp|Q4WRW0|SSH4_ASPFU Protein ssh4 OS=Neosartorya fumigata (strain ATCC MYA-4609 / Af293 / CBS 101355 / FGSC A1100) GN=ssh4 PE=3 SV=2	182	74.7146	1.33529e-12	36.22	-2	1235	1615	0	234	352
TRINITY_DN8768_c0_g1	1	2238	1406	47.45	18.28	sp|Q9W6V5|PTPRJ_CHICK Receptor-type tyrosine-protein phosphatase eta OS=Gallus gallus GN=PTPRJ PE=2 SV=2	259	104.375	1.76406e-21	27.25	1	283	1344	0	1137	1393
TRINITY_DN8825_c0_g1	1	2213	1721	17.08	8.6	sp|Q15811|ITSN1_HUMAN Intersectin-1 OS=Homo sapiens GN=ITSN1 PE=1 SV=3	160	66.2402	1.02295e-09	33.33	-3	760	1137	0	1085	1232
TRINITY_DN6420_c0_g1	1	2198	418	21.97	35.41	sp|P34480|NAGA_CAEEL N-acetylglucosamine-6-phosphate deacetylase OS=Caenorhabditis elegans GN=F59B2.3 PE=3 SV=1	253	102.064	1.20459e-34	39.39	3	741	1223	0	119	266
TRINITY_DN6657_c0_g1	1	2177	279	34.73	82.8	sp|Q92373|RFA2_SCHPO Replication factor A protein 2 OS=Schizosaccharomyces pombe (strain 972 / ATCC 24843) GN=ssb2 PE=1 SV=1	331	132.109	1.76106e-32	33.85	-1	1344	2099	0	42	272
TRINITY_DN6595_c0_g4	1	2158	437	30.17	49.66	sp|D4B5F9|PGDA_ARTBC Probable peptidoglycan-N-acetylglucosamine deacetylase ARB_03699 OS=Arthroderma benhamiae (strain ATCC MYA-4681 / CBS 112371) GN=ARB_03699 PE=1 SV=2	218	88.5817	2.90565e-17	33.94	2	1118	1768	0	138	354
TRINITY_DN1428_c0_g1	1	2130	368	10.42	21.2	sp|P25042|ROX1_YEAST Repressor ROX1 OS=Saccharomyces cerevisiae (strain ATCC 204508 / S288c) GN=ROX1 PE=1 SV=1	148	61.6178	9.00137e-09	42.31	-1	1093	1314	0	10	87
TRINITY_DN7829_c0_g1	1	2112	602	64.49	75.08	sp|Q14738|2A5D_HUMAN Serine/threonine-protein phosphatase 2A 56 kDa regulatory subunit delta isoform OS=Homo sapiens GN=PPP2R5D PE=1 SV=1	1597	619.772	0	64.4	2	143	1504	0	62	513
TRINITY_DN8966_c0_g1	1	2094	409	21.63	33.01	sp|Q5B6Q3|EXGB_EMENI Glucan endo-1,6-beta-glucosidase B OS=Emericella nidulans (strain FGSC A4 / ATCC 38163 / CBS 112.46 / NRRL 194 / M139) GN=exgB PE=2 SV=1	173	71.2478	3.63783e-16	32.26	-2	861	1313	0	126	260
TRINITY_DN5370_c0_g1	1	2076	156	12.86	66.03	sp|Q03667|MIX17_YEAST Mitochondrial intermembrane space cysteine motif-containing protein MIX17 OS=Saccharomyces cerevisiae (strain ATCC 204508 / S288c) GN=MIX17 PE=1 SV=1	208	84.7297	2.70886e-17	48.54	2	1649	1915	0	54	156
TRINITY_DN8372_c2_g1	1	2026	385	19.4	33.51	sp|P43567|AGX1_YEAST Alanine--glyoxylate aminotransferase 1 OS=Saccharomyces cerevisiae (strain ATCC 204508 / S288c) GN=AGX1 PE=1 SV=1	198	80.8777	2.53616e-32	38.24	2	1391	1783	0	234	362
TRINITY_DN8890_c0_g2	1	1998	576	50.3	57.12	sp|P27614|CBPS_YEAST Carboxypeptidase S OS=Saccharomyces cerevisiae (strain ATCC 204508 / S288c) GN=CPS1 PE=1 SV=2	531	209.149	3.38462e-77	35.8	-2	60	1064	0	246	574
TRINITY_DN5578_c0_g1	1	1982	565	13.32	16.46	sp|Q5BA81|EASD_EMENI Acyl-CoA ligase easD OS=Emericella nidulans (strain FGSC A4 / ATCC 38163 / CBS 112.46 / NRRL 194 / M139) GN=easD PE=3 SV=1	104	44.669	1.06905e-10	35.11	3	1323	1586	0	16	108
TRINITY_DN5210_c0_g4	1	1967	804	41.79	31.34	sp|Q95M18|ENPL_BOVIN Endoplasmin OS=Bos taurus GN=HSP90B1 PE=2 SV=1	477	188.348	4.68895e-74	38.04	2	242	1063	0	332	583
TRINITY_DN7076_c1_g1	1	1921	663	16.24	15.38	sp|Q57568|Y104_METJA Uncharacterized ATP-dependent helicase MJ0104 OS=Methanocaldococcus jannaschii (strain ATCC 43067 / DSM 2661 / JAL-1 / JCM 10045 / NBRC 100440) GN=MJ0104 PE=3 SV=1	190	77.7962	1.28043e-13	37.5	-1	170	481	0	536	637
TRINITY_DN7890_c0_g1	1	1906	502	49.11	61.55	sp|Q9USR2|UBP10_SCHPO Probable mRNA-splicing protein ubp10 OS=Schizosaccharomyces pombe (strain 972 / ATCC 24843) GN=ubp10 PE=3 SV=1	820	320.472	6.80303e-104	51.11	-2	970	1905	0	64	372
TRINITY_DN6333_c0_g1	1	1890	405	58.41	86.42	sp|O60020|ASPR1_PHARH Aspartic protease OS=Phaffia rhodozyma GN=pr1 PE=1 SV=1	599	235.343	1.11875e-68	38.93	2	539	1642	0	54	403
TRINITY_DN7567_c0_g1	1	1837	549	44.09	39.89	sp|O31826|YNGI_BACSU Putative acyl-CoA synthetase YngI OS=Bacillus subtilis (strain 168) GN=yngI PE=3 SV=1	389	154.451	5.74966e-55	32.72	-1	152	961	0	318	536
TRINITY_DN3394_c0_g2	1	1800	660	53.33	46.52	sp|Q5B8L0|PRTT_EMENI Transcriptional activator of proteases prtT OS=Emericella nidulans (strain FGSC A4 / ATCC 38163 / CBS 112.46 / NRRL 194 / M139) GN=prtT PE=3 SV=1	213	86.6557	1.9773e-16	24.55	3	243	1202	0	293	599
TRINITY_DN7636_c1_g6	1	1786	160	25.03	87.5	sp|P30176|RIBX_ECOLI N-glycosidase YbiA OS=Escherichia coli (strain K12) GN=ybiA PE=1 SV=1	172	70.8626	1.26881e-12	31.85	1	1030	1476	0	17	156
TRINITY_DN9811_c0_g1	1	1765	915	68.84	40	sp|Q9LSL9|PP445_ARATH Pentatricopeptide repeat-containing protein At5g65560 OS=Arabidopsis thaliana GN=At5g65560 PE=2 SV=1	265	106.686	1.24695e-22	21.73	1	103	1317	0	349	714
TRINITY_DN5975_c0_g1	1	1752	1088	26.71	14.25	sp|Q69UP6|AGO18_ORYSJ Protein argonaute 18 OS=Oryza sativa subsp. japonica GN=AGO18 PE=2 SV=1	367	145.976	3.55487e-56	50	-2	555	1022	0	900	1054
TRINITY_DN6916_c0_g2	1	1739	523	56.41	57.55	sp|P0DPB2|PSIT2_PSICU Major facilitor-type transporter psiT2 OS=Psilocybe cubensis GN=psiT2 PE=3 SV=1	255	102.834	2.16061e-22	26.22	-1	12	992	0	94	394
TRINITY_DN4036_c0_g1	1	1728	855	38.19	26.43	sp|Q54NA6|MYBL_DICDI Myb-like protein L OS=Dictyostelium discoideum GN=mybL PE=3 SV=1	300	120.168	5.18612e-27	33.91	1	580	1239	0	520	745
TRINITY_DN6563_c0_g1	1	1650	453	42	50.99	sp|Q7Z9Z2|TBG_COPC7 Tubulin gamma chain OS=Coprinopsis cinerea (strain Okayama-7 / 130 / ATCC MYA-4618 / FGSC 9003) GN=TUB4 PE=3 SV=1	1123	437.187	1.33591e-176	96.1	-3	944	1636	0	1	231
TRINITY_DN8252_c0_g1	1	1636	315	61.06	99.05	sp|Q7SAK9|SEN34_NEUCR Probable tRNA-splicing endonuclease subunit tsp-4 OS=Neurospora crassa (strain ATCC 24698 / 74-OR23-1A / CBS 708.71 / DSM 1257 / FGSC 987) GN=tsp-4 PE=3 SV=1	186	76.2554	6.71985e-14	27.2	2	35	1033	0	4	315
TRINITY_DN7650_c0_g1	1	1626	485	43.91	48.66	sp|P33284|HXK_KLULA Hexokinase OS=Kluyveromyces lactis (strain ATCC 8585 / CBS 2359 / DSM 70799 / NBRC 1267 / NRRL Y-1140 / WM37) GN=RAG5 PE=1 SV=3	599	235.343	1.26019e-68	49.79	2	911	1624	0	34	269
TRINITY_DN8670_c0_g1	1	1606	345	48.01	60.87	sp|P36163|OMA1_YEAST Mitochondrial metalloendopeptidase OMA1 OS=Saccharomyces cerevisiae (strain ATCC 204508 / S288c) GN=OMA1 PE=1 SV=2	290	116.316	3.11482e-27	28.74	-2	670	1440	0	105	314
TRINITY_DN7407_c0_g1	1	1557	803	61.66	39.98	sp|O74402|HSP78_SCHPO Heat shock protein 78, mitochondrial OS=Schizosaccharomyces pombe (strain 972 / ATCC 24843) GN=hsp78 PE=3 SV=1	1082	421.394	1.67711e-136	64.17	2	590	1549	0	89	409
TRINITY_DN7747_c1_g1	1	1549	659	30.79	23.98	sp|P28829|BYR2_SCHPO Protein kinase byr2 OS=Schizosaccharomyces pombe (strain 972 / ATCC 24843) GN=byr2 PE=1 SV=1	558	219.55	1.23817e-61	67.3	-2	4	480	0	391	548
TRINITY_DN2941_c0_g1	1	1541	393	32.71	41.48	sp|Q03730|YMB8_YEAST Uncharacterized vacuolar membrane protein YML018C OS=Saccharomyces cerevisiae (strain ATCC 204508 / S288c) GN=YML018C PE=1 SV=1	334	133.265	8.01235e-33	43.2	3	933	1436	0	226	388
TRINITY_DN2449_c0_g1	1	1531	317	10.97	17.67	sp|Q12145|YP013_YEAST Zinc finger protein YPR013C OS=Saccharomyces cerevisiae (strain ATCC 204508 / S288c) GN=YPR013C PE=1 SV=1	174	71.633	2.28873e-12	53.57	-1	179	346	0	251	306
TRINITY_DN8870_c0_g3	1	1512	361	41.87	47.92	sp|Q9UR19|VPL1_PLEER Versatile peroxidase VPL1 OS=Pleurotus eryngii GN=vpl1 PE=1 SV=1	650	254.988	6.50981e-78	65.88	-3	878	1510	0	89	261
TRINITY_DN8267_c0_g1	1	1502	403	44.14	54.84	sp|P0CR48|CSN12_CRYNJ Protein CSN12 homolog OS=Cryptococcus neoformans var. neoformans serotype D (strain JEC21 / ATCC MYA-565) GN=CSN12 PE=3 SV=1	583	229.18	1.15715e-67	46.61	3	774	1436	0	179	399
TRINITY_DN6956_c0_g3	1	1492	307	42.23	53.75	sp|M2SNN6|LAEA_COCH5 Secondary metabolism regulator LAE1 OS=Cochliobolus heterostrophus (strain C5 / ATCC 48332 / race O) GN=LAE1 PE=3 SV=1	192	78.5666	9.19555e-15	29.91	2	74	703	0	12	176
TRINITY_DN3127_c0_g3	1	1472	911	46.47	22.39	sp|Q23629|DHTK1_CAEEL Probable 2-oxoglutarate dehydrogenase E1 component DHKTD1 homolog, mitochondrial OS=Caenorhabditis elegans GN=ogdh-2 PE=3 SV=4	389	154.451	1.64331e-38	39.47	-2	2	685	0	51	254
TRINITY_DN7531_c0_g2	1	1462	349	28.52	40.11	sp|P53199|ERG26_YEAST Sterol-4-alpha-carboxylate 3-dehydrogenase, decarboxylating OS=Saccharomyces cerevisiae (strain ATCC 204508 / S288c) GN=ERG26 PE=1 SV=1	218	88.5817	7.93094e-39	39.72	1	685	1101	0	187	326
TRINITY_DN2876_c0_g1	1	1449	408	30.02	34.07	sp|Q54NS9|AIFA_DICDI Apoptosis-inducing factor homolog A OS=Dictyostelium discoideum GN=aifA PE=3 SV=1	186	76.2554	6.66936e-28	33.77	2	203	637	0	44	182
TRINITY_DN1324_c0_g1	1	1440	596	74.58	60.23	sp|P38090|AGP2_YEAST General amino acid permease AGP2 OS=Saccharomyces cerevisiae (strain ATCC 204508 / S288c) GN=AGP2 PE=1 SV=1	881	343.969	1.37413e-109	48.35	2	32	1105	0	209	567
TRINITY_DN9042_c1_g5	1	1429	610	82.51	69.51	sp|O74314|MET7_SCHPO Probable cystathionine gamma-synthase OS=Schizosaccharomyces pombe (strain 972 / ATCC 24843) GN=SPBC15D4.09c PE=3 SV=1	729	285.419	4.25019e-87	43.02	-1	2	1180	0	15	438
TRINITY_DN3710_c0_g1	1	1421	226	39.27	77.88	sp|Q7RTV5|AAED1_HUMAN Thioredoxin-like protein AAED1 OS=Homo sapiens GN=AAED1 PE=2 SV=1	217	88.1965	2.2051e-18	26.88	-3	514	1071	0	37	212
TRINITY_DN9393_c0_g1	1	1409	340	81.55	99.41	sp|Q3MI00|DNJB1_BOVIN DnaJ homolog subfamily B member 1 OS=Bos taurus GN=DNAJB1 PE=2 SV=3	441	174.481	4.40631e-48	33.94	2	137	1285	0	1	338
TRINITY_DN7520_c0_g1	1	1368	368	39.25	44.84	sp|Q9H841|NPAL2_HUMAN NIPA-like protein 2 OS=Homo sapiens GN=NIPAL2 PE=2 SV=1	167	68.9366	5.54176e-25	30.17	1	10	546	0	82	246
TRINITY_DN5889_c0_g4	1	1341	229	36.69	84.72	sp|Q01387|RAS2_NEUCR Protein ras-2 OS=Neurospora crassa (strain ATCC 24698 / 74-OR23-1A / CBS 708.71 / DSM 1257 / FGSC 987) GN=ras-2 PE=3 SV=2	435	172.17	9.55596e-49	47.94	1	538	1029	0	36	229
TRINITY_DN7753_c0_g1	1	1332	442	27.93	28.05	sp|G4NEE4|VELC_MAGO7 Sexual development regulator VELC OS=Magnaporthe oryzae (strain 70-15 / ATCC MYA-4617 / FGSC 8958) GN=VELC PE=3 SV=1	158	65.4698	3.2004e-10	32.54	-3	806	1177	0	218	341
TRINITY_DN8461_c0_g1	1	1325	579	80.83	59.41	sp|Q9DC48|PRP17_MOUSE Pre-mRNA-processing factor 17 OS=Mus musculus GN=Cdc40 PE=2 SV=1	692	271.166	1.33019e-100	42.22	-3	244	1314	0	67	410
TRINITY_DN6148_c0_g2	1	1294	326	60.05	77.91	sp|P40531|GVP36_YEAST Protein GVP36 OS=Saccharomyces cerevisiae (strain ATCC 204508 / S288c) GN=GVP36 PE=1 SV=1	284	114.005	5.262e-27	32.69	-3	408	1184	0	34	287
TRINITY_DN4701_c0_g1	1	1287	578	20.05	14.53	sp|Q96AP4|ZUFSP_HUMAN Zinc finger with UFM1-specific peptidase domain protein OS=Homo sapiens GN=ZUFSP PE=1 SV=1	168	69.3218	2.81275e-11	39.08	1	28	285	0	355	438
TRINITY_DN5374_c0_g1	1	1261	464	35.45	31.9	sp|O74799|EXG3_SCHPO Glucan 1,3-beta-glucosidase 3 OS=Schizosaccharomyces pombe (strain 972 / ATCC 24843) GN=exg3 PE=3 SV=1	138	57.7658	2.67896e-18	28.39	-1	476	922	0	209	356
TRINITY_DN3104_c0_g1	1	1247	167	25.26	57.49	sp|P62972|UBIQP_XENLA Polyubiquitin (Fragment) OS=Xenopus laevis PE=1 SV=2	120	50.8322	2.93264e-06	28.57	-1	606	920	0	68	163
TRINITY_DN4649_c0_g1	1	1240	275	22.02	33.82	sp|O14415|SEC65_CANAX Signal recognition particle SEC65 subunit OS=Candida albicans GN=SEC65 PE=3 SV=1	208	84.7297	3.7135e-17	43.62	2	368	640	0	93	185
TRINITY_DN4679_c0_g3	1	1232	510	13.15	10.78	sp|W7MS01|FUB3_GIBM7 Aspartate kinase FUB3 OS=Gibberella moniliformis (strain M3125 / FGSC 7600) GN=FUB3 PE=1 SV=1	110	46.9802	1.91262e-14	54.55	-1	234	395	0	213	267
TRINITY_DN6019_c0_g4	1	1224	2085	85.78	17.41	sp|G0SA56|MLP1_CHATD Protein MLP1 homolog OS=Chaetomium thermophilum (strain DSM 1495 / CBS 144.50 / IMI 039719) GN=MLP1 PE=3 SV=1	333	132.88	1.55048e-31	29.57	2	170	1219	0	497	859
TRINITY_DN6861_c0_g1	1	1217	608	60.39	40.46	sp|O94268|NOP2_SCHPO 25S rRNA (cytosine-C(5))-methyltransferase nop2 OS=Schizosaccharomyces pombe (strain 972 / ATCC 24843) GN=nop2 PE=1 SV=1	982	382.874	1.52712e-125	74.8	3	483	1217	0	190	435
TRINITY_DN2946_c0_g2	1	1190	471	78.91	66.67	sp|A8NAN2|ARGJ_COPC7 Arginine biosynthesis bifunctional protein ArgJ, mitochondrial OS=Coprinopsis cinerea (strain Okayama-7 / 130 / ATCC MYA-4618 / FGSC 9003) GN=CC1G_08401 PE=3 SV=1	1268	493.041	1.18414e-170	77.29	-3	1	939	0	25	338
TRINITY_DN4012_c0_g1	1	1183	388	51.99	50	sp|Q12624|GUN3_HUMIN Endoglucanase 3 OS=Humicola insolens GN=CMC3 PE=1 SV=1	382	151.754	5.376e-40	41.95	-3	42	656	0	14	207
TRINITY_DN6561_c0_g2	1	1175	453	97.79	78.15	sp|Q10181|YAW6_SCHPO Uncharacterized protein C3F10.06c OS=Schizosaccharomyces pombe (strain 972 / ATCC 24843) GN=SPAC3F10.06c PE=4 SV=1	345	137.502	1.18383e-34	30.77	1	1	1149	0	98	451
TRINITY_DN4141_c0_g1	1	1136	372	59.95	58.87	sp|Q10488|ETR1_SCHPO Enoyl-[acyl-carrier-protein] reductase, mitochondrial OS=Schizosaccharomyces pombe (strain 972 / ATCC 24843) GN=etr1 PE=3 SV=1	400	158.688	2.71645e-54	41.92	-2	455	1135	0	30	248
TRINITY_DN5514_c0_g1	1	1128	170	7.98	17.65	sp|Q7PCJ8|SAT2_BOVIN Diamine acetyltransferase 2 OS=Bos taurus GN=SAT2 PE=2 SV=1	88	38.5058	7.35731e-07	56.67	2	614	703	0	91	120
TRINITY_DN1375_c0_g1	1	1114	297	83.21	96.63	sp|O74741|DIOXL_SCHPO 4,5-DOPA dioxygenase extradiol-like protein OS=Schizosaccharomyces pombe (strain 972 / ATCC 24843) GN=SPBC1709.16c PE=3 SV=2	573	225.328	5.62158e-69	42.26	2	131	1057	0	9	295
TRINITY_DN3792_c0_g2	1	1092	490	65.11	38.57	sp|P61422|THIED_GEOSL Thiamine biosynthesis bifunctional protein ThiED OS=Geobacter sulfurreducens (strain ATCC 51573 / DSM 12127 / PCA) GN=thiDE PE=3 SV=1	283	113.62	5.11702e-36	34.45	3	354	1064	0	293	481
TRINITY_DN5889_c0_g2	1	1078	455	12.24	9.67	sp|O94548|MTC1_SCHPO Maintenance of telomere capping protein 1 OS=Schizosaccharomyces pombe (strain 972 / ATCC 24843) GN=SPCC1322.09 PE=3 SV=1	117	49.6766	1.21799e-07	43.18	3	945	1076	0	198	241
TRINITY_DN8260_c1_g1	1	1071	257	40.62	55.64	sp|P87216|VIPI_SCHPO Protein vip1 OS=Schizosaccharomyces pombe (strain 972 / ATCC 24843) GN=vip1 PE=1 SV=1	129	54.299	1.23746e-18	28.85	3	546	980	0	102	244
TRINITY_DN2757_c0_g3	1	1065	1421	93.8	24.91	sp|J9VXM5|CHS3_CRYNH Chitin synthase 3 OS=Cryptococcus neoformans var. grubii serotype A (strain H99 / ATCC 208821 / CBS 10515 / FGSC 9487) GN=CHS3 PE=1 SV=1	818	319.701	4.69861e-97	47.09	3	66	1064	0	71	424
TRINITY_DN5224_c0_g1	1	1058	591	45.37	24.03	sp|Q12362|RIB2_YEAST Bifunctional protein RIB2 OS=Saccharomyces cerevisiae (strain ATCC 204508 / S288c) GN=RIB2 PE=1 SV=1	294	117.857	9.81802e-28	45.4	1	31	510	0	435	576
TRINITY_DN7771_c0_g1	1	1052	213	43.06	63.38	sp|P36863|YPTV4_VOLCA GTP-binding protein yptV4 OS=Volvox carteri GN=YPTV4 PE=3 SV=1	376	149.443	3.43278e-41	50	3	462	914	0	60	194
TRINITY_DN3753_c0_g3	1	1048	1536	90.74	20.9	sp|Q06625|GDE_YEAST Glycogen debranching enzyme OS=Saccharomyces cerevisiae (strain ATCC 204508 / S288c) GN=GDB1 PE=1 SV=1	645	253.062	2.4058e-73	42.41	2	92	1042	0	655	975
TRINITY_DN6258_c0_g1	1	1043	609	83.7	47.78	sp|Q92372|RFA1_SCHPO Replication factor A protein 1 OS=Schizosaccharomyces pombe (strain 972 / ATCC 24843) GN=ssb1 PE=1 SV=1	751	293.893	4.55285e-92	45.89	-2	170	1042	0	317	607
TRINITY_DN6196_c0_g1	1	1024	629	75.88	41.65	sp|Q4PIF8|FER1_USTMA Iron multicopper oxidase fer1 OS=Ustilago maydis (strain 521 / FGSC 9021) GN=fer1 PE=2 SV=1	583	229.18	1.97761e-67	47.73	-3	225	1001	0	352	613
TRINITY_DN8352_c0_g2	1	1018	590	9.72	5.59	sp|O14035|YEME_SCHPO Uncharacterized permease C29B12.14c OS=Schizosaccharomyces pombe (strain 972 / ATCC 24843) GN=SPAC29B12.14c PE=3 SV=2	96	41.5874	8.12304e-06	48.48	1	118	216	0	377	409
TRINITY_DN6514_c0_g1	1	1007	175	47.67	92	sp|Q05776|UPS1_YEAST Protein UPS1, mitochondrial OS=Saccharomyces cerevisiae (strain ATCC 204508 / S288c) GN=UPS1 PE=1 SV=1	319	127.487	1.62092e-33	38.51	-1	330	809	0	11	171
TRINITY_DN1400_c0_g1	1	1002	313	29.34	31.63	sp|Q6DHU4|PR38A_DANRE Pre-mRNA-splicing factor 38A OS=Danio rerio GN=prpf38a PE=2 SV=1	330	131.724	8.52975e-45	64.65	2	23	316	0	1	99
TRINITY_DN2371_c0_g3	1	995	865	86.23	32.95	sp|O43022|YGV8_SCHPO Uncharacterized protein C354.08c OS=Schizosaccharomyces pombe (strain 972 / ATCC 24843) GN=SPBC354.08c PE=3 SV=1	200	81.6481	9.73647e-16	23.13	2	11	868	0	293	577
TRINITY_DN4719_c0_g1	1	982	499	69.96	43.29	sp|Q9US44|YIZG_SCHPO Uncharacterized transporter C1002.16c OS=Schizosaccharomyces pombe (strain 972 / ATCC 24843) GN=SPAC1002.16c PE=3 SV=1	267	107.457	1.8722e-28	29.24	-3	63	749	0	176	391
TRINITY_DN2359_c0_g1	1	976	351	52.25	46.15	sp|A4FUB8|TM115_BOVIN Transmembrane protein 115 OS=Bos taurus GN=TMEM115 PE=2 SV=1	128	53.9138	1.44446e-09	26.86	2	5	514	0	74	235
TRINITY_DN425_c0_g1	1	972	1036	85.8	24.9	sp|A0A0D2YG01|FUB8_FUSO4 Non-canonical non-ribosomal peptide synthetase FUB8 OS=Fusarium oxysporum f. sp. lycopersici (strain 4287 / CBS 123668 / FGSC 9935 / NRRL 34936) GN=FUB8 PE=1 SV=1	305	122.094	9.90635e-29	34.28	-1	1	834	0	568	825
TRINITY_DN6594_c1_g1	1	942	1049	21.66	6.48	sp|O13824|NMD2_SCHPO Nonsense-mediated mRNA decay protein 2 OS=Schizosaccharomyces pombe (strain 972 / ATCC 24843) GN=upf2 PE=1 SV=1	184	75.485	3.52873e-15	48.53	1	283	486	0	35	102
TRINITY_DN7468_c0_g3	1	938	184	57.89	68.48	sp|P87068|ATG8_LACBI Autophagy-related protein 8 OS=Laccaria bicolor GN=ATG8 PE=2 SV=2	465	183.726	4.24105e-55	59.12	-3	331	873	0	1	126
TRINITY_DN2602_c0_g1	1	911	301	89.9	86.71	sp|O74754|ATPG_SCHPO ATP synthase subunit gamma, mitochondrial OS=Schizosaccharomyces pombe (strain 972 / ATCC 24843) GN=atp3 PE=3 SV=1	637	249.98	2.40329e-79	46.35	-3	1	819	0	32	292
TRINITY_DN1816_c0_g2	1	899	491	99.78	53.56	sp|A0A0U2UXG3|ITP1_USTMD Itaconate transport protein OS=Ustilago maydis GN=ITP1 PE=3 SV=1	338	134.806	2.33579e-34	34.87	-3	1	897	0	132	394
TRINITY_DN7195_c1_g1	1	894	1337	52.01	11.67	sp|P87136|YDM5_SCHPO Uncharacterized protein C57A7.05 OS=Schizosaccharomyces pombe (strain 972 / ATCC 24843) GN=SPAC57A7.05 PE=4 SV=1	198	80.8777	5.8864e-31	37.18	1	1	465	0	1058	1213
TRINITY_DN6884_c0_g4	1	890	398	81.24	54.02	sp|Q6AYT7|ABD12_RAT Monoacylglycerol lipase ABHD12 OS=Rattus norvegicus GN=Abhd12 PE=2 SV=1	291	116.701	2.70058e-28	33.47	-3	7	729	0	76	290
TRINITY_DN2665_c0_g1	1	884	469	99.77	61.83	sp|O74932|TPS1_YARLI Alpha,alpha-trehalose-phosphate synthase [UDP-forming] OS=Yarrowia lipolytica (strain CLIB 122 / E 150) GN=TPS1 PE=2 SV=1	647	253.832	5.54215e-79	44.19	-2	2	883	0	136	425
TRINITY_DN6875_c0_g2	1	874	136	57.67	91.18	sp|Q4PB04|H32_USTMA Histone H3.2 OS=Ustilago maydis (strain 521 / FGSC 9021) GN=HHT2 PE=3 SV=3	553	217.624	3.41166e-69	70.24	-1	314	817	0	1	124
TRINITY_DN7893_c0_g2	1	849	602	44.17	24.42	sp|Q5RFE9|LRC40_PONAB Leucine-rich repeat-containing protein 40 OS=Pongo abelii GN=LRRC40 PE=2 SV=1	120	50.8322	6.5261e-06	31.54	2	413	787	0	454	600
TRINITY_DN6325_c0_g2	1	810	435	21.48	13.56	sp|Q08760|RAX1_YEAST Bud site selection protein RAX1 OS=Saccharomyces cerevisiae (strain ATCC 204508 / S288c) GN=RAX1 PE=1 SV=1	148	61.6178	1.58975e-09	52.54	-1	460	633	0	21	79
TRINITY_DN6859_c0_g2	1	806	555	80.77	37.48	sp|P34913|HYES_HUMAN Bifunctional epoxide hydrolase 2 OS=Homo sapiens GN=EPHX2 PE=1 SV=2	144	60.077	5.66196e-09	25.89	-1	156	806	0	336	543
TRINITY_DN6086_c0_g1	1	792	1469	95.83	14.77	sp|Q9P7V2|ABC4_SCHPO ATP-binding cassette transporter abc4 OS=Schizosaccharomyces pombe (strain 972 / ATCC 24843) GN=abc4 PE=3 SV=1	396	157.147	3.12987e-41	38.22	2	2	760	0	542	758
TRINITY_DN2267_c0_g2	1	787	821	19.06	6.09	sp|Q9Y7N9|YCKC_SCHPO PX domain-containing protein C1450.12 OS=Schizosaccharomyces pombe (strain 972 / ATCC 24843) GN=SPCC1450.12 PE=1 SV=1	140	58.5362	1.67988e-08	50	1	10	159	0	611	660
TRINITY_DN4896_c0_g1	1	782	496	27.62	14.52	sp|Q9NES8|PPP5_CAEEL Serine/threonine-protein phosphatase 5 OS=Caenorhabditis elegans GN=pph-5 PE=1 SV=2	221	89.7373	1.4695e-33	52.78	-2	317	532	0	379	450
TRINITY_DN61_c0_g1	1	773	188	62.87	86.17	sp|P38264|PHO88_YEAST SRP-independent targeting protein 3 OS=Saccharomyces cerevisiae (strain ATCC 204508 / S288c) GN=PHO88 PE=1 SV=1	386	153.295	4.6265e-44	48.15	-3	250	735	0	1	162
TRINITY_DN3076_c0_g3	1	748	1900	93.85	12.53	sp|P37297|STT4_YEAST Phosphatidylinositol 4-kinase STT4 OS=Saccharomyces cerevisiae (strain ATCC 204508 / S288c) GN=STT4 PE=1 SV=1	222	90.1225	1.23032e-18	26.45	-2	13	714	0	1041	1278
TRINITY_DN7871_c1_g4	1	738	475	59.35	30.74	sp|Q10478|SAM50_SCHPO SAM50-like protein SPAC17C9.06 OS=Schizosaccharomyces pombe (strain 972 / ATCC 24843) GN=SPAC17C9.06 PE=3 SV=1	285	114.39	9.219e-28	40.82	1	22	459	0	330	475
TRINITY_DN9344_c1_g1	1	733	967	67.53	21.1	sp|O14111|PSD3_SCHPO Phosphatidylserine decarboxylase proenzyme 3 OS=Schizosaccharomyces pombe (strain 972 / ATCC 24843) GN=psd3 PE=3 SV=2	258	103.99	2.08354e-23	31.86	1	61	555	0	282	485
TRINITY_DN3805_c0_g1	1	708	341	73.73	48.68	sp|Q12230|LSP1_YEAST Sphingolipid long chain base-responsive protein LSP1 OS=Saccharomyces cerevisiae (strain ATCC 204508 / S288c) GN=LSP1 PE=1 SV=1	128	53.9138	3.24636e-07	26.55	-1	10	531	0	47	212
TRINITY_DN3949_c0_g1	1	704	139	52.41	88.49	sp|Q9HGX4|H2A_AGABI Histone H2A OS=Agaricus bisporus PE=2 SV=3	447	176.792	4.89158e-54	85.37	2	221	589	0	17	139
TRINITY_DN8224_c0_g1	1	695	590	80.72	31.86	sp|P15710|PHO4_NEUCR Phosphate-repressible phosphate permease pho-4 OS=Neurospora crassa (strain ATCC 24698 / 74-OR23-1A / CBS 708.71 / DSM 1257 / FGSC 987) GN=pho-4 PE=1 SV=1	568	223.402	4.6404e-67	55.85	-1	132	692	0	399	586
TRINITY_DN938_c0_g1	1	674	168	30.27	40.48	sp|Q6DBY2|NAA50_DANRE N-alpha-acetyltransferase 50 OS=Danio rerio GN=naa50 PE=1 SV=1	157	65.0846	5.4082e-12	41.18	-3	469	672	0	83	150
TRINITY_DN1750_c0_g1	1	662	1115	31.27	4.75	sp|Q9HGE0|FUM6_GIBM7 Bifunctional cytochrome P450/NADPH--P450 reductase OS=Gibberella moniliformis (strain M3125 / FGSC 7600) GN=FUM6 PE=2 SV=1	109	46.595	1.71816e-14	34.78	-3	172	378	0	120	172
TRINITY_DN3300_c0_g1	1	640	2699	89.53	7	sp|Q6LA55|YF49_SCHPO UPF0648 protein C3H5.09c OS=Schizosaccharomyces pombe (strain 972 / ATCC 24843) GN=SPAC3H5.09c PE=3 SV=2	158	65.4698	5.31131e-11	27.41	-2	25	597	0	2058	2246
TRINITY_DN8617_c0_g3	1	623	63	30.34	98.41	sp|P48011|RPAB4_SCHPO DNA-directed RNA polymerases I, II, and III subunit RPABC4 OS=Schizosaccharomyces pombe (strain 972 / ATCC 24843) GN=rpc10 PE=1 SV=2	225	91.2781	2.52346e-22	68.25	3	117	305	0	2	63
TRINITY_DN8322_c0_g2	1	620	843	28.06	6.88	sp|Q00578|RAD25_YEAST DNA repair helicase RAD25 OS=Saccharomyces cerevisiae (strain ATCC 204508 / S288c) GN=SSL2 PE=1 SV=1	235	95.1301	7.68925e-21	70.69	-3	79	252	0	109	166
TRINITY_DN1902_c0_g1	1	597	308	55.78	36.36	sp|Q4P7G1|EIF3G_USTMA Eukaryotic translation initiation factor 3 subunit G OS=Ustilago maydis (strain 521 / FGSC 9021) GN=TIF35 PE=3 SV=1	332	132.494	1.43838e-35	67.86	-3	188	520	0	196	307
TRINITY_DN4431_c0_g1	1	590	174	50.85	56.32	sp|Q5D018|RBM8A_DANRE RNA-binding protein 8A OS=Danio rerio GN=rbm8a PE=2 SV=1	337	134.42	1.09236e-37	67	-3	154	453	0	54	151
TRINITY_DN7473_c0_g1	1	586	518	58.87	23.36	sp|P38861|NMD3_YEAST 60S ribosomal export protein NMD3 OS=Saccharomyces cerevisiae (strain ATCC 204508 / S288c) GN=NMD3 PE=1 SV=3	367	145.976	1.79701e-48	52.89	-3	201	545	0	1	121
TRINITY_DN3448_c0_g1	1	583	230	35.51	29.13	sp|Q06AB3|UCHL3_PIG Ubiquitin carboxyl-terminal hydrolase isozyme L3 OS=Sus scrofa GN=UCHL3 PE=2 SV=1	162	67.0106	1.58952e-12	44.93	-1	2	208	0	40	106
TRINITY_DN8575_c3_g2	1	575	528	98.09	36.17	sp|B8NHY4|ORDA_ASPFN O-methylsterigmatocystin oxidoreductase OS=Aspergillus flavus (strain ATCC 200026 / FGSC A1120 / NRRL 3357 / JCM 12722 / SRRC 167) GN=ordA PE=2 SV=1	353	140.584	1.24357e-37	38.74	-1	12	575	0	173	363
TRINITY_DN1598_c0_g1	1	567	214	52.38	50.93	sp|Q18938|MAAI_CAEEL Probable maleylacetoacetate isomerase OS=Caenorhabditis elegans GN=gst-42 PE=1 SV=1	122	51.6026	4.4681e-07	30	-1	253	549	0	62	170
TRINITY_DN3637_c0_g1	1	560	1152	50.36	6.94	sp|P0CR70|SPT5_CRYNJ Transcription elongation factor SPT5 OS=Cryptococcus neoformans var. neoformans serotype D (strain JEC21 / ATCC MYA-565) GN=SPT5 PE=3 SV=1	151	62.7734	2.92682e-10	47.42	3	162	443	0	824	903
TRINITY_DN5150_c0_g2	1	553	752	99.82	20.35	sp|P43535|GCN20_YEAST Protein GCN20 OS=Saccharomyces cerevisiae (strain ATCC 204508 / S288c) GN=GCN20 PE=1 SV=1	464	183.341	1.60674e-52	48.37	-2	1	552	0	523	675
TRINITY_DN6651_c0_g2	1	542	472	53.69	19.92	sp|Q09877|SIF3_SCHPO Sad1-interacting factor 3 OS=Schizosaccharomyces pombe (strain 972 / ATCC 24843) GN=sif3 PE=1 SV=2	149	62.003	3.23266e-10	34.02	-2	5	295	0	86	179
TRINITY_DN4735_c0_g1	1	510	339	58.24	29.5	sp|O74959|YJCD_SCHPO Uncharacterized oxidoreductase C736.13 OS=Schizosaccharomyces pombe (strain 972 / ATCC 24843) GN=SPCC736.13 PE=3 SV=1	158	65.4698	9.65326e-12	44	2	101	397	0	30	129
TRINITY_DN1019_c0_g1	1	507	572	30.77	9.09	sp|A1CFM2|PATO_ASPCL FAD-linked oxidoreductase patO OS=Aspergillus clavatus (strain ATCC 1007 / CBS 513.65 / DSM 816 / NCTC 3887 / NRRL 1) GN=patO PE=1 SV=1	118	50.0618	9.90855e-12	42.31	-3	35	190	0	515	566
TRINITY_DN523_c0_g1	1	504	164	88.69	90.85	sp|P87130|TIM17_SCHPO Mitochondrial import inner membrane translocase subunit tim17 OS=Schizosaccharomyces pombe (strain 972 / ATCC 24843) GN=tim17 PE=3 SV=1	407	161.384	1.32389e-48	64.43	-1	1	447	0	1	149
TRINITY_DN7292_c0_g1	1	473	323	82.45	33.75	sp|J9MJK9|TAL1_FUSO4 Transaldolase OS=Fusarium oxysporum f. sp. lycopersici (strain 4287 / CBS 123668 / FGSC 9935 / NRRL 34936) GN=FOXG_03074 PE=1 SV=1	360	143.28	3.59259e-40	60	-1	9	398	0	1	109
TRINITY_DN2660_c0_g1	1	455	584	98.24	25.17	sp|O59736|LEU1_SCHPO 2-isopropylmalate synthase OS=Schizosaccharomyces pombe (strain 972 / ATCC 24843) GN=leu3 PE=3 SV=2	431	170.629	8.21531e-49	56.38	-1	3	449	0	117	263
TRINITY_DN2344_c0_g2	1	449	446	39.42	13.23	sp|Q12726|HOSM_YARLI Homocitrate synthase, mitochondrial OS=Yarrowia lipolytica (strain CLIB 122 / E 150) GN=LYS1 PE=3 SV=1	200	81.6481	2.77916e-17	61.02	3	3	179	0	363	421
TRINITY_DN6117_c0_g1	1	441	105	33.33	46.67	sp|P0CM28|ATG12_CRYNJ Ubiquitin-like protein ATG12 OS=Cryptococcus neoformans var. neoformans serotype D (strain JEC21 / ATCC MYA-565) GN=ATG12 PE=3 SV=1	145	60.4622	1.79711e-15	55.1	-1	241	387	0	20	68
TRINITY_DN8817_c0_g3	1	417	776	73.38	13.14	sp|Q9WTX6|CUL1_MOUSE Cullin-1 OS=Mus musculus GN=Cul1 PE=1 SV=1	316	126.331	1.14615e-32	55.88	-2	111	416	0	675	776
TRINITY_DN3686_c0_g1	1	380	1557	98.68	7.64	sp|Q54FF3|GEFK_DICDI Ras guanine nucleotide exchange factor K OS=Dictyostelium discoideum GN=gefK PE=2 SV=1	148	61.6178	2.70837e-10	35.43	1	4	378	0	1349	1467
TRINITY_DN5289_c0_g1	1	368	746	92.93	14.34	sp|P48365|GYP7_YEAST GTPase-activating protein GYP7 OS=Saccharomyces cerevisiae (strain ATCC 204508 / S288c) GN=GYP7 PE=1 SV=1	312	124.79	2.53565e-32	55.26	3	21	362	0	501	607
TRINITY_DN415_c0_g1	1	344	413	56.69	15.98	sp|O74885|YQE1_SCHPO Putative dioxygenase C576.01c OS=Schizosaccharomyces pombe (strain 972 / ATCC 24843) GN=SPCC576.01c PE=3 SV=2	150	62.3882	4.97972e-11	42.42	-1	18	212	0	50	115
TRINITY_DN634_c0_g1	1	321	565	94.39	17.52	sp|P40375|MAOX_SCHPO NAD-dependent malic enzyme OS=Schizosaccharomyces pombe (strain 972 / ATCC 24843) GN=mae2 PE=1 SV=1	301	120.553	1.29201e-31	55.45	-3	14	316	0	233	331
TRINITY_DN10299_c0_g1	1	312	681	48.08	7.34	sp|O54781|SRPK2_MOUSE SRSF protein kinase 2 OS=Mus musculus GN=Srpk2 PE=1 SV=2	117	49.6766	1.34714e-06	44	-3	128	277	0	56	105
TRINITY_DN3531_c0_g1	1	307	487	44.95	9.45	sp|Q6P312|ALG11_XENTR GDP-Man:Man(3)GlcNAc(2)-PP-Dol alpha-1,2-mannosyltransferase OS=Xenopus tropicalis GN=alg11 PE=2 SV=1	134	56.225	1.02725e-14	50	-2	1	138	0	69	114
TRINITY_DN2299_c0_g1	1	299	382	50.17	13.09	sp|O74446|SIF2_SCHPO Sad1-interacting factor 2 OS=Schizosaccharomyces pombe (strain 972 / ATCC 24843) GN=sif2 PE=1 SV=2	153	63.5438	1.48868e-11	60	-3	85	234	0	307	356
TRINITY_DN3142_c0_g2	1	297	499	73.74	14.63	sp|Q9US44|YIZG_SCHPO Uncharacterized transporter C1002.16c OS=Schizosaccharomyces pombe (strain 972 / ATCC 24843) GN=SPAC1002.16c PE=3 SV=1	128	53.9138	3.64673e-08	32.88	2	71	289	0	345	417
TRINITY_DN2522_c0_g1	1	294	703	95.92	13.37	sp|O74438|MCP2_SCHPO Meiotic coiled-coil protein 2 OS=Schizosaccharomyces pombe (strain 972 / ATCC 24843) GN=mcp2 PE=4 SV=1	122	51.6026	2.39899e-07	27.66	-1	1	282	0	587	680
TRINITY_DN8104_c0_g2	1	292	215	86.3	39.07	sp|P38624|PSB1_YEAST Proteasome subunit beta type-1 OS=Saccharomyces cerevisiae (strain ATCC 204508 / S288c) GN=PRE3 PE=1 SV=2	352	140.198	6.80185e-41	76.19	-2	1	252	0	1	84
TRINITY_DN4697_c0_g1	1	275	708	86.18	11.02	sp|P97878|EXOC5_RAT Exocyst complex component 5 OS=Rattus norvegicus GN=Exoc5 PE=1 SV=1	150	62.3882	4.51443e-11	36.71	1	28	264	0	553	630
TRINITY_DN2103_c0_g5	1	262	808	79.01	8.54	sp|O14255|GCS1_SCHPO Probable mannosyl-oligosaccharide glucosidase OS=Schizosaccharomyces pombe (strain 972 / ATCC 24843) GN=SPAC6G10.09 PE=3 SV=1	213	86.6557	1.89528e-19	55.07	-3	54	260	0	740	808
TRINITY_DN7387_c0_g2	1	257	180	82.88	27.78	sp|Q9UST2|IMP2L_SCHPO Mitochondrial inner membrane protease subunit 2 OS=Schizosaccharomyces pombe (strain 972 / ATCC 24843) GN=SPBC336.13c PE=3 SV=1	121	51.2174	4.18269e-08	39.44	2	2	214	0	90	139
TRINITY_DN10290_c0_g1	1	211	552	99.53	12.68	sp|Q6BU46|SYNC_DEBHA Asparagine--tRNA ligase, cytoplasmic OS=Debaryomyces hansenii (strain ATCC 36239 / CBS 767 / JCM 1990 / NBRC 0083 / IGC 2968) GN=DED81 PE=3 SV=1	304	121.709	1.42621e-32	78.57	-1	2	211	0	260	329
TRINITY_DN9344_c0_g8	1	207	1752	98.55	3.88	sp|P36594|RPB1_SCHPO DNA-directed RNA polymerase II subunit rpb1 OS=Schizosaccharomyces pombe (strain 972 / ATCC 24843) GN=rpb1 PE=1 SV=1	192	78.5666	1.00568e-16	55.88	2	2	205	0	695	762
TRINITY_DN497_c0_g1	1	205	649	96.59	10.17	sp|P87317|YB2G_SCHPO Uncharacterized protein C31F10.16 OS=Schizosaccharomyces pombe (strain 972 / ATCC 24843) GN=SPBC31F10.16 PE=4 SV=2	128	53.9138	1.84398e-08	43.94	3	6	203	0	257	322
TRINITY_DN2970_c0_g3	1	201	967	97.01	6.72	sp|Q8UHJ6|SYI_AGRFC Isoleucine--tRNA ligase OS=Agrobacterium fabrum (strain C58 / ATCC 33970) GN=ileS PE=3 SV=1	167	68.9366	1.29289e-13	43.08	-2	6	200	0	725	789
TRINITY_DN7994_c0_g1	1	7941	326	7.48	55.21	sp|Q12251|YP011_YEAST Uncharacterized mitochondrial carrier YPR011C OS=Saccharomyces cerevisiae (strain ATCC 204508 / S288c) GN=YPR011C PE=1 SV=1	357	142.124	1.66955e-59	43.63	2	611	1204	0	142	321
TRINITY_DN8192_c0_g1	1	6745	210	7.83	67.14	sp|P36017|VPS21_YEAST Vacuolar protein sorting-associated protein 21 OS=Saccharomyces cerevisiae (strain ATCC 204508 / S288c) GN=VPS21 PE=1 SV=1	460	181.8	2.99256e-49	53.41	-3	5871	6398	0	28	168
TRINITY_DN9091_c0_g2	1	6130	703	19.77	55.33	sp|Q9H5Z1|DHX35_HUMAN Probable ATP-dependent RNA helicase DHX35 OS=Homo sapiens GN=DHX35 PE=1 SV=2	851	332.413	1.13224e-146	44.5	-3	4377	5588	0	275	663
TRINITY_DN5877_c0_g1	1	5689	979	39.23	73.85	sp|Q09813|T111_SCHPO Putative transcription initiation factor TFIID 111 kDa subunit OS=Schizosaccharomyces pombe (strain 972 / ATCC 24843) GN=SPAC2G11.14 PE=1 SV=1	1333	518.079	6.73665e-158	39.9	-2	2581	4812	0	244	966
TRINITY_DN9183_c0_g2	1	5489	759	20.82	49.01	sp|O14267|YFPC_SCHPO Uncharacterized UPF0442 protein C7D4.12c OS=Schizosaccharomyces pombe (strain 972 / ATCC 24843) GN=SPAC7D4.12c PE=3 SV=1	651	255.373	3.42481e-69	39.79	-1	1197	2339	0	321	692
TRINITY_DN7557_c0_g1	1	5253	1029	7.31	12.54	sp|Q99126|CHS3_USTMA Chitin synthase 3 OS=Ustilago maydis (strain 521 / FGSC 9021) GN=CHS3 PE=3 SV=2	368	146.362	7.01205e-34	55.81	2	4868	5251	0	284	412
TRINITY_DN9189_c0_g1	1	5077	330	11.94	55.76	sp|Q96WP5|DOHH_LENED Deoxyhypusine hydroxylase OS=Lentinula edodes GN=LIA1 PE=2 SV=1	494	194.897	1.78585e-78	51.23	-2	4303	4908	0	48	231
TRINITY_DN8912_c0_g1	1	4701	473	25.34	88.16	sp|P0CS48|PRP46_CRYNJ Pre-mRNA-splicing factor PRP46 OS=Cryptococcus neoformans var. neoformans serotype D (strain JEC21 / ATCC MYA-565) GN=PRP46 PE=3 SV=1	1506	584.719	0	68.97	-1	3295	4485	0	57	473
TRINITY_DN8558_c0_g1	1	4524	218	18.1	88.99	sp|Q86I22|FAHD1_DICDI Acylpyruvase FAHD1, mitochondrial OS=Dictyostelium discoideum GN=fahd1 PE=3 SV=1	486	191.815	6.08734e-53	39.64	-2	3705	4523	0	9	202
TRINITY_DN8484_c0_g1	1	4418	324	20.91	90.74	sp|P56272|PEP2B_GADMO Pepsin-2B OS=Gadus morhua PE=1 SV=1	267	107.457	3.03461e-23	32.82	3	1473	2396	0	29	322
TRINITY_DN8719_c0_g2	1	4323	470	13.88	43.4	sp|Q9FWW3|GSXL6_ARATH Flavin-containing monooxygenase FMO GS-OX-like 6 OS=Arabidopsis thaliana GN=At1g12130 PE=2 SV=1	209	85.1149	3.76191e-24	27.44	-1	817	1416	0	30	233
TRINITY_DN8051_c0_g1	1	4230	449	21.77	66.15	sp|O94695|YG1B_SCHPO Putative transporter C83.11 OS=Schizosaccharomyces pombe (strain 972 / ATCC 24843) GN=SPBC83.11 PE=1 SV=2	764	298.901	7.14226e-88	51.76	-3	2960	3880	0	18	314
TRINITY_DN7357_c0_g1	1	4079	325	23.54	96	sp|P49943|XYLB_BACOV Xylosidase/arabinosidase OS=Bacteroides ovatus GN=xsa PE=2 SV=1	932	363.614	1.09147e-112	58.44	-3	2824	3783	0	8	319
TRINITY_DN9215_c1_g1	1	3908	335	29.25	97.31	sp|Q9UW96|G3P_PLESA Glyceraldehyde-3-phosphate dehydrogenase OS=Pleurotus sajor-caju GN=GPD PE=2 SV=1	1428	554.673	0	78.22	1	820	1962	0	10	335
TRINITY_DN4750_c0_g1	1	3851	1237	88.03	84.88	sp|O13683|YDY2_SCHPO Uncharacterized protein C11E3.02c OS=Schizosaccharomyces pombe (strain 972 / ATCC 24843) GN=SPAC11E3.02c PE=4 SV=1	1072	417.542	8.42049e-123	26.51	-3	1	3390	0	69	1118
TRINITY_DN9180_c0_g1	1	3780	781	16.03	25.61	sp|Q9US36|KLF1_SCHPO Zinc finger protein klf1 OS=Schizosaccharomyces pombe (strain 972 / ATCC 24843) GN=klf1 PE=2 SV=1	171	70.4774	7.97712e-11	25	-2	726	1331	0	313	512
TRINITY_DN7404_c0_g1	1	3630	1098	35.04	39.98	sp|O94600|TTI1_SCHPO TEL2-interacting protein 1 OS=Schizosaccharomyces pombe (strain 972 / ATCC 24843) GN=tti1 PE=1 SV=1	226	91.6633	2.83485e-17	23.66	-1	418	1689	0	515	953
TRINITY_DN8141_c0_g2	1	3503	807	21.5	24.78	sp|P08770|TRA1_MAIZE Putative AC transposase OS=Zea mays PE=2 SV=2	168	69.3218	1.49345e-10	23.64	1	1033	1785	0	236	435
TRINITY_DN7865_c0_g1	1	3465	1055	54.29	59.24	sp|Q10752|CDC28_SCHPO Pre-mRNA-splicing factor ATP-dependent RNA helicase-like protein cdc28 OS=Schizosaccharomyces pombe (strain 972 / ATCC 24843) GN=cdc28 PE=3 SV=2	2088	808.905	0	65.35	-1	658	2538	0	235	859
TRINITY_DN8668_c2_g2	1	3336	682	16.55	29.62	sp|P39992|YEC3_YEAST Uncharacterized protein YEL023C OS=Saccharomyces cerevisiae (strain ATCC 204508 / S288c) GN=YEL023C PE=4 SV=1	278	111.694	8.63073e-24	35.64	3	1641	2192	0	18	219
TRINITY_DN7879_c3_g5	1	3293	740	42	55.27	sp|Q0DXS3|RDR1_ORYSJ Probable RNA-dependent RNA polymerase 1 OS=Oryza sativa subsp. japonica GN=RDR1 PE=2 SV=2	440	174.096	3.69159e-55	29.66	-3	439	1821	0	13	421
TRINITY_DN8483_c0_g1	1	3252	1416	62.27	47.32	sp|Q4P2B6|SEC31_USTMA Protein transport protein SEC31 OS=Ustilago maydis (strain 521 / FGSC 9021) GN=SEC31 PE=3 SV=1	1681	652.129	0	52.23	-3	1226	3250	0	252	921
TRINITY_DN6992_c0_g2	1	3168	1101	47.63	42.69	sp|D4AYW0|ABCG1_ARTBC ABC transporter G family member ARB_01379 OS=Arthroderma benhamiae (strain ATCC MYA-4681 / CBS 112371) GN=ARB_01379 PE=1 SV=1	1188	462.225	3.00841e-142	50.4	3	3	1511	0	163	632
TRINITY_DN7924_c0_g1	1	3129	115	9.2	83.48	sp|P10663|RT02_YEAST 37S ribosomal protein MRP2, mitochondrial OS=Saccharomyces cerevisiae (strain ATCC 204508 / S288c) GN=MRP2 PE=1 SV=1	241	97.4413	1.11927e-21	46.88	2	1340	1627	0	18	113
TRINITY_DN8048_c0_g1	1	3094	325	19.49	64.92	sp|Q5R5D5|AK1A1_PONAB Alcohol dehydrogenase [NADP(+)] OS=Pongo abelii GN=AKR1A1 PE=2 SV=1	389	154.451	4.66204e-48	40.19	-1	299	901	0	87	297
TRINITY_DN5992_c0_g1	1	3018	444	31.31	58.56	sp|P54644|KRAC_DICDI RAC family serine/threonine-protein kinase homolog OS=Dictyostelium discoideum GN=pkbA PE=1 SV=1	637	249.98	1.41795e-71	40.51	-2	3	947	0	114	373
TRINITY_DN6663_c0_g1	1	2946	536	28.92	54.29	sp|Q4WAZ6|FMAG_ASPFU Multifunctional cytochrome P450 monooxygenase af510 OS=Neosartorya fumigata (strain ATCC MYA-4609 / Af293 / CBS 101355 / FGSC A1100) GN=af510 PE=1 SV=1	328	130.954	1.69257e-53	28.96	-2	1698	2549	0	35	325
TRINITY_DN7639_c0_g1	1	2918	960	51.51	50.94	sp|Q9USQ1|CTF18_SCHPO Chromosome transmission fidelity protein 18 OS=Schizosaccharomyces pombe (strain 972 / ATCC 24843) GN=ctf18 PE=1 SV=1	553	217.624	2.21527e-57	31.36	-2	629	2131	0	352	840
TRINITY_DN1789_c0_g1	1	2819	780	45.55	51.28	sp|O14253|NCBP1_SCHPO Nuclear cap-binding protein subunit 1 OS=Schizosaccharomyces pombe (strain 972 / ATCC 24843) GN=cbc1 PE=1 SV=1	519	204.527	9.21277e-54	31.65	-1	528	1811	0	286	685
TRINITY_DN6240_c0_g1	1	2790	342	21.18	58.77	sp|O74627|CG1C_SCHPO Cyclin pch1 OS=Schizosaccharomyces pombe (strain 972 / ATCC 24843) GN=pch1 PE=1 SV=1	345	137.502	1.78147e-33	44.44	1	25	615	0	11	211
TRINITY_DN9072_c0_g1	1	2761	609	35.75	48.44	sp|Q92372|RFA1_SCHPO Replication factor A protein 1 OS=Schizosaccharomyces pombe (strain 972 / ATCC 24843) GN=ssb1 PE=1 SV=1	375	149.058	5.05861e-36	30.09	2	1676	2662	0	313	607
TRINITY_DN6310_c0_g1	1	2644	250	23.03	69.6	sp|Q9HGM4|SCS3_SCHPO FIT family protein scs3 OS=Schizosaccharomyces pombe (strain 972 / ATCC 24843) GN=scs3 PE=3 SV=1	235	95.1301	7.00454e-20	30.54	-3	1695	2303	0	52	225
TRINITY_DN5609_c0_g3	1	2620	932	51.76	47.32	sp|Q0CI48|MANBA_ASPTN Beta-mannosidase A OS=Aspergillus terreus (strain NIH 2624 / FGSC A1156) GN=mndA PE=3 SV=2	744	291.197	1.24581e-132	36.86	-1	299	1654	0	491	931
TRINITY_DN8379_c0_g1	1	2596	1334	21.73	13.42	sp|Q9Y7U6|RGF1_SCHPO Rho1 guanine nucleotide exchange factor 1 OS=Schizosaccharomyces pombe (strain 972 / ATCC 24843) GN=rgf1 PE=1 SV=1	202	82.4185	2.9636e-25	29.79	-1	188	751	0	625	803
TRINITY_DN6557_c1_g1	1	2574	94	4.31	39.36	sp|Q55BF5|SF3B5_DICDI Splicing factor 3B subunit 5 OS=Dictyostelium discoideum GN=sf3b5 PE=3 SV=1	125	52.7582	3.21092e-07	51.35	-1	2239	2349	0	30	66
TRINITY_DN9292_c1_g1	1	2525	720	41.11	39.44	sp|P32486|KRE6_YEAST Beta-glucan synthesis-associated protein KRE6 OS=Saccharomyces cerevisiae (strain ATCC 204508 / S288c) GN=KRE6 PE=1 SV=2	508	200.29	7.60032e-53	35.34	1	1435	2472	0	428	711
TRINITY_DN8219_c0_g1	1	2506	285	19.75	50.88	sp|Q54W11|MCFL_DICDI Mitochondrial substrate carrier family protein L OS=Dictyostelium discoideum GN=mcfL PE=3 SV=1	202	82.4185	9.37401e-16	31.33	2	731	1225	0	34	178
TRINITY_DN8228_c0_g2	1	2461	596	15.24	19.46	sp|D4ANG0|SED2_ARTBC Probable tripeptidyl-peptidase SED2 OS=Arthroderma benhamiae (strain ATCC MYA-4681 / CBS 112371) GN=SED2 PE=1 SV=1	195	79.7221	1.11641e-29	34.13	-2	4	378	0	152	267
TRINITY_DN8427_c0_g1	1	2422	675	43.85	52.59	sp|Q9P7P0|YOL4_SCHPO Uncharacterized acyltransferase C1718.04 OS=Schizosaccharomyces pombe (strain 972 / ATCC 24843) GN=SPBC1718.04 PE=1 SV=1	819	320.087	8.76072e-96	49.03	3	3	1064	0	210	564
TRINITY_DN6217_c0_g1	1	2310	807	21.56	17.72	sp|Q9DCB4|ARP21_MOUSE cAMP-regulated phosphoprotein 21 OS=Mus musculus GN=Arpp21 PE=1 SV=2	159	65.855	1.17175e-09	29.59	2	509	1006	0	152	294
TRINITY_DN6606_c0_g1	1	2274	214	13.98	48.13	sp|Q9P7C8|SLD5_SCHPO DNA replication complex GINS protein sld5 OS=Schizosaccharomyces pombe (strain 972 / ATCC 24843) GN=sld5 PE=1 SV=1	233	94.3597	5.01102e-20	43.4	-2	3	320	0	13	115
TRINITY_DN8501_c0_g2	1	2255	467	32.06	53.32	sp|Q0WQG8|GTG2_ARATH GPCR-type G protein 2 OS=Arabidopsis thaliana GN=GTG2 PE=1 SV=2	181	74.3294	1.32477e-12	25.57	3	231	953	0	117	365
TRINITY_DN7348_c0_g1	1	2198	320	12.83	23.75	sp|Q02046|MTD1_YEAST Methylenetetrahydrofolate dehydrogenase [NAD(+)] OS=Saccharomyces cerevisiae (strain ATCC 204508 / S288c) GN=MTD1 PE=1 SV=1	239	96.6709	3.30066e-36	53.19	1	1405	1686	0	138	213
TRINITY_DN7216_c0_g1	1	2176	286	30.33	60.49	sp|Q10137|SEC14_SCHPO Sec14 cytosolic factor OS=Schizosaccharomyces pombe (strain 972 / ATCC 24843) GN=sec14 PE=4 SV=1	183	75.0998	1.76321e-13	26.82	-1	404	1063	0	52	224
TRINITY_DN6773_c0_g3	1	2157	722	34.91	35.04	sp|O08679|MARK2_RAT Serine/threonine-protein kinase MARK2 OS=Rattus norvegicus GN=Mark2 PE=1 SV=1	608	238.81	1.85398e-66	44.53	3	228	980	0	65	317
TRINITY_DN7347_c1_g1	1	2129	407	55.8	100	sp|O74752|MAS5_SCHPO Mitochondrial protein import protein mas5 OS=Schizosaccharomyces pombe (strain 972 / ATCC 24843) GN=mas5 PE=3 SV=1	819	320.087	5.09274e-100	50.73	-2	878	2065	0	1	407
TRINITY_DN7529_c0_g2	1	2111	545	35.53	50.64	sp|Q4P4U7|BTN1_USTMA Protein BTN1 OS=Ustilago maydis (strain 521 / FGSC 9021) GN=BTN1 PE=3 SV=2	438	173.326	5.67588e-45	42.01	1	265	1014	0	62	337
TRINITY_DN5613_c0_g1	1	2094	686	28.08	26.24	sp|P87235|RHP42_SCHPO DNA repair protein rhp42 OS=Schizosaccharomyces pombe (strain 972 / ATCC 24843) GN=rhp42 PE=3 SV=1	357	142.124	1.99484e-40	40.3	2	1505	2092	0	428	607
TRINITY_DN8076_c0_g2	1	2042	411	41.87	69.34	sp|Q4P331|IF4A_USTMA ATP-dependent RNA helicase eIF4A OS=Ustilago maydis (strain 521 / FGSC 9021) GN=TIF1 PE=3 SV=1	1346	523.087	0	85.61	-1	609	1463	0	23	307
TRINITY_DN5765_c0_g1	1	2011	365	58.48	95.34	sp|P40506|PPCS_YEAST Phosphopantothenate--cysteine ligase CAB2 OS=Saccharomyces cerevisiae (strain ATCC 204508 / S288c) GN=CAB2 PE=1 SV=2	566	222.631	3.44329e-64	37.35	3	561	1736	0	8	355
TRINITY_DN8038_c0_g1	1	1997	758	31.1	27.04	sp|Q14684|RRP1B_HUMAN Ribosomal RNA processing protein 1 homolog B OS=Homo sapiens GN=RRP1B PE=1 SV=3	416	164.851	1.86887e-41	38.86	-1	1326	1946	0	14	218
TRINITY_DN8315_c0_g2	1	1982	655	82.95	79.39	sp|Q4GZT4|ABCG2_BOVIN ATP-binding cassette sub-family G member 2 OS=Bos taurus GN=ABCG2 PE=3 SV=2	644	252.677	2.33819e-72	32.55	3	3	1646	0	66	585
TRINITY_DN6961_c0_g1	1	1967	478	51.86	70.71	sp|O13765|DBR1_SCHPO Lariat debranching enzyme OS=Schizosaccharomyces pombe (strain 972 / ATCC 24843) GN=dbr1 PE=3 SV=2	647	253.832	9.82163e-81	42.21	-3	544	1563	0	76	413
TRINITY_DN8500_c0_g1	1	1951	456	37.37	54.39	sp|Q9US06|PAF1_SCHPO RNA polymerase II-associated protein 1 homolog OS=Schizosaccharomyces pombe (strain 972 / ATCC 24843) GN=SPAC664.03 PE=1 SV=2	191	78.1814	6.10353e-14	29.89	1	46	774	0	7	254
TRINITY_DN2669_c0_g1	1	1920	508	74.22	90.16	sp|P0DPA7|PSIH_PSICU Cytochrome P450 monooxygenase psiH OS=Psilocybe cubensis GN=psiH PE=1 SV=1	1001	390.193	2.02765e-126	39.62	2	416	1840	0	41	498
TRINITY_DN6424_c0_g6	1	1865	1574	97.48	35.39	sp|P19524|MYO2_YEAST Myosin-2 OS=Saccharomyces cerevisiae (strain ATCC 204508 / S288c) GN=MYO2 PE=1 SV=1	768	300.442	1.7818e-86	33.77	3	48	1865	0	894	1450
TRINITY_DN7193_c0_g2	1	1800	640	29.33	24.84	sp|P10242|MYB_HUMAN Transcriptional activator Myb OS=Homo sapiens GN=MYB PE=1 SV=2	283	113.62	5.37613e-25	32.4	2	314	841	0	35	193
TRINITY_DN6352_c0_g1	1	1765	444	36.71	48.2	sp|Q6GQE1|T184C_XENLA Transmembrane protein 184C OS=Xenopus laevis GN=tmem184c PE=2 SV=1	194	79.337	2.16285e-14	28.31	3	918	1565	0	183	396
TRINITY_DN9184_c1_g6	1	1752	725	35.27	28.14	sp|Q96RQ3|MCCA_HUMAN Methylcrotonoyl-CoA carboxylase subunit alpha, mitochondrial OS=Homo sapiens GN=MCCC1 PE=1 SV=3	662	259.61	6.12702e-95	62.14	-3	11	628	0	124	327
TRINITY_DN2711_c0_g2	1	1739	958	20.87	13.05	sp|Q7TN75|PEG10_MOUSE Retrotransposon-derived protein PEG10 OS=Mus musculus GN=Peg10 PE=1 SV=2	195	79.7221	3.41452e-14	36	-2	341	703	0	399	523
TRINITY_DN7546_c0_g1	1	1728	447	42.88	51.9	sp|Q94BX4|PIGA_ARATH Phosphatidylinositol N-acetylglucosaminyltransferase subunit A OS=Arabidopsis thaliana GN=PIGA PE=2 SV=1	594	233.417	4.21703e-105	48.18	-1	883	1623	0	6	237
TRINITY_DN519_c0_g1	1	1707	1216	90.51	42.11	sp|Q94A40|COPA1_ARATH Coatomer subunit alpha-1 OS=Arabidopsis thaliana GN=At1g62020 PE=2 SV=2	1647	639.032	0	58.8	-3	2	1546	0	1	512
TRINITY_DN5504_c0_g2	1	1684	938	27.26	16.74	sp|Q6H795|CLPD1_ORYSJ Chaperone protein ClpD1, chloroplastic OS=Oryza sativa subsp. japonica GN=CLPD1 PE=2 SV=1	89	38.891	3.89466e-06	29.81	-3	408	866	0	620	776
TRINITY_DN9173_c0_g1	1	1649	2335	46.21	9.29	sp|G4NYJ6|WAPA_BACPT tRNA3(Ser)-specific nuclease WapA OS=Bacillus subtilis subsp. spizizenii (strain TU-B-10) GN=wapA PE=1 SV=1	170	70.0922	4.25005e-11	26.42	2	56	817	0	1976	2192
TRINITY_DN7235_c0_g3	1	1626	380	57.01	81.32	sp|A2TBU0|EASA_EPIFI Probable inactive reductase easA OS=Epichloe festucae var. lolii GN=easA PE=2 SV=1	704	275.789	3.3025e-85	46.47	3	675	1601	0	3	311
TRINITY_DN5626_c0_g1	1	1616	1241	43.63	20.47	sp|P28569|TRK1_SACUV High-affinity potassium transport protein OS=Saccharomyces uvarum GN=TRK1 PE=3 SV=1	394	156.377	8.81287e-49	38.75	-2	611	1315	0	926	1179
TRINITY_DN8840_c1_g1	1	1597	395	41.14	54.94	sp|O74413|AROC_SCHPO Chorismate synthase OS=Schizosaccharomyces pombe (strain 972 / ATCC 24843) GN=SPCC1223.14 PE=3 SV=2	744	291.197	5.12883e-147	68.95	1	208	864	0	1	217
TRINITY_DN9348_c1_g2	1	1575	536	15.81	11.75	sp|Q4WAZ6|FMAG_ASPFU Multifunctional cytochrome P450 monooxygenase af510 OS=Neosartorya fumigata (strain ATCC MYA-4609 / Af293 / CBS 101355 / FGSC A1100) GN=af510 PE=1 SV=1	129	54.299	1.75349e-06	34.94	-3	542	790	0	302	364
TRINITY_DN7228_c0_g1	1	1566	536	37.16	37.69	sp|Q4WAZ6|FMAG_ASPFU Multifunctional cytochrome P450 monooxygenase af510 OS=Neosartorya fumigata (strain ATCC MYA-4609 / Af293 / CBS 101355 / FGSC A1100) GN=af510 PE=1 SV=1	254	102.449	3.41121e-36	28.22	-2	276	857	0	115	316
TRINITY_DN3177_c0_g1	1	1557	591	91.14	75.63	sp|Q9UUE6|SYKC_SCHPO Lysine--tRNA ligase, cytoplasmic OS=Schizosaccharomyces pombe (strain 972 / ATCC 24843) GN=krs1 PE=3 SV=1	1522	590.882	0	60.46	-1	139	1557	0	135	581
TRINITY_DN3976_c0_g2	1	1521	1323	98.42	37.64	sp|O14228|PUR4_SCHPO Probable phosphoribosylformylglycinamidine synthase OS=Schizosaccharomyces pombe (strain 972 / ATCC 24843) GN=ade3 PE=3 SV=1	1401	544.273	1.7474e-178	61.88	3	3	1499	0	380	877
TRINITY_DN5665_c0_g2	1	1512	632	99.4	75.95	sp|P87111|ETFD_SCHPO Probable electron transfer flavoprotein-ubiquinone oxidoreductase, mitochondrial OS=Schizosaccharomyces pombe (strain 972 / ATCC 24843) GN=SPAC20G8.04c PE=3 SV=1	1310	509.22	6.72405e-173	51.69	3	3	1505	0	105	584
TRINITY_DN3215_c0_g6	1	1502	2644	63.91	12.33	sp|Q13535|ATR_HUMAN Serine/threonine-protein kinase ATR OS=Homo sapiens GN=ATR PE=1 SV=3	841	328.561	2.15353e-107	48.01	2	17	976	0	2205	2530
TRINITY_DN6128_c0_g1	1	1491	238	33.6	65.55	sp|P14802|YOXD_BACSU Uncharacterized oxidoreductase YoxD OS=Bacillus subtilis (strain 168) GN=yoxD PE=3 SV=2	147	61.2326	2.32421e-09	28.14	-3	275	775	0	26	181
TRINITY_DN6183_c0_g1	1	1420	155	31.48	95.48	sp|Q03799|RT08_YEAST 37S ribosomal protein S8, mitochondrial OS=Saccharomyces cerevisiae (strain ATCC 204508 / S288c) GN=MRPS8 PE=1 SV=1	245	98.9821	8.48665e-23	33.77	3	48	494	0	8	155
TRINITY_DN7858_c1_g1	1	1408	810	51.99	27.04	sp|Q6BSE2|ORC1_DEBHA Origin recognition complex subunit 1 OS=Debaryomyces hansenii (strain ATCC 36239 / CBS 767 / JCM 1990 / NBRC 0083 / IGC 2968) GN=ORC1 PE=3 SV=2	361	143.665	3.61e-35	37.96	-1	371	1102	0	504	722
TRINITY_DN5872_c0_g1	1	1367	2335	99.85	19.44	sp|Q99PV0|PRP8_MOUSE Pre-mRNA-processing-splicing factor 8 OS=Mus musculus GN=Prpf8 PE=1 SV=2	1770	686.411	0	77.58	-3	1	1365	0	783	1236
TRINITY_DN6090_c0_g1	1	1325	752	30.57	16.22	sp|Q8CIP4|MARK4_MOUSE MAP/microtubule affinity-regulating kinase 4 OS=Mus musculus GN=Mark4 PE=1 SV=1	166	68.5514	4.91642e-11	33.33	-3	919	1323	0	186	307
TRINITY_DN6647_c1_g1	1	1311	541	93.82	78	sp|O00061|CP67_UROFA Cytochrome P450 67 (Fragment) OS=Uromyces fabae GN=CYP67 PE=2 SV=1	484	191.045	8.56971e-53	30.32	3	3	1232	0	113	534
TRINITY_DN5804_c0_g1	1	1304	306	20.48	31.05	sp|O14180|YDS4_SCHPO Brix domain-containing protein C4F8.04 OS=Schizosaccharomyces pombe (strain 972 / ATCC 24843) GN=SPAC4F8.04 PE=4 SV=1	286	114.775	8.10997e-50	55.79	-3	631	897	0	187	281
TRINITY_DN9127_c0_g4	1	1294	1036	28.98	12.55	sp|Q9C5U1|AHK3_ARATH Histidine kinase 3 OS=Arabidopsis thaliana GN=AHK3 PE=1 SV=1	212	86.2705	1.3308e-16	35.34	2	437	811	0	891	1020
TRINITY_DN7755_c0_g1	1	1287	959	39.39	18.25	sp|Q9Z1Z0|USO1_MOUSE General vesicular transport factor p115 OS=Mus musculus GN=Uso1 PE=1 SV=2	213	86.6557	7.84608e-27	34.66	-1	625	1131	0	10	184
TRINITY_DN5812_c0_g1	1	1278	1600	73	18.94	sp|B0KWH8|THOC2_CALJA THO complex subunit 2 OS=Callithrix jacchus GN=THOC2 PE=3 SV=1	624	244.973	2.0404e-69	39.42	-1	346	1278	0	495	797
TRINITY_DN8334_c1_g3	1	1240	1331	39.19	11.87	sp|Q55A09|Y9963_DICDI Probable serine/threonine-protein kinase DDB_G0272254 OS=Dictyostelium discoideum GN=DDB_G0272254 PE=3 SV=1	274	110.153	1.81184e-24	38.46	3	750	1235	0	1120	1277
TRINITY_DN7817_c1_g1	1	1232	765	54.79	28.76	sp|O70423|AOC3_MOUSE Membrane primary amine oxidase OS=Mus musculus GN=Aoc3 PE=1 SV=3	370	147.132	6.9157e-37	35.53	-2	389	1063	0	474	693
TRINITY_DN5533_c0_g1	1	1224	601	11.76	7.99	sp|P32901|PTR2_YEAST Peptide transporter PTR2 OS=Saccharomyces cerevisiae (strain ATCC 204508 / S288c) GN=PTR2 PE=1 SV=2	134	56.225	3.56428e-07	47.92	2	974	1117	0	61	108
TRINITY_DN2566_c0_g1	1	1217	356	66.06	74.44	sp|Q8J207|ERG3_LEPMC Delta(7)-sterol 5(6)-desaturase OS=Leptosphaeria maculans GN=ERG3 PE=3 SV=1	588	231.106	5.30298e-70	42.91	3	78	881	0	1	265
TRINITY_DN4998_c0_g2	1	1211	660	45.33	28.48	sp|Q8CG07|WRIP1_RAT ATPase WRNIP1 OS=Rattus norvegicus GN=Wrnip1 PE=1 SV=1	304	121.709	3.23479e-50	41.58	2	2	550	0	347	534
TRINITY_DN4913_c0_g1	1	1196	316	80.52	100	sp|B0CRU6|DRE2_LACBS Fe-S cluster assembly protein DRE2 OS=Laccaria bicolor (strain S238N-H82 / ATCC MYA-4686) GN=DRE2 PE=3 SV=1	894	348.977	2.23318e-116	60.49	-2	149	1111	0	1	316
TRINITY_DN8867_c0_g2	1	1190	1165	86.97	27.98	sp|Q10233|RPC2_SCHPO DNA-directed RNA polymerase III subunit RPC2 OS=Schizosaccharomyces pombe (strain 972 / ATCC 24843) GN=rpc2 PE=2 SV=1	1070	416.772	4.01112e-133	59.83	2	152	1186	0	23	348
TRINITY_DN6786_c0_g1	1	1175	546	58.98	42.12	sp|P78568|PUT2_AGABI Delta-1-pyrroline-5-carboxylate dehydrogenase OS=Agaricus bisporus GN=pruA PE=3 SV=1	874	341.273	4.37666e-140	70.13	-2	482	1174	0	207	436
TRINITY_DN4907_c0_g2	1	1169	470	43.37	35.74	sp|P0CT89|OMT1_PHACR 4-O-methyltransferase 1 OS=Phanerochaete chrysosporium (strain RP-78 / ATCC MYA-4764 / FGSC 9002) GN=fgenesh1_kg.2_#_1379_#_Locus12621v1rpkm4.09 PE=1 SV=1	444	175.637	1.72756e-61	55.62	-3	256	762	0	259	426
TRINITY_DN9258_c1_g7	1	1160	609	96.21	60.92	sp|O60017|DAK_PICAN Dihydroxyacetone kinase OS=Pichia angusta GN=DAK PE=3 SV=1	594	233.417	1.24395e-68	41.79	2	44	1159	0	99	469
TRINITY_DN4477_c0_g2	1	1153	468	52.04	33.97	sp|Q92353|UBP6_SCHPO Ubiquitin carboxyl-terminal hydrolase 6 OS=Schizosaccharomyces pombe (strain 972 / ATCC 24843) GN=ubp6 PE=1 SV=2	264	106.301	1.3706e-43	37	-1	230	829	0	309	467
TRINITY_DN6755_c0_g1	1	1127	737	19.17	10.45	sp|O23482|OPT3_ARATH Oligopeptide transporter 3 OS=Arabidopsis thaliana GN=OPT3 PE=2 SV=3	109	46.595	7.31699e-09	33.77	-1	18	233	0	56	132
TRINITY_DN2388_c0_g1	1	1119	495	92.23	66.87	sp|A0A089FNE5|PRLL_FUNXX MFS transporter prlL OS=Fungal sp. (strain NRRL 50135) GN=prlL PE=3 SV=1	323	129.028	9.19105e-32	30.7	2	2	1033	0	165	495
TRINITY_DN7827_c0_g4	1	1106	385	23.06	22.08	sp|Q01752|AAD_PHACH Aryl-alcohol dehydrogenase [NADP(+)] OS=Phanerochaete chrysosporium PE=1 SV=1	233	94.3597	2.66349e-20	49.41	-3	13	267	0	292	376
TRINITY_DN6974_c0_g1	1	1099	525	78.89	55.24	sp|P22068|ATPB_SCHPO ATP synthase subunit beta, mitochondrial OS=Schizosaccharomyces pombe (strain 972 / ATCC 24843) GN=atp2 PE=1 SV=1	1240	482.256	4.18931e-166	82.41	1	232	1098	0	50	339
TRINITY_DN5062_c0_g1	1	1083	363	78.12	80.99	sp|Q54RA4|Y3291_DICDI Probable iron/ascorbate oxidoreductase DDB_G0283291 OS=Dictyostelium discoideum GN=DDB_G0283291 PE=3 SV=1	491	193.741	3.20493e-56	36.63	-1	121	966	0	12	305
TRINITY_DN1385_c0_g1	1	1070	262	53.27	73.66	sp|Q9USQ9|PSB7_SCHPO Probable proteasome subunit beta type-7 OS=Schizosaccharomyces pombe (strain 972 / ATCC 24843) GN=SPBC577.10 PE=3 SV=1	580	228.024	1.16426e-70	56.48	3	183	752	0	33	225
TRINITY_DN4747_c0_g1	1	1048	281	40.65	49.82	sp|Q9P7V4|KTI12_SCHPO Protein kti12 OS=Schizosaccharomyces pombe (strain 972 / ATCC 24843) GN=kti12 PE=3 SV=1	230	93.2041	1.07093e-31	36.11	-2	304	729	0	118	257
TRINITY_DN8728_c0_g6	1	1042	348	46.93	33.91	sp|P81054|PLMP_GRIFR Peptidyl-Lys metalloendopeptidase OS=Grifola frondosa GN=MEP PE=1 SV=2	122	51.6026	4.32415e-06	25.77	-3	546	1034	0	225	342
TRINITY_DN6419_c0_g1	1	1013	449	54.2	35.86	sp|Q9NWS8|RMND1_HUMAN Required for meiotic nuclear division protein 1 homolog OS=Homo sapiens GN=RMND1 PE=1 SV=2	197	80.4925	2.05475e-15	30.48	2	464	1012	0	224	384
TRINITY_DN5320_c0_g1	1	1007	565	16.68	10.27	sp|P49412|PRIB_LENED Protein priB OS=Lentinula edodes GN=priB PE=2 SV=1	145	60.4622	9.70039e-09	50	-3	250	417	0	3	60
TRINITY_DN7503_c0_g4	1	1001	280	50.05	57.86	sp|P37959|YUSZ_BACSU Uncharacterized oxidoreductase YusZ OS=Bacillus subtilis (strain 168) GN=yusZ PE=3 SV=2	191	78.1814	2.7546e-15	38.32	3	501	1001	0	8	169
TRINITY_DN6818_c0_g1	1	994	531	18.41	11.49	sp|E4QP00|HMFO_METS6 5-(hydroxymethyl)furfural oxidase OS=Methylovorus sp. (strain MP688) GN=MPQ_0130 PE=1 SV=1	172	70.8626	3.44886e-12	57.38	-3	552	734	0	263	323
TRINITY_DN7034_c0_g1	1	989	147	24.87	54.42	sp|O59727|YHX7_SCHPO Protein PBDC1 homolog OS=Schizosaccharomyces pombe (strain 972 / ATCC 24843) GN=SPBC3E7.07c PE=3 SV=1	189	77.411	6.59645e-24	47.56	-3	391	636	0	48	127
TRINITY_DN6640_c0_g2	1	982	628	52.85	27.55	sp|B0CS18|GUF1_LACBS Translation factor GUF1, mitochondrial OS=Laccaria bicolor (strain S238N-H82 / ATCC MYA-4686) GN=GUF1 PE=3 SV=1	743	290.812	4.65275e-112	76.3	1	463	981	0	225	397
TRINITY_DN4827_c0_g1	1	976	785	82.99	33.5	sp|P40900|ISP4_SCHPO Sexual differentiation process protein isp4 OS=Schizosaccharomyces pombe (strain 972 / ATCC 24843) GN=isp4 PE=2 SV=2	544	214.157	3.05469e-61	40.73	-2	1	810	0	35	297
TRINITY_DN5440_c0_g1	1	965	195	44.15	74.36	sp|O94561|PRX_SCHPO Peroxiredoxin bcp1 OS=Schizosaccharomyces pombe (strain 972 / ATCC 24843) GN=bcp1 PE=1 SV=1	311	124.405	2.56575e-32	48.97	3	366	791	0	46	190
TRINITY_DN6145_c0_g1	1	948	963	79.75	25.03	sp|A7YWD2|IPO13_BOVIN Importin-13 OS=Bos taurus GN=IPO13 PE=2 SV=1	218	88.5817	4.78408e-18	24.12	2	35	790	0	412	652
TRINITY_DN5790_c0_g1	1	938	228	87.95	86.84	sp|P50086|PSD10_YEAST Probable 26S proteasome regulatory subunit p28 OS=Saccharomyces cerevisiae (strain ATCC 204508 / S288c) GN=NAS6 PE=1 SV=1	222	90.1225	8.70569e-20	28.72	3	111	935	0	5	202
TRINITY_DN5399_c0_g1	1	933	960	27.33	8.65	sp|Q55EC7|GEFX_DICDI RasGEF domain-containing serine/threonine-protein kinase X OS=Dictyostelium discoideum GN=gefX PE=2 SV=1	138	57.7658	4.5394e-13	35.16	-1	628	882	0	60	142
TRINITY_DN9331_c2_g1	1	911	127	16.47	39.37	sp|Q5XID5|YPEL4_RAT Protein yippee-like 4 OS=Rattus norvegicus GN=Ypel4 PE=1 SV=1	161	66.6254	2.56733e-12	52	-2	104	253	0	77	126
TRINITY_DN9288_c2_g4	1	905	597	17.9	8.71	sp|Q0CJU8|HSE1_ASPTN Class E vacuolar protein-sorting machinery protein hse1 OS=Aspergillus terreus (strain NIH 2624 / FGSC A1156) GN=hse1 PE=3 SV=1	161	66.6254	5.22306e-11	55.56	2	290	451	0	230	281
TRINITY_DN10503_c0_g1	1	899	418	77.42	55.5	sp|Q9Y823|HOSM_SCHPO Homocitrate synthase, mitochondrial OS=Schizosaccharomyces pombe (strain 972 / ATCC 24843) GN=lys4 PE=1 SV=1	1007	392.504	1.64609e-133	83.62	3	204	899	0	19	250
TRINITY_DN569_c0_g1	1	890	282	91.01	99.29	sp|Q9P7H3|PHB1_SCHPO Prohibitin-1 OS=Schizosaccharomyces pombe (strain 972 / ATCC 24843) GN=phb1 PE=3 SV=1	985	384.03	3.3065e-132	65.71	-2	50	859	0	1	280
TRINITY_DN7433_c0_g2	1	884	285	38.35	35.44	sp|Q54DX7|TAZ1_DICDI Putative lysophosphatidylcholine acyltransferase OS=Dictyostelium discoideum GN=taz PE=3 SV=1	247	99.7525	6.15707e-23	43.36	1	193	531	0	78	178
TRINITY_DN5036_c0_g1	1	874	173	23.68	39.31	sp|Q54UB0|TM208_DICDI Transmembrane protein 208 homolog OS=Dictyostelium discoideum GN=tmem208 PE=3 SV=1	135	56.6102	1.8769e-08	40.58	3	321	527	0	75	142
TRINITY_DN6171_c0_g1	1	870	268	57.24	53.73	sp|P78346|RPP30_HUMAN Ribonuclease P protein subunit p30 OS=Homo sapiens GN=RPP30 PE=1 SV=1	178	73.1738	6.87854e-14	28.92	2	32	529	0	100	243
TRINITY_DN582_c0_g1	1	865	606	41.27	13.86	sp|Q5RKI0|WDR1_RAT WD repeat-containing protein 1 OS=Rattus norvegicus GN=Wdr1 PE=1 SV=3	125	52.7582	1.70728e-06	30.58	-1	71	427	0	1	84
TRINITY_DN4809_c0_g1	1	855	179	31.93	51.4	sp|Q3ZBL5|PTH2_BOVIN Peptidyl-tRNA hydrolase 2, mitochondrial OS=Bos taurus GN=PTRH2 PE=2 SV=1	197	80.4925	1.21533e-18	53.26	1	472	744	0	87	178
TRINITY_DN7971_c0_g1	1	837	543	85.66	46.22	sp|Q4P763|GUAA_USTMA GMP synthase [glutamine-hydrolyzing] OS=Ustilago maydis (strain 521 / FGSC 9021) GN=GUA1 PE=3 SV=1	891	347.821	9.06787e-115	76.49	-1	109	825	0	252	502
TRINITY_DN8318_c0_g2	1	821	196	41.66	58.67	sp|Q8VYB1|MED31_ARATH Mediator of RNA polymerase II transcription subunit 31 OS=Arabidopsis thaliana GN=MED31 PE=1 SV=1	258	103.99	3.7593e-25	47.41	-1	444	785	0	8	122
TRINITY_DN8080_c1_g4	1	797	209	28.98	25.36	sp|Q9P975|IF4E_CANAL Eukaryotic translation initiation factor 4E OS=Candida albicans (strain SC5314 / ATCC MYA-2876) GN=TIF45 PE=3 SV=1	121	51.2174	1.42667e-09	37.66	1	439	669	0	17	69
TRINITY_DN5025_c0_g1	1	791	197	48.93	64.97	sp|O93980|COX5_ASPNG Cytochrome c oxidase polypeptide 5, mitochondrial OS=Aspergillus niger GN=cox5 PE=3 SV=1	293	117.472	3.3766e-30	46.51	-3	220	606	0	63	190
TRINITY_DN4443_c0_g2	1	748	234	60.56	54.27	sp|E9P974|KAD3_YEASX GTP:AMP phosphotransferase, mitochondrial OS=Saccharomyces cerevisiae GN=ADK2 PE=1 SV=1	332	132.494	1.30921e-35	46.36	-2	295	747	0	99	225
TRINITY_DN8410_c1_g1	1	743	259	80.75	70.66	sp|A5DNX8|KFA_PICGU Kynurenine formamidase OS=Meyerozyma guilliermondii (strain ATCC 6260 / CBS 566 / DSM 6381 / JCM 1539 / NBRC 10279 / NRRL Y-324) GN=BNA7 PE=3 SV=2	155	64.3142	6.27265e-11	27.05	-2	128	727	0	30	212
TRINITY_DN8665_c0_g3	1	733	666	53.21	19.52	sp|Q5B0C0|HSP7M_EMENI Heat shock 70 kDa protein OS=Emericella nidulans (strain FGSC A4 / ATCC 38163 / CBS 112.46 / NRRL 194 / M139) GN=AN6010 PE=1 SV=1	353	140.584	1.53646e-36	55.38	1	1	390	0	515	644
TRINITY_DN6861_c0_g2	1	725	608	44.28	17.6	sp|O94268|NOP2_SCHPO 25S rRNA (cytosine-C(5))-methyltransferase nop2 OS=Schizosaccharomyces pombe (strain 972 / ATCC 24843) GN=nop2 PE=1 SV=1	447	176.792	1.53859e-49	71.96	2	2	322	0	436	542
TRINITY_DN3409_c0_g1	1	716	719	66.62	22.25	sp|Q96WJ0|ERG7_PNECA Lanosterol synthase OS=Pneumocystis carinii GN=ERG7 PE=2 SV=1	500	197.208	1.35296e-56	56.25	-2	233	709	0	555	714
TRINITY_DN2169_c0_g1	1	708	1529	58.05	7.91	sp|B1Q3J6|DNM1B_ORYSJ DNA (cytosine-5)-methyltransferase 1B OS=Oryza sativa subsp. japonica GN=MET1B PE=2 SV=1	227	92.0485	2.36947e-19	35.77	-1	298	708	0	1229	1349
TRINITY_DN4180_c0_g1	1	695	653	77.27	20.06	sp|B2WKX9|MEP_PYRTR Extracellular metalloproteinase OS=Pyrenophora tritici-repentis (strain Pt-1C-BFP) GN=MEP PE=2 SV=1	255	102.834	1.97572e-23	36.87	2	2	538	0	502	632
TRINITY_DN5181_c0_g1	1	687	238	75.11	74.79	sp|Q9P7Z3|EFM4_SCHPO Protein-lysine N-methyltransferase efm4 OS=Schizosaccharomyces pombe (strain 972 / ATCC 24843) GN=see1 PE=2 SV=1	268	107.842	1.38689e-26	36.9	3	36	551	0	21	198
TRINITY_DN5472_c0_g1	1	670	540	42.09	17.96	sp|Q25BW4|BGL1B_PHACH Beta-glucosidase 1B OS=Phanerochaete chrysosporium GN=BGL1B PE=1 SV=1	307	122.865	7.91359e-31	59.79	-2	313	594	0	171	267
TRINITY_DN5159_c0_g1	1	662	435	77.95	36.55	sp|B8NX60|PGXB_ASPFN Probable exopolygalacturonase B OS=Aspergillus flavus (strain ATCC 200026 / FGSC A1120 / NRRL 3357 / JCM 12722 / SRRC 167) GN=pgxB PE=3 SV=1	375	149.058	1.38433e-40	42.94	-2	143	658	0	264	422
TRINITY_DN6020_c0_g3	1	658	448	99.85	48.88	sp|P49741|TBAA_SCHCO Tubulin alpha-1A chain OS=Schizophyllum commune GN=TUB-1A PE=3 SV=1	976	380.563	9.30915e-130	90.41	2	2	658	0	96	314
TRINITY_DN4335_c0_g3	1	649	1019	91.99	18.06	sp|B0DC53|PFF1_LACBS Vacuolar membrane protease OS=Laccaria bicolor (strain S238N-H82 / ATCC MYA-4686) GN=LACBIDRAFT_294465 PE=3 SV=1	673	263.848	4.32251e-80	66.5	2	53	649	0	88	271
TRINITY_DN2715_c0_g1	1	645	1241	99.53	16.36	sp|P38095|LAMA_EMENI Putative urea carboxylase OS=Emericella nidulans (strain FGSC A4 / ATCC 38163 / CBS 112.46 / NRRL 194 / M139) GN=lamA PE=2 SV=2	364	144.821	1.32126e-37	39.35	-2	3	644	0	541	743
TRINITY_DN3760_c0_g4	1	636	390	44.81	24.62	sp|B0CQH8|LIPA_LACBS Lipoyl synthase, mitochondrial OS=Laccaria bicolor (strain S238N-H82 / ATCC MYA-4686) GN=LACBIDRAFT_181332 PE=3 SV=1	430	170.244	2.72734e-70	83.33	-2	213	497	0	36	131
TRINITY_DN1782_c0_g1	1	632	851	99.68	24.68	sp|O14031|PGT1_SCHPO Glutathione transporter 1 OS=Schizosaccharomyces pombe (strain 972 / ATCC 24843) GN=pgt1 PE=1 SV=1	621	243.817	1.64147e-73	54.76	-2	2	631	0	575	784
TRINITY_DN3628_c0_g2	1	601	874	85.86	18.54	sp|Q99128|AP1G1_USTMA AP-1 complex subunit gamma-1 OS=Ustilago maydis (strain 521 / FGSC 9021) GN=APL4 PE=3 SV=3	673	263.848	6.31594e-81	75	-1	2	517	0	16	177
TRINITY_DN8208_c0_g9	1	590	1465	86.95	11.88	sp|Q9P5N0|ABC3_SCHPO ATP-binding cassette transporter abc3 OS=Schizosaccharomyces pombe (strain 972 / ATCC 24843) GN=abc3 PE=2 SV=1	394	156.377	9.06896e-42	46.29	2	77	589	0	505	678
TRINITY_DN2343_c0_g1	1	583	1419	98.8	13.88	sp|P40976|LYS2_SCHPO L-2-aminoadipate reductase OS=Schizosaccharomyces pombe (strain 972 / ATCC 24843) GN=lys1 PE=1 SV=3	516	203.371	3.18351e-58	52.26	-2	7	582	0	1199	1395
TRINITY_DN4697_c0_g2	1	572	708	54.02	14.41	sp|Q3TPX4|EXOC5_MOUSE Exocyst complex component 5 OS=Mus musculus GN=Exoc5 PE=1 SV=2	139	58.151	7.63177e-09	31.07	-1	72	380	0	410	511
TRINITY_DN2128_c0_g2	1	549	161	75.96	96.89	sp|P47076|RPC9_YEAST DNA-directed RNA polymerase III subunit RPC9 OS=Saccharomyces cerevisiae (strain ATCC 204508 / S288c) GN=RPC17 PE=1 SV=2	148	61.6178	5.00241e-11	32.05	1	82	498	0	3	158
TRINITY_DN3072_c0_g1	1	542	246	79.7	56.5	sp|P53970|EFM6_YEAST Protein-lysine N-methyltransferase EFM6 OS=Saccharomyces cerevisiae (strain ATCC 204508 / S288c) GN=EFM6 PE=1 SV=1	138	57.7658	2.74357e-09	28.67	3	21	452	0	78	216
TRINITY_DN7896_c4_g3	1	533	403	54.03	23.08	sp|O42963|NUP44_SCHPO Nucleoporin nup44 OS=Schizosaccharomyces pombe (strain 972 / ATCC 24843) GN=nup44 PE=2 SV=1	180	73.9442	2.0604e-14	43.75	3	210	497	0	138	230
TRINITY_DN2891_c0_g1	1	530	570	44.15	13.33	sp|O42873|PDC4_SCHPO Putative pyruvate decarboxylase C3G9.11c OS=Schizosaccharomyces pombe (strain 972 / ATCC 24843) GN=SPAC3G9.11c PE=3 SV=1	168	69.3218	2.05051e-22	48.1	1	199	432	0	494	569
TRINITY_DN6201_c0_g2	1	521	442	42.61	17.65	sp|P27809|KRE2_YEAST Glycolipid 2-alpha-mannosyltransferase OS=Saccharomyces cerevisiae (strain ATCC 204508 / S288c) GN=KRE2 PE=1 SV=1	205	83.5741	6.30912e-25	48.72	3	225	446	0	356	433
TRINITY_DN3662_c0_g1	1	491	1275	50.1	6.51	sp|Q9Y7U5|RGF3_SCHPO Rho1 guanine nucleotide exchange factor 3 OS=Schizosaccharomyces pombe (strain 972 / ATCC 24843) GN=rgf3 PE=1 SV=1	122	51.6026	6.88633e-07	37.35	-3	1	246	0	461	543
TRINITY_DN3575_c0_g2	1	476	1689	73.11	6.57	sp|P15398|RPA1_SCHPO DNA-directed RNA polymerase I subunit rpa1 OS=Schizosaccharomyces pombe (strain 972 / ATCC 24843) GN=rpa1 PE=1 SV=2	285	114.39	8.17644e-28	50	1	79	426	0	1502	1612
TRINITY_DN2869_c0_g1	1	467	439	82.23	24.83	sp|Q9VKJ0|HGD_DROME Homogentisate 1,2-dioxygenase OS=Drosophila melanogaster GN=hgo PE=2 SV=3	236	95.5153	2.86779e-22	48.84	3	84	467	0	201	309
TRINITY_DN8432_c0_g2	1	464	465	95.69	32.47	sp|O00092|PHYA_ASPFU 3-phytase A OS=Neosartorya fumigata (strain ATCC MYA-4609 / Af293 / CBS 101355 / FGSC A1100) GN=phyA PE=1 SV=1	138	57.7658	5.66904e-09	30.13	2	8	451	0	66	216
TRINITY_DN10130_c0_g1	1	461	523	85.25	25.43	sp|P51650|SSDH_RAT Succinate-semialdehyde dehydrogenase, mitochondrial OS=Rattus norvegicus GN=Aldh5a1 PE=1 SV=2	384	152.525	2.07668e-42	60.15	-2	65	457	0	391	523
TRINITY_DN8605_c0_g2	1	455	433	62.64	21.94	sp|O13639|SAHH_SCHPO Adenosylhomocysteinase OS=Schizosaccharomyces pombe (strain 972 / ATCC 24843) GN=pi047 PE=3 SV=1	421	166.777	3.06585e-48	80	-1	171	455	0	339	433
TRINITY_DN2019_c0_g1	1	449	1594	99.55	8.91	sp|B1AZI6|THOC2_MOUSE THO complex subunit 2 OS=Mus musculus GN=Thoc2 PE=1 SV=1	216	87.8113	7.49875e-19	32.21	-2	2	448	0	877	1018
TRINITY_DN1250_c0_g1	1	429	764	46.15	8.77	sp|Q12500|AVL9_YEAST Late secretory pathway protein AVL9 OS=Saccharomyces cerevisiae (strain ATCC 204508 / S288c) GN=AVL9 PE=1 SV=1	164	67.781	2.7318e-12	47.76	2	2	199	0	101	167
TRINITY_DN3877_c0_g2	1	426	340	70.42	19.41	sp|Q14565|DMC1_HUMAN Meiotic recombination protein DMC1/LIM15 homolog OS=Homo sapiens GN=DMC1 PE=1 SV=2	180	73.9442	2.98603e-19	44.55	1	13	312	0	185	250
TRINITY_DN4030_c0_g1	1	423	469	96.45	27.29	sp|Q7SH17|ACKA_NEUCR Probable acetate kinase OS=Neurospora crassa (strain ATCC 24698 / 74-OR23-1A / CBS 708.71 / DSM 1257 / FGSC 987) GN=B12J7.040 PE=3 SV=3	191	78.1814	4.0183e-16	35.71	1	16	423	0	23	150
TRINITY_DN7797_c0_g1	1	417	777	97.84	16.34	sp|Q09697|RGA8_SCHPO Rho-GTPase-activating protein 8 OS=Schizosaccharomyces pombe (strain 972 / ATCC 24843) GN=rga8 PE=1 SV=1	131	55.0694	3.62484e-08	28.47	-1	1	408	0	495	621
TRINITY_DN3788_c0_g1	1	414	857	23.19	3.73	sp|Q8CJG1|AGO1_MOUSE Protein argonaute-1 OS=Mus musculus GN=Ago1 PE=1 SV=2	122	51.6026	6.19523e-07	68.75	1	10	105	0	769	800
TRINITY_DN8853_c0_g2	1	388	190	31.7	21.58	sp|Q5R6W3|RBM18_PONAB Probable RNA-binding protein 18 OS=Pongo abelii GN=RBM18 PE=2 SV=1	140	58.5362	3.28131e-10	58.54	-2	7	129	0	36	76
TRINITY_DN2437_c0_g1	1	370	576	50.27	10.76	sp|P27614|CBPS_YEAST Carboxypeptidase S OS=Saccharomyces cerevisiae (strain ATCC 204508 / S288c) GN=CPS1 PE=1 SV=2	181	74.3294	8.2461e-15	48.39	2	146	331	0	131	192
TRINITY_DN3241_c0_g2	1	363	943	81.82	10.5	sp|Q28L73|GCSP_JANSC Glycine dehydrogenase (decarboxylating) OS=Jannaschia sp. (strain CCS1) GN=gcvP PE=3 SV=1	259	104.375	4.4367e-25	64.65	1	64	360	0	101	199
TRINITY_DN7883_c0_g1	1	346	200	26.88	15.5	sp|Q92429|SODM_GANMI Superoxide dismutase [Mn], mitochondrial OS=Ganoderma microsporum PE=2 SV=1	107	45.8246	1.36404e-10	67.74	-1	104	196	0	169	199
TRINITY_DN3581_c0_g1	1	336	358	57.14	18.99	sp|B8NM74|USTQ_ASPFN Tyrosinase ustQ OS=Aspergillus flavus (strain ATCC 200026 / FGSC A1120 / NRRL 3357 / JCM 12722 / SRRC 167) GN=ustQ PE=1 SV=1	113	48.1358	3.20733e-06	32.35	2	116	307	0	72	139
TRINITY_DN7845_c0_g1	1	310	678	99.68	15.04	sp|Q9URZ5|VPS1_SCHPO Vacuolar protein sorting-associated protein 1 OS=Schizosaccharomyces pombe (strain 972 / ATCC 24843) GN=vps1 PE=3 SV=2	358	142.51	3.69264e-39	62.14	1	1	309	0	411	512
TRINITY_DN3068_c0_g3	1	297	585	98.99	17.26	sp|Q4PDT1|DBP3_USTMA ATP-dependent RNA helicase DBP3 OS=Ustilago maydis (strain 521 / FGSC 9021) GN=DBP3 PE=3 SV=1	197	80.4925	3.29808e-17	43.93	2	2	295	0	207	307
TRINITY_DN4988_c0_g2	1	290	369	44.48	11.38	sp|A7TPB3|CD123_VANPO Cell division cycle protein 123 OS=Vanderwaltozyma polyspora (strain ATCC 22028 / DSM 70294) GN=CDC123 PE=3 SV=1	124	52.373	9.80817e-08	53.49	-1	3	131	0	108	149
TRINITY_DN6746_c0_g2	1	250	499	76.8	12.83	sp|Q55EL3|UCKA_DICDI Uridine-cytidine kinase A OS=Dictyostelium discoideum GN=udkA PE=3 SV=1	158	65.4698	2.31235e-12	48.44	3	3	194	0	299	362
TRINITY_DN1414_c0_g2	1	229	450	86.46	15.33	sp|Q500W7|PIGM_ARATH GPI mannosyltransferase 1 OS=Arabidopsis thaliana GN=PIGM PE=2 SV=1	147	61.2326	6.20155e-11	47.14	3	18	215	0	8	76
TRINITY_DN9134_c1_g2	1	7897	390	5.32	35.38	sp|Q99816|TS101_HUMAN Tumor susceptibility gene 101 protein OS=Homo sapiens GN=TSG101 PE=1 SV=2	261	105.145	5.02947e-22	36.43	1	2971	3390	0	8	145
TRINITY_DN9219_c0_g4	1	6734	857	29.45	75.38	sp|P78586|ARG56_CANAX Protein ARG5,6, mitochondrial OS=Candida albicans GN=ARG5,6 PE=3 SV=1	1584	614.764	0	50.6	-3	931	2913	0	5	650
TRINITY_DN7878_c0_g2	1	6121	595	8.43	26.05	sp|V5NDL4|PDH1_AGACM Pyranose dehydrogenase OS=Agaricus campestris GN=pdh1 PE=1 SV=1	212	86.2705	3.47188e-27	32.95	-3	5088	5603	0	258	412
TRINITY_DN8924_c0_g2	1	5468	814	8.61	14.5	sp|A0A0D1E9B9|VOSA_USTMA Spore development regulator umv1 OS=Ustilago maydis (strain 521 / FGSC 9021) GN=umv1 PE=3 SV=1	379	150.599	2.36141e-35	49.68	-2	2453	2923	0	151	268
TRINITY_DN7983_c1_g1	1	5245	694	21.91	47.41	sp|Q5K8R6|CXT1_CRYNJ Beta-1,2-xylosyltransferase 1 OS=Cryptococcus neoformans var. neoformans serotype D (strain JEC21 / ATCC MYA-565) GN=CXT1 PE=1 SV=1	265	106.686	7.96776e-22	24.94	-3	111	1259	0	334	662
TRINITY_DN5413_c0_g2	1	5073	1362	49.91	64.17	sp|P36619|PMD1_SCHPO Leptomycin B resistance protein pmd1 OS=Schizosaccharomyces pombe (strain 972 / ATCC 24843) GN=pmd1 PE=3 SV=2	1472	571.622	0	37.97	3	2166	4697	0	80	953
TRINITY_DN8925_c0_g3	1	4877	1787	22.58	20.98	sp|P0CE10|DEAHB_ARATH ATP-dependent RNA helicase DEAH11, chloroplastic OS=Arabidopsis thaliana GN=At4g01020 PE=3 SV=1	226	91.6633	5.89845e-17	21.45	1	3628	4728	0	1322	1696
TRINITY_DN3263_c0_g1	1	4691	1401	77.38	76.87	sp|O14299|WIS4_SCHPO MAP kinase kinase kinase wis4 OS=Schizosaccharomyces pombe (strain 972 / ATCC 24843) GN=wis4 PE=3 SV=1	1961	759.985	0	35.75	3	513	4142	0	235	1311
TRINITY_DN9029_c1_g1	1	4516	325	12.02	58.77	sp|Q9JII6|AK1A1_MOUSE Alcohol dehydrogenase [NADP(+)] OS=Mus musculus GN=Akr1a1 PE=1 SV=3	329	131.339	1.26655e-40	35.57	-2	2914	3456	0	110	300
TRINITY_DN8820_c0_g1	1	4418	568	32.53	69.72	sp|O13890|YE35_SCHPO UPF0061 protein C20G4.05c OS=Schizosaccharomyces pombe (strain 972 / ATCC 24843) GN=SPAC20G4.05c PE=3 SV=1	490	193.356	4.95936e-70	33.27	-1	123	1559	0	173	568
TRINITY_DN8334_c1_g7	1	4230	1202	4.89	5.74	sp|Q0UJJ7|NST1_PHANO Stress response protein NST1 OS=Phaeosphaeria nodorum (strain SN15 / ATCC MYA-4574 / FGSC 10173) GN=NST1 PE=3 SV=3	281	112.849	1.15844e-33	72.46	1	1279	1485	0	281	349
TRINITY_DN9254_c1_g1	1	4153	148	11.49	83.11	sp|P40030|ERG28_YEAST Ergosterol biosynthetic protein 28 OS=Saccharomyces cerevisiae (strain ATCC 204508 / S288c) GN=ERG28 PE=1 SV=1	295	118.242	2.35367e-28	39.38	-2	79	555	0	21	143
TRINITY_DN8334_c0_g1	1	4078	872	25.38	36.12	sp|P40995|SCD1_SCHPO Rho guanine nucleotide exchange factor scd1 OS=Schizosaccharomyces pombe (strain 972 / ATCC 24843) GN=scd1 PE=1 SV=2	634	248.825	5.80537e-67	40	2	809	1843	0	232	546
TRINITY_DN8601_c1_g1	1	3905	240	16.59	90	sp|O26779|RRP41_METTH Exosome complex component Rrp41 OS=Methanothermobacter thermautotrophicus (strain ATCC 29096 / DSM 1053 / JCM 10044 / NBRC 100330 / Delta H) GN=rrp41 PE=1 SV=1	355	141.354	2.59409e-35	34.86	-1	3093	3740	0	20	235
TRINITY_DN7011_c0_g1	1	3849	408	28.29	88.97	sp|O94530|SUA5_SCHPO Threonylcarbamoyl-AMP synthase OS=Schizosaccharomyces pombe (strain 972 / ATCC 24843) GN=sua5 PE=3 SV=1	650	254.988	3.98313e-73	42.97	3	156	1244	0	38	400
TRINITY_DN7980_c0_g1	1	3777	378	10.72	33.07	sp|O94305|MGLL_SCHPO Putative monoglyceride lipase OS=Schizosaccharomyces pombe (strain 972 / ATCC 24843) GN=SPCC5E4.05c PE=1 SV=1	161	66.6254	3.48182e-13	35.04	-1	778	1182	0	4	128
TRINITY_DN8965_c0_g1	1	3700	340	18.16	65.88	sp|Q6C7A6|NBP35_YARLI Cytosolic Fe-S cluster assembly factor NBP35 OS=Yarrowia lipolytica (strain CLIB 122 / E 150) GN=NBP35 PE=3 SV=1	905	353.214	2.79747e-127	71.88	-1	2663	3334	0	104	327
TRINITY_DN9280_c0_g2	1	3628	446	24.89	67.49	sp|P40233|CKI1_SCHPO Casein kinase I homolog 1 OS=Schizosaccharomyces pombe (strain 972 / ATCC 24843) GN=cki1 PE=1 SV=2	1342	521.546	2.40998e-171	77.41	-2	757	1659	0	6	306
TRINITY_DN9316_c0_g1	1	3502	431	12.34	26.45	sp|P22007|FNTB_YEAST Protein farnesyltransferase subunit beta OS=Saccharomyces cerevisiae (strain ATCC 204508 / S288c) GN=RAM1 PE=1 SV=2	287	115.161	1.27128e-39	46.53	-1	500	931	0	212	325
TRINITY_DN7557_c0_g2	1	3463	1029	45.65	45.87	sp|Q99126|CHS3_USTMA Chitin synthase 3 OS=Ustilago maydis (strain 521 / FGSC 9021) GN=CHS3 PE=3 SV=2	1336	519.235	9.72373e-166	52.15	2	5	1585	0	412	883
TRINITY_DN9015_c0_g2	1	3397	549	18.9	40.26	sp|O31826|YNGI_BACSU Putative acyl-CoA synthetase YngI OS=Bacillus subtilis (strain 168) GN=yngI PE=3 SV=1	295	118.242	9.54667e-33	34.23	1	136	777	0	230	450
TRINITY_DN8908_c1_g1	1	3335	257	7.2	30.74	sp|Q7RXQ8|HIS4_NEUCR 1-(5-phosphoribosyl)-5-[(5-phosphoribosylamino)methylideneamino] imidazole-4-carboxamide isomerase OS=Neurospora crassa (strain ATCC 24698 / 74-OR23-1A / CBS 708.71 / DSM 1257 / FGSC 987) GN=his-7 PE=3 SV=1	278	111.694	3.10734e-25	66.25	3	3054	3293	0	2	80
TRINITY_DN4986_c0_g1	1	3293	768	42.91	56.12	sp|P0CM51|BST1_CRYNB GPI inositol-deacylase OS=Cryptococcus neoformans var. neoformans serotype D (strain B-3501A) GN=BST1 PE=3 SV=1	553	217.624	1.21621e-57	32.73	1	43	1455	0	35	465
TRINITY_DN8815_c0_g1	1	3205	2699	39.31	17.38	sp|Q6LA55|YF49_SCHPO UPF0648 protein C3H5.09c OS=Schizosaccharomyces pombe (strain 972 / ATCC 24843) GN=SPAC3H5.09c PE=3 SV=2	315	125.946	1.07867e-27	27.27	-1	23	1282	0	840	1308
TRINITY_DN3644_c0_g2	1	3051	1960	56.83	29.34	sp|Q8VDD5|MYH9_MOUSE Myosin-9 OS=Mus musculus GN=Myh9 PE=1 SV=4	1457	565.844	0	49.31	-3	446	2179	0	318	892
TRINITY_DN6374_c1_g1	1	3018	408	26.04	57.35	sp|Q9HEZ1|XYNA_PHACH Endo-1,4-beta-xylanase A OS=Phanerochaete chrysosporium GN=xynA PE=1 SV=1	606	238.039	4.83758e-89	55.13	-1	1702	2487	0	142	375
TRINITY_DN3862_c0_g1	1	2980	721	40.87	55.76	sp|P47075|VTC4_YEAST Vacuolar transporter chaperone 4 OS=Saccharomyces cerevisiae (strain ATCC 204508 / S288c) GN=VTC4 PE=1 SV=2	1382	536.954	7.68843e-176	64.29	1	622	1839	0	99	500
TRINITY_DN8803_c0_g1	1	2917	499	6.89	13.43	sp|A1CNV1|DML1_ASPCL Protein dml1 OS=Aspergillus clavatus (strain ATCC 1007 / CBS 513.65 / DSM 816 / NCTC 3887 / NRRL 1) GN=dml1 PE=3 SV=1	198	80.8777	3.04279e-29	49.25	-3	2595	2795	0	1	67
TRINITY_DN9055_c1_g1	1	2882	848	18.84	18.28	sp|Q6ZI17|OML2_ORYSJ Protein MEI2-like 2 OS=Oryza sativa subsp. japonica GN=ML2 PE=2 SV=1	219	88.9669	1.09875e-16	33.33	-2	1328	1870	0	184	338
TRINITY_DN8105_c0_g2	1	2819	1039	73.54	61.12	sp|O42668|TPR1_SCHPO Tetratricopeptide repeat protein 1 OS=Schizosaccharomyces pombe (strain 972 / ATCC 24843) GN=tpr1 PE=1 SV=1	727	284.648	2.04447e-79	31.01	1	1	2073	0	180	814
TRINITY_DN5972_c0_g1	1	2789	555	19.25	32.25	sp|Q9UW26|PAPA_CANAL Poly(A) polymerase PAPa OS=Candida albicans (strain SC5314 / ATCC MYA-2876) GN=PAPA PE=3 SV=1	523	206.068	8.84824e-125	52.51	-2	1739	2275	0	43	221
TRINITY_DN8629_c1_g1	1	2761	283	24.88	67.84	sp|Q9USK6|CBP3_SCHPO CBP3-like protein OS=Schizosaccharomyces pombe (strain 972 / ATCC 24843) GN=cbp3 PE=3 SV=1	204	83.1889	6.42062e-16	27.31	-3	1323	2009	0	87	278
TRINITY_DN3303_c0_g1	1	2723	1966	23.91	10.22	sp|Q54S77|VPS15_DICDI Probable serine/threonine-protein kinase vps15 OS=Dictyostelium discoideum GN=vps15 PE=3 SV=1	330	131.724	1.16412e-29	35.16	2	1418	2068	0	1445	1645
TRINITY_DN8256_c0_g1	1	2685	312	20.34	58.33	sp|Q54RD6|PP2AB_DICDI Protein phosphatase 2A catalytic subunit B OS=Dictyostelium discoideum GN=pho2B PE=1 SV=1	677	265.388	8.66058e-109	65.93	2	47	592	0	4	185
TRINITY_DN6544_c0_g1	1	2666	4910	84.06	14.73	sp|Q12019|MDN1_YEAST Midasin OS=Saccharomyces cerevisiae (strain ATCC 204508 / S288c) GN=MDN1 PE=1 SV=1	460	181.8	3.14019e-45	24.87	2	14	2254	0	3021	3743
TRINITY_DN6287_c0_g2	1	2644	265	7.94	26.42	sp|P06774|HAP2_YEAST Transcriptional activator HAP2 OS=Saccharomyces cerevisiae (strain ATCC 204508 / S288c) GN=HAP2 PE=1 SV=1	291	116.701	5.38594e-27	77.14	2	1691	1900	0	156	225
TRINITY_DN8509_c0_g1	1	2619	359	35.28	72.42	sp|Q00216|TIGA_ASPNG Protein disulfide-isomerase tigA OS=Aspergillus niger GN=tigA PE=2 SV=1	422	167.162	4.58647e-71	38.83	2	413	1336	0	98	357
TRINITY_DN8862_c0_g1	1	2595	427	24.28	48.95	sp|J4VWM7|OPS4_BEAB2 FAD-dependent monooxygenase OpS4 OS=Beauveria bassiana (strain ARSEF 2860) GN=OpS4 PE=1 SV=1	215	87.4261	9.48371e-17	30.84	-2	993	1622	0	8	216
TRINITY_DN4314_c0_g2	1	2572	436	29.39	54.36	sp|P32335|MSS51_YEAST Protein MSS51, mitochondrial OS=Saccharomyces cerevisiae (strain ATCC 204508 / S288c) GN=MSS51 PE=1 SV=2	457	180.644	9.15241e-48	42.19	3	246	1001	0	59	295
TRINITY_DN8086_c0_g1	1	2505	1000	43.71	34.7	sp|O74945|RIA1_SCHPO Ribosome assembly protein 1 OS=Schizosaccharomyces pombe (strain 972 / ATCC 24843) GN=ria1 PE=3 SV=1	705	276.174	5.87681e-112	42.55	1	1	1095	0	300	646
TRINITY_DN5013_c0_g1	1	2479	4882	19.24	2.81	sp|O88738|BIRC6_MOUSE Baculoviral IAP repeat-containing protein 6 OS=Mus musculus GN=Birc6 PE=1 SV=2	364	144.821	8.27713e-34	45.91	-2	649	1125	0	4635	4771
TRINITY_DN5591_c0_g1	1	2461	504	31.82	52.18	sp|Q9URX1|YLX5_SCHPO UNC93-like protein C922.05c OS=Schizosaccharomyces pombe (strain 972 / ATCC 24843) GN=SPAC922.05c PE=3 SV=1	562	221.09	2.02556e-61	47.55	2	1367	2149	0	223	485
TRINITY_DN7259_c0_g2	1	2440	445	29.75	55.51	sp|Q59WH0|ADA2_CANAL Transcriptional adapter 2 OS=Candida albicans (strain SC5314 / ATCC MYA-2876) GN=ADA2 PE=3 SV=2	315	125.946	2.94126e-29	35.14	2	1181	1906	0	196	442
TRINITY_DN6922_c0_g1	1	2422	770	49.05	45.45	sp|D4ATR3|A7629_ARTBC Uncharacterized secreted glycosidase ARB_07629 OS=Arthroderma benhamiae (strain ATCC MYA-4681 / CBS 112371) GN=ARB_07629 PE=1 SV=1	422	167.162	1.08484e-41	29.9	3	939	2126	0	48	397
TRINITY_DN8461_c0_g2	1	2403	579	13.11	18.31	sp|O60508|PRP17_HUMAN Pre-mRNA-processing factor 17 OS=Homo sapiens GN=CDC40 PE=1 SV=1	361	143.665	1.4164e-34	64.15	-2	1980	2294	0	474	579
TRINITY_DN7952_c0_g1	1	2358	1037	84.22	57.38	sp|P22189|ATC3_SCHPO Calcium-transporting ATPase 3 OS=Schizosaccharomyces pombe (strain 972 / ATCC 24843) GN=cta3 PE=1 SV=1	1393	541.191	3.15277e-176	44.1	-2	6	1991	0	271	865
TRINITY_DN6417_c0_g1	1	2332	1401	25.99	13.99	sp|O09053|WRN_MOUSE Werner syndrome ATP-dependent helicase homolog OS=Mus musculus GN=Wrn PE=1 SV=3	244	98.5969	1.03075e-19	33.01	-2	1585	2190	0	508	703
TRINITY_DN8438_c0_g2	1	2273	544	23.36	32.17	sp|P36616|DSK1_SCHPO Protein kinase dsk1 OS=Schizosaccharomyces pombe (strain 972 / ATCC 24843) GN=dsk1 PE=3 SV=2	464	183.341	3.01815e-48	50.28	-1	630	1160	0	347	521
TRINITY_DN7491_c0_g1	1	2254	465	21.56	33.98	sp|P0CP43|OXR1_CRYNB Oxidation resistance protein 1 OS=Cryptococcus neoformans var. neoformans serotype D (strain B-3501A) GN=OXR1 PE=3 SV=1	288	115.546	6.21484e-26	45.12	-3	195	680	0	301	458
TRINITY_DN9002_c0_g2	1	2238	611	51.88	63.01	sp|Q10499|AIF1_SCHPO Apoptosis-inducing factor 1 OS=Schizosaccharomyces pombe (strain 972 / ATCC 24843) GN=aif1 PE=3 SV=3	542	213.386	4.32385e-58	36.05	-1	1078	2238	0	120	504
TRINITY_DN6251_c0_g1	1	2176	810	43.84	32.22	sp|Q9FFR9|CHX18_ARATH Cation/H(+) antiporter 18 OS=Arabidopsis thaliana GN=CHX18 PE=2 SV=1	175	72.0182	8.21313e-19	21.62	-3	921	1874	0	404	664
TRINITY_DN8299_c0_g1	1	2157	259	22.11	64.86	sp|Q10102|YAQ1_SCHPO Uncharacterized protein C18G6.01c OS=Schizosaccharomyces pombe (strain 972 / ATCC 24843) GN=SPAC18G6.01c PE=4 SV=1	162	67.0106	5.93784e-11	32.42	2	326	802	0	66	233
TRINITY_DN8763_c1_g1	1	2145	352	29.37	62.5	sp|Q9PUB8|S39A7_DANRE Zinc transporter Slc39a7 (Fragment) OS=Danio rerio GN=slc39a7 PE=2 SV=1	261	105.145	6.5335e-23	33.19	-2	1104	1733	0	127	346
TRINITY_DN8094_c0_g1	1	2127	758	23.27	16.75	sp|P27730|CAN_SCHMA Calpain OS=Schistosoma mansoni PE=2 SV=1	229	92.8189	3.12597e-33	37.43	1	667	1161	0	135	261
TRINITY_DN6784_c0_g1	1	2092	693	94.07	99.42	sp|P0CP30|NPL4_CRYNJ Nuclear protein localization protein 4 OS=Cryptococcus neoformans var. neoformans serotype D (strain JEC21 / ATCC MYA-565) GN=NPL4 PE=3 SV=1	1510	586.26	0	45.77	-2	79	2046	0	3	691
TRINITY_DN5634_c0_g1	1	2075	301	38.75	89.7	sp|Q8HXY2|MCAT_MACFA Mitochondrial carnitine/acylcarnitine carrier protein OS=Macaca fascicularis GN=SLC25A20 PE=2 SV=1	634	248.825	1.41185e-74	48	3	447	1250	0	26	295
TRINITY_DN7251_c0_g1	1	2041	339	20.43	41	sp|Q1QEC2|LPLA_PSYCK Lipoate-protein ligase A OS=Psychrobacter cryohalolentis (strain K5) GN=lplA PE=3 SV=1	334	133.265	2.04123e-45	43.17	-2	871	1287	0	23	161
TRINITY_DN7422_c0_g1	1	2026	465	27.39	40.22	sp|Q50I20|PRPC_ASPFM 2-methylcitrate synthase, mitochondrial OS=Neosartorya fumigata GN=mcsA PE=1 SV=1	582	228.794	3.33183e-95	63.64	2	485	1039	0	236	422
TRINITY_DN9192_c1_g3	1	2010	1023	11.49	6.26	sp|Q54JS5|WDR24_DICDI GATOR complex protein WDR24 OS=Dictyostelium discoideum GN=wdr24 PE=3 SV=1	111	47.3654	3.59426e-07	27.27	3	1608	1838	0	942	1005
TRINITY_DN8224_c0_g2	1	1981	590	46.19	51.69	sp|P15710|PHO4_NEUCR Phosphate-repressible phosphate permease pho-4 OS=Neurospora crassa (strain ATCC 24698 / 74-OR23-1A / CBS 708.71 / DSM 1257 / FGSC 987) GN=pho-4 PE=1 SV=1	550	216.468	8.77201e-60	40.65	3	867	1781	0	3	307
TRINITY_DN9243_c1_g1	1	1967	407	46.98	83.54	sp|O59721|PUS4_SCHPO Probable tRNA pseudouridine synthase 4 OS=Schizosaccharomyces pombe (strain 972 / ATCC 24843) GN=SPBC11C11.10 PE=1 SV=2	446	176.407	3.66991e-47	34.26	-2	929	1852	0	51	390
TRINITY_DN6622_c0_g1	1	1849	837	40.72	30.94	sp|Q8C079|STRP1_MOUSE Striatin-interacting protein 1 OS=Mus musculus GN=Strip1 PE=1 SV=2	223	90.5077	1.67318e-17	29.52	-3	894	1646	0	69	327
TRINITY_DN8654_c0_g1	1	1837	365	7.19	12.05	sp|P78814|SRP2_SCHPO Pre-mRNA-splicing factor srp2 OS=Schizosaccharomyces pombe (strain 972 / ATCC 24843) GN=srp2 PE=1 SV=2	137	57.3806	1.2109e-13	50	-1	1688	1819	0	5	48
TRINITY_DN4203_c0_g1	1	1774	372	26.21	41.4	sp|Q9UT09|AROG_SCHPO Phospho-2-dehydro-3-deoxyheptonate aldolase, tyrosine-inhibited OS=Schizosaccharomyces pombe (strain 972 / ATCC 24843) GN=aro4 PE=3 SV=1	413	163.696	4.11194e-95	47.74	-2	943	1407	0	14	167
TRINITY_DN1145_c0_g1	1	1764	332	22.79	34.94	sp|O74480|YQJ7_SCHPO Uncharacterized protein C1840.07c OS=Schizosaccharomyces pombe (strain 972 / ATCC 24843) GN=SPCC1840.07c PE=3 SV=1	209	85.1149	1.29038e-16	35.07	1	802	1203	0	197	312
TRINITY_DN3725_c0_g1	1	1739	1729	31.05	10.41	sp|Q05022|RRP5_YEAST rRNA biogenesis protein RRP5 OS=Saccharomyces cerevisiae (strain ATCC 204508 / S288c) GN=RRP5 PE=1 SV=1	484	191.045	1.5267e-72	50.83	-3	427	966	0	1445	1624
TRINITY_DN8203_c0_g1	1	1707	587	83.13	82.11	sp|P25297|PHO84_YEAST Inorganic phosphate transporter PHO84 OS=Saccharomyces cerevisiae (strain ATCC 204508 / S288c) GN=PHO84 PE=1 SV=2	1153	448.743	5.32102e-149	49.09	-2	288	1706	0	78	559
TRINITY_DN482_c0_g1	1	1693	800	75.84	46.88	sp|Q6DRN3|NOC3L_DANRE Nucleolar complex protein 3 homolog OS=Danio rerio GN=noc3l PE=2 SV=1	457	180.644	2.8687e-47	33.88	1	4	1287	0	338	712
TRINITY_DN3112_c0_g1	1	1683	469	16.58	19.83	sp|O13943|AVL9_SCHPO Late secretory pathway protein avl9 OS=Schizosaccharomyces pombe (strain 972 / ATCC 24843) GN=avl9 PE=3 SV=2	192	78.5666	3.84667e-32	35.48	2	530	808	0	345	437
TRINITY_DN7512_c0_g1	1	1649	547	69.5	67.09	sp|P32020|NLTP_MOUSE Non-specific lipid-transfer protein OS=Mus musculus GN=Scp2 PE=1 SV=3	1064	414.461	1.76521e-136	56.4	1	238	1383	0	38	404
TRINITY_DN5021_c0_g1	1	1636	605	54.46	44.13	sp|Q8H1D9|TYDP1_ARATH Tyrosyl-DNA phosphodiesterase 1 OS=Arabidopsis thaliana GN=TDP1 PE=1 SV=1	164	67.781	1.32122e-10	24.25	-3	93	983	0	168	434
TRINITY_DN5104_c0_g1	1	1625	4646	99.88	11.88	sp|Q14204|DYHC1_HUMAN Cytoplasmic dynein 1 heavy chain 1 OS=Homo sapiens GN=DYNC1H1 PE=1 SV=5	1879	728.398	0	63.72	-2	2	1624	0	1489	2040
TRINITY_DN9359_c0_g1	1	1596	349	42.86	69.05	sp|P53199|ERG26_YEAST Sterol-4-alpha-carboxylate 3-dehydrogenase, decarboxylating OS=Saccharomyces cerevisiae (strain ATCC 204508 / S288c) GN=ERG26 PE=1 SV=1	561	220.705	1.14711e-64	50	-3	836	1519	0	3	243
TRINITY_DN6662_c0_g1	1	1586	340	55.04	78.53	sp|Q9URX7|ANM1_SCHPO Protein arginine N-methyltransferase 1 OS=Schizosaccharomyces pombe (strain 972 / ATCC 24843) GN=rmt1 PE=1 SV=2	731	286.189	7.81022e-90	48.66	-3	373	1245	0	74	340
TRINITY_DN4973_c0_g1	1	1549	341	52.87	80.65	sp|Q06138|CAB39_MOUSE Calcium-binding protein 39 OS=Mus musculus GN=Cab39 PE=1 SV=2	808	315.849	1.97964e-101	58.91	-2	448	1266	0	39	313
TRINITY_DN8718_c0_g3	1	1521	403	52.47	69.48	sp|Q4PI64|EIF3H_USTMA Eukaryotic translation initiation factor 3 subunit H OS=Ustilago maydis (strain 521 / FGSC 9021) GN=UMAG_00199 PE=3 SV=1	573	225.328	3.89335e-66	45.36	-2	54	851	0	120	399
TRINITY_DN8863_c0_g1	1	1491	342	10.66	15.5	sp|P47173|YJ9J_YEAST Uncharacterized protein YJR142W OS=Saccharomyces cerevisiae (strain ATCC 204508 / S288c) GN=YJR142W PE=1 SV=1	146	60.8474	4.46649e-18	45.28	-2	597	755	0	185	237
TRINITY_DN3783_c0_g1	1	1471	450	38.75	41.11	sp|Q6N075|MFSD5_HUMAN Molybdate-anion transporter OS=Homo sapiens GN=MFSD5 PE=1 SV=2	146	60.8474	1.29809e-08	30.46	-2	895	1464	0	249	433
TRINITY_DN7656_c0_g1	1	1448	346	63.4	80.92	sp|Q6DIQ3|PP1R7_XENTR Protein phosphatase 1 regulatory subunit 7 OS=Xenopus tropicalis GN=ppp1r7 PE=2 SV=1	502	197.978	9.62258e-57	48.69	-3	145	1062	0	66	345
TRINITY_DN6303_c0_g2	1	1420	1498	77.11	23.77	sp|Q7LHG5|YI31B_YEAST Transposon Ty3-I Gag-Pol polyprotein OS=Saccharomyces cerevisiae (strain ATCC 204508 / S288c) GN=TY3B-I PE=3 SV=2	444	175.637	2.41428e-45	29.3	3	201	1295	0	1100	1455
TRINITY_DN5143_c0_g1	1	1408	339	38.78	56.93	sp|P0CM36|ATG5_CRYNJ Autophagy protein 5 OS=Cryptococcus neoformans var. neoformans serotype D (strain JEC21 / ATCC MYA-565) GN=ATG5 PE=3 SV=1	313	125.176	1.42304e-38	37.76	3	66	611	0	9	201
TRINITY_DN7851_c0_g1	1	1376	255	63.44	88.63	sp|P71534|FABG_MYCS2 3-oxoacyl-[acyl-carrier-protein] reductase FabG OS=Mycobacterium smegmatis (strain ATCC 700084 / mc(2)155) GN=fabG PE=3 SV=2	167	68.9366	8.272e-12	25.34	-2	179	1051	0	26	251
TRINITY_DN6638_c0_g1	1	1367	395	59.03	66.84	sp|Q1MTP1|THP3_SCHPO THP3 homolog C2A9.11c OS=Schizosaccharomyces pombe (strain 972 / ATCC 24843) GN=SPBC2A9.11c PE=3 SV=1	637	249.98	4.21362e-76	50.37	3	297	1103	0	132	395
TRINITY_DN4647_c0_g1	1	1357	297	45.54	69.36	sp|B0D5R2|COQ4_LACBS Ubiquinone biosynthesis protein COQ4, mitochondrial OS=Laccaria bicolor (strain S238N-H82 / ATCC MYA-4686) GN=COQ4 PE=3 SV=1	903	352.443	3.20034e-117	77.67	-2	469	1086	0	83	288
TRINITY_DN4228_c0_g1	1	1348	754	12.69	7.69	sp|Q4WJ81|CRZA_ASPFU C2H2 finger domain transcription factor crzA OS=Neosartorya fumigata (strain ATCC MYA-4609 / Af293 / CBS 101355 / FGSC A1100) GN=crzA PE=1 SV=1	132	55.4546	6.73468e-07	43.1	-3	468	638	0	538	595
TRINITY_DN8177_c0_g3	1	1341	410	56.38	61.71	sp|O94354|ASSY_SCHPO Argininosuccinate synthase OS=Schizosaccharomyces pombe (strain 972 / ATCC 24843) GN=arg12 PE=3 SV=1	860	335.88	3.46002e-109	62.85	-1	586	1341	0	149	401
TRINITY_DN2352_c0_g1	1	1317	264	57.63	98.86	sp|Q00791|STCU_EMENI Versicolorin reductase OS=Emericella nidulans (strain FGSC A4 / ATCC 38163 / CBS 112.46 / NRRL 194 / M139) GN=stcU PE=3 SV=2	369	146.747	7.29626e-39	40.15	1	409	1167	0	1	261
TRINITY_DN8092_c0_g4	1	1310	587	68.47	51.62	sp|P32891|DLD1_YEAST D-lactate dehydrogenase [cytochrome] 1, mitochondrial OS=Saccharomyces cerevisiae (strain ATCC 204508 / S288c) GN=DLD1 PE=1 SV=2	648	254.218	5.4429e-76	44.08	2	320	1216	0	279	581
TRINITY_DN8931_c1_g5	1	1303	500	32.69	27.2	sp|S0E3D0|GA2_GIBF5 Ent-kaurene oxidase P450-4 OS=Gibberella fujikuroi (strain CBS 195.34 / IMI 58289 / NRRL A-6831) GN=P450-4 PE=1 SV=1	112	47.7506	2.50745e-12	24.83	-1	224	649	0	165	300
TRINITY_DN7597_c0_g3	1	1294	527	38.95	29.41	sp|Q09833|YAD7_SCHPO tRNA (uracil(54)-C(5))-methyltransferase OS=Schizosaccharomyces pombe (strain 972 / ATCC 24843) GN=SPAC4G8.07c PE=3 SV=1	352	140.198	4.99903e-35	45.83	1	790	1293	0	121	275
TRINITY_DN4394_c0_g2	1	1261	789	38.54	20.15	sp|P39533|ACON2_YEAST Homocitrate dehydratase, mitochondrial OS=Saccharomyces cerevisiae (strain ATCC 204508 / S288c) GN=ACO2 PE=1 SV=1	434	171.785	2.36715e-45	53.29	-3	774	1259	0	624	782
TRINITY_DN7833_c0_g1	1	1240	579	39.92	29.19	sp|O00519|FAAH1_HUMAN Fatty-acid amide hydrolase 1 OS=Homo sapiens GN=FAAH PE=1 SV=2	271	108.997	4.23144e-27	47.93	-3	618	1112	0	164	332
TRINITY_DN2459_c0_g2	1	1224	1212	77.7	28.55	sp|B2RRD7|BRPF1_MOUSE Peregrin OS=Mus musculus GN=Brpf1 PE=1 SV=1	346	137.887	2.17512e-33	29.48	2	2	952	0	383	728
TRINITY_DN7871_c1_g1	1	1211	539	46.82	33.02	sp|Q9USK3|YJ2D_SCHPO Uncharacterized transporter C4B3.13 OS=Schizosaccharomyces pombe (strain 972 / ATCC 24843) GN=SPCC4B3.13 PE=3 SV=1	258	103.99	3.31107e-25	35.03	1	493	1059	0	60	237
TRINITY_DN7787_c0_g4	1	1189	54	11.61	87.04	sp|P74805|Y1169_SYNY3 UPF0057 membrane protein ssr1169 OS=Synechocystis sp. (strain PCC 6803 / Kazusa) GN=ssr1169 PE=3 SV=2	117	49.6766	1.87767e-06	53.19	2	104	241	0	3	49
TRINITY_DN5273_c0_g1	1	1175	308	21.19	27.27	sp|P52578|IFRH_SOLTU Isoflavone reductase homolog OS=Solanum tuberosum PE=2 SV=1	132	55.4546	2.98575e-07	39.53	1	43	291	0	1	84
TRINITY_DN7544_c0_g1	1	1169	193	16.94	34.2	sp|Q9C3Y4|RHOA_EMENI GTP-binding protein rhoA OS=Emericella nidulans (strain FGSC A4 / ATCC 38163 / CBS 112.46 / NRRL 194 / M139) GN=rhoA PE=3 SV=1	350	139.428	2.06859e-37	100	-1	636	833	0	33	98
TRINITY_DN3218_c0_g1	1	1159	483	40.12	31.06	sp|O42956|ART1_SCHPO Arrestin family protein 1 OS=Schizosaccharomyces pombe (strain 972 / ATCC 24843) GN=art1 PE=3 SV=1	135	56.6102	1.74878e-07	26.71	2	515	979	0	210	359
TRINITY_DN7172_c0_g2	1	1153	773	23.42	11.64	sp|Q01738|CDH_PHACH Cellobiose dehydrogenase OS=Phanerochaete chrysosporium GN=CDH-1 PE=1 SV=1	301	120.553	3.8633e-28	63.33	-2	79	348	0	24	113
TRINITY_DN6630_c0_g2	1	1136	291	51.23	63.92	sp|Q4WVS2|BCP1_ASPFU Protein bcp1 OS=Neosartorya fumigata (strain ATCC MYA-4609 / Af293 / CBS 101355 / FGSC A1100) GN=bcp1 PE=3 SV=2	243	98.2117	1.85524e-42	33.66	-2	77	658	0	100	285
TRINITY_DN2613_c0_g1	1	1113	250	29.38	40.8	sp|Q9HE10|DSC3_SCHPO DSC E3 ubiquitin ligase complex subunit 3 OS=Schizosaccharomyces pombe (strain 972 / ATCC 24843) GN=dsc3 PE=1 SV=1	114	48.521	1.74626e-10	32.46	-3	725	1051	0	10	111
TRINITY_DN6846_c0_g1	1	1083	570	61.22	39.12	sp|Q5PPG7|EIF2D_RAT Eukaryotic translation initiation factor 2D OS=Rattus norvegicus GN=Eif2d PE=1 SV=1	210	85.5001	8.54486e-19	30.67	-2	75	737	0	67	289
TRINITY_DN4549_c0_g1	1	1042	425	24.76	20.47	sp|A8NE23|COP3_COPC7 Alpha-muurolene synthase OS=Coprinopsis cinerea (strain Okayama-7 / 130 / ATCC MYA-4618 / FGSC 9003) GN=COP3 PE=1 SV=1	214	87.0409	1.06439e-17	49.43	1	784	1041	0	17	103
TRINITY_DN8550_c1_g4	1	1036	1230	36.2	10.08	sp|Q5R6L5|CAND1_PONAB Cullin-associated NEDD8-dissociated protein 1 OS=Pongo abelii GN=CAND1 PE=2 SV=1	209	85.1149	1.10849e-16	36	-3	459	833	0	188	311
TRINITY_DN4619_c0_g1	1	1013	491	33.46	23.01	sp|Q9USN4|YJA1_SCHPO Uncharacterized transporter C1529.01 OS=Schizosaccharomyces pombe (strain 972 / ATCC 24843) GN=SPCC1529.01 PE=3 SV=2	274	110.153	1.74374e-25	44.25	2	674	1012	0	33	145
TRINITY_DN2577_c0_g1	1	1001	605	27.27	15.21	sp|P33886|WIS1_SCHPO Protein kinase wis1 OS=Schizosaccharomyces pombe (strain 972 / ATCC 24843) GN=wis1 PE=1 SV=1	310	124.02	6.82968e-47	65.22	-2	2	274	0	349	440
TRINITY_DN7376_c0_g1	1	971	162	38.31	76.54	sp|Q9P7N2|AP1S1_SCHPO AP-1 complex subunit sigma-1 OS=Schizosaccharomyces pombe (strain 972 / ATCC 24843) GN=vas2 PE=1 SV=1	399	158.303	2.0533e-45	57.26	1	217	588	0	12	135
TRINITY_DN6230_c0_g2	1	954	707	77.36	34.79	sp|P46598|HSP90_CANAL Heat shock protein 90 homolog OS=Candida albicans (strain SC5314 / ATCC MYA-2876) GN=HSP90 PE=3 SV=1	822	321.242	5.90362e-102	66.4	-3	215	952	0	431	676
TRINITY_DN5479_c0_g2	1	933	670	71.38	35.37	sp|C5FHK0|SED1_ARTOC Tripeptidyl-peptidase SED1 OS=Arthroderma otae (strain ATCC MYA-4605 / CBS 113480) GN=SED1 PE=3 SV=1	408	161.77	1.24818e-49	42.86	-3	2	667	0	304	540
TRINITY_DN6415_c0_g3	1	923	225	68.26	90.22	sp|Q9CQI7|RU2B_MOUSE U2 small nuclear ribonucleoprotein B&apos;&apos; OS=Mus musculus GN=Snrpb2 PE=1 SV=1	372	147.902	7.15525e-41	39.91	-2	290	919	0	23	225
TRINITY_DN5964_c0_g1	1	894	984	80.54	24.49	sp|O94316|SN114_SCHPO Pre-mRNA-splicing factor cwf10 OS=Schizosaccharomyces pombe (strain 972 / ATCC 24843) GN=cwf10 PE=1 SV=2	550	216.468	4.66092e-62	47.18	2	149	868	0	7	247
TRINITY_DN1751_c0_g1	1	890	206	65.73	93.69	sp|B8DN97|RL4_DESVM 50S ribosomal protein L4 OS=Desulfovibrio vulgaris (strain Miyazaki F / DSM 19637) GN=rplD PE=3 SV=1	353	140.584	1.68543e-38	39.49	-3	40	624	0	13	205
TRINITY_DN5471_c0_g1	1	884	611	22.4	10.8	sp|O94242|SYDM_SCHPO Aspartate--tRNA ligase, mitochondrial OS=Schizosaccharomyces pombe (strain 972 / ATCC 24843) GN=msd1 PE=3 SV=1	207	84.3445	2.5143e-36	54.55	2	458	655	0	489	554
TRINITY_DN5641_c0_g1	1	874	1001	54.92	18.88	sp|Q13472|TOP3A_HUMAN DNA topoisomerase 3-alpha OS=Homo sapiens GN=TOP3A PE=1 SV=1	139	58.151	3.51282e-08	28.12	2	119	598	0	811	999
TRINITY_DN8071_c0_g2	1	860	496	57.91	28.02	sp|Q54PX0|Y4251_DICDI Probable serine/threonine-protein kinase DDB_G0284251 OS=Dictyostelium discoideum GN=DDB_G0284251 PE=3 SV=1	170	70.0922	3.02185e-12	27.71	-1	66	563	0	42	180
TRINITY_DN6067_c0_g1	1	849	2670	47.35	4.94	sp|Q10105|GCN1_SCHPO eIF-2-alpha kinase activator gcn1 OS=Schizosaccharomyces pombe (strain 972 / ATCC 24843) GN=gcn1 PE=3 SV=1	189	77.411	1.84661e-14	35.07	-1	91	492	0	746	877
TRINITY_DN9349_c0_g2	1	837	375	81.72	61.07	sp|P78605|OTC_TRAHI Ornithine carbamoyltransferase, mitochondrial OS=Trametes hirsuta PE=3 SV=1	914	356.681	2.41159e-120	76.62	1	154	837	0	55	283
TRINITY_DN8923_c0_g9	1	831	424	87.73	55.9	sp|O13716|AGN1_SCHPO Glucan endo-1,3-alpha-glucosidase agn1 OS=Schizosaccharomyces pombe (strain 972 / ATCC 24843) GN=agn1 PE=1 SV=2	367	145.976	7.70493e-39	36.4	-3	101	829	0	183	419
TRINITY_DN3426_c0_g3	1	826	3744	83.54	6.3	sp|P38811|TRA1_YEAST Transcription-associated protein 1 OS=Saccharomyces cerevisiae (strain ATCC 204508 / S288c) GN=TRA1 PE=1 SV=1	355	141.354	1.97504e-35	32.39	2	77	766	0	3509	3744
TRINITY_DN4047_c0_g1	1	821	1199	28.5	6.51	sp|Q9UTN6|SNF21_SCHPO Chromatin structure-remodeling complex subunit snf21 OS=Schizosaccharomyces pombe (strain 972 / ATCC 24843) GN=snf21 PE=1 SV=1	178	73.1738	3.03502e-13	43.59	2	293	526	0	1085	1162
TRINITY_DN3699_c0_g1	1	814	520	29.12	14.23	sp|Q01679|LAC1_PHLRA Laccase OS=Phlebia radiata GN=LAC PE=1 SV=2	135	56.6102	7.45583e-08	45.57	3	576	812	0	1	74
TRINITY_DN2130_c0_g1	1	806	250	85.61	88.4	sp|P52427|PSA4_SPIOL Proteasome subunit alpha type-4 OS=Spinacia oleracea GN=PAC1 PE=2 SV=1	623	244.588	2.07633e-78	54.35	-2	116	805	0	28	248
TRINITY_DN6736_c0_g1	1	802	509	24.69	13.16	sp|O48922|C98A2_SOYBN Cytochrome P450 98A2 OS=Glycine max GN=CYP98A2 PE=2 SV=1	145	60.4622	3.49736e-09	40.3	2	143	340	0	369	435
TRINITY_DN2416_c0_g1	1	758	764	63.32	21.73	sp|Q9UT19|METE_SCHPO Probable 5-methyltetrahydropteroyltriglutamate--homocysteine methyltransferase OS=Schizosaccharomyces pombe (strain 972 / ATCC 24843) GN=met26 PE=1 SV=1	483	190.66	4.81297e-54	63.25	-2	2	481	0	1	166
TRINITY_DN8041_c1_g1	1	753	700	25.1	9	sp|Q95RJ9|EBI_DROME F-box-like/WD repeat-containing protein ebi OS=Drosophila melanogaster GN=ebi PE=1 SV=2	149	62.003	9.12228e-10	44.44	-3	488	676	0	1	63
TRINITY_DN6179_c0_g1	1	743	1094	81.97	18.37	sp|Q23915|KINX_DICDI Probable serine/threonine-protein kinase kinX OS=Dictyostelium discoideum GN=kinX PE=3 SV=2	453	179.104	2.98142e-49	44.44	3	72	680	0	17	217
TRINITY_DN2475_c0_g1	1	711	1083	29.54	6.28	sp|Q9C0H5|RHG39_HUMAN Rho GTPase-activating protein 39 OS=Homo sapiens GN=ARHGAP39 PE=1 SV=2	144	60.077	3.44423e-09	40	3	498	707	0	30	97
TRINITY_DN4983_c0_g3	1	704	1661	99.72	13.97	sp|P32386|YBT1_YEAST ATP-dependent bile acid permease OS=Saccharomyces cerevisiae (strain ATCC 204508 / S288c) GN=YBT1 PE=1 SV=2	428	169.474	8.46345e-46	35.71	2	2	703	0	1168	1399
TRINITY_DN3452_c0_g1	1	699	196	48.5	42.86	sp|Q498C8|RER1_RAT Protein RER1 OS=Rattus norvegicus GN=Rer1 PE=1 SV=1	230	93.2041	1.52125e-21	42.48	2	143	481	0	84	167
TRINITY_DN2780_c0_g1	1	690	70	36.52	95.71	sp|Q09827|SC61G_SCHPO Probable protein transport protein Sec61 subunit gamma OS=Schizosaccharomyces pombe (strain 972 / ATCC 24843) GN=sss1 PE=3 SV=1	136	56.9954	1.00963e-09	44.05	1	64	315	0	1	67
TRINITY_DN4660_c0_g1	1	683	487	52.27	24.64	sp|Q5ATG7|APDF_EMENI Aspyridones efflux protein apdF OS=Emericella nidulans (strain FGSC A4 / ATCC 38163 / CBS 112.46 / NRRL 194 / M139) GN=apdF PE=2 SV=1	156	64.6994	8.04965e-11	30	1	208	564	0	215	334
TRINITY_DN2422_c0_g2	1	670	535	36.72	15.51	sp|Q02252|MMSA_HUMAN Methylmalonate-semialdehyde dehydrogenase [acylating], mitochondrial OS=Homo sapiens GN=ALDH6A1 PE=1 SV=2	261	105.145	5.0779e-37	60.24	-1	2	247	0	107	189
TRINITY_DN8579_c1_g2	1	662	516	63.44	27.13	sp|P13860|GUX1_PHACH Exoglucanase 1 OS=Phanerochaete chrysosporium GN=CBH1 PE=2 SV=1	501	197.593	3.57819e-58	65.71	-3	121	540	0	298	437
TRINITY_DN8078_c0_g1	1	652	349	37.27	22.92	sp|Q9C0Y6|YKM8_SCHPO Zinc-type alcohol dehydrogenase-like protein PB24D3.08c OS=Schizosaccharomyces pombe (strain 972 / ATCC 24843) GN=SPAPB24D3.08c PE=3 SV=1	144	60.077	1.6103e-14	35.8	3	357	599	0	270	349
TRINITY_DN8184_c1_g3	1	636	205	33.49	34.63	sp|O13830|PTH2_SCHPO Probable peptidyl-tRNA hydrolase 2 OS=Schizosaccharomyces pombe (strain 972 / ATCC 24843) GN=SPAC19A8.14 PE=1 SV=1	203	82.8037	6.31463e-18	57.75	-3	242	454	0	135	205
TRINITY_DN7656_c1_g2	1	612	467	34.31	14.56	sp|Q3U155|CC174_MOUSE Coiled-coil domain-containing protein 174 OS=Mus musculus GN=Ccdc174 PE=2 SV=1	118	50.0618	2.55749e-07	44.29	-3	95	304	0	50	117
TRINITY_DN3747_c0_g1	1	604	127	58.61	92.13	sp|Q00680|POX18_CANMA Oleate-induced peroxisomal protein POX18 OS=Candida maltosa GN=POX18 PE=2 SV=2	225	91.2781	9.1202e-22	43.33	-2	154	507	0	3	119
TRINITY_DN6259_c0_g2	1	597	739	61.81	16.64	sp|A6YRN9|TREPH_PLEPU Trehalose phosphorylase OS=Pleurotus pulmonarius GN=TP PE=2 SV=1	648	254.218	2.12229e-78	98.37	-2	228	596	0	590	712
TRINITY_DN5234_c0_g1	1	583	320	33.45	20.31	sp|Q9UT34|YIQ9_SCHPO Uncharacterized protein C824.09c OS=Schizosaccharomyces pombe (strain 972 / ATCC 24843) GN=SPAC824.09c PE=4 SV=1	268	107.842	8.19952e-34	64.62	-3	186	380	0	45	109
TRINITY_DN6255_c0_g3	1	542	507	52.03	18.54	sp|Q9SBA7|STP8_ARATH Sugar transport protein 8 OS=Arabidopsis thaliana GN=STP8 PE=2 SV=2	171	70.4774	4.56557e-13	38.95	-2	194	475	0	261	354
TRINITY_DN3811_c0_g2	1	510	537	94.12	29.98	sp|Q07536|MMSA_BOVIN Methylmalonate-semialdehyde dehydrogenase [acylating], mitochondrial OS=Bos taurus GN=ALDH6A1 PE=1 SV=1	456	180.259	2.55304e-52	61.49	-3	29	508	0	334	494
TRINITY_DN2831_c0_g1	1	507	490	30.77	11.43	sp|O60016|CLR4_SCHPO Histone-lysine N-methyltransferase, H3 lysine-9 specific OS=Schizosaccharomyces pombe (strain 972 / ATCC 24843) GN=clr4 PE=1 SV=2	109	46.595	4.18174e-10	41.07	-1	46	201	0	433	488
TRINITY_DN8325_c0_g4	1	504	390	32.74	14.1	sp|Q2MHE4|HT1_ARATH Serine/threonine-protein kinase HT1 OS=Arabidopsis thaliana GN=HT1 PE=1 SV=1	131	55.0694	4.21157e-10	43.64	2	170	334	0	195	249
TRINITY_DN6851_c0_g5	1	473	171	86.26	69.59	sp|P0CG83|UBIQP_HORVU Polyubiquitin (Fragment) OS=Hordeum vulgare PE=2 SV=1	572	224.942	1.1039e-73	86.03	-3	1	408	0	18	136
TRINITY_DN6441_c0_g1	1	467	980	52.68	8.37	sp|O75005|SYV_SCHPO Valine--tRNA ligase OS=Schizosaccharomyces pombe (strain 972 / ATCC 24843) GN=vas2 PE=3 SV=1	298	119.398	2.01121e-41	64.63	1	43	288	0	163	244
TRINITY_DN183_c0_g1	1	464	309	99.57	50.81	sp|A2TBU1|EASG_EPIFI Agroclavine dehydrogenase OS=Epichloe festucae var. lolii GN=easG PE=2 SV=1	304	121.709	4.15257e-32	41.4	-1	3	464	0	119	275
TRINITY_DN7876_c0_g1	1	458	413	98.91	36.56	sp|P54778|PRS6B_SOLTU 26S proteasome regulatory subunit 6B homolog OS=Solanum tuberosum PE=2 SV=1	644	252.677	1.93523e-81	78.81	-1	6	458	0	256	406
TRINITY_DN9285_c6_g1	1	455	232	29.67	19.4	sp|Q2USD9|ROT1_ASPOR Protein rot1 OS=Aspergillus oryzae (strain ATCC 42149 / RIB 40) GN=rot1 PE=3 SV=2	133	55.8398	7.78586e-09	53.33	2	320	454	0	22	66
TRINITY_DN1832_c0_g3	1	449	604	26.73	6.62	sp|P78706|RCO1_NEUCR Transcriptional repressor rco-1 OS=Neurospora crassa (strain ATCC 24698 / 74-OR23-1A / CBS 708.71 / DSM 1257 / FGSC 987) GN=rco-1 PE=4 SV=2	119	50.447	1.22322e-06	55	1	328	447	0	257	296
TRINITY_DN909_c0_g2	1	429	2999	85.31	3.47	sp|Q8BV79|TRNK1_MOUSE TPR and ankyrin repeat-containing protein 1 OS=Mus musculus GN=Trank1 PE=2 SV=3	175	72.0182	1.4087e-13	34.43	-2	63	428	0	1564	1667
TRINITY_DN5459_c0_g1	1	423	241	55.32	32.78	sp|Q1RKB7|FABG_RICBR 3-oxoacyl-[acyl-carrier-protein] reductase FabG OS=Rickettsia bellii (strain RML369-C) GN=fabG PE=3 SV=1	151	62.7734	1.82746e-11	42.68	-2	189	422	0	131	209
TRINITY_DN2837_c0_g1	1	390	517	92.31	24.37	sp|P17549|CP53_ASPNG Benzoate 4-monooxygenase OS=Aspergillus niger GN=bphA PE=1 SV=1	245	98.9821	1.71378e-23	44.09	2	2	361	0	79	204
TRINITY_DN7121_c0_g2	1	383	773	90.86	15.01	sp|Q4PE39|SEC23_USTMA Protein transport protein SEC23 OS=Ustilago maydis (strain 521 / FGSC 9021) GN=SEC23 PE=3 SV=1	613	240.736	3.74586e-74	92.24	1	34	381	0	1	116
TRINITY_DN8850_c0_g1	1	336	432	59.82	15.51	sp|O60158|BQT4_SCHPO Bouquet formation protein 4 OS=Schizosaccharomyces pombe (strain 972 / ATCC 24843) GN=bqt4 PE=1 SV=2	111	47.3654	7.29713e-06	32.84	1	136	336	0	29	95
TRINITY_DN7918_c0_g3	1	304	814	77.96	9.71	sp|P07799|TOP1_SCHPO DNA topoisomerase 1 OS=Schizosaccharomyces pombe (strain 972 / ATCC 24843) GN=top1 PE=1 SV=2	270	108.612	6.30842e-27	67.5	-1	68	304	0	352	430
TRINITY_DN7670_c0_g2	1	303	209	43.56	21.05	sp|Q9P7N9|TRS31_SCHPO Transport protein particle subunit trs31 OS=Schizosaccharomyces pombe (strain 972 / ATCC 24843) GN=trs31 PE=3 SV=1	126	53.1434	1.77573e-08	50	-3	2	133	0	27	70
TRINITY_DN9002_c0_g3	1	299	605	52.17	8.6	sp|Q96NN9|AIFM3_HUMAN Apoptosis-inducing factor 3 OS=Homo sapiens GN=AIFM3 PE=1 SV=1	117	49.6766	9.82592e-07	44.23	-2	11	166	0	71	122
TRINITY_DN2139_c0_g3	1	290	237	69.31	28.27	sp|Q49P94|GAAP_VACCL Golgi anti-apoptotic protein OS=Vaccinia virus (strain Lister) GN=L6 PE=1 SV=1	142	59.3066	1.05151e-10	46.27	2	89	289	0	75	141
TRINITY_DN8802_c0_g4	1	277	282	96.39	31.91	sp|P50166|ARDH_CANTR D-arabinitol 2-dehydrogenase [ribulose-forming] OS=Candida tropicalis GN=ARD PE=1 SV=1	205	83.5741	2.77305e-19	45.56	3	9	275	0	180	269
TRINITY_DN989_c0_g1	1	261	471	65.52	12.31	sp|P50102|UBP8_YEAST Ubiquitin carboxyl-terminal hydrolase 8 OS=Saccharomyces cerevisiae (strain ATCC 204508 / S288c) GN=UBP8 PE=1 SV=1	128	53.9138	2.90451e-08	36.21	3	18	188	0	46	103
TRINITY_DN8401_c0_g4	1	252	490	97.62	16.73	sp|P0CM04|ARP6_CRYNJ Actin-like protein ARP6 OS=Cryptococcus neoformans var. neoformans serotype D (strain JEC21 / ATCC MYA-565) GN=ARP6 PE=3 SV=1	290	116.316	1.24745e-30	57.32	-1	4	249	0	93	174
TRINITY_DN2945_c0_g1	1	246	305	65.85	17.7	sp|Q00668|STCC_EMENI Putative sterigmatocystin biosynthesis peroxidase stcC OS=Emericella nidulans (strain FGSC A4 / ATCC 38163 / CBS 112.46 / NRRL 194 / M139) GN=stcC PE=3 SV=2	131	55.0694	5.38512e-09	40.74	-3	26	187	0	34	87
TRINITY_DN6424_c0_g3	1	237	1554	100	5.15	sp|Q875Q8|MYO2_LACK1 Myosin-2 OS=Lachancea kluyveri (strain ATCC 58438 / CBS 3082 / CCRC 21498 / NBRC 1685 / JCM 7257 / NCYC 543 / NRRL Y-12651) GN=MYO2 PE=3 SV=1	287	115.161	2.80365e-29	67.5	-1	1	237	0	87	166
TRINITY_DN7659_c0_g2	1	201	1337	86.57	4.34	sp|A0A0D1CZ63|FER6_USTMA Multidrug resistance protein fer6 OS=Ustilago maydis (strain 521 / FGSC 9021) GN=fer6 PE=2 SV=1	138	57.7658	1.14434e-09	37.93	-3	2	175	0	982	1039
TRINITY_DN9306_c0_g1	1	7875	462	14.13	81.39	sp|Q9HGT6|SYSC_CANAL Serine--tRNA ligase, cytoplasmic OS=Candida albicans (strain SC5314 / ATCC MYA-2876) GN=SES1 PE=1 SV=1	1159	451.055	2.43127e-139	61.97	2	6761	7873	0	2	377
TRINITY_DN3293_c0_g1	1	6649	2211	82.52	83.94	sp|J4UHQ6|OPS1_BEAB2 Orsellinic acid synthase OS=Beauveria bassiana (strain ARSEF 2860) GN=OpS1 PE=1 SV=1	2745	1061.98	0	38.17	1	568	6054	0	6	1861
TRINITY_DN8472_c0_g1	1	6104	246	13.37	100	sp|Q9FSG7|TP1A_MALDO Thaumatin-like protein 1a OS=Malus domestica GN=TL1 PE=1 SV=1	334	133.265	3.61978e-32	35.71	-1	3216	4031	0	1	246
TRINITY_DN8575_c3_g1	1	5684	517	24.38	81.62	sp|Q12608|STCB_EMENI Probable sterigmatocystin biosynthesis P450 monooxygenase STCB OS=Emericella nidulans (strain FGSC A4 / ATCC 38163 / CBS 112.46 / NRRL 194 / M139) GN=stcB PE=3 SV=2	379	150.599	3.17552e-36	28.39	2	2873	4258	0	48	469
TRINITY_DN7553_c1_g1	1	5468	1670	11.19	11.8	sp|A1ZAJ2|KIF1A_DROME Kinesin-like protein unc-104 OS=Drosophila melanogaster GN=unc-104 PE=1 SV=1	679	266.159	1.4564e-134	67.65	-3	4849	5460	0	116	312
TRINITY_DN8879_c0_g1	1	5245	821	49.36	98.78	sp|Q5BDP1|RSP5_EMENI E3 ubiquitin-protein ligase RSP5 OS=Emericella nidulans (strain FGSC A4 / ATCC 38163 / CBS 112.46 / NRRL 194 / M139) GN=hulA PE=1 SV=1	2598	1005.36	0	61.71	-1	2474	5062	0	11	821
TRINITY_DN9143_c0_g1	1	5066	785	40.15	81.78	sp|Q4WQ08|ADMB_ASPFU Disintegrin and metalloproteinase domain-containing protein B OS=Neosartorya fumigata (strain ATCC MYA-4609 / Af293 / CBS 101355 / FGSC A1100) GN=ADM-B PE=3 SV=2	1055	410.994	9.7677e-123	37.28	2	536	2569	0	66	707
TRINITY_DN8982_c0_g2	1	4865	543	21.64	67.4	sp|O13820|ERG5_SCHPO Cytochrome P450 61 OS=Schizosaccharomyces pombe (strain 972 / ATCC 24843) GN=erg5 PE=1 SV=3	824	322.013	4.3371e-117	44.29	-1	1836	2888	0	26	391
TRINITY_DN8960_c0_g1	1	4681	348	20.44	92.53	sp|P81054|PLMP_GRIFR Peptidyl-Lys metalloendopeptidase OS=Grifola frondosa GN=MEP PE=1 SV=2	892	348.206	1.95622e-106	57.76	1	2269	3225	0	25	346
TRINITY_DN7105_c0_g1	1	4510	1064	70.91	99.72	sp|O13651|SYIC_SCHPO Isoleucine--tRNA ligase, cytoplasmic OS=Schizosaccharomyces pombe (strain 972 / ATCC 24843) GN=irs1 PE=3 SV=1	3437	1328.54	0	61.54	-3	45	3242	0	3	1063
TRINITY_DN8988_c0_g1	1	4417	953	9.37	13.85	sp|P25618|CWH43_YEAST Protein CWH43 OS=Saccharomyces cerevisiae (strain ATCC 204508 / S288c) GN=CWH43 PE=1 SV=2	416	164.851	8.34444e-40	58.7	1	3955	4368	0	2	133
TRINITY_DN7476_c1_g1	1	4317	483	31.62	93.37	sp|C7GPC1|BLH1_YEAS2 Cysteine proteinase 1, mitochondrial OS=Saccharomyces cerevisiae (strain JAY291) GN=LAP3 PE=3 SV=2	929	362.459	6.98713e-110	41.65	2	266	1630	0	32	482
TRINITY_DN4309_c0_g1	1	4227	515	20.01	50.68	sp|Q11120|OFD1_SCHPO Prolyl 3,4-dihydroxylase ofd1 OS=Schizosaccharomyces pombe (strain 972 / ATCC 24843) GN=ofd1 PE=1 SV=1	574	225.713	2.72479e-74	44.68	1	439	1284	0	13	273
TRINITY_DN7742_c0_g1	1	4076	370	25.39	93.24	sp|P50867|CYSK_EMENI Cysteine synthase 1 OS=Emericella nidulans (strain FGSC A4 / ATCC 38163 / CBS 112.46 / NRRL 194 / M139) GN=cysB PE=3 SV=2	1240	482.256	3.2346e-156	70.43	1	79	1113	0	25	369
TRINITY_DN8001_c0_g1	1	3990	926	34.66	45.9	sp|P87000|ACU15_NEUCR Transcriptional activator protein acu-15 OS=Neurospora crassa (strain ATCC 24698 / 74-OR23-1A / CBS 708.71 / DSM 1257 / FGSC 987) GN=acu-15 PE=1 SV=2	162	67.0106	1.90538e-13	23.49	-2	1746	3128	0	41	465
TRINITY_DN8230_c0_g2	1	3905	935	42.25	53.37	sp|O94623|REV1_SCHPO DNA repair protein rev1 OS=Schizosaccharomyces pombe (strain 972 / ATCC 24843) GN=rev1 PE=3 SV=3	726	284.263	1.43777e-86	31.38	-1	1998	3647	0	19	517
TRINITY_DN6185_c0_g1	1	3776	913	29.48	39.65	sp|Q9QYM7|XPF_CRIGR DNA repair endonuclease XPF OS=Cricetulus griseus GN=ERCC4 PE=2 SV=3	778	304.294	1.45036e-85	42.3	1	2506	3618	0	538	899
TRINITY_DN8579_c1_g1	1	3700	506	36.32	87.75	sp|Q92400|GUX2_AGABI Exoglucanase OS=Agaricus bisporus GN=cel2 PE=2 SV=1	1296	503.827	1.68705e-163	58.93	1	1048	2391	0	1	444
TRINITY_DN8865_c1_g1	1	3626	391	12.33	32.48	sp|Q99638|RAD9A_HUMAN Cell cycle checkpoint control protein RAD9A OS=Homo sapiens GN=RAD9A PE=1 SV=1	192	78.5666	8.33128e-14	35.33	-2	3134	3580	0	1	127
TRINITY_DN8970_c1_g4	1	3560	470	21.32	52.77	sp|P0CT89|OMT1_PHACR 4-O-methyltransferase 1 OS=Phanerochaete chrysosporium (strain RP-78 / ATCC MYA-4764 / FGSC 9002) GN=fgenesh1_kg.2_#_1379_#_Locus12621v1rpkm4.09 PE=1 SV=1	428	169.474	4.84131e-43	36.61	-2	1838	2596	0	207	454
TRINITY_DN4724_c0_g1	1	3462	288	12.56	41.32	sp|Q4R544|ASB8_MACFA Ankyrin repeat and SOCS box protein 8 OS=Macaca fascicularis GN=ASB8 PE=2 SV=1	139	58.151	1.44228e-07	33.1	3	546	980	0	57	175
TRINITY_DN5646_c0_g2	1	3334	472	19.71	47.46	sp|Q28FE8|ADAT1_XENTR tRNA-specific adenosine deaminase 1 OS=Xenopus tropicalis GN=adat1 PE=2 SV=1	274	110.153	8.60703e-24	32.19	3	1329	1985	0	249	472
TRINITY_DN8999_c0_g1	1	3291	736	70.1	99.86	sp|Q9C168|CAT1_NEUCR Catalase-1 OS=Neurospora crassa (strain ATCC 24698 / 74-OR23-1A / CBS 708.71 / DSM 1257 / FGSC 987) GN=cat-1 PE=1 SV=2	2280	882.863	0	58.18	-1	973	3279	0	2	736
TRINITY_DN7735_c0_g1	1	3127	267	25.42	83.9	sp|Q05016|YM71_YEAST NADP-dependent 3-hydroxy acid dehydrogenase OS=Saccharomyces cerevisiae (strain ATCC 204508 / S288c) GN=YMR226C PE=1 SV=1	452	178.718	2.42847e-48	38.49	-3	309	1103	0	43	266
TRINITY_DN8393_c0_g1	1	3093	2244	28.71	13.41	sp|Q09794|PYR1_SCHPO Protein ura1 OS=Schizosaccharomyces pombe (strain 972 / ATCC 24843) GN=ura1 PE=1 SV=1	632	248.054	2.13562e-118	44.26	-1	2185	3072	0	1768	2068
TRINITY_DN8457_c0_g1	1	2979	408	19.23	46.81	sp|Q9HEZ1|XYNA_PHACH Endo-1,4-beta-xylanase A OS=Phanerochaete chrysosporium GN=xynA PE=1 SV=1	638	250.366	4.1214e-106	62.3	-1	268	840	0	216	406
TRINITY_DN9276_c0_g3	1	2917	735	24.58	31.29	sp|O42945|DHX15_SCHPO Probable pre-mRNA-splicing factor ATP-dependent RNA helicase prp43 OS=Schizosaccharomyces pombe (strain 972 / ATCC 24843) GN=prp43 PE=3 SV=1	689	270.011	5.8875e-137	61.67	-1	2201	2917	0	227	456
TRINITY_DN6915_c0_g1	1	2881	599	60.81	89.32	sp|Q6UPE0|CHDH_RAT Choline dehydrogenase, mitochondrial OS=Rattus norvegicus GN=Chdh PE=1 SV=1	595	233.802	1.49639e-64	30.27	-2	427	2178	0	44	578
TRINITY_DN8741_c0_g1	1	2818	4076	67.49	18.11	sp|Q9P4Z1|TOM1_NEUCR E3 ubiquitin-protein ligase TOM1-like OS=Neurospora crassa (strain ATCC 24698 / 74-OR23-1A / CBS 708.71 / DSM 1257 / FGSC 987) GN=B11B22.010 PE=3 SV=4	376	149.443	5.07056e-35	25.43	-3	9	1910	0	1597	2334
TRINITY_DN8398_c0_g1	1	2760	636	31.41	45.13	sp|O14019|HAL4_SCHPO Serine/threonine-protein kinase hal4 OS=Schizosaccharomyces pombe (strain 972 / ATCC 24843) GN=hal4 PE=1 SV=1	711	278.485	4.91993e-80	45.24	-1	775	1641	0	343	629
TRINITY_DN6690_c0_g1	1	2685	356	24.36	61.8	sp|A1D3T4|GANA_NEOFI Probable arabinogalactan endo-beta-1,4-galactanase A OS=Neosartorya fischeri (strain ATCC 1020 / DSM 3700 / CBS 544.65 / FGSC A1164 / JCM 1740 / NRRL 181 / WB 181) GN=galA PE=3 SV=1	429	169.859	4.6246e-70	41.07	3	1923	2576	0	134	353
TRINITY_DN8374_c1_g1	1	2619	256	33.91	94.92	sp|Q48436|BUDC_KLEPN Diacetyl reductase [(S)-acetoin forming] OS=Klebsiella pneumoniae GN=budC PE=1 SV=2	234	94.7449	1.03836e-19	32.33	3	231	1118	0	3	245
TRINITY_DN6416_c0_g1	1	2595	684	36.99	45.32	sp|Q9UTN3|CID14_SCHPO Poly(A) RNA polymerase cid14 OS=Schizosaccharomyces pombe (strain 972 / ATCC 24843) GN=cid14 PE=1 SV=2	711	278.485	6.39236e-80	44.69	-2	696	1655	0	221	530
TRINITY_DN7292_c0_g3	1	2571	322	15.87	36.65	sp|O42700|TAL1_SCHPO Transaldolase OS=Schizosaccharomyces pombe (strain 972 / ATCC 24843) GN=tal1 PE=1 SV=2	440	174.096	8.10096e-64	63.97	-3	2162	2569	0	112	229
TRINITY_DN7167_c0_g1	1	2548	354	29.67	70.34	sp|P87034|GPA3_USTMA Guanine nucleotide-binding protein alpha-3 subunit OS=Ustilago maydis (strain 521 / FGSC 9021) GN=GPA3 PE=1 SV=1	1034	402.905	2.01635e-147	74.6	-2	1264	2019	0	106	354
TRINITY_DN8404_c0_g1	1	2523	184	4.28	19.57	sp|Q12133|SPC3_YEAST Signal peptidase complex subunit SPC3 OS=Saccharomyces cerevisiae (strain ATCC 204508 / S288c) GN=SPC3 PE=1 SV=1	138	57.7658	3.98456e-08	61.11	-1	589	696	0	74	109
TRINITY_DN8735_c0_g1	1	2461	380	26.94	59.21	sp|A2TBU0|EASA_EPIFI Probable inactive reductase easA OS=Epichloe festucae var. lolii GN=easA PE=2 SV=1	462	182.57	1.91216e-75	41.48	3	609	1271	0	143	367
TRINITY_DN7751_c0_g1	1	2439	375	26.32	54.67	sp|A3R044|SSU1_ARTBC Sulfite efflux pump SSU1 OS=Arthroderma benhamiae (strain ATCC MYA-4681 / CBS 112371) GN=SSU1 PE=2 SV=1	318	127.102	6.21375e-43	32.24	2	755	1396	0	156	360
TRINITY_DN2487_c0_g3	1	2422	741	48.18	50.74	sp|Q0WVK7|PPR12_ARATH Pentatricopeptide repeat-containing protein At1g05670, mitochondrial OS=Arabidopsis thaliana GN=At1g05670 PE=2 SV=1	284	114.005	1.12523e-24	22.67	1	1252	2418	0	322	697
TRINITY_DN8633_c0_g2	1	2382	523	71.41	91.2	sp|P87175|APN2_SCHPO DNA-(apurinic or apyrimidinic site) lyase 2 OS=Schizosaccharomyces pombe (strain 972 / ATCC 24843) GN=apn2 PE=1 SV=1	607	238.424	2.11264e-67	30.59	-3	383	2083	0	42	518
TRINITY_DN459_c0_g1	1	2357	378	18.33	38.1	sp|B2AMJ3|TVP38_PODAN Golgi apparatus membrane protein TVP38 OS=Podospora anserina (strain S / ATCC MYA-4624 / DSM 980 / FGSC 10383) GN=TVP38 PE=3 SV=1	472	186.422	1.17472e-50	64.58	2	668	1099	0	97	240
TRINITY_DN7833_c0_g3	1	2331	98	11.71	93.88	sp|P0CM70|COX23_CRYNJ Cytochrome c oxidase-assembly factor COX23, mitochondrial OS=Cryptococcus neoformans var. neoformans serotype D (strain JEC21 / ATCC MYA-565) GN=COX23 PE=3 SV=1	220	89.3521	2.18125e-19	45.65	-3	1991	2263	0	7	98
TRINITY_DN6446_c0_g1	1	2310	591	10.13	13.03	sp|C0SAI5|ECM14_PARBP Putative metallocarboxypeptidase ECM14 OS=Paracoccidioides brasiliensis (strain Pb03) GN=ECM14 PE=3 SV=1	203	82.8037	1.71408e-40	46.84	-1	1279	1512	0	267	343
TRINITY_DN8994_c1_g7	1	2293	1205	51.94	33.69	sp|Q9HFF5|PDS5_SCHPO Sister chromatid cohesion protein pds5 OS=Schizosaccharomyces pombe (strain 972 / ATCC 24843) GN=pds5 PE=1 SV=1	614	241.121	4.13251e-84	36.54	-3	1044	2234	0	3	408
TRINITY_DN9285_c3_g1	1	2254	251	15.84	47.81	sp|Q1DNE5|ROT1_COCIM Protein ROT1 OS=Coccidioides immitis (strain RS) GN=ROT1 PE=3 SV=1	213	86.6557	2.63372e-17	38.84	-1	1817	2173	0	80	199
TRINITY_DN6367_c0_g1	1	2238	517	22.52	30.17	sp|P17549|CP53_ASPNG Benzoate 4-monooxygenase OS=Aspergillus niger GN=bphA PE=1 SV=1	413	163.696	2.66207e-59	49.4	1	319	822	0	32	187
TRINITY_DN9014_c1_g1	1	2197	517	45.61	66.34	sp|P17549|CP53_ASPNG Benzoate 4-monooxygenase OS=Aspergillus niger GN=bphA PE=1 SV=1	618	242.662	1.04768e-73	40.63	-2	292	1293	0	34	376
TRINITY_DN6743_c0_g1	1	2175	1833	32.41	12.22	sp|F1QFR9|PSM4A_DANRE Proteasome activator complex subunit 4A OS=Danio rerio GN=psme4a PE=3 SV=2	199	81.2629	2.64925e-14	26.75	3	1470	2174	0	263	486
TRINITY_DN5917_c0_g1	1	2145	899	19.02	14.79	sp|Q09778|TSC1_SCHPO Tuberous sclerosis 1 protein homolog OS=Schizosaccharomyces pombe (strain 972 / ATCC 24843) GN=tsc1 PE=1 SV=1	176	72.4034	1.01906e-11	29.79	-1	556	963	0	569	701
TRINITY_DN6825_c0_g1	1	2057	694	42.29	40.63	sp|Q5K8R6|CXT1_CRYNJ Beta-1,2-xylosyltransferase 1 OS=Cryptococcus neoformans var. neoformans serotype D (strain JEC21 / ATCC MYA-565) GN=CXT1 PE=1 SV=1	228	92.4337	8.14953e-26	28.67	-1	306	1175	0	196	477
TRINITY_DN7488_c0_g1	1	2040	633	30.74	32.23	sp|Q6WIH8|MEP3_TRIRU Extracellular metalloproteinase 3 OS=Trichophyton rubrum GN=MEP3 PE=1 SV=1	484	191.045	2.82885e-59	57.28	-1	1	627	0	296	499
TRINITY_DN6387_c0_g1	1	1981	367	16.05	28.61	sp|Q2US83|EGLD_ASPOR Probable endo-beta-1,4-glucanase D OS=Aspergillus oryzae (strain ATCC 42149 / RIB 40) GN=eglD PE=3 SV=1	160	66.2402	3.53583e-10	34.23	-2	34	351	0	27	131
TRINITY_DN7702_c0_g1	1	1950	136	12.31	58.82	sp|P16933|SC3_SCHCO Fruiting body protein SC3 OS=Schizophyllum commune GN=SC3 PE=1 SV=2	179	73.559	1.02385e-13	58.75	-1	172	411	0	56	135
TRINITY_DN5371_c0_g2	1	1919	540	5	5.93	sp|O59843|CBHB_ASPAC 1,4-beta-D-glucan cellobiohydrolase B OS=Aspergillus aculeatus GN=cbhB PE=2 SV=1	137	57.3806	2.65832e-07	78.12	3	1728	1823	0	509	540
TRINITY_DN3859_c0_g1	1	1878	1888	92.65	30.93	sp|Q765N2|FAS2_LACKL Fatty acid synthase subunit alpha OS=Lachancea kluyveri GN=FAS2 PE=3 SV=1	1423	552.747	1.32052e-175	48.73	-2	138	1877	0	1305	1888
TRINITY_DN6251_c0_g3	1	1864	463	51.34	61.77	sp|O00093|PHYB_EMENI 3-phytase B OS=Emericella nidulans (strain FGSC A4 / ATCC 38163 / CBS 112.46 / NRRL 194 / M139) GN=phyB PE=3 SV=2	262	105.531	7.36188e-35	27.76	1	604	1560	0	163	448
TRINITY_DN5390_c0_g1	1	1849	495	27.91	34.34	sp|Q5QHG6|LAP2_TRIRU Leucine aminopeptidase 2 OS=Trichophyton rubrum GN=LAP2 PE=1 SV=1	451	178.333	8.68252e-58	51.74	-3	18	533	0	181	350
TRINITY_DN8800_c0_g3	1	1836	504	39.38	42.26	sp|Q91YW3|DNJC3_MOUSE DnaJ homolog subfamily C member 3 OS=Mus musculus GN=Dnajc3 PE=1 SV=1	254	102.449	1.28235e-21	30.24	-3	254	976	0	246	458
TRINITY_DN6812_c0_g1	1	1821	400	25.21	29	sp|L8FSM5|SUB2_PSED2 Subtilisin-like protease 2 OS=Pseudogymnoascus destructans (strain ATCC MYA-4855 / 20631-21) GN=SP2 PE=1 SV=1	239	96.6709	6.90136e-52	43.14	-3	815	1273	0	231	346
TRINITY_DN5243_c0_g2	1	1811	262	9.94	22.9	sp|Q5AFP3|MCM1_CANAL Transcription factor of morphogenesis MCM1 OS=Candida albicans (strain SC5314 / ATCC MYA-2876) GN=MCM1 PE=1 SV=1	197	80.4925	1.8822e-15	88.33	-3	1630	1809	0	84	143
TRINITY_DN7397_c0_g2	1	1799	673	19.34	16.79	sp|O13650|SFC9_SCHPO Putative transcription factor tau subunit sfc9 OS=Schizosaccharomyces pombe (strain 972 / ATCC 24843) GN=sfc9 PE=4 SV=2	131	55.0694	1.72945e-06	26.27	2	1271	1618	0	559	671
TRINITY_DN5745_c0_g1	1	1785	235	36.97	82.55	sp|Q9P7G5|BOS1_SCHPO Protein transport protein bos1 OS=Schizosaccharomyces pombe (strain 972 / ATCC 24843) GN=bos1 PE=3 SV=1	372	147.902	4.32902e-39	37.73	-3	731	1390	0	41	234
TRINITY_DN7724_c0_g1	1	1739	1519	45.54	16.72	sp|Q0CW42|DCL1_ASPTN Dicer-like protein 1 OS=Aspergillus terreus (strain NIH 2624 / FGSC A1156) GN=dcl1 PE=3 SV=2	212	86.2705	4.28808e-16	30.43	-1	912	1703	0	461	714
TRINITY_DN9207_c0_g1	1	1683	2052	96.08	26.71	sp|A1A5F2|HTR5B_XENTR HEAT repeat-containing protein 5B OS=Xenopus tropicalis GN=heatr5b PE=2 SV=1	354	140.969	1.33046e-33	25.69	-2	3	1619	0	751	1298
TRINITY_DN7861_c0_g1	1	1660	972	39.76	22.84	sp|Q14CX7|NAA25_HUMAN N-alpha-acetyltransferase 25, NatB auxiliary subunit OS=Homo sapiens GN=NAA25 PE=1 SV=1	243	98.2117	5.37668e-20	28.95	-3	48	707	0	446	667
TRINITY_DN7073_c0_g1	1	1648	109	6.19	32.11	sp|O13896|RPC10_SCHPO DNA-directed RNA polymerase III subunit RPC10 OS=Schizosaccharomyces pombe (strain 972 / ATCC 24843) GN=rpc11 PE=3 SV=1	101	43.5134	4.77618e-06	54.29	-2	1519	1620	0	1	35
TRINITY_DN6216_c0_g1	1	1635	783	50.09	34.1	sp|O13956|TSR1_SCHPO Ribosome biogenesis protein tsr1 OS=Schizosaccharomyces pombe (strain 972 / ATCC 24843) GN=tsr1 PE=3 SV=1	393	155.992	2.56666e-56	35	3	630	1448	0	127	393
TRINITY_DN6287_c0_g1	1	1616	458	69.06	69.21	sp|P56288|EI2BG_SCHPO Probable translation initiation factor eIF-2B subunit gamma OS=Schizosaccharomyces pombe (strain 972 / ATCC 24843) GN=tif223 PE=1 SV=2	321	128.257	9.791e-31	27.25	2	500	1615	0	123	439
TRINITY_DN9135_c0_g3	1	1596	210	31.2	77.62	sp|O13770|YE98_SCHPO Uncharacterized membrane protein C17A5.08 OS=Schizosaccharomyces pombe (strain 972 / ATCC 24843) GN=SPAC17A5.08 PE=3 SV=1	302	120.939	5.03612e-34	36.14	-1	1096	1593	0	19	181
TRINITY_DN3889_c0_g1	1	1586	301	28.56	49.17	sp|O94553|RPC6_SCHPO Probable DNA-directed RNA polymerase III subunit rpc6 OS=Schizosaccharomyces pombe (strain 972 / ATCC 24843) GN=rpc6 PE=2 SV=1	356	141.739	2.08005e-36	45.7	1	337	789	0	101	248
TRINITY_DN6402_c0_g1	1	1521	381	31.76	36.22	sp|Q9UT84|YIP6_SCHPO Phospholipid scramblase family protein C343.06c OS=Schizosaccharomyces pombe (strain 972 / ATCC 24843) GN=SPAC343.06c PE=3 SV=1	241	97.4413	6.63935e-27	35.8	3	393	875	0	102	239
TRINITY_DN7256_c1_g2	1	1480	832	31.01	18.99	sp|Q5A688|PMT6_CANAL Dolichyl-phosphate-mannose--protein mannosyltransferase 6 OS=Candida albicans (strain SC5314 / ATCC MYA-2876) GN=PMT6 PE=2 SV=1	358	142.51	1.06886e-34	42.86	2	1019	1477	0	37	194
TRINITY_DN3868_c0_g1	1	1461	836	33.06	19.38	sp|Q9Y7J8|YGL1_SCHPO Uncharacterized protein C216.01c OS=Schizosaccharomyces pombe (strain 972 / ATCC 24843) GN=SPBC216.01c PE=2 SV=3	378	150.214	3.12858e-37	44.44	-3	737	1219	0	198	359
TRINITY_DN6403_c0_g4	1	1439	493	66.92	53.55	sp|Q54PI4|T1841_DICDI Transmembrane protein 184 homolog DDB_G0284525 OS=Dictyostelium discoideum GN=tmem184A PE=3 SV=1	329	131.339	6.65872e-32	32.4	-3	454	1416	0	53	316
TRINITY_DN3132_c0_g1	1	1408	353	75.43	100	sp|P30675|GPA1_COPCO Guanine nucleotide-binding protein subunit alpha OS=Coprinellus congregatus GN=CGP1 PE=2 SV=3	1725	669.078	0	88.98	-3	306	1367	0	1	353
TRINITY_DN4088_c0_g1	1	1367	124	29.41	92.74	sp|Q9WY55|GCSH_THEMA Glycine cleavage system H protein OS=Thermotoga maritima (strain ATCC 43589 / MSB8 / DSM 3109 / JCM 10099) GN=gcvH PE=1 SV=1	316	126.331	4.1155e-33	48.51	-3	706	1107	0	4	118
TRINITY_DN10303_c0_g1	1	1348	707	52.74	33.38	sp|O74225|HSP88_NEUCR Heat shock protein hsp88 OS=Neurospora crassa (strain ATCC 24698 / 74-OR23-1A / CBS 708.71 / DSM 1257 / FGSC 987) GN=hsp88 PE=1 SV=1	398	157.918	1.33536e-40	45.19	-3	627	1337	0	411	646
TRINITY_DN8730_c0_g1	1	1340	216	40.52	84.72	sp|O74826|COQ7_SCHPO 5-demethoxyubiquinone hydroxylase, mitochondrial OS=Schizosaccharomyces pombe (strain 972 / ATCC 24843) GN=coq7 PE=3 SV=1	523	206.068	1.17947e-61	56.28	-2	449	991	0	34	216
TRINITY_DN8980_c0_g3	1	1324	315	84.29	98.73	sp|Q7S7R6|RT09_NEUCR 37S ribosomal protein S9, mitochondrial OS=Neurospora crassa (strain ATCC 24698 / 74-OR23-1A / CBS 708.71 / DSM 1257 / FGSC 987) GN=mrp-9 PE=3 SV=2	309	123.635	2.36814e-30	28.65	-2	199	1314	0	5	315
TRINITY_DN3560_c0_g2	1	1303	598	63.32	49.5	sp|Q3EDF8|PPR28_ARATH Pentatricopeptide repeat-containing protein At1g09900 OS=Arabidopsis thaliana GN=At1g09900 PE=2 SV=1	150	62.3882	3.88161e-09	22.22	-3	42	866	0	245	540
TRINITY_DN7003_c0_g1	1	1287	221	42.19	81.9	sp|P41805|RL10_YEAST 60S ribosomal protein L10 OS=Saccharomyces cerevisiae (strain ATCC 204508 / S288c) GN=RPL10 PE=1 SV=1	733	286.96	3.65615e-93	72.38	3	348	890	0	31	211
TRINITY_DN8667_c0_g4	1	1278	533	22.3	17.82	sp|Q12739|LAC2_PLEOS Laccase-2 OS=Pleurotus ostreatus GN=POX2 PE=1 SV=1	317	126.716	1.67949e-30	92.63	-1	1	285	0	1	95
TRINITY_DN5649_c0_g1	1	1260	740	84.29	43.92	sp|Q0DXS3|RDR1_ORYSJ Probable RNA-dependent RNA polymerase 1 OS=Oryza sativa subsp. japonica GN=RDR1 PE=2 SV=2	353	140.584	1.28587e-34	31.01	-2	108	1169	0	328	652
TRINITY_DN7896_c3_g14	1	1252	487	25.88	23	sp|Q9SXY1|FAS2_ARATH Chromatin assembly factor 1 subunit FAS2 OS=Arabidopsis thaliana GN=FAS2 PE=1 SV=1	226	91.6633	1.07123e-18	42.86	-2	670	993	0	261	372
TRINITY_DN7597_c0_g7	1	1240	182	48.63	80.77	sp|Q4KMJ1|CHAC2_DANRE Putative glutathione-specific gamma-glutamylcyclotransferase 2 OS=Danio rerio GN=chac2 PE=2 SV=1	251	101.293	8.93206e-24	34.63	-2	358	960	0	23	169
TRINITY_DN1552_c0_g1	1	1232	886	45.05	20.88	sp|Q6PFE3|RA54B_MOUSE DNA repair and recombination protein RAD54B OS=Mus musculus GN=Rad54b PE=2 SV=1	202	82.4185	1.58994e-15	33.33	-3	73	627	0	122	306
TRINITY_DN5291_c0_g1	1	1224	465	72.55	61.94	sp|P42818|KPK1_ARATH Serine/threonine-protein kinase AtPK1/AtPK6 OS=Arabidopsis thaliana GN=ATPK1 PE=1 SV=1	268	107.842	1.94506e-24	31.37	-3	215	1102	0	140	427
TRINITY_DN3751_c0_g1	1	1217	304	52.26	71.05	sp|Q9P7C9|DCPS_SCHPO m7GpppX diphosphatase OS=Schizosaccharomyces pombe (strain 972 / ATCC 24843) GN=nhm1 PE=1 SV=1	382	151.754	1.23999e-40	37.39	-1	183	818	0	78	293
TRINITY_DN6951_c0_g1	1	1204	425	73.26	69.41	sp|Q7TQ95|LNP_MOUSE Endoplasmic reticulum junction formation protein lunapark OS=Mus musculus GN=Lnpk PE=1 SV=1	179	73.559	6.25588e-13	25.3	2	176	1057	0	17	311
TRINITY_DN6830_c0_g1	1	1189	530	25.99	19.25	sp|Q09788|ASL1_SCHPO Alkali-sensitive linkage protein 1 OS=Schizosaccharomyces pombe (strain 972 / ATCC 24843) GN=asl1 PE=1 SV=1	163	67.3958	2.34617e-17	34.62	1	694	1002	0	428	529
TRINITY_DN8476_c0_g1	1	1169	1099	86.23	27.57	sp|O13433|PLC1_CANAX 1-phosphatidylinositol 4,5-bisphosphate phosphodiesterase 1 OS=Candida albicans GN=PLC1 PE=4 SV=1	369	146.747	1.57157e-36	31.03	1	46	1053	0	784	1086
TRINITY_DN6962_c0_g2	1	1159	565	75.84	50.8	sp|P40375|MAOX_SCHPO NAD-dependent malic enzyme OS=Schizosaccharomyces pombe (strain 972 / ATCC 24843) GN=mae2 PE=1 SV=1	534	210.305	2.54995e-60	41.02	3	3	881	0	279	565
TRINITY_DN6315_c0_g3	1	1141	774	90.97	37.6	sp|Q9C1W9|DNLI3_SCHPO DNA ligase 3 OS=Schizosaccharomyces pombe (strain 972 / ATCC 24843) GN=adl1 PE=3 SV=1	684	268.085	2.49587e-80	42.17	-1	104	1141	0	481	771
TRINITY_DN2551_c0_g1	1	1119	339	19.57	21.53	sp|Q9WV03|FA50A_MOUSE Protein FAM50A OS=Mus musculus GN=Fam50a PE=1 SV=1	336	134.035	1.84318e-55	80.82	3	897	1115	0	261	333
TRINITY_DN7329_c0_g3	1	1113	108	12.13	41.67	sp|O74174|VATG_SCHPO V-type proton ATPase subunit G OS=Schizosaccharomyces pombe (strain 972 / ATCC 24843) GN=vma10 PE=3 SV=2	136	56.9954	9.89939e-09	64.44	3	57	191	0	2	46
TRINITY_DN6858_c0_g1	1	1106	493	86.53	62.88	sp|Q6L285|GADH_PICTO D-glyceraldehyde dehydrogenase (NADP(+)) OS=Picrophilus torridus (strain ATCC 700027 / DSM 9790 / JCM 10055 / NBRC 100828) GN=PTO0332 PE=1 SV=1	424	167.933	2.48698e-45	33.75	2	92	1048	0	23	332
TRINITY_DN6431_c0_g2	1	1091	512	96.24	64.26	sp|O94269|UBP3_SCHPO Probable ubiquitin carboxyl-terminal hydrolase 3 OS=Schizosaccharomyces pombe (strain 972 / ATCC 24843) GN=ubp3 PE=3 SV=1	518	204.142	1.21361e-58	35.52	-3	37	1086	0	130	458
TRINITY_DN8636_c0_g1	1	1083	175	38.78	80	sp|P0CM54|CANB_CRYNJ Calcineurin subunit B OS=Cryptococcus neoformans var. neoformans serotype D (strain JEC21 / ATCC MYA-565) GN=CNB1 PE=2 SV=1	658	258.07	1.84615e-83	90	2	488	907	0	36	175
TRINITY_DN5921_c0_g1	1	1077	231	42.34	51.52	sp|Q01976|ADPP_YEAST ADP-ribose pyrophosphatase OS=Saccharomyces cerevisiae (strain ATCC 204508 / S288c) GN=YSA1 PE=1 SV=2	175	72.0182	7.91614e-21	32.68	1	448	903	0	111	229
TRINITY_DN2386_c0_g2	1	1070	383	63.64	51.96	sp|Q0V8G3|QPCTL_BOVIN Glutaminyl-peptide cyclotransferase-like protein OS=Bos taurus GN=QPCTL PE=2 SV=1	413	163.696	1.43912e-54	44.05	-3	154	834	0	185	383
TRINITY_DN5016_c0_g1	1	1064	266	36.09	48.12	sp|P0CO46|PNO1_CRYNJ Pre-rRNA-processing protein PNO1 OS=Cryptococcus neoformans var. neoformans serotype D (strain JEC21 / ATCC MYA-565) GN=PNO1 PE=3 SV=1	447	176.792	1.26756e-73	75	1	322	705	0	68	195
TRINITY_DN2970_c0_g2	1	1052	959	58.75	21.17	sp|B7K5H5|SYI_CYAP8 Isoleucine--tRNA ligase OS=Cyanothece sp. (strain PCC 8801) GN=ileS PE=3 SV=1	452	178.718	6.20939e-65	42.47	1	433	1050	0	425	627
TRINITY_DN6635_c0_g1	1	1024	595	92.29	52.94	sp|P0CS56|CMR1_CRYNJ DNA damage-binding protein CMR1 OS=Cryptococcus neoformans var. neoformans serotype D (strain JEC21 / ATCC MYA-565) GN=CNI03070 PE=3 SV=1	343	136.732	1.97988e-34	31.94	3	75	1019	0	5	319
TRINITY_DN4747_c0_g4	1	1007	1009	34.56	11.4	sp|Q06407|RGA2_YEAST Rho-type GTPase-activating protein 2 OS=Saccharomyces cerevisiae (strain ATCC 204508 / S288c) GN=RGA2 PE=1 SV=1	215	87.4261	1.51662e-17	35.59	-1	123	470	0	9	123
TRINITY_DN3731_c0_g2	1	1001	683	72.23	31.77	sp|O43079|AP1B1_SCHPO AP-1 complex subunit beta-1 OS=Schizosaccharomyces pombe (strain 972 / ATCC 24843) GN=apl2 PE=1 SV=1	689	270.011	1.98218e-82	55.19	-2	2	724	0	50	266
TRINITY_DN7971_c0_g5	1	994	536	9.96	6.16	sp|Q21W48|GUAA_RHOFT GMP synthase [glutamine-hydrolyzing] OS=Rhodoferax ferrireducens (strain ATCC BAA-621 / DSM 15236 / T118) GN=guaA PE=3 SV=1	134	56.225	1.83811e-07	75.76	-1	869	967	0	499	531
TRINITY_DN4374_c0_g2	1	989	592	99.8	53.55	sp|P38009|PUR92_YEAST Bifunctional purine biosynthesis protein ADE17 OS=Saccharomyces cerevisiae (strain ATCC 204508 / S288c) GN=ADE17 PE=1 SV=2	1113	433.335	1.49634e-146	70.3	1	1	987	0	51	367
TRINITY_DN6567_c0_g1	1	965	1905	51.61	8.66	sp|Q8CC88|VWA8_MOUSE von Willebrand factor A domain-containing protein 8 OS=Mus musculus GN=Vwa8 PE=1 SV=2	394	156.377	4.60993e-50	45.51	-1	153	650	0	1660	1824
TRINITY_DN3741_c0_g1	1	954	790	34.28	13.29	sp|P31244|RAD16_YEAST DNA repair protein RAD16 OS=Saccharomyces cerevisiae (strain ATCC 204508 / S288c) GN=RAD16 PE=1 SV=1	282	113.235	4.13442e-26	48.62	1	628	954	0	179	283
TRINITY_DN7219_c0_g1	1	942	878	76.11	25.74	sp|D4B0V1|E13B_ARTBC Probable glucan endo-1,3-beta-glucosidase ARB_02077 OS=Arthroderma benhamiae (strain ATCC MYA-4681 / CBS 112371) GN=ARB_02077 PE=1 SV=1	499	196.823	3.98942e-55	43.72	-1	226	942	0	645	870
TRINITY_DN7174_c0_g2	1	938	905	25.91	8.07	sp|Q59RR3|MNL1_CANAL Transcriptional regulator MNL1 OS=Candida albicans (strain SC5314 / ATCC MYA-2876) GN=MNL1 PE=3 SV=2	186	76.2554	5.15427e-14	45.35	-1	81	323	0	812	884
TRINITY_DN5393_c0_g1	1	923	653	82.23	40.58	sp|O14357|GPI1_SCHPO N-acetylglucosaminyl-phosphatidylinositol biosynthetic protein gpi1 OS=Schizosaccharomyces pombe (strain 972 / ATCC 24843) GN=gpi1 PE=2 SV=1	303	121.324	5.14234e-29	34.34	-1	111	869	0	325	589
TRINITY_DN1761_c0_g1	1	910	604	29.01	12.91	sp|Q76PD3|DBP6_SCHPO ATP-dependent RNA helicase dbp6 OS=Schizosaccharomyces pombe (strain 972 / ATCC 24843) GN=dbp6 PE=2 SV=1	150	62.3882	1.29491e-13	45.45	1	508	771	0	120	197
TRINITY_DN3844_c0_g1	1	904	222	22.9	31.98	sp|P25631|YCU1_YEAST Ankyrin repeat-containing protein YCR051W OS=Saccharomyces cerevisiae (strain ATCC 204508 / S288c) GN=YCR051W PE=1 SV=1	161	66.6254	9.75697e-12	46.48	-1	542	748	0	42	112
TRINITY_DN3087_c0_g1	1	884	834	74.66	25.42	sp|O74957|AGO1_SCHPO Protein argonaute OS=Schizosaccharomyces pombe (strain 972 / ATCC 24843) GN=ago1 PE=1 SV=1	193	78.9518	4.94559e-18	26.84	1	1	660	0	189	400
TRINITY_DN5254_c0_g2	1	878	237	77.22	99.16	sp|Q04432|HSP31_YEAST Glutathione-independent glyoxalase HSP31 OS=Saccharomyces cerevisiae (strain ATCC 204508 / S288c) GN=HSP31 PE=1 SV=1	211	85.8853	1.89702e-18	31.15	-3	106	783	0	1	235
TRINITY_DN4117_c0_g1	1	874	481	37.76	23.08	sp|Q4PE27|PFA4_USTMA Palmitoyltransferase PFA4 OS=Ustilago maydis (strain 521 / FGSC 9021) GN=PFA4 PE=3 SV=2	352	140.198	2.7309e-36	56.76	-1	2	331	0	205	315
TRINITY_DN3800_c0_g1	1	865	82	15.61	54.88	sp|Q870G5|GBG_LENED Guanine nucleotide-binding protein subunit gamma OS=Lentinula edodes GN=gg1 PE=3 SV=1	184	75.485	4.26315e-27	80	-3	525	659	0	1	45
TRINITY_DN2680_c0_g2	1	855	447	66.32	42.28	sp|P0CT90|OMT2_PHACR 3-O-methyltransferase 2 OS=Phanerochaete chrysosporium (strain RP-78 / ATCC MYA-4764 / FGSC 9002) GN=e_gw1.4.1014.1 PE=1 SV=1	302	120.939	7.91567e-30	35.94	3	285	851	0	11	199
TRINITY_DN8104_c0_g3	1	830	214	31.08	40.19	sp|Q55GJ6|PSB6_DICDI Proteasome subunit beta type-6 OS=Dictyostelium discoideum GN=psmB6 PE=1 SV=1	295	118.242	3.14948e-41	63.95	3	18	275	0	88	173
TRINITY_DN4131_c0_g1	1	826	424	75.18	47.88	sp|Q15427|SF3B4_HUMAN Splicing factor 3B subunit 4 OS=Homo sapiens GN=SF3B4 PE=1 SV=1	757	296.204	3.71006e-96	65.7	-1	170	790	0	5	207
TRINITY_DN2821_c0_g1	1	821	456	29.23	17.54	sp|Q0P5M9|MFS10_BOVIN Major facilitator superfamily domain-containing protein 10 OS=Bos taurus GN=MFSD10 PE=2 SV=1	199	81.2629	4.54598e-16	51.25	-2	2	241	0	82	161
TRINITY_DN4158_c0_g1	1	810	587	97.41	44.97	sp|P07921|LACP_KLULA Lactose permease OS=Kluyveromyces lactis (strain ATCC 8585 / CBS 2359 / DSM 70799 / NBRC 1267 / NRRL Y-1140 / WM37) GN=LAC12 PE=3 SV=1	355	141.354	9.85856e-37	31.2	-2	15	803	0	247	510
TRINITY_DN2371_c0_g1	1	802	865	83.04	25.9	sp|O43022|YGV8_SCHPO Uncharacterized protein C354.08c OS=Schizosaccharomyces pombe (strain 972 / ATCC 24843) GN=SPBC354.08c PE=3 SV=1	267	107.457	1.67626e-24	29.91	2	116	781	0	54	277
TRINITY_DN4317_c0_g1	1	791	219	41.72	49.77	sp|Q10355|YDB2_SCHPO Uncharacterized RNA-binding protein C22E12.02 OS=Schizosaccharomyces pombe (strain 972 / ATCC 24843) GN=SPAC22E12.02 PE=4 SV=1	329	131.339	3.79221e-35	52.73	3	357	686	0	9	117
TRINITY_DN2807_c0_g2	1	782	563	52.94	24.51	sp|Q8WYA6|CTBL1_HUMAN Beta-catenin-like protein 1 OS=Homo sapiens GN=CTNNBL1 PE=1 SV=1	204	83.1889	9.73289e-17	34.29	-3	331	744	0	402	539
TRINITY_DN3554_c0_g1	1	768	725	60.94	19.86	sp|Q5ZHV2|NAA35_CHICK N-alpha-acetyltransferase 35, NatC auxiliary subunit OS=Gallus gallus GN=NAA35 PE=2 SV=1	146	60.8474	2.2921e-09	27.11	-2	165	632	0	28	171
TRINITY_DN5466_c0_g1	1	763	343	47.18	35.28	sp|B9WYE6|VRDA_ASPPA Versiconal hemiacetal acetate reductase OS=Aspergillus parasiticus GN=vrdA PE=1 SV=1	338	134.806	1.87297e-35	53.72	2	404	763	0	1	121
TRINITY_DN6286_c0_g2	1	748	760	48.13	15.79	sp|Q9JK91|MLH1_MOUSE DNA mismatch repair protein Mlh1 OS=Mus musculus GN=Mlh1 PE=1 SV=2	453	179.104	2.97769e-64	68.33	-3	351	710	0	8	127
TRINITY_DN5078_c0_g1	1	729	251	69.96	60.96	sp|Q12574|TPIS_COPC7 Triosephosphate isomerase OS=Coprinopsis cinerea (strain Okayama-7 / 130 / ATCC MYA-4618 / FGSC 9003) GN=TPI PE=3 SV=2	577	226.868	5.40136e-72	66.47	-3	218	727	0	95	247
TRINITY_DN2916_c0_g1	1	715	399	96.08	51.13	sp|B7SIW2|XYNC_PHACH Endo-1,4-beta-xylanase C OS=Phanerochaete chrysosporium GN=xynC PE=1 SV=1	440	174.096	6.11126e-50	43.23	-1	23	709	0	1	204
TRINITY_DN4839_c0_g1	1	711	284	37.97	31.69	sp|Q9USH7|PSY1_SCHPO Syntaxin-like protein psy1 OS=Schizosaccharomyces pombe (strain 972 / ATCC 24843) GN=psy1 PE=3 SV=1	212	86.2705	1.02048e-18	47.78	-1	181	450	0	168	257
TRINITY_DN9995_c0_g1	1	699	853	72.53	20.87	sp|I7LRH3|MAPDE_PENBR Cytochrome P450 monooxygenase mpaDE OS=Penicillium brevicompactum GN=mpaDE PE=1 SV=1	239	96.6709	4.28836e-21	32.96	3	3	509	0	573	750
TRINITY_DN3054_c0_g2	1	695	766	28.92	8.75	sp|P33277|GAP1_SCHPO GTPase-activating protein OS=Schizosaccharomyces pombe (strain 972 / ATCC 24843) GN=gap1 PE=4 SV=1	190	77.7962	5.60385e-15	56.72	3	495	695	0	28	94
TRINITY_DN4639_c0_g3	1	687	1064	17.47	3.76	sp|Q5RD88|KDM4A_PONAB Lysine-specific demethylase 4A OS=Pongo abelii GN=KDM4A PE=2 SV=1	125	52.7582	9.60338e-07	55	-3	533	652	0	825	864
TRINITY_DN8715_c0_g1	1	669	272	24.66	23.53	sp|O75663|TIPRL_HUMAN TIP41-like protein OS=Homo sapiens GN=TIPRL PE=1 SV=2	119	50.447	2.25462e-12	42.19	2	503	667	0	114	177
TRINITY_DN5705_c0_g1	1	652	144	82.82	100	sp|O70454|BUD31_RAT Protein BUD31 homolog OS=Rattus norvegicus GN=Bud31 PE=2 SV=2	365	145.206	5.07158e-42	42.78	3	18	557	0	1	144
TRINITY_DN8228_c0_g1	1	648	602	93.52	33.06	sp|Q70J59|SED2_ASPFU Tripeptidyl-peptidase sed2 OS=Neosartorya fumigata (strain ATCC MYA-4609 / Af293 / CBS 101355 / FGSC A1100) GN=sed2 PE=1 SV=1	433	171.4	4.68693e-48	52.63	1	1	606	0	275	473
TRINITY_DN8315_c0_g1	1	644	1101	36.34	6.18	sp|D4AYW0|ABCG1_ARTBC ABC transporter G family member ARB_01379 OS=Arthroderma benhamiae (strain ATCC MYA-4681 / CBS 112371) GN=ARB_01379 PE=1 SV=1	147	61.2326	1.05017e-09	41.25	2	146	379	0	63	130
TRINITY_DN1402_c0_g1	1	636	128	46.7	76.56	sp|P67985|RL22_PIG 60S ribosomal protein L22 OS=Sus scrofa GN=RPL22 PE=1 SV=2	237	95.9005	2.73444e-23	58.59	-1	214	510	0	20	117
TRINITY_DN4345_c0_g1	1	632	574	86.87	32.06	sp|P50276|MUP1_YEAST High-affinity methionine permease OS=Saccharomyces cerevisiae (strain ATCC 204508 / S288c) GN=MUP1 PE=1 SV=1	303	121.324	2.10326e-30	40.22	1	7	555	0	168	351
TRINITY_DN6875_c0_g1	1	626	136	66.61	100	sp|Q4PB04|H32_USTMA Histone H3.2 OS=Ustilago maydis (strain 521 / FGSC 9021) GN=HHT2 PE=3 SV=3	572	224.942	3.27913e-73	86.33	-1	156	572	0	1	136
TRINITY_DN5854_c0_g1	1	619	155	38.77	47.74	sp|Q7RXR3|CENPA_NEUCR Histone H3-like centromeric protein hH3v OS=Neurospora crassa (strain ATCC 24698 / 74-OR23-1A / CBS 708.71 / DSM 1257 / FGSC 987) GN=hH3v PE=3 SV=1	271	108.997	1.6814e-34	65	-1	320	559	0	48	121
TRINITY_DN5760_c0_g2	1	607	423	48.43	20.09	sp|Q4R4E1|PIGM_MACFA GPI mannosyltransferase 1 OS=Macaca fascicularis GN=PIGM PE=2 SV=1	130	54.6842	4.37341e-17	46.94	3	3	296	0	250	334
TRINITY_DN4011_c0_g2	1	604	1091	98.84	18.42	sp|Q01896|ATN2_YEAST Sodium transport ATPase 2 OS=Saccharomyces cerevisiae (strain ATCC 204508 / S288c) GN=ENA2 PE=1 SV=1	672	263.462	4.51107e-80	62.19	2	8	604	0	711	911
TRINITY_DN2280_c0_g2	1	590	273	47.8	35.16	sp|Q6FWV2|ATP10_CANGA Mitochondrial ATPase complex subunit ATP10 OS=Candida glabrata (strain ATCC 2001 / CBS 138 / JCM 3761 / NBRC 0622 / NRRL Y-65) GN=ATP10 PE=3 SV=1	140	58.5362	2.45117e-12	35.42	1	235	516	0	175	270
TRINITY_DN4491_c0_g1	1	572	433	46.68	20.55	sp|P24322|GGPPS_NEUCR Geranylgeranyl pyrophosphate synthase OS=Neurospora crassa (strain ATCC 24698 / 74-OR23-1A / CBS 708.71 / DSM 1257 / FGSC 987) GN=al-3 PE=2 SV=2	338	134.806	8.56973e-36	65.17	2	302	568	0	137	225
TRINITY_DN5628_c0_g2	1	570	469	70	28.36	sp|O13310|ORB6_SCHPO Serine/threonine-protein kinase orb6 OS=Schizosaccharomyces pombe (strain 972 / ATCC 24843) GN=orb6 PE=1 SV=1	382	151.754	6.92487e-42	55.64	-2	3	401	0	2	134
TRINITY_DN7164_c1_g1	1	553	694	66.73	17.15	sp|Q5K8R6|CXT1_CRYNJ Beta-1,2-xylosyltransferase 1 OS=Cryptococcus neoformans var. neoformans serotype D (strain JEC21 / ATCC MYA-565) GN=CXT1 PE=1 SV=1	123	51.9878	7.78641e-07	32.8	-3	3	371	0	199	317
TRINITY_DN1172_c0_g2	1	539	706	35.62	10.06	sp|Q90625|ZBT17_CHICK Zinc finger and BTB domain-containing protein 17 (Fragment) OS=Gallus gallus GN=ZBTB17 PE=2 SV=1	131	55.0694	7.41368e-08	39.44	2	326	517	0	282	352
TRINITY_DN4907_c0_g1	1	530	838	54.34	10.62	sp|B2RY56|RBM25_MOUSE RNA-binding protein 25 OS=Mus musculus GN=Rbm25 PE=1 SV=2	187	76.6406	7.3155e-15	44.79	-2	8	295	0	88	176
TRINITY_DN2018_c0_g1	1	524	1854	70.99	6.74	sp|O14234|CCH1_SCHPO Calcium-channel protein cch1 OS=Schizosaccharomyces pombe (strain 972 / ATCC 24843) GN=cch1 PE=3 SV=1	141	58.9214	4.70629e-09	28.91	-1	3	374	0	1535	1659
TRINITY_DN2038_c0_g3	1	507	1553	98.82	10.75	sp|A0A0U1LQE1|CCTS_TALIS ABC transporter cctS OS=Talaromyces islandicus GN=cctS PE=3 SV=1	137	57.3806	1.24861e-08	31.69	3	3	503	0	563	729
TRINITY_DN1306_c0_g2	1	504	500	36.9	12.4	sp|O74187|ALDH_AGABI Aldehyde dehydrogenase OS=Agaricus bisporus GN=aldA PE=3 SV=1	225	91.2781	4.23079e-35	67.74	1	1	186	0	218	279
TRINITY_DN5274_c0_g2	1	501	703	99.4	22.9	sp|O74438|MCP2_SCHPO Meiotic coiled-coil protein 2 OS=Schizosaccharomyces pombe (strain 972 / ATCC 24843) GN=mcp2 PE=4 SV=1	308	123.25	3.11008e-31	38.32	2	2	499	0	409	569
TRINITY_DN5760_c0_g1	1	490	142	82.04	92.96	sp|Q5R6P6|GMFB_PONAB Glia maturation factor beta OS=Pongo abelii GN=GMFB PE=2 SV=3	235	95.1301	2.24748e-23	37.31	-3	81	482	0	7	138
TRINITY_DN10141_c0_g1	1	487	544	99.18	29.04	sp|C0NX46|CBPYA_AJECG Carboxypeptidase Y homolog A OS=Ajellomyces capsulatus (strain G186AR / H82 / ATCC MYA-2454 / RMSCC 2432) GN=CPYA PE=3 SV=1	293	117.472	9.95342e-30	39.88	-1	5	487	0	348	505
TRINITY_DN10344_c0_g1	1	483	542	38.51	11.81	sp|P30574|CBPY_CANAX Carboxypeptidase Y OS=Candida albicans GN=CPY1 PE=2 SV=2	178	73.1738	4.61405e-14	53.12	-3	2	187	0	116	179
TRINITY_DN3662_c0_g2	1	472	1334	98.52	9.9	sp|Q9Y7U6|RGF1_SCHPO Rho1 guanine nucleotide exchange factor 1 OS=Schizosaccharomyces pombe (strain 972 / ATCC 24843) GN=rgf1 PE=1 SV=1	132	55.4546	4.3777e-08	27.74	3	6	470	0	699	830
TRINITY_DN9292_c0_g2	1	470	203	70.21	46.31	sp|O94285|RPC8_SCHPO DNA-directed RNA polymerase III subunit rpc8 OS=Schizosaccharomyces pombe (strain 972 / ATCC 24843) GN=rpc25 PE=1 SV=1	237	95.9005	2.57514e-23	40.91	-2	71	400	0	7	100
TRINITY_DN3627_c0_g2	1	458	522	50.44	14.18	sp|Q9BQ87|TBL1Y_HUMAN F-box-like/WD repeat-containing protein TBL1Y OS=Homo sapiens GN=TBL1Y PE=2 SV=1	173	71.2478	1.57138e-13	38.96	-3	226	456	0	428	501
TRINITY_DN7562_c0_g1	1	455	642	87.69	20.72	sp|B0DZL3|AMPP1_LACBS Probable Xaa-Pro aminopeptidase P OS=Laccaria bicolor (strain S238N-H82 / ATCC MYA-4686) GN=AMPP PE=3 SV=1	541	213.001	4.13341e-64	72.93	-2	56	454	0	510	642
TRINITY_DN3843_c0_g1	1	444	455	67.57	21.76	sp|Q3UHG7|LCHN_MOUSE Protein LCHN OS=Mus musculus GN=Lchn PE=2 SV=1	161	66.6254	4.50966e-12	35.64	2	41	340	0	59	157
TRINITY_DN5024_c0_g3	1	432	764	75.69	14.79	sp|P40566|YIS7_YEAST Uncharacterized glycosyl hydrolase YIR007W OS=Saccharomyces cerevisiae (strain ATCC 204508 / S288c) GN=YIR007W PE=1 SV=1	199	81.2629	9.12903e-17	39.83	2	59	385	0	121	233
TRINITY_DN5343_c0_g3	1	423	536	86.52	20.52	sp|Q4WAZ6|FMAG_ASPFU Multifunctional cytochrome P450 monooxygenase af510 OS=Neosartorya fumigata (strain ATCC MYA-4609 / Af293 / CBS 101355 / FGSC A1100) GN=af510 PE=1 SV=1	179	73.559	2.46869e-14	36.89	3	6	371	0	203	312
TRINITY_DN780_c0_g1	1	409	722	87.29	16.76	sp|A8NVW1|IML2_COPC7 Mitochondrial outer membrane protein IML2 OS=Coprinopsis cinerea (strain Okayama-7 / 130 / ATCC MYA-4618 / FGSC 9003) GN=IML2 PE=3 SV=2	309	123.635	9.34711e-32	52.07	-1	2	358	0	8	128
TRINITY_DN3464_c0_g1	1	406	1375	97.54	9.53	sp|Q9UTL9|YIV5_SCHPO Uncharacterized ATP-dependent helicase C144.05 OS=Schizosaccharomyces pombe (strain 972 / ATCC 24843) GN=SPAC144.05 PE=3 SV=1	261	105.145	5.05427e-25	41.67	1	7	402	0	1172	1302
TRINITY_DN1044_c0_g1	1	400	730	63.75	12.33	sp|P09379|GYP7_YARLI GTPase-activating protein GYP7 OS=Yarrowia lipolytica (strain CLIB 122 / E 150) GN=GYP7 PE=3 SV=2	232	93.9745	2.37599e-21	53.33	-1	146	400	0	611	700
TRINITY_DN2340_c0_g1	1	377	495	97.08	24.65	sp|P87184|ALP2_ASPFU Alkaline protease 2 OS=Neosartorya fumigata (strain ATCC MYA-4609 / Af293 / CBS 101355 / FGSC A1100) GN=alp2 PE=1 SV=1	332	132.494	1.00505e-35	76.23	2	2	367	0	145	266
TRINITY_DN2465_c0_g1	1	366	442	29.51	8.14	sp|D4AUX6|A8043_ARTBC Uncharacterized secreted protein ARB_08043 OS=Arthroderma benhamiae (strain ATCC MYA-4681 / CBS 112371) GN=ARB_08043 PE=1 SV=1	112	47.7506	3.6515e-11	47.22	-2	3	110	0	146	181
TRINITY_DN2395_c0_g1	1	361	621	19.94	3.86	sp|O95671|ASML_HUMAN N-acetylserotonin O-methyltransferase-like protein OS=Homo sapiens GN=ASMTL PE=1 SV=3	85	37.3502	2.03651e-07	75	-2	223	294	0	5	28
TRINITY_DN4616_c0_g1	1	343	260	71.72	31.54	sp|Q86AQ7|VAM7B_DICDI Vesicle-associated membrane protein 7B OS=Dictyostelium discoideum GN=vamp7B PE=3 SV=1	226	91.6633	7.38782e-22	46.34	2	68	313	0	4	85
TRINITY_DN7666_c0_g2	1	336	819	92.86	12.58	sp|Q5R822|NUP93_PONAB Nuclear pore complex protein Nup93 OS=Pongo abelii GN=NUP93 PE=2 SV=2	140	58.5362	1.7324e-09	32.69	2	20	331	0	46	148
TRINITY_DN8748_c0_g4	1	332	450	46.08	11.78	sp|Q08448|YO059_YEAST Putative lipase YOR059C OS=Saccharomyces cerevisiae (strain ATCC 204508 / S288c) GN=YOR059C PE=1 SV=1	124	52.373	1.45938e-07	45.28	1	49	201	0	80	132
TRINITY_DN1854_c0_g1	1	331	718	34.44	5.29	sp|P39007|STT3_YEAST Dolichyl-diphosphooligosaccharide--protein glycosyltransferase subunit STT3 OS=Saccharomyces cerevisiae (strain ATCC 204508 / S288c) GN=STT3 PE=1 SV=2	141	58.9214	1.21509e-09	68.42	3	135	248	0	14	51
TRINITY_DN3840_c0_g3	1	328	1031	97.87	10.38	sp|P07276|RAD2_YEAST DNA repair protein RAD2 OS=Saccharomyces cerevisiae (strain ATCC 204508 / S288c) GN=RAD2 PE=1 SV=2	311	124.405	3.49637e-32	52.34	-2	7	327	0	19	125
TRINITY_DN236_c0_g1	1	303	344	94.06	26.16	sp|O14220|MEU26_SCHPO Meiotic expression up-regulated protein 26 OS=Schizosaccharomyces pombe (strain 972 / ATCC 24843) GN=meu26 PE=2 SV=1	201	82.0333	1.65744e-18	40.4	3	18	302	0	217	306
TRINITY_DN8342_c0_g4	1	287	430	58.54	13.02	sp|P78575|ERG24_ASCIM Delta(14)-sterol reductase OS=Ascobolus immersus GN=ERG3 PE=3 SV=1	216	87.8113	2.79858e-20	69.64	1	1	168	0	365	420
TRINITY_DN3566_c0_g1	1	282	206	72.34	32.52	sp|Q9P8J9|RHO3_SCHCO GTP-binding protein Rho3 OS=Schizophyllum commune GN=RHO3 PE=2 SV=1	292	117.087	3.6432e-32	79.41	-1	1	204	0	1	67
TRINITY_DN5157_c0_g2	1	254	792	93.31	9.97	sp|A1CND4|XYND_ASPCL Probable exo-1,4-beta-xylosidase xlnD OS=Aspergillus clavatus (strain ATCC 1007 / CBS 513.65 / DSM 816 / NCTC 3887 / NRRL 1) GN=xlnD PE=3 SV=2	328	130.954	4.18196e-35	74.68	3	3	239	0	564	642
TRINITY_DN10206_c0_g1	1	251	340	66.93	16.47	sp|Q14565|DMC1_HUMAN Meiotic recombination protein DMC1/LIM15 homolog OS=Homo sapiens GN=DMC1 PE=1 SV=2	141	58.9214	3.15912e-10	51.79	2	83	250	0	8	63
TRINITY_DN2757_c0_g5	1	248	1609	99.19	5.1	sp|O13394|CHS5_USTMA Chitin synthase 5 OS=Ustilago maydis (strain 521 / FGSC 9021) GN=CHS5 PE=3 SV=3	399	158.303	3.22358e-44	81.71	-1	3	248	0	884	965
TRINITY_DN3023_c0_g1	1	242	1328	63.22	3.84	sp|P10978|POLX_TOBAC Retrovirus-related Pol polyprotein from transposon TNT 1-94 OS=Nicotiana tabacum PE=2 SV=1	161	66.6254	1.48352e-12	56.86	-3	52	204	0	1111	1161
TRINITY_DN4335_c0_g2	1	237	898	97.47	7.57	sp|D8QAM0|PFF1_SCHCM Vacuolar membrane protease OS=Schizophyllum commune (strain H4-8 / FGSC 9210) GN=SCHCODRAFT_69280 PE=3 SV=1	114	48.521	1.93121e-06	46.75	-3	2	232	0	548	615
TRINITY_DN9519_c0_g1	1	233	1434	82.4	4.46	sp|D3Z4R1|HFM1_MOUSE Probable ATP-dependent DNA helicase HFM1 OS=Mus musculus GN=Hfm1 PE=3 SV=2	130	54.6842	1.66988e-08	39.06	-1	39	230	0	485	548
TRINITY_DN9315_c4_g1	1	6086	391	8.03	35.04	sp|O14133|ATE1_SCHPO Arginyl-tRNA--protein transferase 1 OS=Schizosaccharomyces pombe (strain 972 / ATCC 24843) GN=SPAC3C7.07c PE=3 SV=3	257	103.605	1.25922e-43	39.63	2	35	523	0	10	146
TRINITY_DN6632_c0_g1	1	5684	419	13.51	62.05	sp|Q7D745|Y2525_MYCTO Putative trans-acting enoyl reductase MT2525 OS=Mycobacterium tuberculosis (strain CDC 1551 / Oshkosh) GN=MT2525 PE=3 SV=2	355	141.354	1.30699e-33	35.82	1	7	774	0	8	267
TRINITY_DN8092_c0_g5	1	5466	576	6.64	21.35	sp|Q12627|DLD1_KLULA D-lactate dehydrogenase [cytochrome], mitochondrial OS=Kluyveromyces lactis (strain ATCC 8585 / CBS 2359 / DSM 70799 / NBRC 1267 / NRRL Y-1140 / WM37) GN=DLD1 PE=3 SV=2	247	99.7525	1.61793e-51	40.32	1	1528	1890	0	446	568
TRINITY_DN4460_c0_g1	1	5244	1087	10.93	17.66	sp|Q09690|POM1_SCHPO Dual specificity protein kinase pom1 OS=Schizosaccharomyces pombe (strain 972 / ATCC 24843) GN=pom1 PE=1 SV=1	597	234.572	2.12311e-107	54.17	2	4325	4897	0	642	833
TRINITY_DN8032_c0_g1	1	5056	744	36.49	81.18	sp|O42783|TREB_NEUCR Neutral trehalase OS=Neurospora crassa (strain ATCC 24698 / 74-OR23-1A / CBS 708.71 / DSM 1257 / FGSC 987) GN=treB PE=2 SV=2	1717	665.996	0	54.57	3	2442	4286	0	25	628
TRINITY_DN9173_c0_g2	1	4854	2335	35.11	24.88	sp|G4NYJ6|WAPA_BACPT tRNA3(Ser)-specific nuclease WapA OS=Bacillus subtilis subsp. spizizenii (strain TU-B-10) GN=wapA PE=1 SV=1	230	93.2041	1.90598e-17	25.96	3	2730	4433	0	1619	2199
TRINITY_DN6149_c0_g1	1	4677	905	4.62	8.18	sp|P18480|SNF5_YEAST SWI/SNF chromatin-remodeling complex subunit SNF5 OS=Saccharomyces cerevisiae (strain ATCC 204508 / S288c) GN=SNF5 PE=1 SV=3	169	69.707	1.66513e-24	48.65	-1	1633	1848	0	589	662
TRINITY_DN8933_c0_g1	1	4508	404	7.39	26.49	sp|Q68WK6|ODP2_RICTY Dihydrolipoyllysine-residue acetyltransferase component of pyruvate dehydrogenase complex OS=Rickettsia typhi (strain ATCC VR-144 / Wilmington) GN=pdhC PE=3 SV=1	200	81.6481	1.21299e-14	34.82	-1	2046	2378	0	5	111
TRINITY_DN9025_c0_g1	1	4414	430	5.03	16.51	sp|O59958|CRE1_NEUCR DNA-binding protein cre-1 OS=Neurospora crassa (strain ATCC 24698 / 74-OR23-1A / CBS 708.71 / DSM 1257 / FGSC 987) GN=cre-1 PE=2 SV=2	277	111.309	3.95516e-24	68.92	-2	4096	4317	0	62	132
TRINITY_DN8987_c0_g1	1	4316	834	32.04	52.52	sp|O74957|AGO1_SCHPO Protein argonaute OS=Schizosaccharomyces pombe (strain 972 / ATCC 24843) GN=ago1 PE=1 SV=1	581	228.409	1.27142e-87	32.18	-3	1939	3321	0	294	731
TRINITY_DN8746_c0_g1	1	4148	958	40.57	59.5	sp|Q09764|YA7B_SCHPO Uncharacterized protein C24H6.11c OS=Schizosaccharomyces pombe (strain 972 / ATCC 24843) GN=SPAC24H6.11c PE=4 SV=1	960	374.4	4.12468e-109	37.57	1	2206	3888	0	353	922
TRINITY_DN9062_c0_g1	1	3989	508	14.21	34.65	sp|P0DPA7|PSIH_PSICU Cytochrome P450 monooxygenase psiH OS=Psilocybe cubensis GN=psiH PE=1 SV=1	173	71.2478	2.09691e-20	31.77	1	928	1494	0	172	347
TRINITY_DN8827_c0_g1	1	3848	2278	21.6	11.9	sp|P34756|FAB1_YEAST 1-phosphatidylinositol 3-phosphate 5-kinase FAB1 OS=Saccharomyces cerevisiae (strain ATCC 204508 / S288c) GN=FAB1 PE=1 SV=3	533	209.92	2.93961e-53	39.21	2	893	1723	0	789	1059
TRINITY_DN7763_c0_g1	1	3774	319	14.86	58.31	sp|P48036|ANXA5_MOUSE Annexin A5 OS=Mus musculus GN=Anxa5 PE=1 SV=1	275	110.538	2.52369e-24	34.22	-3	3134	3694	0	11	196
TRINITY_DN8779_c0_g2	1	3700	306	18	73.86	sp|P56859|MET16_EMENI Phosphoadenosine phosphosulfate reductase OS=Emericella nidulans (strain FGSC A4 / ATCC 38163 / CBS 112.46 / NRRL 194 / M139) GN=sA PE=3 SV=3	691	270.781	3.56837e-80	55.07	-2	2893	3558	0	48	273
TRINITY_DN7201_c0_g1	1	3626	1004	24.9	26.59	sp|Q10408|YD83_SCHPO Uncharacterized protein C1F3.03 OS=Schizosaccharomyces pombe (strain 972 / ATCC 24843) GN=SPAC1F3.03 PE=4 SV=1	184	75.485	2.8173e-12	26.05	-2	2207	3109	0	139	405
TRINITY_DN8975_c0_g1	1	3558	563	25.3	57.19	sp|P17573|LIP1_GEOCN Lipase 1 OS=Geotrichum candidum GN=LIP1 PE=1 SV=2	278	111.694	1.11744e-33	30.82	2	2102	3001	0	170	491
TRINITY_DN8576_c0_g2	1	3389	1337	70.73	60.96	sp|A0A0D1CZ63|FER6_USTMA Multidrug resistance protein fer6 OS=Ustilago maydis (strain 521 / FGSC 9021) GN=fer6 PE=2 SV=1	1149	447.203	4.63129e-134	33.69	-3	10	2406	0	225	1039
TRINITY_DN8214_c0_g1	1	3251	428	19.66	49.77	sp|O34371|YTET_BACSU Putative oxidoreductase YteT OS=Bacillus subtilis (strain 168) GN=yteT PE=2 SV=1	451	178.333	1.61311e-46	42.33	1	1603	2241	0	4	216
TRINITY_DN6776_c0_g2	1	3203	1224	29.88	25.25	sp|Q8CIE6|COPA_MOUSE Coatomer subunit alpha OS=Mus musculus GN=Copa PE=1 SV=2	599	235.343	3.36749e-62	38.56	-2	1610	2566	0	913	1221
TRINITY_DN9271_c0_g2	1	3166	589	19.24	32.94	sp|Q10072|YAN6_SCHPO Uncharacterized transporter C3H1.06c OS=Schizosaccharomyces pombe (strain 972 / ATCC 24843) GN=SPAC3H1.06c PE=3 SV=1	412	163.31	1.26627e-40	49.05	-3	2079	2687	0	42	235
TRINITY_DN7403_c0_g1	1	3092	307	12.03	34.2	sp|O13713|NAB2_SCHPO Nuclear polyadenylated RNA-binding protein nab2 OS=Schizosaccharomyces pombe (strain 972 / ATCC 24843) GN=nab2 PE=3 SV=1	186	76.2554	1.69024e-13	34.65	-1	2034	2405	0	174	278
TRINITY_DN7776_c0_g1	1	3050	649	33.84	50.08	sp|P46063|RECQ1_HUMAN ATP-dependent DNA helicase Q1 OS=Homo sapiens GN=RECQL PE=1 SV=3	775	303.138	1.69202e-109	43.02	3	714	1745	0	68	392
TRINITY_DN9164_c1_g4	1	3015	786	58.81	71.63	sp|O00534|VMA5A_HUMAN von Willebrand factor A domain-containing protein 5A OS=Homo sapiens GN=VWA5A PE=2 SV=2	438	173.326	2.98697e-43	27.74	1	481	2253	0	48	610
TRINITY_DN9086_c1_g1	1	2975	508	20.17	40.16	sp|P0DPA7|PSIH_PSICU Cytochrome P450 monooxygenase psiH OS=Psilocybe cubensis GN=psiH PE=1 SV=1	484	191.045	2.55835e-50	44.39	-2	122	721	0	302	505
TRINITY_DN4737_c1_g1	1	2943	695	23.14	34.1	sp|O74363|YND2_SCHPO G-patch and R3H domain-containing protein C30B4.02c OS=Schizosaccharomyces pombe (strain 972 / ATCC 24843) GN=SPBC30B4.02c PE=4 SV=1	206	83.9593	3.83459e-15	30.58	2	2021	2701	0	459	695
TRINITY_DN7824_c0_g1	1	2916	190	17.08	86.84	sp|O80438|MAK3_ARATH N-alpha-acetyltransferase MAK3 OS=Arabidopsis thaliana GN=MAK3 PE=1 SV=1	439	173.711	1.3482e-47	55.29	-2	336	833	0	16	180
TRINITY_DN5225_c0_g2	1	2881	297	28.64	92.59	sp|B8PAR0|RSSA_POSPM 40S ribosomal protein S0 OS=Postia placenta (strain ATCC 44394 / Madison 698-R) GN=RPS0 PE=3 SV=1	1167	454.136	2.37889e-150	86.55	3	276	1100	0	1	275
TRINITY_DN6809_c0_g1	1	2850	482	19.05	34.02	sp|O94264|YORF_SCHPO Uncharacterized RING finger protein P8B7.15c OS=Schizosaccharomyces pombe (strain 972 / ATCC 24843) GN=SPBP8B7.15c PE=4 SV=1	408	161.77	2.53098e-42	44.26	-3	1394	1936	0	191	354
TRINITY_DN8792_c0_g1	1	2788	523	17.22	31.74	sp|Q5ZMW3|API5_CHICK Apoptosis inhibitor 5 OS=Gallus gallus GN=API5 PE=2 SV=1	168	69.3218	9.3509e-11	34.71	-1	1973	2452	0	39	204
TRINITY_DN9250_c0_g1	1	2756	532	35.38	55.64	sp|Q9H816|DCR1B_HUMAN 5&apos; exonuclease Apollo OS=Homo sapiens GN=DCLRE1B PE=1 SV=1	267	107.457	7.8704e-23	27.44	-3	1585	2559	0	48	343
TRINITY_DN9186_c0_g4	1	2722	1275	6.39	4.55	sp|Q10164|RGA2_SCHPO Probable Rho-type GTPase-activating protein 2 OS=Schizosaccharomyces pombe (strain 972 / ATCC 24843) GN=rga2 PE=1 SV=1	150	62.3882	1.84729e-08	48.28	3	1527	1700	0	1189	1246
TRINITY_DN680_c0_g1	1	2685	895	77.09	79.33	sp|Q4P0P0|EIF3C_USTMA Eukaryotic translation initiation factor 3 subunit C OS=Ustilago maydis (strain 521 / FGSC 9021) GN=NIP1 PE=3 SV=1	1676	650.203	0	52.38	2	485	2554	0	142	851
TRINITY_DN2776_c0_g1	1	2640	450	53.07	99.33	sp|Q9P4R4|LYS9_MAGO7 Saccharopine dehydrogenase [NADP(+), L-glutamate-forming] OS=Magnaporthe oryzae (strain 70-15 / ATCC MYA-4617 / FGSC 8958) GN=LYS3 PE=1 SV=2	1237	481.1	2.46512e-159	56.69	1	979	2379	0	3	449
TRINITY_DN8346_c1_g2	1	2595	603	30.75	44.61	sp|Q6BM14|PEX5_DEBHA Peroxisomal targeting signal receptor OS=Debaryomyces hansenii (strain ATCC 36239 / CBS 767 / JCM 1990 / NBRC 0083 / IGC 2968) GN=PEX5 PE=3 SV=2	554	218.009	2.52824e-59	41.52	-1	49	846	0	335	603
TRINITY_DN5876_c0_g1	1	2571	355	16.69	34.93	sp|Q09907|NTH_SCHPO Endonuclease III homolog OS=Schizosaccharomyces pombe (strain 972 / ATCC 24843) GN=nth1 PE=1 SV=1	388	154.066	1.72474e-54	54.55	-1	1531	1959	0	110	233
TRINITY_DN5058_c0_g1	1	2523	435	24.14	40	sp|Q9P371|SST2_SCHPO AMSH-like protease sst2 OS=Schizosaccharomyces pombe (strain 972 / ATCC 24843) GN=sst2 PE=1 SV=1	428	169.474	6.54233e-44	42.86	-3	149	757	0	260	433
TRINITY_DN6376_c0_g1	1	2503	587	29.84	43.95	sp|P07921|LACP_KLULA Lactose permease OS=Kluyveromyces lactis (strain ATCC 8585 / CBS 2359 / DSM 70799 / NBRC 1267 / NRRL Y-1140 / WM37) GN=LAC12 PE=3 SV=1	393	155.992	1.07026e-51	34.48	-1	1376	2122	0	211	468
TRINITY_DN6007_c0_g1	1	2460	620	29.51	34.35	sp|A3KMV8|RBP10_BOVIN Ran-binding protein 10 OS=Bos taurus GN=RANBP10 PE=2 SV=1	393	155.992	2.76475e-45	35.95	3	1140	1865	0	129	341
TRINITY_DN1843_c0_g1	1	2439	755	71.09	78.01	sp|Q59X23|PMT4_CANAL Dolichyl-phosphate-mannose--protein mannosyltransferase 4 OS=Candida albicans (strain SC5314 / ATCC MYA-2876) GN=PMT4 PE=2 SV=2	1468	570.081	0	48.24	1	274	2007	0	62	650
TRINITY_DN8362_c1_g1	1	2422	249	23.53	74.3	sp|Q5KJ55|NNRE_CRYNJ NAD(P)H-hydrate epimerase OS=Cryptococcus neoformans var. neoformans serotype D (strain JEC21 / ATCC MYA-565) GN=CND00610 PE=3 SV=1	477	188.348	6.19001e-59	51.22	-1	1388	1957	0	62	246
TRINITY_DN9193_c1_g2	1	2381	1816	53.93	22.41	sp|P49793|NUP98_RAT Nuclear pore complex protein Nup98-Nup96 OS=Rattus norvegicus GN=Nup98 PE=1 SV=2	414	164.081	4.76525e-40	29.91	2	506	1789	0	1296	1702
TRINITY_DN8271_c0_g1	1	2357	977	5.98	4.81	sp|Q1MTM9|YFN1_SCHPO Uncharacterized transcriptional regulatory protein C1327.01c OS=Schizosaccharomyces pombe (strain 972 / ATCC 24843) GN=SPAC1327.01c PE=1 SV=2	129	54.299	4.25813e-06	42.55	-1	1062	1202	0	66	112
TRINITY_DN5047_c0_g1	1	2292	608	64.01	81.58	sp|P53388|DIP5_YEAST Dicarboxylic amino acid permease OS=Saccharomyces cerevisiae (strain ATCC 204508 / S288c) GN=DIP5 PE=1 SV=1	1031	401.749	5.69706e-128	43.46	-2	222	1688	0	71	566
TRINITY_DN4725_c0_g1	1	2272	747	51.36	49.4	sp|Q7S464|EIF3B_NEUCR Eukaryotic translation initiation factor 3 subunit B OS=Neurospora crassa (strain ATCC 24698 / 74-OR23-1A / CBS 708.71 / DSM 1257 / FGSC 987) GN=prt-1 PE=3 SV=1	886	345.895	6.88612e-163	44.25	1	4	1170	0	92	460
TRINITY_DN9028_c0_g10	1	2196	839	38.39	30.87	sp|Q9UP83|COG5_HUMAN Conserved oligomeric Golgi complex subunit 5 OS=Homo sapiens GN=COG5 PE=1 SV=3	258	103.99	3.33923e-27	27.43	-2	1002	1844	0	563	821
TRINITY_DN7648_c0_g1	1	2145	385	40.56	75.58	sp|Q01752|AAD_PHACH Aryl-alcohol dehydrogenase [NADP(+)] OS=Phanerochaete chrysosporium PE=1 SV=1	975	380.178	6.7682e-127	62.33	-2	408	1277	0	7	297
TRINITY_DN8940_c0_g4	1	2092	1323	33.41	18.22	sp|O13686|WDR59_SCHPO Uncharacterized RWD, RING finger and WD repeat-containing protein C11E3.05 OS=Schizosaccharomyces pombe (strain 972 / ATCC 24843) GN=SPAC11E3.05 PE=1 SV=1	223	90.5077	2.77389e-17	25.86	-1	1274	1972	0	318	558
TRINITY_DN5201_c0_g1	1	2040	417	46.32	74.58	sp|Q6C2E3|QCR2_YARLI Cytochrome b-c1 complex subunit 2, mitochondrial OS=Yarrowia lipolytica (strain CLIB 122 / E 150) GN=QCR2 PE=3 SV=1	326	130.183	4.1709e-31	35.31	3	6	950	0	106	416
TRINITY_DN6608_c0_g1	1	2025	673	44.44	42.64	sp|P09215|KPCD_RAT Protein kinase C delta type OS=Rattus norvegicus GN=Prkcd PE=1 SV=1	307	122.865	9.21125e-28	28.29	-2	318	1217	0	338	624
TRINITY_DN6265_c0_g1	1	2010	509	80.6	94.11	sp|Q54JD9|SCOT_DICDI Probable succinyl-CoA:3-ketoacid coenzyme A transferase, mitochondrial OS=Dictyostelium discoideum GN=oxct1 PE=3 SV=1	1060	412.92	8.64839e-135	44.87	3	198	1817	0	23	501
TRINITY_DN6259_c0_g1	1	1980	739	59.85	53.59	sp|A6YRN9|TREPH_PLEPU Trehalose phosphorylase OS=Pleurotus pulmonarius GN=TP PE=2 SV=1	2071	802.357	0	98.23	1	292	1476	0	42	437
TRINITY_DN7161_c0_g1	1	1950	791	19.38	15.55	sp|Q8K4Z5|SF3A1_MOUSE Splicing factor 3A subunit 1 OS=Mus musculus GN=Sf3a1 PE=1 SV=1	253	102.064	4.52665e-21	42.06	1	4	381	0	191	313
TRINITY_DN7043_c0_g1	1	1938	282	22.91	51.06	sp|Q9GJT2|ESTD_PIG S-formylglutathione hydrolase OS=Sus scrofa GN=ESD PE=2 SV=1	389	154.451	9.76186e-56	55.33	3	615	1058	0	139	282
TRINITY_DN7969_c0_g2	1	1919	573	36.89	44.33	sp|Q4R335|S41A2_MACFA Solute carrier family 41 member 2 OS=Macaca fascicularis GN=SLC41A2 PE=2 SV=1	190	77.7962	1.09287e-13	29.69	-3	1210	1917	0	312	565
TRINITY_DN5136_c0_g1	1	1848	1058	26.79	16.82	sp|P04323|POL3_DROME Retrovirus-related Pol polyprotein from transposon 17.6 OS=Drosophila melanogaster GN=pol PE=3 SV=1	172	70.8626	5.68054e-19	26.34	-2	984	1478	0	202	379
TRINITY_DN7285_c0_g1	1	1836	217	20.26	57.14	sp|Q9CPY6|GID4_MOUSE Glucose-induced degradation protein 4 homolog OS=Mus musculus GN=Gid4 PE=1 SV=1	308	123.25	2.40095e-30	47.2	1	817	1188	0	68	191
[truncated: 5,282 more rows]

## Sheet: Table S3
query_name	hsp	query_length	subject_length	query_coverage(%)	subject_coverage(%)	annotation	score	bit_score	evalue	identity(%)	query_frame	query_start	query_end	subject_frame	subject_start	subject_end
[truncated: 13,611 more rows]

## Sheet: Table S4
Species	Hit number
[truncated: 106 more rows]

[truncated: 6 more sheets: Table S5, Table S6, Table S7, Table S8, Table S9, Table S10]
